# Supplementary material
Source: publisher figshare collection journal article supplement (https://acs.figshare.com/ndownloader/files/6054513)
Supplement: Supplementary file 1 [file 6054513]

data_global
_audit_creation_date                               2016-06-06
_audit_creation_method                            'by CrystalStructure 4.2.1'
_audit_update_record                               ?

#==============================================================================
# PROCESSING SUMMARY (IUCr Office Use Only)

_journal_date_recd_electronic                      ?
_journal_date_from_coeditor                        ?
_journal_date_accepted                             ?
_journal_coeditor_code                             ?

#==============================================================================
# SUBMISSION DETAILS

_publ_contact_author_name                         'ENTER NAME'
_publ_contact_author_email                        'ENTER EMAIL ADDRESS'
_publ_contact_author_fax                          'ENTER FAX NUMBER'
_publ_contact_author_phone                        'ENTER PHONE NUMBER'
_publ_contact_letter
;
    ENTER TEXT OF LETTER
;
_publ_requested_journal                           'ENTER JOURNAL NAME HERE'
_publ_requested_category
                                               'CHOOSE FI FM FO CI CM CO or AD'
_publ_requested_coeditor_name                      ?

#==============================================================================
# TITLE AND AUTHOR LIST

_publ_section_title
;
    ENTER SECTION TITLE
;
_publ_section_title_footnote
;
    ENTER FOOTNOTE TO TITLE OF PAPER
;
loop_
_publ_author_name
_publ_author_footnote
_publ_author_address
' FIRST AUTHORS NAME '
;
  FIRST AUTHORS FOOTNOTES
;
;
  FIRST AUTHORS ADDRESS
;
_publ_section_synopsis
;
    ENTER SYNOPSIS
;

#==============================================================================
# TEXT

_publ_section_abstract
;
    ENTER ABSTRACT
;
_publ_section_comment
;
    ENTER TEXT
;
_publ_section_references
;
    ENTER OTHER REFERENCES

    Rigaku (2016). CrystalStructure. Version 4.2.1. 
    Rigaku Corporation, Tokyo, Japan.

    Burla, M. C., Caliandro, R., Camalli, M., Carrozzini, B., 
    Cascarano, G. L., Giacovazzo, C., Mallamo, M., Mazzone, A., 
    Polidori, G. and Spagna, R. 
    (2012). J. Appl. Cryst. 45, 357-361.
    SIR2011

    Sheldrick, G.M. (1997). SHELXL97. University of Gottingen, Germany.

    Rigaku Oxford Diffraction (2015), CrysAlisPro. version 1.171.39.3b.
    Rigaku Corporation, Tokyo, Japan

;
_publ_section_figure_captions
;
    ENTER FIGURE CAPTIONS
;
_publ_section_exptl_prep
;
    ENTER COMPOUND PREPARATION DETAILS
;
_publ_section_exptl_refinement
;
    ENTER SPECIAL DETAILS OF THE REFINEMENT
;

#==============================================================================
data_1_EindBF2

#==============================================================================
# CHEMICAL DATA

_chemical_formula_sum                             'C28 H45 B F2'
_chemical_formula_moiety                          'C28 H45 B F2'
_chemical_formula_weight                           430.47
_chemical_melting_point                            ?

#==============================================================================
# CRYSTAL DATA
_space_group_crystal_system                        monoclinic
_space_group_name_H-M_alt                         'C 1 2/c 1'
_space_group_name_Hall                            '-C 2yc'
_space_group_IT_number                             15
loop_
 _space_group_symop_operation_xyz
 'x, y, z'
 '-x, y, -z+1/2'
 'x+1/2, y+1/2, z'
 '-x+1/2, y+1/2, -z+1/2'
 '-x, -y, -z'
 'x, -y, z-1/2'
 '-x+1/2, -y+1/2, -z'
 'x+1/2, -y+1/2, z-1/2'
#------------------------------------------------------------------------------
_cell_length_a                                     20.1669(6)
_cell_length_b                                     8.6860(2)
_cell_length_c                                     15.4565(5)
_cell_angle_alpha                                  90.0000
_cell_angle_beta                                   111.566(3)
_cell_angle_gamma                                  90.0000
_cell_volume                                       2517.97(14)
_cell_formula_units_Z                              4
_cell_measurement_reflns_used                      13177
_cell_measurement_theta_min                        2.73
_cell_measurement_theta_max                        31.80
_cell_measurement_temperature                      100
#------------------------------------------------------------------------------
_exptl_crystal_description                         nONE
_exptl_crystal_colour                              nONE
_exptl_crystal_size_max                            0.200
_exptl_crystal_size_mid                            0.100
_exptl_crystal_size_min                            0.050
_exptl_crystal_density_diffrn                      1.135
_exptl_crystal_density_meas                        ?
_exptl_crystal_density_method                     'not measured'
_exptl_crystal_F_000                               944.00
_exptl_absorpt_coefficient_mu                      0.073
_exptl_absorpt_correction_type                     multi-scan
_exptl_absorpt_process_details
;
CrysAlisPro 1.171.39.3b (Rigaku Oxford Diffraction, 2015)
Empirical absorption correction using spherical harmonics,
 implemented in SCALE3 ABSPACK scaling algorithm.
;
_exptl_absorpt_correction_T_min                    0.717
_exptl_absorpt_correction_T_max                    0.996

#==============================================================================
# EXPERIMENTAL DATA

_diffrn_ambient_temperature                        100
_diffrn_radiation_type                            'Mo K\a'
_diffrn_radiation_wavelength                       0.71075
_diffrn_measurement_device_type                   'Rigaku XtaLAB P200'
_diffrn_measurement_method                         \w
_diffrn_detector_area_resol_mean                   5.811
_diffrn_reflns_number                              25806
_diffrn_reflns_av_R_equivalents                    0.0347
_diffrn_reflns_theta_max                           27.497
_diffrn_reflns_theta_min                           2.584
_diffrn_reflns_theta_full                          25.242
_diffrn_measured_fraction_theta_max                0.999
_diffrn_measured_fraction_theta_full               1.000
_diffrn_reflns_Laue_measured_fraction_max          0.999
_diffrn_reflns_Laue_measured_fraction_full         1.000
_diffrn_reflns_point_group_measured_fraction_max   0.999
_diffrn_reflns_point_group_measured_fraction_full  1.000
_diffrn_reflns_limit_h_min                        -26
_diffrn_reflns_limit_h_max                         26
_diffrn_reflns_limit_k_min                        -11
_diffrn_reflns_limit_k_max                         11
_diffrn_reflns_limit_l_min                        -20
_diffrn_reflns_limit_l_max                         18
_diffrn_standards_number                           0
_diffrn_standards_interval_count                   .
_diffrn_standards_decay_%                          ?
_reflns_number_total                               2892
_reflns_number_gt                                  2586
_reflns_threshold_expression                       F^2^>2.0\s(F^2^)
_reflns_Friedel_coverage          0.000
_reflns_Friedel_fraction_max      .
_reflns_Friedel_fraction_full     .

#==============================================================================
# REFINEMENT DATA

_refine_special_details
;
    Refinement was performed using all reflections. The weighted 
    R-factor (wR) and goodness of fit (S) are based on F^2^.
    R-factor (gt) are based on F. The threshold expression of
    F^2^ > 2.0 sigma(F^2^) is used only for calculating R-factor (gt).
;
_refine_ls_structure_factor_coef                   Fsqd
_refine_ls_R_factor_all                            0.0628
_refine_ls_R_factor_gt                             0.0580
_refine_ls_wR_factor_ref                           0.1551
_refine_ls_wR_factor_gt                            0.1509
_refine_ls_number_restraints                       0
_refine_ls_hydrogen_treatment                      constr
_refine_ls_number_reflns                           2892
_refine_ls_number_parameters                       146
_refine_ls_goodness_of_fit_ref                     1.028
_refine_ls_weighting_scheme                        calc
_refine_ls_weighting_details
           'w = 1/[\s^2^(Fo^2^)+(0.0823P)^2^+2.5359P] where P=(Fo^2^+2Fc^2^)/3'
_atom_sites_solution_hydrogens                     geom
_atom_sites_solution_primary                       direct
_atom_sites_solution_secondary                     difmap
_refine_ls_shift/su_max                            0.000
_refine_diff_density_max                           0.46
_refine_diff_density_min                          -0.35
_refine_ls_extinction_method                       none
_refine_ls_extinction_coef                         ?

loop_
_atom_type_symbol
_atom_type_description
_atom_type_scat_dispersion_real
_atom_type_scat_dispersion_imag
_atom_type_scat_source
  'C' 'C'  0.0033 0.0016 
;
International Tables for Crystallography
(Vol. C, Tables 4.2.6.8 and 6.1.1.4)
;
  'H' 'H'  0.0000 0.0000 
;
International Tables for Crystallography
(Vol. C, Table 6.1.1.4)
;
  'B' 'B'  0.0013 0.0007 
;
International Tables for Crystallography
(Vol. C, Tables 4.2.6.8 and 6.1.1.4)
;
  'F' 'F'  0.0171 0.0103 
;
International Tables for Crystallography
(Vol. C, Tables 4.2.6.8 and 6.1.1.4)
;

#==============================================================================
# ATOMIC COORDINATES AND THERMAL PARAMETERS

loop_
 _atom_site_label
 _atom_site_type_symbol
 _atom_site_fract_x
 _atom_site_fract_y
 _atom_site_fract_z
 _atom_site_U_iso_or_equiv
 _atom_site_adp_type
 _atom_site_occupancy
 _atom_site_site_symmetry_order  
 _atom_site_calc_flag
 _atom_site_refinement_flags_posn
 _atom_site_refinement_flags_adp
 _atom_site_refinement_flags_occupancy
 _atom_site_disorder_assembly
 _atom_site_disorder_group
F1 F 0.52283(5) 0.78670(11) 0.19488(6) 0.0408(3) Uani 1 1 d . . . . .
C1 C 0.5000 0.5237(2) 0.2500 0.0192(3) Uani 1 2 d S T P . .
C2 C 0.44838(5) 0.43902(15) 0.17879(8) 0.0190(3) Uani 1 1 d . . . . .
C3 C 0.38773(6) 0.50004(15) 0.09287(8) 0.0212(3) Uani 1 1 d . . . . .
C4 C 0.34285(6) 0.35238(15) 0.05484(8) 0.0214(3) Uani 1 1 d . . . . .
H4A H 0.3009 0.3508 0.0736 0.026 Uiso 1 1 calc R U . . .
H4B H 0.3257 0.3509 -0.0140 0.026 Uiso 1 1 calc R U . . .
C5 C 0.39048(6) 0.21041(16) 0.09511(9) 0.0248(3) Uani 1 1 d . . . . .
C6 C 0.44877(6) 0.27901(16) 0.17952(9) 0.0236(3) Uani 1 1 d . . . . .
C7 C 0.5000 0.1974(2) 0.2500 0.0306(4) Uani 1 2 d S T P . .
H7 H 0.5000 0.0880 0.2500 0.037 Uiso 1 2 calc R U P . .
C8 C 0.34366(8) 0.62715(18) 0.11539(10) 0.0354(4) Uani 1 1 d . . . . .
H8A H 0.3722 0.7230 0.1291 0.042 Uiso 1 1 calc R U . . .
H8B H 0.3008 0.6463 0.0591 0.042 Uiso 1 1 calc R U . . .
C9 C 0.31962(8) 0.5955(3) 0.19603(12) 0.0514(5) Uani 1 1 d . . . . .
H9A H 0.3615 0.5841 0.2535 0.062 Uiso 1 1 calc R U . . .
H9B H 0.2915 0.5005 0.1840 0.062 Uiso 1 1 calc R U . . .
H9C H 0.2904 0.6815 0.2027 0.062 Uiso 1 1 calc R U . . .
C10 C 0.41941(9) 0.5616(2) 0.02240(9) 0.0402(4) Uani 1 1 d . . . . .
H10A H 0.4548 0.6423 0.0535 0.048 Uiso 1 1 calc R U . . .
H10B H 0.4453 0.4764 0.0061 0.048 Uiso 1 1 calc R U . . .
C11 C 0.36602(14) 0.6286(3) -0.06767(11) 0.0756(9) Uani 1 1 d . . . . .
H11A H 0.3904 0.6519 -0.1105 0.091 Uiso 1 1 calc R U . . .
H11B H 0.3454 0.7233 -0.0538 0.091 Uiso 1 1 calc R U . . .
H11C H 0.3280 0.5537 -0.0965 0.091 Uiso 1 1 calc R U . . .
C12 C 0.35049(8) 0.07882(18) 0.12224(11) 0.0388(4) Uani 1 1 d . . . . .
H12A H 0.3105 0.0456 0.0657 0.047 Uiso 1 1 calc R U . . .
H12B H 0.3834 -0.0097 0.1438 0.047 Uiso 1 1 calc R U . . .
C13 C 0.32080(10) 0.1164(3) 0.19697(11) 0.0542(6) Uani 1 1 d . . . . .
H13A H 0.3594 0.1530 0.2529 0.065 Uiso 1 1 calc R U . . .
H13B H 0.2995 0.0236 0.2120 0.065 Uiso 1 1 calc R U . . .
H13C H 0.2843 0.1967 0.1742 0.065 Uiso 1 1 calc R U . . .
C14 C 0.42581(8) 0.1457(2) 0.02902(12) 0.0402(4) Uani 1 1 d . . . . .
H14A H 0.4565 0.2271 0.0188 0.048 Uiso 1 1 calc R U . . .
H14B H 0.4572 0.0592 0.0609 0.048 Uiso 1 1 calc R U . . .
C15 C 0.37522(9) 0.0889(3) -0.06602(12) 0.0504(5) Uani 1 1 d . . . . .
H15A H 0.3457 0.0050 -0.0574 0.060 Uiso 1 1 calc R U . . .
H15B H 0.4031 0.0515 -0.1020 0.060 Uiso 1 1 calc R U . . .
H15C H 0.3445 0.1738 -0.0995 0.060 Uiso 1 1 calc R U . . .
B1 B 0.5000 0.7051(3) 0.2500 0.0254(4) Uani 1 2 d S T P . .

loop_
 _atom_site_aniso_label
 _atom_site_aniso_U_11
 _atom_site_aniso_U_22
 _atom_site_aniso_U_33
 _atom_site_aniso_U_23
 _atom_site_aniso_U_13
 _atom_site_aniso_U_12
F1 0.0418(5) 0.0380(5) 0.0384(5) 0.0060(4) 0.0096(4) -0.0070(4)
C1 0.0110(7) 0.0298(9) 0.0159(7) 0.000 0.0038(6) 0.000
C2 0.0083(5) 0.0315(6) 0.0155(5) 0.0028(4) 0.0024(4) -0.0003(4)
C3 0.0135(5) 0.0319(7) 0.0137(5) 0.0042(5) -0.0004(4) -0.0034(5)
C4 0.0111(5) 0.0326(7) 0.0161(6) 0.0051(5) -0.0002(4) -0.0032(4)
C5 0.0111(5) 0.0315(7) 0.0228(6) 0.0006(5) -0.0044(4) -0.0037(5)
C6 0.0100(5) 0.0314(7) 0.0226(6) -0.0001(5) -0.0018(5) -0.0019(4)
C7 0.0152(8) 0.0294(9) 0.0334(10) 0.000 -0.0073(7) 0.000
C8 0.0205(6) 0.0388(8) 0.0315(8) -0.0020(6) -0.0085(6) 0.0072(5)
C9 0.0183(7) 0.0865(14) 0.0463(10) -0.0273(10) 0.0081(6) 0.0038(8)
C10 0.0422(8) 0.0574(10) 0.0172(6) 0.0024(6) 0.0066(6) -0.0297(8)
C11 0.0945(17) 0.0888(16) 0.0188(8) 0.0196(9) -0.0082(9) -0.0579(14)
C12 0.0236(7) 0.0350(8) 0.0363(8) 0.0137(6) -0.0142(6) -0.0113(6)
C13 0.0433(9) 0.0773(13) 0.0279(8) 0.0245(8) -0.0035(7) -0.0313(9)
C14 0.0168(6) 0.0512(10) 0.0431(9) -0.0217(7) -0.0001(6) -0.0022(6)
C15 0.0292(8) 0.0679(12) 0.0449(10) -0.0295(9) 0.0028(7) -0.0075(8)
B1 0.0142(8) 0.0331(11) 0.0199(9) 0.000 -0.0042(7) 0.000

#==============================================================================
_computing_data_collection
                                    'CrysAlisPro 1.171.39.3b (Rigaku OD, 2015)'
_computing_cell_refinement
                                    'CrysAlisPro 1.171.39.3b (Rigaku OD, 2015)'
_computing_data_reduction
                                    'CrysAlisPro 1.171.39.3b (Rigaku OD, 2015)'
_computing_structure_solution
                                                'SIR2011 (Burla, et al., 2012)'
_computing_structure_refinement                   'SHELXL97 (Sheldrick, 2008)'
_computing_publication_material
                                        'CrystalStructure 4.2.1 (Rigaku, 2016)'
_computing_molecular_graphics                     'CrystalStructure 4.2.1'

#==============================================================================
# MOLECULAR GEOMETRY

_geom_special_details
;
 All esds (except the esd in the dihedral angle between two l.s. planes)
 are estimated using the full covariance matrix.  The cell esds are taken
 into account individually in the estimation of esds in distances, angles
 and torsion angles; correlations between esds in cell parameters are only
 used when they are defined by crystal symmetry.  An approximate (isotropic)
 treatment of cell esds is used for estimating esds involving l.s. planes.
;

loop_
 _geom_bond_atom_site_label_1
 _geom_bond_atom_site_label_2
 _geom_bond_distance
 _geom_bond_site_symmetry_2
 _geom_bond_publ_flag
F1 B1 1.3146(15) . ?
C1 C2 1.4121(15) . ?
C1 C2 1.4121(15) 2_655 ?
C1 B1 1.576(3) . ?
C2 C6 1.3899(19) . ?
C2 C3 1.5318(15) . ?
C3 C8 1.535(2) . ?
C3 C10 1.5466(17) . ?
C3 C4 1.5552(17) . ?
C4 C5 1.5464(17) . ?
C4 H4A 0.9900 . ?
C4 H4B 0.9900 . ?
C5 C6 1.5204(16) . ?
C5 C12 1.5432(19) . ?
C5 C14 1.550(2) . ?
C6 C7 1.3891(16) . ?
C7 C6 1.3891(16) 2_655 ?
C7 H7 0.9500 . ?
C8 C9 1.519(3) . ?
C8 H8A 0.9900 . ?
C8 H8B 0.9900 . ?
C9 H9A 0.9800 . ?
C9 H9B 0.9800 . ?
C9 H9C 0.9800 . ?
C10 C11 1.528(2) . ?
C10 H10A 0.9900 . ?
C10 H10B 0.9900 . ?
C11 H11A 0.9800 . ?
C11 H11B 0.9800 . ?
C11 H11C 0.9800 . ?
C12 C13 1.519(3) . ?
C12 H12A 0.9900 . ?
C12 H12B 0.9900 . ?
C13 H13A 0.9800 . ?
C13 H13B 0.9800 . ?
C13 H13C 0.9800 . ?
C14 C15 1.530(2) . ?
C14 H14A 0.9900 . ?
C14 H14B 0.9900 . ?
C15 H15A 0.9800 . ?
C15 H15B 0.9800 . ?
C15 H15C 0.9800 . ?
B1 F1 1.3146(15) 2_655 ?

loop_
 _geom_angle_atom_site_label_1
 _geom_angle_atom_site_label_2
 _geom_angle_atom_site_label_3
 _geom_angle
 _geom_angle_site_symmetry_1
 _geom_angle_site_symmetry_3
 _geom_angle_publ_flag
C2 C1 C2 117.20(16) . 2_655 ?
C2 C1 B1 121.40(8) . . ?
C2 C1 B1 121.40(8) 2_655 . ?
C6 C2 C1 120.95(11) . . ?
C6 C2 C3 110.69(10) . . ?
C1 C2 C3 128.35(12) . . ?
C2 C3 C8 113.36(10) . . ?
C2 C3 C10 108.98(10) . . ?
C8 C3 C10 109.54(13) . . ?
C2 C3 C4 102.16(10) . . ?
C8 C3 C4 111.95(10) . . ?
C10 C3 C4 110.65(11) . . ?
C5 C4 C3 108.44(9) . . ?
C5 C4 H4A 110.0 . . ?
C3 C4 H4A 110.0 . . ?
C5 C4 H4B 110.0 . . ?
C3 C4 H4B 110.0 . . ?
H4A C4 H4B 108.4 . . ?
C6 C5 C12 111.94(11) . . ?
C6 C5 C4 101.70(10) . . ?
C12 C5 C4 112.99(10) . . ?
C6 C5 C14 108.06(10) . . ?
C12 C5 C14 108.86(13) . . ?
C4 C5 C14 113.08(12) . . ?
C7 C6 C2 121.14(12) . . ?
C7 C6 C5 126.19(13) . . ?
C2 C6 C5 112.62(10) . . ?
C6 C7 C6 118.61(18) . 2_655 ?
C6 C7 H7 120.7 . . ?
C6 C7 H7 120.7 2_655 . ?
C9 C8 C3 116.22(14) . . ?
C9 C8 H8A 108.2 . . ?
C3 C8 H8A 108.2 . . ?
C9 C8 H8B 108.2 . . ?
C3 C8 H8B 108.2 . . ?
H8A C8 H8B 107.4 . . ?
C8 C9 H9A 109.5 . . ?
C8 C9 H9B 109.5 . . ?
H9A C9 H9B 109.5 . . ?
C8 C9 H9C 109.5 . . ?
H9A C9 H9C 109.5 . . ?
H9B C9 H9C 109.5 . . ?
C11 C10 C3 115.99(15) . . ?
C11 C10 H10A 108.3 . . ?
C3 C10 H10A 108.3 . . ?
C11 C10 H10B 108.3 . . ?
C3 C10 H10B 108.3 . . ?
H10A C10 H10B 107.4 . . ?
C10 C11 H11A 109.5 . . ?
C10 C11 H11B 109.5 . . ?
H11A C11 H11B 109.5 . . ?
C10 C11 H11C 109.5 . . ?
H11A C11 H11C 109.5 . . ?
H11B C11 H11C 109.5 . . ?
C13 C12 C5 116.05(14) . . ?
C13 C12 H12A 108.3 . . ?
C5 C12 H12A 108.3 . . ?
C13 C12 H12B 108.3 . . ?
C5 C12 H12B 108.3 . . ?
H12A C12 H12B 107.4 . . ?
C12 C13 H13A 109.5 . . ?
C12 C13 H13B 109.5 . . ?
H13A C13 H13B 109.5 . . ?
C12 C13 H13C 109.5 . . ?
H13A C13 H13C 109.5 . . ?
H13B C13 H13C 109.5 . . ?
C15 C14 C5 116.36(12) . . ?
C15 C14 H14A 108.2 . . ?
C5 C14 H14A 108.2 . . ?
C15 C14 H14B 108.2 . . ?
C5 C14 H14B 108.2 . . ?
H14A C14 H14B 107.4 . . ?
C14 C15 H15A 109.5 . . ?
C14 C15 H15B 109.5 . . ?
H15A C15 H15B 109.5 . . ?
C14 C15 H15C 109.5 . . ?
H15A C15 H15C 109.5 . . ?
H15B C15 H15C 109.5 . . ?
F1 B1 F1 114.78(18) 2_655 . ?
F1 B1 C1 122.61(9) 2_655 . ?
F1 B1 C1 122.61(9) . . ?

loop_
 _geom_torsion_atom_site_label_1
 _geom_torsion_atom_site_label_2
 _geom_torsion_atom_site_label_3
 _geom_torsion_atom_site_label_4
 _geom_torsion
 _geom_torsion_site_symmetry_1
 _geom_torsion_site_symmetry_2
 _geom_torsion_site_symmetry_3
 _geom_torsion_site_symmetry_4
 _geom_torsion_publ_flag
C2 C1 C2 C6 0.10(8) 2_655 . . . ?
B1 C1 C2 C6 -179.89(8) . . . . ?
C2 C1 C2 C3 -178.66(12) 2_655 . . . ?
B1 C1 C2 C3 1.34(12) . . . . ?
C6 C2 C3 C8 132.41(12) . . . . ?
C1 C2 C3 C8 -48.72(15) . . . . ?
C6 C2 C3 C10 -105.32(13) . . . . ?
C1 C2 C3 C10 73.55(15) . . . . ?
C6 C2 C3 C4 11.78(13) . . . . ?
C1 C2 C3 C4 -169.35(9) . . . . ?
C2 C3 C4 C5 -20.00(12) . . . . ?
C8 C3 C4 C5 -141.61(11) . . . . ?
C10 C3 C4 C5 95.90(13) . . . . ?
C3 C4 C5 C6 20.39(13) . . . . ?
C3 C4 C5 C12 140.54(11) . . . . ?
C3 C4 C5 C14 -95.23(12) . . . . ?
C1 C2 C6 C7 -0.21(16) . . . . ?
C3 C2 C6 C7 178.75(9) . . . . ?
C1 C2 C6 C5 -177.99(9) . . . . ?
C3 C2 C6 C5 0.98(14) . . . . ?
C12 C5 C6 C7 48.15(17) . . . . ?
C4 C5 C6 C7 169.04(10) . . . . ?
C14 C5 C6 C7 -71.71(16) . . . . ?
C12 C5 C6 C2 -134.22(13) . . . . ?
C4 C5 C6 C2 -13.32(14) . . . . ?
C14 C5 C6 C2 105.92(13) . . . . ?
C2 C6 C7 C6 0.11(8) . . . 2_655 ?
C5 C6 C7 C6 177.56(14) . . . 2_655 ?
C2 C3 C8 C9 -47.62(16) . . . . ?
C10 C3 C8 C9 -169.58(12) . . . . ?
C4 C3 C8 C9 67.31(14) . . . . ?
C2 C3 C10 C11 -179.46(15) . . . . ?
C8 C3 C10 C11 -54.92(18) . . . . ?
C4 C3 C10 C11 68.96(19) . . . . ?
C6 C5 C12 C13 52.77(16) . . . . ?
C4 C5 C12 C13 -61.33(15) . . . . ?
C14 C5 C12 C13 172.16(12) . . . . ?
C6 C5 C14 C15 -172.77(15) . . . . ?
C12 C5 C14 C15 65.45(19) . . . . ?
C4 C5 C14 C15 -61.00(19) . . . . ?
C2 C1 B1 F1 103.81(7) . . . 2_655 ?
C2 C1 B1 F1 -76.19(7) 2_655 . . 2_655 ?
C2 C1 B1 F1 -76.19(7) . . . . ?
C2 C1 B1 F1 103.81(7) 2_655 . . . ?

#==============================================================================

#==============================================================================
# Additional structures and associated data_? identifiers
# should be added at this point if there is more than one 
# structure analysis in the CIF.

_shelxl_version_number 2013-4

_shelx_res_file
;
TITL EindBF2
CELL  0.71075 20.16690 8.68600 15.45650 90.00000 111.56600 90.00000
ZERR  4 0.00060 0.00020 0.00050 0.00000 0.00300 0.00000
LATT 7
SYMM    -X,    +Y, .50-Z
SFAC C H B F
UNIT 112 180 4 8
SHEL 8.147145 0.769625
L.S. 10
FMAP 2
PLAN 25
WPDB -2
HTAB
BOND $H
CONF
LIST 4
TEMP -173.0
ACTA
SIZE 0.050 0.100 0.200
WGHT    0.082300    2.535900
FVAR       1.06033
F1    4    0.522835    0.786701    0.194883    11.00000    0.04176    0.03798 =
         0.03844    0.00595    0.00964   -0.00701
C1    1    0.500000    0.523716    0.250000    10.50000    0.01103    0.02980 =
         0.01585    0.00000    0.00379    0.00000
C2    1    0.448379    0.439019    0.178795    11.00000    0.00832    0.03155 =
         0.01555    0.00285    0.00241   -0.00029
C3    1    0.387730    0.500036    0.092874    11.00000    0.01354    0.03186 =
         0.01373    0.00419   -0.00036   -0.00335
C4    1    0.342845    0.352376    0.054843    11.00000    0.01109    0.03256 =
         0.01613    0.00508   -0.00021   -0.00321
AFIX  23
H4A   2    0.300905    0.350770    0.073611    11.00000   -1.20000
H4B   2    0.325666    0.350873   -0.013954    11.00000   -1.20000
AFIX   0
C5    1    0.390482    0.210409    0.095108    11.00000    0.01107    0.03151 =
         0.02283    0.00056   -0.00437   -0.00371
C6    1    0.448774    0.279013    0.179516    11.00000    0.01000    0.03144 =
         0.02262   -0.00007   -0.00185   -0.00186
C7    1    0.500000    0.197383    0.250000    10.50000    0.01522    0.02944 =
         0.03339    0.00000   -0.00727    0.00000
AFIX  43
H7    2    0.499999    0.088012    0.250000    10.50000   -1.20000
AFIX   0
C8    1    0.343660    0.627150    0.115392    11.00000    0.02047    0.03882 =
         0.03152   -0.00197   -0.00852    0.00717
AFIX  23
H8A   2    0.372247    0.722964    0.129088    11.00000   -1.20000
H8B   2    0.300777    0.646313    0.059063    11.00000   -1.20000
AFIX   0
C9    1    0.319621    0.595531    0.196035    11.00000    0.01832    0.08651 =
         0.04631   -0.02732    0.00814    0.00376
AFIX 137
H9A   2    0.361493    0.584134    0.253500    11.00000   -1.20000
H9B   2    0.291468    0.500516    0.183968    11.00000   -1.20000
H9C   2    0.290395    0.681549    0.202654    11.00000   -1.20000
AFIX   0
C10   1    0.419408    0.561587    0.022405    11.00000    0.04219    0.05737 =
         0.01720    0.00239    0.00656   -0.02969
AFIX  23
H10A  2    0.454831    0.642267    0.053513    11.00000   -1.20000
H10B  2    0.445285    0.476395    0.006099    11.00000   -1.20000
AFIX   0
C11   1    0.366016    0.628634   -0.067672    11.00000    0.09451    0.08876 =
         0.01880    0.01956   -0.00823   -0.05794
AFIX 137
H11A  2    0.390417    0.651905   -0.110489    11.00000   -1.20000
H11B  2    0.345437    0.723314   -0.053761    11.00000   -1.20000
H11C  2    0.327951    0.553682   -0.096537    11.00000   -1.20000
AFIX   0
C12   1    0.350488    0.078821    0.122237    11.00000    0.02362    0.03500 =
         0.03635    0.01365   -0.01422   -0.01130
AFIX  23
H12A  2    0.310500    0.045559    0.065660    11.00000   -1.20000
H12B  2    0.383423   -0.009653    0.143816    11.00000   -1.20000
AFIX   0
C13   1    0.320800    0.116362    0.196974    11.00000    0.04327    0.07734 =
         0.02792    0.02453   -0.00346   -0.03133
AFIX 137
H13A  2    0.359410    0.153004    0.252923    11.00000   -1.20000
H13B  2    0.299489    0.023644    0.211983    11.00000   -1.20000
H13C  2    0.284348    0.196655    0.174231    11.00000   -1.20000
AFIX   0
C14   1    0.425809    0.145703    0.029022    11.00000    0.01682    0.05117 =
         0.04313   -0.02171   -0.00008   -0.00221
AFIX  23
H14A  2    0.456503    0.227098    0.018782    11.00000   -1.20000
H14B  2    0.457245    0.059181    0.060929    11.00000   -1.20000
AFIX   0
C15   1    0.375224    0.088880   -0.066018    11.00000    0.02915    0.06788 =
         0.04489   -0.02946    0.00280   -0.00751
AFIX 137
H15A  2    0.345749    0.004963   -0.057418    11.00000   -1.20000
H15B  2    0.403063    0.051497   -0.102039    11.00000   -1.20000
H15C  2    0.344456    0.173781   -0.099478    11.00000   -1.20000
AFIX   0
B1    3    0.500000    0.705136    0.250000    10.50000    0.01420    0.03308 =
         0.01990    0.00000   -0.00419    0.00000
HKLF 4

REM  EindBF2
REM R1 =  0.0580 for    2586 Fo > 4sig(Fo)  and  0.0628 for all    2892 data
REM    146 parameters refined using      0 restraints

END

WGHT      0.0823      2.5359

REM No hydrogen bonds found for HTAB generation

REM Highest difference peak  0.460,  deepest hole -0.350,  1-sigma level  0.061
Q1    1   0.3921  0.5763 -0.0571  11.00000  0.05    0.38
Q2    1   0.5000  0.6128  0.2500  10.50000  0.05    0.37
Q3    1   0.3717  0.6954 -0.0826  11.00000  0.05    0.35
Q4    1   0.3661  0.1552  0.1146  11.00000  0.05    0.31
Q5    1   0.3997  0.5403  0.0558  11.00000  0.05    0.27
Q6    1   0.4196  0.4794  0.1402  11.00000  0.05    0.26
Q7    1   0.4009  0.1263 -0.0216  11.00000  0.05    0.25
Q8    1   0.3635  0.4333  0.0686  11.00000  0.05    0.25
Q9    1   0.4087  0.1861  0.0597  11.00000  0.05    0.24
Q10   1   0.4197  0.2396  0.1405  11.00000  0.05    0.23
Q11   1   0.4476  0.3570  0.1845  11.00000  0.05    0.23
Q12   1   0.3679  0.5696  0.1064  11.00000  0.05    0.22
Q13   1   0.4221  0.5967 -0.1095  11.00000  0.05    0.22
Q14   1   0.3692  0.2801  0.0753  11.00000  0.05    0.21
Q15   1   0.4722  0.2392  0.2171  11.00000  0.05    0.21
Q16   1   0.4717  0.4872  0.2157  11.00000  0.05    0.21
Q17   1   0.5222  0.9443  0.1888  11.00000  0.05    0.20
Q18   1   0.4267  0.0968  0.0523  11.00000  0.05    0.20
Q19   1   0.4017 -0.0245 -0.0847  11.00000  0.05    0.19
Q20   1   0.2861  0.0861  0.2288  11.00000  0.05    0.18
Q21   1   0.5000  0.0219  0.2500  10.50000  0.05    0.18
Q22   1   0.3831  0.7470  0.0919  11.00000  0.05    0.18
Q23   1   0.2893  0.6087  0.2096  11.00000  0.05    0.17
Q24   1   0.2976  0.7513  0.1880  11.00000  0.05    0.15
Q25   1   0.3373  0.2033  0.2643  11.00000  0.05    0.15
;

_shelx_res_checksum   27685

_shelx_hkl_file
;
  -2   0   1    0.05    0.56
  -2   0   1   -0.22    0.37
  -2   0   0    0.74    0.55
   1   1   0 7869.30   11.64
  -1  -1   0 7791.22   11.10
  -1   1   0 7716.67   11.71
   1  -1   0 7664.72   11.29
  -1  -1   1 4337.28  119.82
  -1   1   1 2816.74  119.72
   1   1  -1 4478.49  119.81
   1  -1  -1 1381.76  119.59
  -1   1   1 5641.39  120.00
  -1   1   1 5822.09  119.88
   0   0   2    6.44    1.21
   0   0   2    3.68    1.55
   2   0  -258690.60 2305.00
   2   0  -251122.20 2305.07
  -2   0  -1    0.03    1.04
   2   0   1    0.86    1.36
   2   0   1    2.00    0.93
   1   1   1 1284.04   48.04
  -1  -1  -1 1254.06   48.04
   1  -1   1 1293.98   48.01
   1   1   1 1207.88   48.10
  -1   1  -1 1294.45   48.25
   1  -1   1 1278.25   48.10
   1  -1   1 1279.48   48.12
  -1  -1  -1 1196.85   48.10
  -1   1  -1 1264.72   48.01
  -1  -1  -1 1281.59   48.19
  -1   1  -1 1262.36   48.01
   1   1   1 1254.34   48.12
  -1   1  -1 1139.75   48.08
   1  -1   1 1298.48   48.00
  -1  -1   2 2122.82   77.04
   1   1  -2 2039.44   77.02
   1  -1  -2 1921.63   76.92
  -1   1   2 2015.41   77.09
  -1   1   2 2027.59   77.03
  -1  -1   2 2013.36   77.17
   3  -1  -1  894.22   37.13
  -3  -1   1  939.11   36.94
  -3  -1   1  958.57   36.97
   3  -1  -1  951.65   37.18
   3   1  -1  794.61   37.02
   3  -1  -1 1097.23   37.01
  -3  -1   1 1029.37   37.16
  -3  -1   1  943.23   37.03
  -3   1   1 1012.61   36.93
   3   1  -1 1013.25   36.96
  -3   1   1  992.76   37.19
   3   1  -1  973.78   36.99
   3   1  -1  978.52   37.06
   3  -1  -1  979.32   37.13
  -3   1   1  881.94   37.03
   3  -1  -1 1018.57   37.07
   3  -1  -1  937.01   37.04
   3   1  -1  948.06   37.20
   3   1  -1  973.32   37.15
  -3   1   1  988.37   37.06
   2   0  -3    0.72    1.52
   2   0  -3    0.11    1.57
  -2   0   3    0.36    1.47
  -2   0   3   -1.11    1.92
   2   0  -3   -0.81    1.90
   2   0  -3    0.11    1.52
  -3   1   0   70.52    3.65
  -3  -1   0   72.24    3.46
   3  -1   0   67.84    3.62
  -3   1   0   74.67    3.41
   3  -1   0   69.49    3.58
   3  -1   0   79.80    3.54
  -3   1   0   65.22    3.77
  -3  -1   0   70.56    3.47
  -3   1   0   78.37    3.69
   3   1   0   69.03    3.49
   3  -1   0   70.79    3.93
   3   1   0   75.47    3.60
   3   1   0   71.54    3.71
  -3  -1   0   71.88    3.62
   3   1   0   73.38    3.49
   3  -1   0   72.79    3.73
   3  -1   0   70.87    3.44
  -3  -1   0   75.51    3.48
   3   1   0   66.77    3.62
  -3   1   0   68.52    3.61
   4   0  -1    1.22    1.48
  -4   0   1    0.93    1.68
  -4   0   1   -0.20    1.77
   4   0  -1   -1.44    1.94
   1  -1   2 1814.35   66.18
  -1  -1  -2 1760.45   66.20
   1   1   2 1677.48   66.05
   1   1   2 1632.17   66.20
  -1  -1  -2 1740.17   66.05
  -1   1  -2 1671.57   66.04
   1  -1   2 1718.98   66.25
  -1   1  -2 1700.60   66.24
  -1  -1  -2 1793.55   66.27
   1   1   2 1729.89   66.25
   1  -1   2 1802.01   66.05
  -1   1  -2 1784.57   66.17
   2   0   224614.20  940.08
  -2   0  -225262.20  940.07
   2   0   223959.70  940.29
  -3  -1   2 9350.25  363.19
  -3  -1   2 8628.86  363.21
  -3  -1   2 8955.48  363.36
   3   1  -2 9718.90  363.34
   3  -1  -2 9607.43  363.29
  -3   1   2 9812.97  363.30
  -3   1   210501.10  363.36
   3  -1  -2 9964.25  363.33
   3   1  -2 9621.99  363.23
   3   1  -2 9716.64  363.17
  -4   0   247458.50 1764.92
   4   0  -248942.00 1764.81
  -4   0   247684.70 1764.83
  -4   0   247709.00 1764.83
   0   0  -3   -0.29    1.96
   0   0   3    0.10    0.96
   0   0   3    0.40    1.60
   0   0  -3    1.53    2.14
   0   0  -3   -0.08    0.92
   0   0  -3   -0.65    0.96
  -4   0   033148.10 1310.75
   4   0   033572.10 1310.64
  -4   0   035635.90 1310.62
   4   0   035261.10 1310.70
   1  -1  -3 3252.15  120.31
   1  -1  -3 3358.97  120.04
  -1   1   3 3169.51  120.05
  -1   1   3 3432.82  120.19
   1   1  -3 3215.60  120.01
   1   1  -3 3237.45  120.15
   1  -1  -3 3305.70  120.15
  -1  -1   3 3499.50  120.20
  -1  -1   3 3456.98  120.05
   3   1   114253.70  535.90
  -3   1  -114428.30  535.77
  -3   1  -114090.50  536.06
  -3  -1  -114094.10  535.88
   3  -1   114712.20  535.77
   3  -1   114044.60  535.76
   3   1   113903.40  535.94
  -3  -1  -113437.90  535.91
  -3   1  -114779.10  536.02
   3  -1   113885.30  535.68
   3  -1   114867.40  536.07
   3   1   113761.50  535.76
  -3   1  -114266.90  535.78
   3   1   114002.50  535.71
  -3   1  -114169.00  535.70
   3  -1   113628.10  535.88
   3  -1   113649.10  536.03
  -3  -1  -113760.80  535.78
   0   2   0   25.43    2.57
   0   2   0   20.75    2.15
   0  -2   0   26.84    2.30
   0  -2   0   23.95    2.31
   4   0  -3    1.58    2.18
  -4   0   3   -0.78    1.43
   4   0  -3    2.36    1.73
   4   0  -3    3.42    1.22
  -4   0   3    1.44    1.24
  -4   0   3   -0.37    2.12
  -3   1   3 4252.41  162.57
  -3  -1   3 3941.20  162.52
   3   1  -3 4103.89  162.29
   3   1  -3 4462.70  162.55
  -3  -1   3 4076.25  162.60
  -3  -1   3 4122.67  162.29
   3  -1  -3 4580.84  162.41
  -3   1   3 4359.19  162.50
  -3   1   3 4609.53  162.42
   3  -1  -3 4142.50  162.44
   3   1  -3 4312.22  162.35
   0   2   1 6114.36  139.25
   0   2   1 5604.17  139.12
   0  -2  -1 5713.02  139.23
   0   2  -1 5751.95  139.04
   0  -2  -1 5669.72  139.11
   0  -2   1 5691.45  139.21
   0  -2   1 5969.47  139.03
  -4   0  -1    2.51    1.87
   4   0   1    0.66    2.18
   4   0   1    1.56    1.69
  -4   0  -1    0.74    1.80
  -4   0  -1   -1.61    2.34
  -2   2   1 9356.63  336.95
  -2  -2   1 9212.71  336.85
  -2  -2   1 9184.16  337.01
  -2   2   1 9473.43  337.06
   2  -2  -1 9173.41  337.04
   2   2  -1 9123.32  336.98
   2   2  -1 8576.19  337.03
  -2   2   1 8081.87  337.00
   2  -2   0 4098.06  159.67
  -2   2   0 3888.97  159.73
   2   2   0 4313.36  159.73
   2   2   0 4204.17  159.76
  -2   2   0 4304.02  159.70
  -2  -2   0 4179.91  159.76
  -2  -2   0 4264.07  159.66
   2   2   0 4418.68  159.70
   2  -2   0 4136.45  159.75
  -2  -2   0 4095.85  159.71
  -2   2   0 4148.64  159.71
   2   0  -419201.80  713.48
   2   0  -419023.90  713.28
  -2   0   418515.40  713.29
   2   0  -418782.60  713.27
   2   0  -418419.90  713.22
   1   1   3 5242.04  193.65
  -1  -1  -3 5347.25  193.61
   1  -1   3 5377.22  193.51
  -1  -1  -3 4780.99  193.43
   1   1   3 4631.78  193.39
   1   1   3 5301.46  193.80
  -1   1  -3 5429.19  193.49
  -1  -1  -3 4958.10  193.76
  -1   1  -3 5263.08  193.57
  -1  -1  -3 4892.30  193.40
   1  -1   3 5179.46  193.75
   1  -1   3 5367.66  193.60
  -1   1  -3 5546.06  193.75
  -2   0  -3    2.12    1.98
  -2   0  -3   -0.17    2.54
   2   0   3    2.09    2.84
   2   0   3   -1.03    2.11
   2   0   3   -0.38    0.86
   2   0   3   -1.11    1.69
   0   2   2 3522.47  133.00
   0   2  -2 3623.83  132.94
   0   2   2 3261.46  132.84
   0  -2   2 3652.00  133.13
   0   2  -2 3440.23  133.16
   0  -2  -2 3532.23  133.01
   0  -2   2 3519.56  132.94
   0   2   2 3327.48  133.14
   0   2  -2 3426.58  133.10
   0  -2   2 3745.96  133.24
  -2   2   2 2407.44   93.56
  -2  -2   2 2490.09   93.44
  -2  -2   2 2525.27   93.73
  -2  -2   2 2299.69   93.81
   2  -2  -2 2484.17   93.66
  -2   2   2 2494.90   93.81
   2   2  -2 2440.61   93.67
  -2   2   2 2528.25   93.75
   2  -2  -2 2411.91   93.70
   2   2  -2 2440.73   93.68
   2  -2  -2 2401.51   93.76
  -3  -1  -2   92.72    4.63
   3   1   2   78.46    4.24
   3  -1   2   98.79    4.00
   3  -1   2   88.67    3.71
  -3   1  -2   72.25    4.83
  -3  -1  -2   89.15    3.94
  -3   1  -2   95.27    3.94
   3  -1   2   90.53    3.98
   3  -1   2   91.57    4.42
   3   1   2   87.61    3.74
  -3   1  -2   74.39    4.99
  -3  -1  -2   87.55    4.60
   3   1   2   83.56    4.04
   3   1   2   89.87    4.68
  -3   1  -2   79.78    4.40
  -3   1  -2   88.04    4.02
   3   1   2   84.88    4.10
   2  -2   162269.30 2351.08
  -2  -2  -162411.50 2351.01
  -2   2  -158242.90 2351.07
   2  -2   162695.60 2350.93
  -2   2  -163288.90 2351.18
   2   2   160836.90 2351.11
   2  -2   162047.60 2350.96
  -2   2  -161176.70 2351.34
  -2  -2  -162921.90 2351.19
   2   2   161208.40 2351.03
   2   2   160792.80 2351.21
  -2   2  -161969.70 2350.98
  -2  -2  -163108.40 2351.06
   2   2   162337.30 2351.14
   2  -2   164217.90 2351.31
  -2  -2  -162027.20 2351.11
   2   2   161824.40 2351.04
   2   2   160533.60 2350.89
   5   1  -1  518.48   20.95
  -5   1   1  546.57   20.94
  -5  -1   1  524.94   20.94
   5  -1  -1  565.03   21.17
  -5   1   1  476.69   21.19
  -5  -1   1  525.00   21.16
   5   1  -1  518.77   21.02
   5   1  -1  539.74   21.13
  -5   1   1  565.43   21.12
   5  -1  -1  561.11   21.02
  -5   1   1  588.15   20.98
   5  -1  -1  547.06   21.13
  -5  -1   1  556.57   20.89
   5  -1  -1  493.30   21.12
  -5  -1   1  531.61   21.05
   5   1  -2 1385.19   52.06
   5   1  -2 1281.46   51.76
   5  -1  -2 1386.98   52.20
  -5   1   2 1348.19   51.99
   5   1  -2 1365.76   51.85
  -5  -1   2 1433.16   52.04
  -5   1   2 1429.66   51.91
   5  -1  -2 1453.47   52.03
  -5   1   2 1455.06   52.20
   5   1  -2 1122.73   52.05
  -5  -1   2 1385.50   51.84
  -5  -1   2 1289.11   52.01
   5   1  -2 1287.18   52.06
   5  -1  -2 1363.52   52.19
  -5  -1   2 1357.58   51.75
   5  -1  -2 1410.38   51.93
   0   0  -4    2.23    1.04
   0   0  -4    4.32    2.21
   0   0   4    2.80    1.18
   0   0  -4    1.83    1.09
   0   0   4    4.28    1.89
   0   0  -4    3.22    2.77
  -4   0   4 4472.11  158.15
   4   0  -4 4339.50  158.16
   4   0  -4 4342.36  158.02
   4   0  -4 4445.12  158.09
   1  -1  -4  113.07    5.15
   1  -1  -4  108.81    4.65
  -1  -1   4  109.59    4.75
   1   1  -4   95.66    4.49
   1  -1  -4  101.19    5.24
  -1  -1   4  113.66    4.55
  -1   1   4  109.31    5.02
  -1  -1   4   84.19    5.43
   1  -1  -4   94.09    4.13
   1   1  -4  106.38    4.53
   1   1  -4   50.86    5.31
  -1   1   4  110.85    4.61
  -1   1   4  103.64    4.79
   1  -1  -4  104.06    4.59
   3   1  -4   98.99    4.53
   3   1  -4   72.78    3.45
   3  -1  -4   82.06    4.18
   3  -1  -4   78.13    4.01
   3   1  -4   85.91    3.46
  -3  -1   4   84.36    4.56
  -3   1   4   85.48    4.11
  -3   1   4   67.81    3.51
   3   1  -4   76.20    3.98
   3  -1  -4   86.24    3.76
   3   1  -4   92.06    4.47
   5  -1   0    1.73    2.05
   5  -1   0   -1.23    2.69
  -5   1   0   -0.52    2.43
  -5   1   0   -0.71    2.01
  -5  -1   0    0.22    2.17
  -5   1   0    1.05    2.45
  -5   1   0   -0.38    2.22
   5  -1   0    0.66    1.98
  -5  -1   0    4.58    2.26
   5   1   0   -0.33    2.33
  -5  -1   0    2.12    2.14
   5   1   0    0.96    1.82
  -4   0  -262202.70 2393.14
  -4   0  -262924.70 2393.23
   4   0   263047.80 2393.16
   4   0   263653.30 2393.22
  -5   1   3 8541.25  323.29
   5  -1  -3 8353.85  323.50
   5  -1  -3 8900.92  323.30
   5  -1  -3 8559.88  323.28
   5   1  -3 8555.18  323.38
   5   1  -3 8990.51  323.41
  -5  -1   3 8558.90  323.38
   5   1  -3 7841.33  323.14
  -5   1   3 8210.43  323.28
  -5  -1   3 8679.27  323.44
  -5   1   3 9268.02  323.56
  -6   0   233089.30 1270.85
   6   0  -233627.60 1270.75
  -6   0   233212.30 1270.47
   6   0  -233834.10 1270.85
  -6   0   233614.10 1270.86
   6   0  -1   -1.32    1.75
  -6   0   1    3.56    2.20
  -6   0   1   -1.23    2.04
   6   0  -1   -1.80    2.38
  -2   2   3  212.05    8.72
  -2  -2   3  201.75    8.49
   2   2  -3  208.79    8.51
   2   2  -3  212.63    8.57
  -2  -2   3  203.26    8.78
  -2   2   3  180.43    8.43
   2  -2  -3  210.42    8.46
   2  -2  -3  199.21    8.63
  -2   2   3  213.63    8.09
  -2   2   3  210.58    8.55
  -2  -2   3  201.66    8.59
  -2  -2   3  195.19    7.97
   4  -2  -1   78.51    4.25
  -4  -2   1   71.00    3.94
   4   2  -1   76.95    4.51
   4  -2  -1   84.41    4.08
   4   2  -1   78.11    4.10
   4   2  -1   78.41    3.64
   4  -2  -1   82.96    4.22
  -4   2   1   74.05    4.07
   4  -2  -1   86.09    3.98
  -4   2   1   81.81    4.10
  -4  -2   1   78.65    4.28
   4   2  -1   78.46    3.96
  -4  -2   1   81.81    4.40
  -4   2   1   76.80    3.80
  -4  -2   1   76.36    3.74
  -4  -2   1   87.99    3.92
   4   2  -1   84.12    4.27
  -4  -2   1   72.79    3.99
  -4   2   1   73.75    4.02
   4  -2  -1   73.88    4.07
  -4   2   1   90.60    4.24
   4   2  -1   84.02    4.12
   4   2  -1   75.27    4.09
   2   2   2 8220.50  309.33
   2   2   2 7739.69  309.07
  -2  -2  -2 8005.02  309.37
   2  -2   2 8206.59  309.35
  -2  -2  -2 7924.39  309.21
   2   2   2 8111.88  309.39
  -2  -2  -2 8096.18  309.59
  -2   2  -2 8325.91  309.38
  -2  -2  -2 8277.82  309.36
  -2   2  -2 8229.70  309.16
   2  -2   2 8632.09  309.92
   2   2   2 8305.10  309.21
  -2  -2  -2 7952.19  309.10
   2  -2   2 8181.23  309.14
  -2   2  -2 8056.29  309.57
   2  -2   2 8085.28  309.37
   2   2   2 8331.35  309.51
  -2   2  -2 8277.08  309.78
  -2  -2  -2 8307.18  309.50
   2  -2   2 8138.51  309.14
  -2   2  -2 8077.92  309.17
   4  -2  -2  840.24   32.46
  -4   2   2  855.62   32.33
   4  -2  -2  852.90   32.38
  -4   2   2  781.65   32.08
  -4  -2   2  832.01   31.98
  -4   2   2  850.52   32.10
  -4  -2   2  850.94   32.18
   4   2  -2  851.34   32.20
  -4  -2   2  829.24   32.21
   4   2  -2  853.54   32.20
  -4  -2   2  822.46   32.49
   4   2  -2  751.74   32.47
   4   2  -2  829.77   32.51
  -4  -2   2  814.78   32.53
   4  -2  -2  847.36   32.15
   4  -2  -2  836.90   32.12
   4   2  -2  885.34   32.53
  -4   2   2  840.77   32.36
   0  -2  -3 2480.59   92.68
   0   2   3 2413.26   92.51
   0  -2  -3 2117.79   92.75
   0   2   3 2416.05   92.69
   0  -2  -3 2411.99   92.50
   0  -2  -3 2411.77   92.45
   0   2   3 2404.52   92.45
   0  -2   3 2329.49   92.50
   0   2  -3 2454.24   92.81
   0  -2   3 2522.86   92.70
   0   2  -3 2566.08   92.44
   0   2  -3 2487.46   92.68
   6   0  -3    0.65    2.14
   6   0  -3    0.62    2.65
  -6   0   3    2.22    1.11
  -6   0   3    0.52    2.14
  -6   0   3    0.42    2.48
   6   0  -3   -0.07    1.93
  -4   2   0 8436.47  307.27
   4  -2   0 7918.23  307.38
  -4  -2   0 8352.89  307.26
  -4   2   0 7620.08  307.29
  -4   2   0 7956.79  307.22
  -4   2   0 8000.17  307.40
   4   2   0 7720.45  307.16
   4  -2   0 8185.73  307.26
  -4  -2   0 7983.59  307.44
  -4  -2   0 7641.67  307.20
   4  -2   0 8043.91  307.26
   4   2   0 7788.07  307.33
   4   2   0 8263.05  307.30
   4  -2   0 7869.67  307.19
  -4  -2   0 8032.71  307.37
   4  -2   0 8776.03  307.53
  -4  -2   0 7900.06  307.27
  -4   2   0 7900.41  307.30
   4   2   0 8305.88  307.27
  -4   2   0 9711.36  307.48
   4   2   0 7897.07  307.28
  -4  -2   0 7963.12  307.19
   4   2   0 7878.36  307.20
   4  -2   0 8267.50  307.45
  -4  -2   0 8062.79  307.26
  -6   0   023408.40  863.53
  -6   0   023628.10  863.71
  -6   0   021471.60  863.60
   6   0   023141.80  863.60
   6   0   023037.20  863.63
   6   0   021435.40  863.67
   5   1   1 7634.44  293.17
   5  -1   1 7688.49  292.94
   5  -1   1 7732.07  293.34
  -5   1  -1 8011.67  293.27
   5  -1   1 7767.67  292.90
  -5   1  -1 7695.61  293.30
  -5  -1  -1 7533.65  293.11
   5   1   1 7467.54  293.03
   5  -1   1 7703.23  293.02
   5   1   1 7215.03  293.22
  -5  -1  -1 7858.34  293.08
  -5   1  -1 7960.68  293.04
  -1   1  -4 1534.09   58.80
   1   1   4 1483.22   58.91
  -1  -1  -4 1445.77   58.91
   1  -1   4 1630.24   58.89
   1   1   4 1588.15   58.66
  -1   1  -4 1510.81   58.55
  -1  -1  -4 1517.02   58.60
   1  -1   4 1605.85   58.60
   1   1   4 1461.37   58.94
  -1   1  -4 1502.79   58.52
   2   0  -5   -0.07    2.14
   2   0  -5    0.58    1.54
   2   0  -5    2.77    2.02
   2   0  -5    0.79    3.05
  -2   0   5    2.02    2.02
   3  -1   3  881.67   33.19
  -3   1  -3  883.48   33.20
   3   1   3  807.07   33.26
  -3   1  -3  878.12   33.28
  -3   1  -3  856.43   33.53
  -3  -1  -3  840.78   33.26
   3  -1   3  897.99   33.28
   3  -1   3  893.47   33.59
   3   1   3  878.66   33.68
  -3   1  -3  867.71   34.07
  -3  -1  -3  856.61   33.63
   3   1   3  859.28   32.98
   3   1   3  857.68   33.28
  -3  -1  -3  838.80   33.48
   5   1  -4 7178.58  276.96
   5  -1  -4 7533.54  276.93
   5  -1  -4 7188.10  276.83
  -5   1   4 7476.57  276.97
  -5   1   4 7506.61  277.28
   5  -1  -4 8729.78  277.55
  -5  -1   4 7253.40  277.09
  -5  -1   4 7272.95  276.96
   5   1  -4 5864.21  277.04
   5  -1  -4 7245.39  277.07
   5   1  -4 7054.17  277.04
   5   1  -4 7291.03  276.76
  -5  -1   4 7278.74  277.26
  -5   1   4 7757.17  277.13
   4  -2  -336493.10 1330.77
   4  -2  -333163.90 1330.47
  -4   2   336276.90 1330.75
  -4   2   335822.30 1330.66
   4  -2  -336001.90 1330.80
   4   2  -333494.80 1330.47
  -4  -2   335231.30 1330.64
   4   2  -336078.60 1330.80
   4   2  -334781.60 1330.91
  -4  -2   333278.70 1330.46
   4  -2  -335579.60 1330.66
   4   2  -336391.10 1330.58
  -4  -2   336516.70 1330.90
   2   0   4 2934.59  112.75
  -2   0  -4 2958.94  113.06
  -2   0  -4 2863.73  113.25
  -2   0  -4 3020.82  113.49
   2   0   4 2934.51  113.49
   2   0   4 3152.23  113.37
   4   0  -5    3.37    2.34
  -4   0   5    1.02    2.25
   4   0  -5    0.11    1.83
  -4   0   5    2.07    2.07
   4   0  -5    0.21    2.01
   4   0  -5   -1.63    1.93
  -4   2  -1 1541.34   57.39
  -4   2  -1 1487.59   57.50
   4  -2   1 1538.56   57.20
   4  -2   1 1535.35   57.77
  -4   2  -1 1442.85   57.21
   4  -2   1 1523.47   57.48
   4  -2   1 1516.02   57.71
  -4   2  -1 1492.76   57.52
   4  -2   1 1515.39   57.26
  -4   2  -1 1548.37   57.65
  -4   2  -1 1490.91   57.25
   4  -2   1 1509.79   57.33
   4   2   1 1561.22   57.28
  -4  -2  -1 1441.76   57.38
   4   2   1 1522.43   57.45
   4   2   1 1569.59   57.24
  -4  -2  -1 1368.76   57.17
   4   2   1 1446.28   57.40
  -4  -2  -1 1469.39   57.27
   4   2   1 1415.82   57.38
  -4  -2  -1 1482.20   57.46
   4   2   1 1520.93   57.41
  -4  -2  -1 1445.33   57.39
  -4  -2  -1 1564.36   57.56
   4   2   1 1421.66   57.48
   6   0  -4 1031.95   35.93
  -6   0   4  811.68   35.57
  -6   0   4 1011.47   36.02
   6   0  -4  873.45   35.50
  -6   0   4  971.34   36.02
   6   0  -4 1037.07   36.06
   6   0  -4 1019.14   35.99
   3  -1  -5   38.50    3.28
  -3   1   5   42.59    3.06
  -3   1   5   44.46    2.56
   3   1  -5   42.03    3.04
   3   1  -5   46.64    2.45
   3   1  -5   16.29    3.45
   3   1  -5   51.60    3.53
  -3  -1   5   34.37    3.87
  -3  -1   5   47.55    2.44
   3   1  -5   50.77    2.55
   3  -1  -5   40.57    3.16
   3  -1  -5   48.06    2.56
   3  -1  -5   47.35    3.19
   2   2  -4  782.04   28.20
  -2   2   4  713.01   27.38
  -2   2   4  721.65   28.11
   2  -2  -4  709.08   27.88
   2  -2  -4  733.37   27.73
  -2   2   4  737.49   27.93
   2  -2  -4  717.57   27.97
   2   2  -4  692.15   27.43
  -2  -2   4  731.92   27.97
   2   2  -4  717.52   27.91
   2   2  -4  727.86   27.94
  -2  -2   4  713.36   27.46
  -2  -2   4  633.46   28.09
   0   0   5    0.59    2.24
   0   0  -5    1.10    1.14
   0   0   5   -0.21    1.27
   0   0  -5    0.71    1.17
   0   0  -5    0.40    2.64
   0   0  -5   -2.97    3.67
   0   0  -5    2.77    2.47
  -4   0  -3    0.16    1.94
  -4   0  -3    0.34    2.24
   4   0   3    2.64    3.56
   4   0   3   -0.08    1.07
   4   0   3    1.01    1.88
   1   3   0 5563.97  201.18
  -1  -3   0 5285.98  201.05
  -1   3   0 5175.07  201.07
   1   3   0 5156.59  201.10
   1  -3   0 5325.52  201.01
  -1  -3   0 5597.41  201.19
   1   3   0 5212.84  201.08
  -1  -3   0 4591.11  201.09
   1  -3   0 5395.47  201.16
  -1  -3   0 5335.65  201.08
  -1   3   0 5408.34  201.07
   1   1  -5 1452.21   53.83
  -1   1   5 1388.33   53.86
   1  -1  -5 1487.16   53.98
   1  -1  -5 1479.24   54.16
   1  -1  -5 1408.26   53.61
  -1   1   5 1456.95   54.16
   1  -1  -5 1438.44   53.82
   1   1  -5 1455.25   53.87
  -1  -1   5 1524.77   53.89
   1   1  -5 1495.94   54.36
  -1  -1   5 1421.89   53.88
   6   0   1    3.55    1.99
   6   0   1    0.92    2.22
   6   0   1    1.49    2.61
  -6   0  -1    2.59    2.52
  -6   0  -1   -1.19    2.47
  -6   0  -1    0.58    2.73
   1  -3  -1  921.45   35.24
  -1   3   1  949.71   35.30
   1  -3  -1  932.07   35.32
  -1  -3   1  895.00   35.17
   1  -3  -1  882.20   35.23
   1   3  -1  894.51   35.27
  -1   3   1  874.93   35.22
   1   3  -1  914.97   35.21
   1   3  -1  909.81   35.33
  -1  -3   1  912.48   35.32
  -2  -2  -3 5040.28  183.79
  -2  -2  -3 4985.37  184.04
   2   2   3 4664.69  183.55
   2   2   3 4864.43  183.82
  -2  -2  -3 4755.54  183.78
  -2  -2  -3 4665.28  184.10
   2   2   3 4902.43  183.83
  -2  -2  -3 4533.06  183.40
  -2   2  -3 5095.03  183.82
   2  -2   3 5165.68  183.86
  -2   2  -3 4991.10  183.49
  -2   2  -3 5143.88  184.38
  -2   2  -3 4967.30  183.52
   2  -2   3 4901.67  183.76
   2  -2   3 5009.51  183.47
  -2   2  -3 4768.67  184.11
   2  -2   3 4806.96  183.50
  -2   2  -3 5023.68  183.79
   2   2   3 4645.52  183.42
  -2  -2  -3 4970.27  183.57
   1   3   1  450.87   18.32
  -1  -3  -1  467.34   18.57
   1  -3   1  476.15   18.25
   1   3   1  468.52   18.52
  -1  -3  -1  476.38   18.43
   1  -3   1  407.87   18.37
  -1   3  -1  484.79   18.28
  -1  -3  -1  442.51   18.49
  -1   3  -1  476.00   18.54
   1  -3   1  466.26   18.53
   0   2   4  284.37   12.01
   0  -2  -4  318.66   12.08
   0   2  -4  308.50   12.31
   0   2   4  304.30   12.37
   0   2  -4  323.10   12.21
   0  -2  -4  297.40   12.31
   0  -2  -4  296.99   12.03
   0  -2   4  310.04   12.38
   0   2  -4  324.44   12.71
   0   2  -4  307.13   11.90
   0   2   4  289.54   12.15
   0  -2   4  297.92   12.16
  -5   1  -2   52.45    4.55
  -5  -1  -2   45.82    3.70
   5   1   2   49.21    3.72
   5  -1   2   57.85    3.06
   5   1   2   45.84    3.44
  -5  -1  -2   52.24    3.73
  -5  -1  -2   54.87    3.10
   5   1   2   57.49    2.83
  -5   1  -2   40.95    3.89
   5   1   2   62.96    4.26
   5  -1   2   36.95    3.38
   5  -1   2   56.90    2.94
   5   1   2   52.12    3.50
  -5   1  -2   61.32    3.88
   5  -1   2   59.16    3.24
  -5   1  -2   56.85    3.51
  -4  -2   4   22.34    2.88
  -4  -2   4   18.70    3.09
   4   2  -4   20.47    2.27
  -4   2   4   21.54    2.01
  -4  -2   4   16.27    1.60
   4  -2  -4   16.13    2.45
   4  -2  -4   21.18    2.59
   4   2  -4    8.86    2.76
  -4  -2   4   14.45    2.31
  -4   2   4   18.70    2.97
  -4   2   4   19.42    2.51
   4   2  -4   19.10    3.18
   4   2  -4   22.08    1.53
   4  -2  -4   18.52    2.16
   4  -2  -4   15.24    1.88
  -7   1   2    3.53    1.80
   7   1  -2    0.27    2.71
  -7  -1   2    3.95    1.44
  -7   1   2    3.91    2.42
   7   1  -2    1.02    2.88
  -7  -1   2    0.40    2.50
  -7   1   2    4.31    2.06
   7  -1  -2    3.57    2.68
   7  -1  -2    2.22    2.87
  -7  -1   2    2.90    1.93
  -7  -1   2    3.67    1.97
  -7  -1   2    2.11    2.38
  -7   1   2    2.73    1.77
   7   1  -2    3.64    1.89
   7   1  -2    2.91    2.11
   7  -1  -2    2.32    2.78
   1  -3  -2  896.94   35.30
   1   3  -2  891.83   35.33
  -1  -3   2  915.94   35.19
  -1  -3   2  934.17   35.38
   1   3  -2  929.60   35.19
   1  -3  -2  873.88   35.24
  -1   3   2  913.96   35.24
   5   1  -5 5956.15  213.50
   5   1  -5 4673.25  213.26
   5   1  -5 5754.53  213.16
  -5  -1   5 6550.16  213.28
  -5   1   5 5144.99  213.43
   5   1  -5 5970.77  212.98
  -5   1   5 5708.87  213.24
   5  -1  -5 5816.56  213.15
  -5  -1   5 5738.34  213.55
   5  -1  -5 5490.19  213.19
   5  -1  -5 5940.08  213.48
   5  -1  -5 6127.37  213.32
  -7   1   1  625.27   24.46
  -7  -1   1  616.35   24.24
   7   1  -1  581.97   24.32
   7  -1  -1  606.75   24.43
  -7  -1   1  654.31   24.39
   7  -1  -1  598.98   24.41
   7  -1  -1  637.62   24.52
   7  -1  -1  639.50   24.43
   7   1  -1  630.53   24.48
  -7  -1   1  596.67   24.58
  -7  -1   1  549.67   24.46
  -7   1   1  643.44   24.22
  -7   1   1  638.49   24.32
   7   1  -1  643.08   24.27
   7   1  -3  405.08   16.60
  -7   1   3  408.95   17.10
   7   1  -3  433.13   17.10
  -7   1   3  437.15   16.80
   7  -1  -3  425.41   16.59
   7  -1  -3  438.64   17.17
  -7  -1   3  388.49   16.90
   7  -1  -3  431.20   17.17
  -7  -1   3  426.20   16.75
   7   1  -3  424.42   16.93
   7  -1  -3  450.81   16.93
  -7   1   3  431.23   16.55
   4   2   2  681.07   27.21
  -4  -2  -2  679.36   27.20
  -4  -2  -2  753.10   27.23
  -4   2  -2  698.50   27.38
   4  -2   2  744.80   27.65
  -4  -2  -2  684.48   26.81
   4   2   2  670.10   26.79
   4   2   2  690.19   27.19
  -4  -2  -2  691.64   27.33
  -4  -2  -2  698.46   26.85
   4  -2   2  678.15   27.13
  -4   2  -2  699.62   26.99
   4  -2   2  706.83   26.98
   4  -2   2  701.25   26.75
  -4   2  -2  650.18   27.48
   4  -2   2  603.44   27.68
   4  -2   2  697.98   26.85
  -4   2  -2  689.09   26.76
  -4   2  -2  736.60   26.90
  -4   2  -2  687.63   27.36
   4   2   2  694.62   26.81
   4   2   2  648.62   27.04
  -6   0   5    0.42    1.93
   6   0  -5    1.06    1.31
  -6   0   5    0.78    2.12
   6   0  -5   -1.52    2.38
   6   0  -5    3.42    1.68
   6   0  -5   -0.48    2.20
  -3  -3   1   89.78    4.38
  -3   3   1   78.88    4.47
   3   3  -1   89.01    4.42
   3   3  -1   85.64    4.36
  -3  -3   1   87.85    4.59
   3   3  -1   96.96    4.65
  -3  -3   1   88.90    4.10
  -3   3   1   85.96    4.30
  -3  -3   1   79.30    4.05
   3  -3  -1   57.65    4.41
   3  -3  -1   84.05    4.29
   3  -3  -1   77.19    4.25
   3   3  -1   49.14    4.07
  -3   3   1   87.05    4.45
  -3   3   1   70.75    4.39
  -6   2   2  801.11   30.18
   6   2  -2  800.37   30.11
  -6   2   2  776.95   30.42
   6  -2  -2  807.36   30.29
  -6  -2   2  846.74   30.45
   6   2  -2  709.22   30.46
   6  -2  -2  800.94   30.49
   6  -2  -2  778.84   30.28
  -6  -2   2  777.64   30.25
   6  -2  -2  879.83   30.18
   6  -2  -2  772.23   30.45
   6   2  -2  801.00   29.99
   6   2  -2  724.03   30.35
   6   2  -2  767.07   30.19
  -6   2   2  714.98   29.90
   6  -2  -2  794.68   30.43
  -6   2   2  779.99   30.22
  -6  -2   2  773.65   29.97
  -6  -2   2  782.77   30.03
  -6  -2   2  685.93   30.43
  -6   2   2  757.01   30.44
   6  -2  -1  675.99   25.92
  -6   2   1  624.95   25.98
  -6   2   1  649.92   25.87
   6  -2  -1  655.73   25.85
   6  -2  -1  626.54   25.85
  -6   2   1  707.30   25.68
   6   2  -1  644.91   25.85
  -6  -2   1  640.61   25.65
  -6  -2   1  662.33   25.66
   6   2  -1  656.32   25.72
  -6  -2   1  600.60   25.84
   6  -2  -1  660.71   25.95
   6  -2  -1  658.01   25.92
  -6   2   1  667.15   25.95
   6   2  -1  654.71   25.63
   6   2  -1  642.54   25.92
  -6   2   1  654.19   25.80
   6   2  -1  667.44   25.81
   6  -2  -1  689.28   25.90
  -6  -2   1  673.53   26.00
  -6  -2   1  649.04   25.81
   6   2  -1  693.83   26.05
  -6   2   1  704.40   25.88
   3  -3   0 9307.96  376.27
  -3   3   010387.40  376.45
  -3   3   0 9727.17  376.35
   3  -3   0 9904.88  376.24
  -3  -3   010143.90  376.31
   3   3   010338.80  376.32
   3   3   010849.80  376.28
  -3  -3   010229.40  376.19
   3  -3   0 9921.30  376.38
   3   3   010273.80  376.38
  -3  -3   0 9939.11  376.19
   3   3   010328.90  376.31
  -3   3   010004.80  376.28
  -3  -3   0 9518.53  376.33
   1  -3   2  622.92   24.97
   1   3   2  680.48   24.47
  -1  -3  -2  607.52   24.72
  -1   3  -2  626.28   24.84
   1   3   2  613.09   24.57
  -1   3  -2  598.21   24.91
  -1  -3  -2  599.18   24.94
   1  -3   2  608.38   25.10
  -1  -3  -2  578.81   24.92
   1   3   2  590.22   24.82
   1   3   2  640.76   24.69
   1  -3   2  667.98   24.91
   1  -3   2  650.64   24.65
  -1  -3  -2  655.57   24.94
  -1   3  -2  670.34   24.63
  -3   3   2  459.27   15.48
   3   3  -2  489.97   15.31
   3   3  -2  453.27   15.41
  -3   3   2  527.37   15.62
  -3   3   2  512.55   15.32
   3   3  -2  550.71   15.73
   3  -3  -2  462.38   15.36
   3  -3  -2  495.71   15.51
  -3  -3   2  509.45   15.45
  -3  -3   2  513.60   15.02
   3  -3  -2  430.67   15.49
   3  -3  -2  517.55   15.48
   3  -1   4   29.08    1.97
   3  -1   4   24.26    2.24
  -3  -1  -4   21.11    2.97
  -3   1  -4   29.71    3.13
   3  -1   4   21.84    4.39
  -3   1  -4   25.19    1.88
  -3  -1  -4   26.68    2.11
   3   1   4   25.81    2.01
  -3   1  -4   24.40    4.20
  -3   1  -4   26.65    2.43
   3   1   4   25.82    3.71
   3  -1   4   14.33    2.72
  -3  -1  -4   27.67    2.94
   6   2  -3 3396.81  130.71
  -6   2   3 3439.36  130.18
   6   2  -3 3410.20  130.04
  -6  -2   3 3681.06  130.64
  -6  -2   3 3447.48  130.19
  -6   2   3 3645.38  130.58
   6  -2  -3 3627.25  130.12
   6  -2  -3 3441.55  130.55
   6  -2  -3 3415.63  130.61
  -6  -2   3 3156.24  130.00
  -6  -2   3 3459.01  130.34
   6   2  -3 3665.53  130.21
  -6   2   3 3242.14  130.02
   6  -2  -3 3541.91  130.41
   6   2  -3 3412.45  130.33
  -6   2   3 3512.38  130.38
   6  -2  -3 3483.36  130.25
   6   2  -3 2938.20  130.41
   6   2  -3 3486.28  130.57
  -1   1  -5   25.16    3.03
   1  -1   5   25.62    2.88
  -1   1  -5   22.95    3.52
  -1  -1  -5   22.61    3.40
  -1   1  -5   26.58    1.87
  -1   1  -5   29.29    2.08
   1   1   5   22.11    2.95
  -1  -1  -5   27.14    2.87
   1   1   5   22.93    3.45
  -1  -1  -5   23.06    2.11
   1  -1   5   28.38    2.23
   1   1   5   26.41    2.24
   7  -1   0  496.32   19.02
   7  -1   0  506.49   19.06
  -7  -1   0  455.30   19.21
  -7   1   0  488.03   19.09
  -7   1   0  490.38   19.30
  -7   1   0  499.14   19.14
  -7   1   0  519.39   19.31
  -7  -1   0  413.94   19.06
  -7  -1   0  458.77   19.04
   7   1   0  477.48   19.08
   7   1   0  461.91   19.15
   7  -1   0  484.37   19.40
   2   0  -6  743.14   29.01
   2   0  -6  745.63   28.73
   2   0  -6  743.92   29.51
  -2   0   6  737.22   28.98
  -7  -1   4 4354.25  172.97
   7  -1  -4 4791.65  173.16
  -7   1   4 5125.54  173.37
  -7  -1   4 3931.47  173.12
   7   1  -4 4472.52  173.16
   7  -1  -4 4735.88  172.91
  -7  -1   4 4675.69  172.92
  -7   1   4 4593.40  172.71
   7   1  -4 4304.02  172.68
   7   1  -4 4325.02  172.95
  -7   1   4 4755.45  173.22
   7   1  -4 4837.26  172.90
   7  -1  -4 4424.22  172.68
   7  -1  -4 4532.76  173.22
   4   0  -610992.40  402.02
   4   0  -610734.70  401.98
   4   0  -6 9587.06  402.13
   4   0  -610752.30  402.00
  -6   0  -210894.50  413.91
  -6   0  -211047.30  414.03
   6   0   210957.20  413.92
   6   0   210863.10  414.00
  -6   0  -210558.80  414.03
  -6  -2   0 1187.30   44.96
  -6  -2   0 1160.54   44.95
  -6  -2   0 1005.83   44.77
  -6   2   0 1177.33   45.17
   6   2   0 1184.43   45.09
  -6   2   0 1201.29   45.12
   6   2   0 1197.02   45.00
  -6  -2   0 1150.43   45.14
   6  -2   0 1171.42   45.23
   6   2   0 1148.71   44.90
   6  -2   0 1149.91   44.85
   6   2   0 1136.25   44.92
   6  -2   0 1286.33   45.21
   6  -2   0 1177.23   44.96
  -6  -2   0 1138.52   44.86
  -6   2   0 1174.32   44.93
   6  -2   0 1180.47   44.93
  -6   2   0 1217.17   44.99
  -6   2   0 1134.59   44.87
   6   2   0 1136.79   44.90
  -6   2   0 1186.49   45.02
   1   3  -3  385.69   14.71
   1  -3  -3  377.29   14.96
   1   3  -3  364.26   14.93
  -1   3   3  359.75   15.24
   1  -3  -3  373.81   14.82
  -1   3   3  370.09   14.76
  -1   3   3  360.65   14.97
   1   3  -3  367.15   14.99
  -1   3   3  373.23   14.35
  -1  -3   3  365.58   14.96
  -1  -3   3  326.61   14.99
  -8   0   2  125.79    6.41
   8   0  -2  144.32    6.30
   8   0  -2  141.49    6.58
  -8   0   2  132.87    6.50
   3   3   1 2021.08   81.35
  -3  -3  -1 2152.52   81.27
  -3  -3  -1 2103.82   81.31
  -3  -3  -1 2087.07   81.25
   3   3   1 2186.80   81.55
   3   3   1 2100.21   81.09
   3   3   1 2191.51   81.29
  -3   3  -1 2053.60   81.39
   3   3   1 2060.63   81.24
  -3   3  -1 2176.70   81.38
   3  -3   1 2137.87   81.59
  -3   3  -1 2126.67   81.63
  -3   3  -1 2060.68   81.18
  -3  -3  -1 2088.90   81.46
  -3   3  -1 2081.26   81.38
   3  -3   1 2190.87   81.14
   3  -3   1 2129.42   81.16
   3  -3   1 2192.50   81.34
   2  -2  -5 3195.97  111.24
  -2   2   5 3213.55  110.69
  -2   2   5 3178.46  111.37
   2   2  -5 3241.70  111.36
   2  -2  -5 3160.03  111.45
   2  -2  -5 2969.21  111.45
   2  -2  -5 2186.97  110.61
   2  -2  -5 3213.18  111.04
   2  -2  -5 3314.49  110.83
   2   2  -5 2172.17  111.25
   2   2  -5 3010.45  110.85
  -2  -2   5 2708.07  111.63
  -2  -2   5 3254.24  110.93
  -2  -2   5 3241.99  111.34
   2   2  -5 3306.86  111.31
   2   0   5    0.65    1.04
  -2   0  -5    0.07    2.42
  -2   0  -5   -0.64    3.02
   2   0   5    1.08    2.58
  -2   0  -5    0.29    2.82
   2   0   5    0.52    3.69
   8   0  -3    1.70    2.54
  -8   0   3   -1.45    2.80
   8   0  -3   -0.45    2.18
  -8   0   3   -0.29    0.89
  -8   0   3   -1.15    2.72
  -8   0   3    2.19    2.57
   8   0  -3   -1.14    2.50
  -8   0   3   -0.18    1.49
   2  -2   4 1032.59   38.94
   2   2   4  978.45   38.60
  -2  -2  -4  983.71   39.31
   2   2   4  996.92   39.11
  -2   2  -4 1033.39   38.64
  -2  -2  -4 1116.79   39.06
  -2   2  -4 1048.06   39.56
   2   2   4 1030.15   38.98
  -2  -2  -4 1014.80   38.95
  -2   2  -4  945.97   38.50
  -2  -2  -4 1001.63   38.51
  -2   2  -4 1030.23   38.91
  -2  -2  -4  993.94   38.63
  -2   2  -4 1103.09   39.10
   2  -2   4 1058.50   38.65
   2  -2   4 1066.77   39.09
   2  -2   4  955.71   38.50
  -3  -3   3  269.65   11.25
  -3  -3   3  270.99   10.39
  -3  -3   3  290.74   11.04
  -3   3   3  272.97   11.00
   3  -3  -3  282.07   10.98
   3  -3  -3  281.58   11.07
  -3   3   3  300.58   10.68
  -3   3   3  287.66   11.17
   3   3  -3  210.54   11.03
   3  -3  -3  208.80   10.76
  -3   3   3  240.34   10.26
   3   3  -3  276.08   10.93
   3   3  -3  254.22   10.90
   3   1  -6   -0.83    1.93
  -3  -1   6    0.84    3.41
   3   1  -6   -2.22    1.84
   3  -1  -6    0.89    2.34
   3  -1  -6    0.93    1.52
   3  -1  -6    6.44    2.25
   3   1  -6    1.65    2.94
   3  -1  -6   -0.11    2.73
   3   1  -6   -1.80    3.16
  -3  -1   6    1.48    1.73
   3  -1  -6    0.09    2.81
  -3   1   6    0.51    2.21
   4  -2  -5 6420.98  240.11
  -4   2   5 6459.34  240.20
   4  -2  -5 6096.81  240.03
  -4   2   5 6425.06  239.77
  -4   2   5 6494.13  240.20
  -4  -2   5 6223.67  240.38
   4   2  -5 6333.21  239.95
   4   2  -5 6550.31  240.23
   4   2  -5 5833.66  240.26
  -4  -2   5 6489.10  239.61
   4   2  -5 6108.71  239.57
  -4  -2   5 6422.85  240.21
   4  -2  -5 6115.71  239.74
   8   0  -1    4.55    3.02
   8   0  -1   -1.79    3.29
   8   0  -1   -3.05    2.23
  -8   0   1    3.40    2.71
  -8   0   1    0.17    2.48
  -4   0  -441659.00 1525.08
   4   0   441173.90 1524.59
   4   0   438788.70 1524.48
   4   0   439987.00 1525.02
  -4   0  -439768.10 1524.98
   4   0   441172.20 1525.28
   4   0   441552.10 1525.47
  -4   0  -440012.20 1525.43
   6  -2  -4   64.01    3.51
   6  -2  -4   92.32    4.65
  -6  -2   4   92.15    3.99
   6   2  -4   93.89    4.03
   6   2  -4   87.43    4.67
   6  -2  -4   91.93    4.36
   6   2  -4   93.95    3.90
   6  -2  -4   87.92    3.83
  -6  -2   4   87.30    4.21
  -6   2   4   89.26    4.52
  -6  -2   4   89.56    4.82
  -6   2   4   79.95    3.68
  -6   2   4   99.06    4.48
   5   1   3 3256.74  124.28
   5   1   3 3136.26  123.89
  -5  -1  -3 3239.18  124.04
  -5   1  -3 3262.98  124.51
  -5  -1  -3 3224.46  124.16
   5   1   3 3233.92  123.79
  -5  -1  -3 3504.06  124.36
   5  -1   3 3388.83  124.19
   5  -1   3 3247.50  123.57
  -5   1  -3 3341.76  124.26
   5   1   3 3332.61  123.57
   5  -1   3 3257.20  123.89
   5  -1   3 3189.01  123.68
  -5   1  -3 3096.64  124.06
   5   1   3 3247.54  124.08
  -5   1  -3 3203.60  123.87
  -5  -1  -3 3061.64  123.86
   8   0  -4  757.28   30.56
  -8   0   4  812.52   30.05
   8   0  -4  765.26   30.64
  -8   0   4  783.19   30.83
  -8   0   4  779.46   30.59
   8   0  -4  744.19   30.51
   1  -3   3  770.54   32.04
   1  -3   3  808.50   31.62
  -1  -3  -3  878.41   31.66
   1  -3   3  776.59   31.85
   1   3   3  848.35   31.33
   1  -3   3  844.23   31.30
   1  -3   3  773.58   31.05
   1   3   3  825.08   31.69
   1  -3   3  887.89   31.47
  -1   3  -3  798.78   31.28
   1   3   3  792.33   31.38
   1   3   3  816.58   31.04
  -1   3  -3  822.00   31.60
  -1  -3  -3  805.27   31.77
  -1  -3  -3  752.10   31.27
  -1   3  -3  738.02   31.77
  -1  -3  -3  821.17   31.42
  -1   3  -3  803.92   31.79
   1   1  -6  540.42   20.83
   1  -1  -6  602.97   20.55
   1  -1  -6  579.67   21.26
   1  -1  -6  571.20   21.00
  -1   1   6  574.55   20.75
  -1   1   6  559.63   21.17
  -1  -1   6  600.93   20.93
   1   1  -6  533.73   20.66
   1  -1  -6  543.62   20.68
   1   1  -6  549.49   20.42
   0  -2   5   61.07    3.69
   0   2   5   67.72    3.61
   0  -2  -5   54.01    4.10
   0   2   5   59.50    3.53
   0  -2  -5   62.21    3.59
   0  -2  -5   62.63    3.29
   0  -2  -5   58.89    2.97
   0   2  -5   65.63    3.30
   0   2  -5   45.71    2.35
   0  -2   5   60.41    3.40
   0   2  -5   57.36    3.36
   0   2  -5   63.35    2.66
   0  -2   5    9.75    4.46
   0   0  -6 3181.20  120.00
   0   0  -6 3172.65  120.53
   0   0   6 3186.55  120.05
   0   0  -6 3288.41  121.01
   0   0  -6 3089.84  120.00
   0   0  -6 3122.44  120.81
   0   0   6 3026.75  120.58
   4   2   313196.10  499.31
   4  -2   313447.00  498.96
   4  -2   313037.00  499.02
   4  -2   313182.60  499.31
  -4   2  -313133.60  498.79
  -4  -2  -312743.30  499.33
   4   2   313193.40  498.83
  -4   2  -313172.40  499.06
  -4  -2  -313005.40  498.86
   4  -2   313766.40  500.01
   4  -2   313072.90  498.76
  -4   2  -312630.40  499.68
   4  -2   313205.50  499.73
  -4  -2  -313847.00  498.94
   4   2   312831.50  499.14
  -4   2  -312861.10  499.50
  -4  -2  -313683.00  499.64
   4   2   312814.40  499.38
  -4   2  -313654.70  499.25
  -4  -2  -312274.10  499.28
   4   2   312306.80  498.87
  -4   2  -313520.60  498.97
  -7  -1  -1 3696.89  136.53
  -7  -1  -1 3508.67  136.52
   7  -1   1 3896.89  136.48
  -7   1  -1 3189.52  136.56
  -7   1  -1 3715.57  136.81
   7   1   1 3640.83  136.58
   7  -1   1 3673.89  136.30
  -7   1  -1 3098.00  136.40
   7   1   1 3192.65  136.62
  -7   1  -1 3789.54  136.46
   7  -1   1 3545.21  136.66
   7   1   1 3628.47  136.49
  -7   1  -1 3677.85  136.76
   7  -1   1 3759.02  136.85
  -6   2  -113780.50  523.27
   6   2   113483.00  523.23
   6  -2   113557.20  523.30
  -6   2  -114189.30  523.36
   6  -2   113608.90  523.09
   6  -2   113580.90  523.10
   6   2   113882.80  523.07
  -6   2  -114154.00  523.12
   6  -2   113510.90  522.97
  -6   2  -113719.40  523.49
   6  -2   114335.10  523.54
  -6   2  -114013.80  523.03
  -6  -2  -113605.30  523.13
  -6  -2  -113980.90  523.43
   6   2   114189.70  523.33
   6  -2   114020.80  523.56
   6   2   113328.80  523.04
  -6  -2  -113505.40  523.18
  -6  -2  -113787.70  523.32
  -6  -2  -113078.70  523.22
   5   1  -6  147.04    6.66
   5   1  -6  127.91    5.68
  -5   1   6  137.37    6.47
   5  -1  -6  129.84    5.96
   5  -1  -6  119.61    6.29
  -5   1   6  133.32    5.86
   5   1  -6  149.23    6.51
  -5  -1   6   98.21    6.45
   5  -1  -6  138.78    6.31
   5   1  -6  141.28    5.68
   5   1  -6  133.14    6.43
   5  -1  -6  130.32    5.92
   7   1  -518309.20  658.76
   7  -1  -518726.60  658.50
  -7   1   518837.10  658.59
  -7  -1   514321.00  658.61
   7   1  -517958.00  658.95
  -7   1   518385.30  658.97
   7  -1  -518210.90  658.59
  -7  -1   518549.80  659.11
  -7  -1   518048.90  658.73
   7   1  -514120.30  658.51
   7  -1  -518368.40  658.90
   7  -1  -519403.20  659.09
   7   1  -516602.60  658.25
   7  -1  -517217.40  658.99
   6   0  -633770.00 1212.59
  -6   0   634201.20 1212.71
   6   0  -637457.10 1212.75
   6   0  -627547.50 1212.34
  -6   0   626200.40 1212.42
   6   0  -637867.30 1212.69
  -3   3  -2 2390.09   87.78
  -3  -3  -2 2387.36   87.29
   3  -3   2 2299.02   87.06
   3  -3   2 2116.65   86.98
   3   3   2 2330.84   86.97
  -3   3  -2 2322.02   87.36
  -3  -3  -2 2231.41   87.31
   3  -3   2 2159.53   87.29
  -3   3  -2 2336.82   87.52
   3   3   2 2189.19   87.56
  -3  -3  -2 2209.43   87.16
  -3  -3  -2 2306.74   87.43
   3   3   2 2309.25   87.17
   3   3   2 2248.00   87.45
   3  -3   2 2332.39   87.31
  -3  -3  -2 2191.98   87.46
   3  -3   2 2299.32   87.95
   3   3   2 2261.02   87.37
   3   3   2 2383.99   87.26
  -3   3  -2 2283.31   87.09
  -3  -3  -2 2285.32   87.34
   5  -3  -1    0.67    2.52
  -5  -3   1    1.94    3.09
   5  -3  -1    2.68    2.49
  -5   3   1    0.38    2.86
  -5  -3   1    0.47    2.69
   5   3  -1    1.44    2.55
  -5   3   1    1.65    2.60
   5   3  -1    3.01    2.90
   5   3  -1   -2.05    2.27
   5   3  -1   -0.09    2.67
   5  -3  -1    0.50    2.45
   5   3  -1    0.88    1.94
  -5   3   1    0.99    2.48
  -5  -3   1   -0.97    2.15
  -5  -3   1    3.39    2.61
  -5  -3   1    0.69    2.20
  -5  -3   1    2.08    2.45
   5  -3  -1   -0.19    2.91
  -5   3   1   -0.07    2.44
  -5   3   1    1.57    2.15
   5  -3  -1    2.59    2.55
  -8   0   0   23.01    2.88
   8   0   0   21.84    2.94
   8   0   0   24.04    3.66
   8   0   0   19.95    2.74
   8   0   0   24.94    3.55
  -8   0   0   24.65    3.03
  -8   0   0   20.41    2.96
  -5   3   2 9207.40  353.24
  -5  -3   2 9232.16  353.08
  -5  -3   2 9318.72  353.29
  -5  -3   2 8832.33  353.35
  -5  -3   2 9183.59  353.60
   5   3  -2 9542.31  353.62
  -5   3   2 9247.61  353.21
   5   3  -2 9275.21  353.31
  -5  -3   2 9939.25  353.71
   5   3  -2 8838.25  353.31
  -5   3   2 9062.34  353.44
  -5   3   2 9385.79  353.50
   5  -3  -2 9123.25  353.51
   5  -3  -2 9227.84  353.29
   5   3  -2 9270.74  353.57
   5  -3  -2 9353.94  353.51
   5   3  -2 9016.91  353.62
   5  -3  -210914.60  353.90
  -5   3   2 9284.06  353.59
  -1   3   4  787.91   29.69
  -1  -3   4  791.19   29.95
  -1  -3   4  822.04   29.50
   1   3  -4  847.88   29.61
   1  -3  -4  810.74   29.89
  -1   3   4  771.90   29.36
   1  -3  -4  793.93   30.11
  -1  -3   4  849.18   30.23
  -1   3   4  861.68   30.30
  -1   3   4  827.18   29.99
   1  -3  -4  800.65   29.74
  -1   3   4  621.16   29.15
   1  -3  -4  674.97   29.96
   1   3  -4  841.52   30.06
   1   3  -4  856.02   29.98
   3   3  -4 1985.54   72.38
  -3   3   4 2024.44   72.02
   3  -3  -4 1612.93   72.22
  -3   3   4 1990.91   72.58
   3  -3  -4 2045.52   72.61
  -3  -3   4 2048.32   72.54
  -3  -3   4 1886.70   71.82
  -3   3   4 2102.98   72.65
  -3  -3   4 1703.61   71.75
   3   3  -4 1916.43   72.50
  -3  -3   4 1719.09   72.70
   3   3  -4 2005.47   72.28
   3   3  -4 1880.22   72.65
  -3  -3   4 1966.52   72.59
   3  -3  -4 1915.32   72.31
   5   3   0  834.28   32.01
   5  -3   0  795.06   31.84
   5  -3   0  938.75   32.31
   5   3   0  863.95   31.84
  -5   3   0  830.02   32.02
  -5  -3   0  802.66   31.84
  -5   3   0  825.45   32.00
  -5  -3   0  851.23   31.92
   5   3   0  753.04   31.95
   5   3   0  744.48   31.73
   5   3   0  833.29   32.08
  -5  -3   0  822.33   31.98
   5  -3   0  782.90   31.85
  -5  -3   0  787.05   31.78
  -5  -3   0  812.34   31.98
  -5  -3   0  853.25   32.28
  -5   3   0  793.23   31.86
   5   3   0  816.95   31.93
  -5   3   0  845.90   32.10
   5  -3   0  803.36   31.98
   5  -3   0  832.73   32.13
  -5   3   0  827.69   31.89
   5   3  -3 1085.15   40.04
   5  -3  -3 1143.80   40.40
  -5  -3   3 1071.11   39.90
  -5  -3   3 1055.84   39.62
   5   3  -3 1148.95   40.54
  -5  -3   3 1107.96   40.15
   5   3  -3 1105.88   39.93
   5   3  -3 1176.47   40.42
   5  -3  -3 1037.28   40.28
   5  -3  -3 1046.65   40.28
  -5   3   3 1089.59   40.27
  -5   3   3 1017.05   39.68
  -5   3   3 1017.95   39.90
   5  -3  -3 1020.62   39.97
  -5   3   3 1119.19   40.18
   8   0  -5    2.54    2.43
   8   0  -5   -0.68    2.47
   8   0  -5    0.37    1.30
  -8   0   5    2.37    3.03
  -8   0   5   -1.99    2.45
   8   0  -5    0.73    3.18
  -8   0   5   -0.70    1.58
   6   2  -5   49.03    4.07
   6  -2  -5   49.25    4.17
  -6  -2   5   51.65    3.18
  -6  -2   5   56.27    3.96
   6   2  -5   60.15    3.08
   6   2  -5   56.86    2.95
   6  -2  -5   60.46    3.45
   6  -2  -5   56.11    2.59
   6  -2  -5   55.85    3.62
  -6   2   5   58.15    3.46
   6  -2  -5   44.80    2.60
  -6   2   5   55.56    3.91
  -6   2   5   54.47    3.92
   6   2  -5   59.13    3.87
  -6  -2   5   46.83    4.05
   6   0   3   -1.01    3.61
  -6   0  -3    3.00    2.93
   6   0   3    0.19    2.37
  -6   0  -3    1.27    2.23
  -3  -1  -5 4416.37  168.56
   3   1   5 3975.03  168.73
   3   1   5 4391.15  168.88
   3  -1   5 4703.13  168.37
   3   1   5 4409.69  168.23
   3  -1   5 4462.51  168.14
   3  -1   5 4347.43  169.18
  -3   1  -5 4418.71  168.13
  -3   1  -5 4526.26  168.66
  -3  -1  -5 4214.35  168.27
  -3  -1  -5 4471.76  168.86
   3  -1   5 4535.89  168.73
  -3   1  -5 4396.68  168.29
   2   2  -6  333.30   16.13
   2  -2  -6  419.71   15.72
  -2   2   6  434.17   15.79
   2  -2  -6  421.75   16.10
   2  -2  -6  438.17   15.36
   2  -2  -6  420.30   15.43
   2  -2  -6  431.40   16.13
   2   2  -6  369.47   15.70
   2  -2  -6  320.25   14.94
  -2  -2   6  426.74   15.92
   2   2  -6  414.79   15.38
  -2  -2   6  459.45   15.52
  -2  -2   6  388.66   16.56
   4   0  -7    0.51    2.20
   4   0  -7    0.51    2.31
   4   0  -7    1.17    2.14
   4   0  -7   -0.83    3.13
  -1  -1  -6  778.48   30.95
  -1   1  -6  794.24   30.31
  -1   1  -6  777.59   30.25
  -1  -1  -6  771.89   30.88
  -1  -1  -6  786.46   30.32
  -1   1  -6  743.62   31.36
   1   1   6  754.80   30.36
   1   1   6  796.00   30.96
   1  -1   6  800.93   30.32
  -1   1  -6  823.63   31.38
  -1   1  -6  749.13   30.71
   1   1   6  792.44   31.04
   1  -1   6  834.80   30.88
   4   2  -6  729.05   30.67
   4   2  -6  825.94   31.28
   4   2  -6  748.18   30.71
   4  -2  -6  850.09   31.38
  -4  -2   6  878.70   31.94
   4   2  -6  913.82   31.75
  -4   2   6  820.92   30.87
  -4   2   6  874.13   31.55
   4   2  -6  878.11   31.52
   4   2  -6  927.20   31.79
   4  -2  -6  727.90   30.74
   4  -2  -6  846.58   30.91
   4  -2  -6  834.91   31.41
  -4  -2   6  832.27   30.77
  -6  -2  -2  182.71    8.48
   6  -2   2  177.95    8.04
   6   2   2  180.94    8.61
  -6  -2  -2  182.18    8.00
  -6   2  -2  180.50    8.76
  -6   2  -2  190.80    8.47
   6  -2   2  180.24    7.80
  -6   2  -2  185.11    8.09
   6  -2   2  188.34    8.06
   6   2   2  177.54    8.06
   6   2   2  189.88    8.09
   6   2   2  189.00    7.77
   6  -2   2  184.01    8.36
  -6  -2  -2  180.78    8.60
   6  -2   2  192.68    9.28
   6   2   2  191.31    8.40
  -6   2  -2  192.22    8.88
  -6  -2  -2  173.45    8.40
  -6   2  -2  192.34    9.03
  -8   0  -1   -0.60    2.76
   8   0   1    1.15    2.43
  -8   0  -1   -2.51    3.08
   8   0   1    2.31    3.27
   8   0   1   -0.36    2.72
  -8   0  -1    1.98    2.76
  -8   0  -1    0.21    3.12
  -5   3  -1 3455.27  132.67
  -5   3  -1 3722.72  132.94
   5  -3   1 3576.28  133.13
  -5   3  -1 3519.16  133.15
   5  -3   1 3439.42  132.65
   5  -3   1 3506.00  133.37
   5  -3   1 3751.22  132.95
   5   3   1 3424.42  132.96
   5   3   1 3567.59  132.89
   5   3   1 3455.60  132.85
  -5  -3  -1 3308.54  132.86
  -5  -3  -1 3550.37  132.94
   5   3   1 3337.14  132.80
   5   3   1 3427.89  132.72
  -5  -3  -1 3499.42  132.79
   5  -3   1 3468.26  132.62
  -5   3  -1 3614.65  132.89
  -5   3  -1 3509.95  132.94
   5  -3   1 3554.99  132.81
   5   3   1 3469.92  132.61
  -5  -3  -1 3461.65  132.74
  -5  -3  -1 3232.73  132.61
  -5  -3  -1 3496.04  132.80
  -5  -3  -1 3092.32  133.06
   7  -1   2  304.79   12.12
  -7   1  -2  288.10   12.63
   7  -1   2  294.07   12.97
   7   1   2  302.39   12.30
   7   1   2  282.00   12.37
  -7  -1  -2  281.21   12.46
   7   1   2  285.27   12.64
  -7   1  -2  315.40   12.96
  -7  -1  -2  267.31   12.18
  -7   1  -2  295.00   12.21
   7   1   2  276.55   12.17
   7  -1   2  305.26   11.95
  -7   1  -2  309.75   12.54
  -2   0   7   -1.90    2.48
   2   0  -7    0.83    2.98
   2   0  -7   -0.45    4.02
   2   0  -7    0.86    2.98
   2   0  -7    2.11    1.91
   2   0  -7    0.68    1.87
  -1   3  -4 2122.36   78.84
   1   3   4 2192.10   79.31
  -1   3  -4 2083.16   79.19
   1  -3   4 1840.73   78.59
  -1   3  -4 2208.24   79.52
  -1   3  -4 2156.51   79.61
   1  -3   4 2104.21   79.24
   1   3   4 2035.45   78.94
  -1  -3  -4 2066.91   78.96
  -1  -3  -4 2130.40   79.21
  -1  -3  -4 2094.02   79.46
   1   3   4 2159.93   79.03
  -1  -3  -4 2050.67   78.97
   1  -3   4 2251.93   79.15
   8  -2  -2   92.80    5.27
   8  -2  -2  105.25    5.75
  -8   2   2   85.10    5.24
  -8  -2   2   99.23    4.45
  -8   2   2   88.30    4.88
   8   2  -2  106.11    4.70
  -8  -2   2   77.83    4.92
   8   2  -2   86.92    5.19
   8   2  -2   97.37    4.92
  -8  -2   2   89.37    5.16
   8   2  -2   93.46    5.11
   8  -2  -2   92.10    4.84
  -8   2   2   98.42    5.45
  -8   2   2  100.90    4.52
   8  -2  -2   94.05    5.29
  -8  -2   2   89.23    5.18
  -8  -2   2   94.35    4.66
   8  -2  -2   89.30    5.14
  -8   2   2   94.77    4.92
   0  -4   0  988.52   37.40
   0   4   0  837.38   37.25
   0  -4   0  966.66   37.57
   0   4   0  966.74   37.27
   0   4   0  978.03   37.28
   0   4   0 1026.47   37.40
   0  -4   0  913.19   37.40
   0  -4   0  974.46   37.28
   7  -1  -6 5984.66  202.90
   7  -1  -6 5689.35  202.37
   7  -1  -6 5885.60  202.69
   7   1  -6 5439.76  202.49
  -7  -1   6 5523.28  202.92
   7   1  -6 5365.22  202.58
  -7   1   6 5325.30  202.62
   7  -1  -6 5267.67  202.33
   7   1  -6 5566.50  202.18
  -7  -1   6 6317.57  202.66
   7  -1  -6 4447.36  202.11
   7   1  -6 5039.45  202.62
   7  -1  -6 5909.96  202.94
  -7  -1   6 4237.31  202.49
  -2   2  -512808.00  468.24
   2  -2   512729.10  468.07
  -2   2  -512749.90  468.05
   2   2   511659.10  468.27
  -2  -2  -513352.00  468.32
  -2  -2  -512418.70  467.72
  -2  -2  -513033.40  468.11
  -2  -2  -511333.70  467.67
   2  -2   513368.60  467.85
   2  -2   512390.40  468.29
   2   2   513029.30  468.17
  -2   2  -512050.40  467.80
   2   2   511511.60  467.70
   3  -3   3  106.46    7.72
  -3  -3  -3  144.61    5.96
   3   3   3  144.32    6.59
   3   3   3  143.74    6.86
  -3   3  -3  137.89    6.04
  -3  -3  -3  134.80    7.00
   3   3   3  135.42    6.09
  -3   3  -3  137.32    7.30
   3  -3   3  142.08    6.60
   3   3   3  126.11    6.61
   3   3   3  149.19    5.96
   3   3   3  134.65    7.45
  -3  -3  -3  140.46    7.04
  -3   3  -3  147.87    7.40
  -3   3  -3  145.06    6.46
  -3  -3  -3  132.78    6.28
   3  -3   3  133.31    6.54
  -3  -3  -3  141.66    6.62
   3  -3   3  140.64    6.02
  -3  -3  -3  148.32    6.47
   3  -3   3  137.14    6.05
  -8  -2   312454.00  470.81
  -8   2   312467.00  470.68
  -8   2   312539.60  471.43
   8   2  -311908.00  470.85
  -8  -2   311762.80  471.44
   8  -2  -312773.60  471.40
   8   2  -311677.80  471.33
   8  -2  -312612.40  471.47
  -8   2   313021.70  471.08
  -8   2   312241.00  471.03
  -8  -2   312236.70  470.84
   8  -2  -312680.60  471.40
  -8  -2   311702.20  471.13
  -8   2   312187.10  471.46
   8  -2  -312566.70  471.14
   8   2  -312155.30  471.16
   8   2  -312666.20  471.53
   8   2  -312418.60  470.89
   8  -2  -312675.20  471.14
  -8  -2   312978.10  471.30
  -5  -3   4  100.92    4.61
  -5   3   4  112.25    5.69
   5  -3  -4  111.63    5.42
  -5   3   4  110.47    4.90
   5  -3  -4   97.50    4.71
   5  -3  -4   94.94    5.27
  -5  -3   4  110.88    5.62
  -5  -3   4   97.71    5.03
   5   3  -4   98.91    5.10
   5   3  -4   98.44    4.61
   5   3  -4   96.93    5.65
   5   3  -4   97.21    5.85
  -9   1   3  494.35   19.45
   9  -1  -3  536.69   19.66
  -9   1   3  489.45   19.03
   9   1  -3  494.04   19.29
   9  -1  -3  472.53   19.54
  -9  -1   3  477.10   18.80
   9  -1  -3  497.27   19.69
   9   1  -3  472.74   19.66
  -9   1   3  510.60   19.00
  -9  -1   3  431.80   19.67
  -9  -1   3  484.23   19.54
   9  -1  -3  518.50   19.87
   9   1  -3  465.36   19.53
   9   1  -3  437.67   19.60
  -9  -1   3  524.34   19.34
  -9   1   3  462.40   19.79
   9  -1  -2   15.36    3.31
  -9   1   2   16.50    2.48
  -9  -1   2   13.37    2.54
  -9  -1   2   12.09    3.13
  -9  -1   2   15.33    3.27
   9   1  -2   11.46    2.66
   9   1  -2   10.30    2.97
   9   1  -2   11.74    2.33
  -9  -1   2   10.18    3.14
   9  -1  -2   15.50    3.35
  -9   1   2   13.34    2.38
   9   1  -2   17.60    3.39
  -9   1   2   10.35    3.06
  -9  -1   2   10.63    2.18
   9  -1  -2    9.10    2.76
  -5   1  -4 3320.04  126.43
  -5  -1  -4 3375.65  126.97
   5   1   4 3311.20  126.30
   5  -1   4 3353.67  126.81
  -5   1  -4 3469.77  126.76
  -5  -1  -4 3256.18  126.58
   5  -1   4 3382.07  126.46
   5   1   4 3453.39  126.69
  -5   1  -4 3246.10  127.21
   5   1   4 3255.57  125.96
  -5  -1  -4 3254.10  126.45
  -5   1  -4 3398.39  126.80
   5  -1   4 3361.54  126.18
   5  -1   4 3227.29  126.00
   5   1   4 3248.27  126.93
   0  -4  -1  767.36   31.87
   0  -4  -1  821.87   31.82
   0   4   1  832.18   31.80
   0  -4   1  807.13   31.66
   0  -4   1  766.75   31.92
   0   4   1  823.52   31.87
   0  -4  -1  798.98   31.77
   0  -4  -1  823.94   31.90
   0  -4   1  797.93   31.94
   0   4  -1  810.54   31.80
   0   4  -1  817.48   31.83
   0   4  -1  831.13   31.71
  -8  -2   1  742.69   28.15
  -8  -2   1  708.91   28.13
  -8  -2   1  744.55   28.36
  -8   2   1  726.81   28.38
   8  -2  -1  736.42   28.54
   8  -2  -1  706.56   28.34
  -8   2   1  716.97   28.52
   8  -2  -1  705.28   28.31
   8  -2  -1  747.51   28.36
  -8   2   1  694.17   28.20
   8   2  -1  723.28   28.39
   8   2  -1  718.23   28.35
   8   2  -1  738.23   28.19
  -8  -2   1  635.54   28.28
  -8  -2   1  734.97   28.46
   8   2  -1  713.03   28.26
   8  -2  -1  726.66   28.61
  -8   2   1  650.61   28.40
  -8   2   1  786.20   28.20
  -2   0  -6 1299.50   48.95
  -2   0  -6 1277.70   48.46
  -2   0  -6 1229.79   49.24
   2   0   6 1320.50   49.39
   2   0   6 1291.43   49.69
  -2   0  -6 1301.05   49.57
   2   0   6 1231.30   48.49
   3   1  -7 1389.88   62.05
   3  -1  -7 1650.28   61.86
  -3  -1   7 1718.71   61.66
   3  -1  -7 1490.95   61.41
   3  -1  -7 1651.84   61.71
  -3   1   7 1724.57   61.83
   3  -1  -7 1744.65   62.02
   3   1  -7 1641.59   61.75
   3   1  -7 1731.32   61.66
   3   1  -7 1617.93   61.52
  -4  -2  -4    2.42    1.74
  -4   2  -4    0.51    2.17
  -4   2  -4    5.12    3.29
   4  -2   4    0.91    1.08
  -4  -2  -4    3.67    2.71
  -4  -2  -4    2.73    3.32
   4   2   4    1.84    3.17
   4   2   4    1.43    1.34
  -4  -2  -4    3.56    3.29
  -4   2  -4    0.22    2.06
   4  -2   4    2.67    3.96
  -4   2  -4   -0.16    4.13
  -4   2  -4    1.17    3.13
   4   2   4    0.62    1.88
   4  -2   4    1.65    1.79
   4   2   4    2.33    2.12
  -4  -2  -4    0.42    1.60
   4   2   4   -2.07    3.19
  -4  -2  -4   -2.27    3.72
   4  -2   4    2.03    2.59
   4  -2   4    0.56    2.32
   4   0   5    0.09    2.34
   4   0   5    0.03    1.19
   4   0   5    1.88    3.07
   4   0   5   -3.30    4.06
  -4   0  -5    3.17    2.82
  -4   0  -5   -0.70    2.53
  -4   0  -5    0.75    3.04
  -4   0  -5   -1.17    3.12
   9   1  -4   13.72    3.14
   9  -1  -4    8.16    3.42
  -9  -1   4    9.89    2.28
   9  -1  -4   12.60    3.00
   9   1  -4   12.30    1.94
   9  -1  -4    9.04    3.14
  -9   1   4    8.01    2.51
  -9  -1   4    7.72    2.97
  -9   1   4   13.89    3.30
   9  -1  -4    6.47    1.87
  -9   1   4    9.24    3.09
  -9   1   4    8.19    1.82
   9   1  -4    7.26    2.60
   2  -4  -1  697.72   28.67
   2   4  -1  728.87   28.54
  -2  -4   1  710.59   28.64
  -2  -4   1  727.29   28.55
  -2   4   1  692.76   28.57
   2  -4  -1  732.75   28.56
   2   4  -1  708.21   28.55
   2  -4  -1  717.75   28.54
  -2   4   1  778.19   28.57
  -2   4   1  704.81   28.59
   2   4  -1  756.75   28.76
   2   4  -1  730.78   28.61
  -2  -4   1  729.43   28.64
   2   4   0 9567.68  375.96
  -2  -4   0 9701.54  376.08
  -2   4   010107.50  375.98
  -2  -4   010251.90  375.99
   2  -4   010109.90  376.13
  -2  -4   0 9799.11  375.99
   2   4   0 9189.80  375.92
   2   4   0 9949.63  376.04
   2   4   010250.20  376.11
  -2   4   010291.60  375.97
  -2  -4   0 9048.35  376.08
   2  -4   010132.90  375.91
   9   1  -1  489.88   20.24
  -9   1   1  500.53   19.91
  -9   1   1  490.68   20.16
   9  -1  -1  510.35   20.13
  -9   1   1  506.12   20.16
   9  -1  -1  506.43   20.12
  -9  -1   1  515.08   20.14
   9  -1  -1  505.29   20.21
  -9  -1   1  490.62   19.98
   9   1  -1  471.67   20.05
  -9  -1   1  503.38   20.36
   9  -1  -1  516.33   20.36
  -9  -1   1  499.55   20.37
  -6   0   7   -0.95    2.15
   6   0  -7    0.08    2.15
   6   0  -7   -0.10    2.91
   6   0  -7   -0.10    2.43
   6   0  -7    1.40    2.73
   6   0  -7   -1.39    2.57
  -3   3   5  271.56   11.82
  -3   3   5  289.41   10.86
  -3   3   5  297.66   12.06
  -3  -3   5  263.63   10.81
   3   3  -5  282.00   11.65
  -3  -3   5  182.57   11.72
   3  -3  -5  277.62   11.67
   3   3  -5  280.23   11.62
   3   3  -5  263.37   12.02
  -3  -3   5  284.96   11.85
   3  -3  -5  295.25   11.48
   3  -3  -5  299.20   11.80
  -8   2   4  444.56   18.23
   8   2  -4  436.53   17.90
   8   2  -4  446.88   18.31
   8   2  -4  459.51   17.50
  -8  -2   4  423.14   17.89
  -8   2   4  460.39   17.86
   8   2  -4  436.43   18.45
   8  -2  -4  472.71   17.80
  -8   2   4  461.44   17.71
  -8  -2   4  443.89   18.16
   8   2  -4  459.36   17.47
  -8  -2   4  426.50   17.48
   8  -2  -4  480.38   18.37
   8   2  -4  447.53   18.12
   8  -2  -4  445.04   17.80
   8   2  -4  412.92   18.26
   8  -2  -4  465.87   18.26
   8   0  -614108.10  494.16
   8   0  -614273.90  494.70
   8   0  -614664.70  494.87
  -8   0   613827.20  494.53
  -8   0   614226.30  494.92
   8   0  -613775.40  494.83
   5  -1  -7   38.77    3.30
   5   1  -7   41.84    3.64
  -5   1   7   47.09    3.20
   5   1  -7   50.50    4.21
   5  -1  -7   39.54    2.90
   5   1  -7   44.62    3.87
   5   1  -7   49.97    2.93
   5  -1  -7   44.03    3.49
   5  -1  -7   28.98    3.66
  -5   1   7   36.99    3.39
  -5  -1   7   44.56    4.31
   5   1  -7   38.17    2.65
   5  -1  -7   44.61    3.61
   0   2  -6  421.69   16.44
   0   2  -6  397.40   15.83
   0  -2  -6  435.57   17.30
   0  -2  -6  440.39   16.42
   0  -2  -6  431.15   16.44
   0  -2  -6  414.93   17.06
   0  -2   6  460.30   16.56
   0  -2  -6  411.48   15.99
   0   2   6  427.68   16.90
   0  -2   6  381.13   17.54
   0   2   6  427.18   16.49
   0   2   6  432.67   16.63
   0   2  -6  382.14   17.15
   0   2  -6  363.87   15.81
   0  -2   6  415.28   16.47
   0   2  -6  451.49   16.43
   1  -3  -5 1078.82   39.76
   1  -3  -5 1045.35   39.99
  -1   3   5  980.90   39.75
   1  -3  -5 1043.32   39.45
   1   3  -5 1051.64   40.20
  -1  -3   5 1019.47   40.04
   1   3  -5 1063.96   39.62
   1   3  -5 1100.23   40.05
  -1  -3   5 1074.38   39.66
  -1   3   5 1013.09   39.53
   1  -3  -5 1019.85   40.24
  -1   3   5 1102.14   40.50
  -1   3   5 1049.16   40.10
  -6   2   6 2632.20   99.59
   6  -2  -6 2289.45   98.69
   6  -2  -6 2738.28   99.50
  -6   2   6 2880.24   99.23
  -6   2   6 2694.70   99.41
   6   2  -6 2741.28   99.67
   6   2  -6 2814.53   99.09
  -6  -2   6 2637.21   98.95
   6   2  -6 2830.17   99.69
   6  -2  -6 2638.23   99.14
   6  -2  -6 2721.49   99.28
   6   2  -6 2579.93   98.92
   6   2  -6 2828.72   99.52
   0   4   2 3773.40  148.90
   0  -4   2 4004.64  149.17
   0  -4  -2 4042.18  149.11
   0   4  -2 4039.11  149.02
   0   4  -2 4103.02  149.11
   0  -4   2 3783.80  148.73
   0  -4   2 3899.65  148.98
   0   4  -2 3968.29  148.81
   0   4   2 3708.36  148.54
   0  -4   2 3741.85  149.19
   0  -4  -2 3969.95  148.90
   2   4  -2 2863.61  111.75
  -2   4   2 3046.31  111.79
   2  -4  -2 2837.67  111.82
  -2   4   2 2885.48  111.81
  -2   4   2 2978.91  111.92
   2  -4  -2 3004.69  111.78
  -2  -4   2 2773.83  111.87
   2  -4  -2 2892.02  111.78
   2   4  -2 2950.72  111.75
  -2  -4  -1  930.21   36.31
   2   4   1  896.19   35.92
  -2   4  -1  950.24   35.96
   2  -4   1  939.82   35.96
  -2  -4  -1  879.35   36.01
  -2  -4  -1  918.56   36.08
   2  -4   1  828.44   36.08
   2   4   1  938.10   36.00
   2   4   1  911.14   36.27
   2   4   1  968.79   35.87
  -2  -4  -1  968.89   36.25
   2  -4   1  894.64   36.29
  -2   4  -1  959.80   36.24
  -1   1   7  155.81    6.58
   1  -1  -7  150.20    7.39
   1   1  -7  141.61    8.06
   1  -1  -7  142.96    6.45
   1  -1  -7  143.75    6.93
   1  -1  -7  166.61    6.43
   1   1  -7  152.86    7.98
   1   1  -7  139.81    6.38
  -1   1   7  146.68    7.13
   1   1  -7  137.29    6.08
   1   1  -7  150.35    6.87
  -1  -1   7  157.69    6.87
   8   2   0  257.35   11.47
   8   2   0  267.18   11.42
  -8   2   0  274.66   11.51
  -8  -2   0  269.20   11.48
   8   2   0  277.74   11.45
  -8   2   0  258.32   11.52
   8   2   0  268.38   11.66
  -8   2   0  289.08   11.64
   8  -2   0  274.58   12.03
   8  -2   0  259.28   11.34
   8   2   0  278.32   11.33
   8  -2   0  276.79   11.32
   8  -2   0  264.05   11.43
  -8  -2   0  274.31   11.50
  -8  -2   0  274.06   11.58
  -8  -2   0  260.02   11.45
  -8   2   0  257.33   11.62
   5  -3   2 5209.65  194.45
  -5  -3  -2 5079.51  194.93
   5  -3   2 5786.26  195.47
  -5   3  -2 5313.08  194.92
   5  -3   2 5060.04  194.37
  -5   3  -2 5142.75  194.48
  -5   3  -2 5060.72  194.87
   5  -3   2 4860.05  194.74
  -5   3  -2 5111.58  194.42
  -5   3  -2 5119.21  195.13
  -5   3  -2 5092.46  194.66
   5  -3   2 5171.42  194.62
   5   3   2 5119.36  194.76
  -5  -3  -2 5155.38  194.72
  -5  -3  -2 4932.65  194.40
   5   3   2 4977.41  194.37
  -5  -3  -2 5327.60  194.85
   5   3   2 4947.26  194.46
  -5  -3  -2 5111.33  194.50
   5   3   2 5073.32  194.69
  -5  -3  -2 4917.31  194.71
   5   3   2 5072.55  194.71
   0   0  -7   -0.60    2.93
   0   0  -7   -0.17    4.42
   0   0   7    0.38    1.53
   0   0   7    0.60    2.49
   0   0  -7   -2.22    3.02
   0   0  -7    0.52    1.41
   0   0  -7    0.73    1.39
   7   3  -2    2.17    2.25
   7   3  -2   -1.05    2.72
  -7   3   2    3.65    2.27
   7  -3  -2    2.26    3.04
   7   3  -2    1.50    2.99
   7  -3  -2    0.11    3.03
   7   3  -2   -1.36    2.62
  -7   3   2    0.48    2.36
  -7   3   2    2.88    3.06
   7  -3  -2   -1.06    2.64
  -7  -3   2    5.63    2.95
  -7   3   2   -2.52    2.17
   7  -3  -2    2.75    2.35
  -7  -3   2   -1.83    2.17
  -7  -3   2   -1.77    2.84
   7   3  -2   -0.49    2.97
  -7  -3   2   -0.08    2.10
  -7   3   2    0.37    2.78
   7   3  -2   -0.39    1.85
   7  -3  -2    0.10    3.03
  -7  -3   2    1.11    2.85
   7  -3  -2   -0.49    2.63
   9   1  -5 1648.82   62.09
   9  -1  -5 1524.62   61.74
  -9  -1   5 1681.05   61.95
   9   1  -5 1614.71   61.93
   9   1  -5 1551.18   61.54
   9  -1  -5 1710.90   62.19
  -9   1   5 1814.46   62.38
   9  -1  -5 1603.52   62.09
   9   1  -5 1658.36   61.71
  -9   1   5 1593.20   61.45
   9  -1  -5 1631.26   61.44
  -9   1   5 1584.70   62.16
   9   1  -5 1378.52   61.93
  -9  -1   5 1648.18   61.72
  -9  -1   5 1537.70   62.13
   5  -3  -5  247.57   10.16
   5   3  -5  238.24    9.95
  -5  -3   5  250.34   10.00
   5   3  -5  234.76   10.17
   5  -3  -5  210.21    9.67
  -5   3   5  253.50    9.66
  -5  -3   5  216.78    9.32
   5   3  -5  220.07    9.31
  -5  -3   5  248.66   10.52
  -5   3   5  261.92   10.45
   5   3  -5  230.61   10.40
  -5   3   5  241.60   10.29
   5  -3  -5  233.18   10.15
  -5  -3   5  232.91   10.33
   9  -1   0  669.87   27.64
  -9   1   0  731.47   27.69
   9   1   0  718.28   27.55
  -9   1   0  676.49   27.39
   9  -1   0  679.87   27.52
   9  -1   0  707.81   27.41
  -9  -1   0  680.66   27.39
   9   1   0  672.80   27.46
  -9  -1   0  669.73   27.59
  -9   1   0  711.42   27.49
   9  -1   0  709.00   27.79
  -7   3   1  646.92   25.43
  -7  -3   1  628.20   25.16
  -7   3   1  615.22   25.23
  -7   3   1  631.89   25.23
  -7  -3   1  598.20   25.02
   7   3  -1  614.22   25.26
   7  -3  -1  641.82   25.31
  -7  -3   1  603.58   25.26
   7   3  -1  617.65   25.19
   7  -3  -1  655.54   25.27
   7  -3  -1  611.91   25.15
  -7   3   1  649.32   25.22
   7  -3  -1  745.07   25.52
   7   3  -1  611.69   25.14
  -7  -3   1  656.35   24.96
  -7   3   1  646.16   24.95
   7  -3  -1  630.77   25.38
   7   3  -1  652.26   25.43
   7   3  -1  627.23   24.94
  -7  -3   1  644.60   25.53
   7   3  -1  648.33   25.19
   7  -3  -1  638.88   25.29
  -7   3   3 1160.57   46.04
  -7  -3   3 1125.84   45.73
   7   3  -3 1219.53   46.26
  -7   3   3 1211.86   46.24
  -7  -3   3 1131.23   46.17
  -7   3   3 1210.90   45.65
  -7   3   3 1159.02   45.91
   7  -3  -3 1174.33   46.13
   7  -3  -3 1141.60   45.96
   7   3  -3 1012.30   45.89
   7  -3  -3 1222.19   45.79
   7   3  -3 1249.41   45.48
  -7  -3   3 1253.61   46.27
   7  -3  -3 1184.85   46.22
  -7  -3   3 1167.87   45.82
   7   3  -3 1183.69   45.85
   7   3  -3 1112.44   46.16
   7  -3  -3 1210.61   45.70
   7   3  -3 1201.56   46.17
   7   3  -3 1205.67   45.76
  -7   3   3 1213.47   45.54
  -7  -3   3 1202.77   45.45
  -8   0  -2  263.88   11.69
  -8   0  -2  265.43   11.54
   8   0   2  265.04   11.69
   8   0   2  267.29   11.45
  -8   0  -2  271.18   11.59
   8   0   2  283.32   11.72
  -6   0  -4  169.11    7.59
   6   0   4  165.50    8.41
  -6   0  -4  140.59    7.90
   6   0   4  162.46    6.64
   6   0   4  166.49    7.48
  -6   0  -4  171.31    7.54
  10   0  -3   -2.45    2.23
  10   0  -3    0.36    2.63
  10   0  -3    0.12    2.89
 -10   0   3    2.67    1.50
 -10   0   3   -2.60    3.29
 -10   0   3    0.73    2.63
  -8  -2   5 5010.42  186.07
   8   2  -5 5132.59  185.70
   8   2  -5 4888.98  186.17
   8  -2  -5 5144.37  186.31
  -8  -2   5 5144.63  186.33
   8   2  -5 5167.12  186.09
  -8   2   5 4937.43  186.32
   8  -2  -5 5253.47  185.92
  -8   2   5 5136.86  186.05
   8  -2  -5 5166.84  186.04
  -6   2  -3 4975.58  181.03
   6  -2   3 4792.57  180.75
   6  -2   3 4869.73  180.38
   6   2   3 4798.04  180.80
   6   2   3 4781.73  180.13
   6   2   3 4771.66  180.43
  -6   2  -3 4722.89  181.08
   6  -2   3 4619.10  180.07
   6   2   3 4597.94  180.31
  -6   2  -3 4725.60  180.86
   6  -2   3 4756.14  181.16
  -6   2  -3 4933.79  180.66
   6  -2   3 4637.60  180.30
  -6  -2  -3 4378.75  180.65
  -6  -2  -3 4685.97  180.36
  -6   2  -3 4746.42  180.37
  -6  -2  -3 4971.51  180.82
   6   2   3 4539.32  180.73
  -6  -2  -3 4710.11  180.98
  10   0  -2 1373.97   52.69
  10   0  -2 1379.04   52.42
 -10   0   2 1260.65   52.41
 -10   0   2 1407.98   52.61
   2  -4  -3   -3.32    2.93
   2  -4  -3    5.05    3.06
   2  -4  -3    3.17    2.67
  -2  -4   3    3.00    2.95
  -2  -4   3    0.64    1.86
  -2   4   3    1.01    3.54
   2   4  -3   -1.63    3.19
  -2  -4   3   -0.37    3.34
   2   4  -3    0.90    2.17
  -2   4   3   -3.66    2.50
  -4  -4   1  354.55   13.94
   4  -4  -1  345.07   14.21
   4   4  -1  323.86   14.30
   4   4  -1  369.16   14.32
  -4   4   1  339.47   14.26
  -4   4   1  365.19   14.18
   4   4  -1  292.20   14.18
  -4   4   1  341.81   14.04
  -4  -4   1  352.26   14.43
  -4  -4   1  359.57   14.00
  -4  -4   1  354.35   14.28
  -4   4   1  340.64   14.36
   4  -4  -1  329.41   14.33
   4   4  -1  324.24   14.24
   4  -4  -1  343.56   14.24
  10   0  -4  443.44   16.71
 -10   0   4  392.12   16.68
  10   0  -4  420.88   16.42
 -10   0   4  420.42   16.70
  10   0  -4  435.83   16.70
 -10   0   4  447.91   15.98
 -10   0   4  378.55   15.63
  10   0  -4  414.14   16.80
 -10   0   4  412.22   16.93
   7  -1   3 3825.13  145.22
   7   1   3 3720.87  145.29
  -7  -1  -3 3616.90  145.25
  -7   1  -3 4047.25  145.93
   7  -1   3 3779.08  144.95
  -7  -1  -3 3907.03  145.81
  -7   1  -3 3867.05  145.22
   7   1   3 3704.12  145.59
  -7  -1  -3 3846.17  145.51
  -7   1  -3 3962.06  145.59
   7   1   3 3855.68  145.71
  -7  -1  -3 3815.79  145.36
   7   1   3 3718.60  145.40
  -7   1  -3 3637.84  145.70
   2  -4   2 2372.77   90.25
  -2   4  -2 2356.54   90.02
  -2  -4  -2 2228.79   90.05
   2  -4   2 2316.62   89.88
  -2   4  -2 2405.60   90.34
   2   4   2 2457.08   89.88
   2   4   2 2208.49   90.19
  -2  -4  -2 2335.20   90.23
  -2   4  -2 2363.04   90.24
   2   4   2 2372.04   90.47
   2   4   2 2368.25   89.98
   2  -4   2 2386.16   90.62
  -2  -4  -2 2382.37   90.41
   2  -4   2 2378.12   90.00
  -2  -4  -2 2377.84   90.49
   2   4   2 2256.01   90.07
  -3  -3  -4 8044.08  299.98
  -3  -3  -4 7651.58  299.16
  -3   3  -4 7831.37  299.04
  -3   3  -4 8092.79  299.05
  -3   3  -4 7893.91  300.20
   3  -3   4 8089.46  299.04
   3   3   4 8064.23  299.17
   3  -3   4 8221.95  299.55
   3   3   4 7949.11  299.51
   3  -3   4 7485.55  300.29
  -3  -3  -4 7964.47  299.49
   3   3   4 7519.93  299.72
  -3   3  -4 7827.22  299.43
  -3   3  -4 7938.29  299.90
   3  -3   4 8038.38  299.45
   3   3   4 7799.90  299.47
  -3  -3  -4 7616.66  298.93
   3  -3   4 7921.82  299.02
  -3  -3  -4 7986.65  299.76
   3   3   4 7594.09  298.92
  -3  -3  -4 7656.38  299.42
  -4   4   2 6297.69  233.06
  -4   4   2 6119.32  233.11
  -4   4   2 6350.68  232.79
   4  -4  -2 6145.83  233.01
  -4   4   2 6084.94  233.08
   4   4  -2 6031.84  233.05
   4  -4  -2 6130.67  233.01
  -4   4   2 6342.88  232.87
   4  -4  -2 6296.20  233.19
  -4  -4   2 6464.66  233.07
  -4  -4   2 6122.19  232.67
  -4  -4   2 6241.27  232.61
  -4  -4   2 5476.46  233.31
  -4  -4   2 6271.83  233.13
   4   4  -2 6417.17  233.16
   4   4  -2 6400.70  233.08
   4   4  -2 5882.60  232.88
   0  -4   3  174.12    8.27
   0   4   3  174.92    8.70
   0   4  -3  204.15    9.08
   0  -4   3  183.98    8.75
   0  -4  -3  197.83    8.78
   0   4   3  190.36    7.94
   0   4  -3  199.01    8.86
   0  -4   3  191.73    8.83
   0  -4  -3  190.70    8.55
   0   4  -3  192.86    8.19
   0   4  -3  178.69    8.44
   0   4   3  194.87    8.36
   0  -4   3  177.53    8.97
   7   1  -7 1428.42   52.88
   7  -1  -7 1496.75   53.12
   7  -1  -7 1530.54   52.94
   7  -1  -7 1377.86   52.58
   7   1  -7 1526.68   52.49
  -7  -1   7 1468.19   53.20
   7   1  -7 1329.32   52.67
  -7   1   7 1446.51   52.87
   7  -1  -7 1425.13   52.65
   7   1  -7 1276.29   52.83
  -1  -3  -5  326.21   13.14
  -1  -3  -5  344.91   13.55
   1  -3   5  334.96   13.44
  -1  -3  -5  335.74   13.26
  -1   3  -5  369.26   13.48
   1  -3   5  351.76   13.65
   1   3   5  344.40   13.39
   1  -3   5  279.11   12.64
   1   3   5  341.79   13.64
   1   3   5  326.60   13.11
  -1   3  -5  376.93   14.10
  -1  -3  -5  359.14   14.10
  -1   3  -5  354.87   12.93
   4  -4   0 6208.76  240.61
  -4   4   0 6143.78  240.68
   4   4   0 6275.38  240.71
  -4  -4   0 6159.15  240.59
   4  -4   0 6264.40  240.51
   4  -4   0 6999.48  240.69
  -4   4   0 6692.83  240.60
  -4  -4   0 6350.69  240.69
   4   4   0 6277.71  240.60
  -4   4   0 5738.66  240.72
  -4  -4   0 6450.29  240.49
   4   4   0 6401.22  240.52
  -4  -4   0 6190.45  240.45
   4   4   0 6414.65  240.66
   4  -4   0 6262.69  240.77
  -4   4   0 6181.30  240.58
   4  -4   0 6097.68  240.80
  -7   3   0 1253.54   45.73
  -7  -3   0 1196.44   46.02
  -7   3   0 1150.66   45.77
   7   3   0 1147.82   45.61
   7  -3   0 1167.76   46.06
  -7   3   0 1185.11   46.06
   7  -3   0 1103.90   45.85
   7  -3   0 1165.92   45.96
   7   3   0 1137.41   45.73
  -7  -3   0 1165.17   45.73
  -7   3   0 1200.49   45.69
   7  -3   0 1285.49   46.16
   7  -3   0 1222.87   45.74
  -7  -3   0 1143.89   45.70
   7  -3   0 1198.46   45.61
  -7   3   0 1182.26   45.91
   7   3   0 1164.42   45.87
  -7  -3   0 1100.49   45.90
  -7  -3   0 1139.91   45.72
   7   3   0 1163.80   45.74
  -7  -3   0 1183.08   45.59
   7   3   0 1179.06   45.70
  -7   3   0 1412.64   46.10
   7   3   0 1092.26   45.56
   7  -3   0 1157.77   45.73
   4  -2  -7  265.79    9.75
   4   2  -7  243.82    9.67
   4  -2  -7  256.81   10.67
   4   2  -7  277.14   10.91
  -4  -2   7  259.97    9.71
   4   2  -7  183.09   10.66
   4  -2  -7  255.58   10.40
  -4   2   7  275.21    9.77
   4   2  -7  209.95    9.44
   4  -2  -7  238.18   10.42
   4   2  -7  251.93   10.47
  -4   2   7  257.44   10.54
   4  -2  -7  249.96    9.78
  -7  -3   4 1311.12   48.89
   7   3  -4 1359.15   48.89
   7   3  -4 1400.21   49.31
  -7  -3   4 1277.60   49.43
  -7  -3   4 1282.11   48.82
  -7   3   4 1337.96   49.15
  -7   3   4 1366.31   48.56
  -7  -3   4 1279.82   49.51
   7  -3  -4 1354.56   48.69
   7  -3  -4 1315.25   49.31
   7  -3  -4 1412.04   49.32
  -7   3   4 1364.65   49.18
   7  -3  -4 1479.88   49.76
   7  -3  -4 1356.21   49.20
   7  -3  -4 1394.83   48.68
   7  -3  -4 1357.20   49.15
   7   3  -4 1307.69   49.39
   7   3  -4 1360.95   48.82
  -8   2  -1   11.38    3.72
  -8   2  -1   14.01    3.27
   8  -2   1   14.08    4.28
  -8   2  -1   16.08    3.34
   8  -2   1   13.27    2.78
   8  -2   1   17.70    2.74
  -8   2  -1   18.33    3.74
   8  -2   1   13.77    2.78
   8   2   1   13.34    3.54
  -8  -2  -1   14.21    3.39
  -8  -2  -1   16.91    3.43
  -8  -2  -1   16.36    3.44
   8   2   1   17.68    2.94
  -8  -2  -1   16.61    2.82
   8   2   1   14.01    3.15
   8   2   1   12.37    2.50
  -8  -2  -1   10.54    3.21
 -10   0   1   -0.75    3.05
  10   0  -1    0.49    2.81
  10   0  -1   -1.08    3.34
  10   0  -1   -0.87    3.50
 -10   0   1   -0.58    3.09
 -10   0   1    4.65    2.62
  -3  -1  -6 1824.28   72.89
  -3   1  -6 1852.56   72.12
  -3   1  -6 1867.68   72.78
   3  -1   6 1912.44   73.48
   3  -1   6 1941.41   72.17
   3   1   6 1936.84   73.16
  -3   1  -6 1821.09   73.28
  -3  -1  -6 1865.58   72.39
  -3  -1  -6 1908.08   72.70
  -3   1  -6 1853.09   72.40
   3  -1   6 1930.99   72.91
  -3  -1  -6 1873.52   73.00
   3   1   6 1942.24   73.06
  -3  -1  -6 1904.63   72.24
   3   1   6 1881.21   72.28
   2  -2  -7 3889.31  140.76
  -2  -2   7 4009.92  140.16
   2  -2  -7 3830.84  139.98
  -2  -2   7 3584.22  141.14
   2   2  -7 3808.57  140.04
   2  -2  -7 3966.70  140.25
  -2  -2   7 3961.50  140.35
  -2   2   7 4038.57  140.39
   2  -2  -7 4035.70  140.64
   2   2  -7 3069.26  140.58
   2  -2  -7 3540.93  139.66
   2   2  -7 4066.54  140.32
   2  -2  -7 4127.13  140.13
   2   2  -7 3227.32  139.59
   8   0  -7    0.82    3.21
   8   0  -7    2.61    1.97
   8   0  -7    0.05    1.60
   8   0  -7    3.02    2.84
   8   0  -7    0.77    2.51
  -8   0   7    1.91    2.60
  -8   0   7    0.37    2.60
   4   0  -8 6372.92  232.98
   4   0  -8 6072.61  232.97
   4   0  -8 6012.08  232.81
   4   0  -8 5942.77  233.29
  -4  -4   3 2432.44   91.77
   4  -4  -3 2460.27   91.71
  -4  -4   3 2387.61   91.21
  -4  -4   3 2326.06   92.07
  -4   4   3 2401.84   91.26
   4  -4  -3 2411.40   91.75
  -4   4   3 2469.90   91.85
  -4  -4   3 2369.31   91.26
  -4   4   3 2275.00   91.53
  -4   4   3 2347.56   91.54
   4  -4  -3 2361.77   91.76
  -4   4   3 2396.63   91.84
   4  -4  -3 2557.33   92.00
   4   4  -3 2224.74   91.77
   4   4  -3 2407.99   91.87
   4   4  -3 2437.04   91.74
   4   4  -3 2367.87   91.62
  10   0  -5    1.75    3.45
  10   0  -5    1.79    2.99
 -10   0   5   -0.91    1.45
  10   0  -5    0.97    2.56
 -10   0   5   -0.15    3.16
 -10   0   5    1.14    3.13
  -3   3   6  108.39    5.52
   3  -3  -6  107.69    5.11
   3   3  -6   89.85    6.02
  -3   3   6  100.58    6.20
  -3   3   6   84.49    4.03
   3   3  -6   99.86    5.29
   3   3  -6  112.15    5.67
  -3  -3   6   97.15    5.70
   3  -3  -6   95.04    5.32
  -3  -3   6  108.48    4.40
   3  -3  -6  100.94    5.37
  -3  -3   6  107.58    6.34
  -9  -1   6 3340.04  131.66
   9  -1  -6 3744.02  132.10
   9  -1  -6 3402.81  131.99
   9   1  -6 3385.58  131.48
   9   1  -6 3330.16  131.88
   9  -1  -6 3442.86  131.26
   9  -1  -6 3291.90  131.51
   9   1  -6 3485.37  131.87
  -9   1   6 3603.12  131.40
  -9  -1   6 3347.74  132.02
   9  -1  -6 3489.09  131.88
  -9   1   6 3529.85  131.99
   9   1  -6 3436.91  131.70
  -9  -1   6 3418.23  131.63
  -2   2  -6  141.70    6.67
   2   2   6  125.79    6.27
  -2  -2  -6  153.62    6.33
   2  -2   6  138.16    6.31
  -2  -2  -6  140.24    6.57
  -2  -2  -6  128.29    5.47
  -2   2  -6  140.23    5.84
   2   2   6  147.40    7.04
  -2  -2  -6  125.29    5.52
  -2   2  -6  146.41    6.04
   2  -2   6  147.88    6.61
   1  -1   7  587.36   22.22
  -1   1  -7  556.19   22.12
  -1   1  -7  570.62   23.58
  -1   1  -7  581.78   22.26
  -1  -1  -7  557.49   23.02
  -1   1  -7  567.57   22.81
   1   1   7  571.20   23.19
  -1   1  -7  572.48   23.45
   1  -1   7  579.49   22.83
  -1  -1  -7  609.93   23.01
  -1  -1  -7  545.21   22.18
   1   1   7  579.30   22.99
   1   1   7  556.09   22.29
  -9  -1  -1 1500.18   59.45
  -9   1  -1 1511.40   59.34
   9   1   1 1498.08   59.47
  -9  -1  -1 1532.23   59.46
   9   1   1 1510.71   59.41
   9  -1   1 1552.76   59.82
  -9   1  -1 1552.18   59.71
  -9   1  -1 1513.99   59.62
  -9   1  -1 1587.54   59.47
   9  -1   1 1581.61   59.39
   9  -1   1 1539.12   59.63
   4  -4   1 1281.21   50.18
   4   4   1 1304.75   50.08
   4   4   1 1226.00   49.50
  -4   4  -1 1300.07   49.90
  -4   4  -1 1284.53   49.97
   4  -4   1 1351.64   49.67
  -4   4  -1 1350.55   50.18
  -4  -4  -1 1262.66   49.77
  -4   4  -1 1300.07   49.70
  -4  -4  -1 1291.93   49.75
   4  -4   1 1253.06   49.82
   4   4   1 1253.81   49.73
   4  -4   1 1242.19   49.54
   4   4   1 1293.85   49.77
  -4  -4  -1 1331.33   49.81
   4   4   1 1193.19   49.86
  -4   4  -1 1371.75   49.96
  -4  -4  -1 1249.69   49.94
   5  -1   5 2589.03  105.43
   5   1   5 2995.89  106.80
   5  -1   5 2953.08  105.70
   5  -1   5 2913.58  107.00
  -5   1  -5 3012.36  106.10
  -5  -1  -5 2954.26  106.08
   5  -1   5 3082.23  106.13
  -5  -1  -5 2826.66  106.23
  -5   1  -5 3042.53  107.05
  -5  -1  -5 2794.11  106.69
   5  -1   5 2520.06  105.44
  -5   1  -5 2974.79  106.46
   5  -1   5 2965.28  106.53
   5   1   5 2905.55  105.86
  -4   2  -5 7672.44  274.34
  -4   2  -5 7427.11  274.37
   4  -2   5 7483.23  274.38
  -4   2  -5 7330.00  275.32
   4   2   5 7258.89  274.88
  -4  -2  -5 7778.54  274.77
  -4  -2  -5 7160.27  274.94
   4   2   5 6333.00  273.94
   4  -2   5 7851.30  274.88
   4   2   5 7397.37  274.48
   4  -2   5 7717.37  274.35
  -4  -2  -5 7409.80  274.91
  -4  -2  -5 7041.57  274.20
  -4   2  -5 7449.41  274.73
   5  -3   3   42.41    5.92
  -5  -3  -3   74.08    5.13
  -5   3  -3   77.15    5.16
  -5   3  -3   71.94    5.25
  -5  -3  -3   64.26    3.72
  -5  -3  -3   80.69    4.52
   5   3   3   72.51    4.71
   5   3   3   76.07    3.95
  -5   3  -3   68.61    5.34
   5   3   3   67.72    3.82
   5   3   3   73.36    4.55
  -5  -3  -3   68.08    4.83
   5   3   3   66.97    4.56
  -5  -3  -3   60.82    4.08
  -5  -3  -3   71.63    5.17
   5  -3   3   70.87    3.75
   5  -3   3   71.19    4.39
  -5   3  -3   78.28    3.73
  -5   3  -3   67.32    3.95
   5  -3   3   68.50    4.52
   5  -3   3   70.87    3.87
  -5   3  -3   72.18    4.14
   2   0  -8    3.70    2.95
  -2   0   8    3.40    2.63
   2   0  -8    3.36    3.41
   2   0  -8    4.01    4.35
   2   0  -8    1.02    1.90
   2   0  -8    2.46    1.94
   6   2  -7 4128.13  135.03
   6  -2  -7 3707.95  134.71
  -6   2   7 3930.62  134.93
   6   2  -7 3056.46  133.85
   6  -2  -7 3942.86  134.38
   6  -2  -7 3740.67  134.54
  -6   2   7 3420.18  134.21
   6   2  -7 4185.13  135.02
   6   2  -7 4302.09  134.92
   6   2  -7 3845.59  134.38
   6   2  -7 3548.38  134.10
  -6  -2   7 2480.59  134.59
  -8  -2   6  698.89   27.58
  -8  -2   6  675.92   28.14
   8  -2  -6  774.34   27.90
  -8   2   6  746.37   28.25
   8  -2  -6  761.95   27.33
  -8  -2   6  660.72   27.93
   8  -2  -6  708.45   27.59
   8   2  -6  742.51   27.25
   8  -2  -6  695.64   28.08
   8   2  -6  666.11   28.13
   8   2  -6  709.08   27.53
  -8   2   6  758.38   27.77
  -8   2   6  781.92   27.91
   8  -2  -6  762.05   28.25
  -2   4   4  844.65   32.49
   2  -4  -4  798.59   33.18
  -2   4   4  858.83   32.97
   2   4  -4  860.96   33.08
  -2   4   4  789.79   32.28
  -2  -4   4  824.59   33.17
  -2   4   4  844.96   33.12
   2   4  -4  897.65   33.20
  -2   4   4  913.12   33.41
  -2  -4   4  891.46   32.54
   2  -4  -4  842.70   32.94
  -2  -4   4  812.59   33.23
  -2  -4   4  820.32   32.27
   2  -4  -4  812.85   33.04
   2   4  -4  914.53   32.90
   1   3  -6   47.73    3.71
   1   3  -6   46.54    3.17
  -1   3   6   50.20    3.20
  -1  -3   6   52.16    3.12
   1  -3  -6   42.06    3.96
   1  -3  -6   43.08    3.11
   1   3  -6   46.99    4.49
  -1  -3   6   42.06    5.03
   1  -3  -6   45.07    3.88
  -1  -3   6   40.84    4.04
   1   3  -6   43.29    2.74
   1  -3  -6   47.92    2.77
  -1   3   6   46.71    3.56
   6   0  -8 5330.45  189.97
   6   0  -8 4889.12  190.15
   6   0  -8 5135.13  190.07
   7  -3   1   52.84    4.10
   7  -3   1   50.14    3.64
   7   3   1   53.29    3.96
   7  -3   1   53.48    5.22
   7  -3   1   51.35    4.20
  -7   3  -1   43.37    4.47
  -7  -3  -1   53.22    4.36
   7   3   1   53.33    4.06
  -7  -3  -1   53.74    4.22
  -7  -3  -1   51.62    3.63
   7  -3   1   55.67    3.70
  -7   3  -1   50.61    3.58
   7   3   1   49.25    3.87
  -7   3  -1   59.70    4.69
  -7   3  -1   52.93    3.83
   7  -3   1   67.95    4.87
  -7   3  -1   60.27    4.65
  -7   3  -1   50.62    4.28
   7   3   1   49.82    3.85
   7   3   1   51.66    4.37
   7   3   1   55.83    3.62
  -7  -3  -1   53.09    4.28
  -7  -3  -1   49.19    4.19
   5   3  -6 1074.35   42.38
   5  -3  -6 1176.72   42.73
  -5  -3   6 1068.56   43.67
   5  -3  -6 1067.92   42.79
  -5   3   6 1117.31   43.34
  -5  -3   6  948.63   42.36
   5  -3  -6 1169.80   43.24
  -5  -3   6 1185.24   43.47
   5   3  -6 1157.96   42.98
   5  -3  -6 1138.29   43.10
   5   3  -6 1228.14   43.59
   5   3  -6 1198.95   43.40
  -5   3   6 1188.54   43.37
  -5   3   6 1266.02   42.75
   5  -3  -6 1159.26   43.22
  -3   1   8  346.11   13.70
   3  -1  -8  349.65   14.20
   3   1  -8  321.64   13.63
   3  -1  -8  327.71   13.57
   3  -1  -8  333.30   13.40
   3   1  -8  325.36   14.53
  -3  -1   8  341.63   13.64
   3  -1  -8  336.95   13.89
   3   1  -8  342.52   13.64
  -3  -1   8  334.38   14.84
   3   1  -8  321.09   13.38
  -2  -4  -3  653.99   26.32
   2   4   3  664.36   25.84
  -2   4  -3  649.97   25.66
  -2  -4  -3  664.74   26.02
  -2  -4  -3  653.79   25.81
   2  -4   3  664.13   25.67
   2  -4   3  669.86   25.43
   2   4   3  611.54   25.67
   2  -4   3  684.41   26.67
   2   4   3  633.03   26.40
  -2   4  -3  632.98   26.33
   2   4   3  637.64   26.05
  -2   4  -3  687.20   26.06
   2   4   3  644.04   25.38
   2  -4   3  625.57   26.35
  -2  -4  -3  653.37   26.41
  -2  -4  -3  640.32   26.14
   2  -4   3  691.59   26.17
   2  -4   3  676.16   25.91
  -7   3   5 1694.19   45.48
   7  -3  -5 1940.80   45.76
   7   3  -5 1838.93   46.20
  -7  -3   5 1870.26   46.11
   7   3  -5 1801.99   45.72
   7  -3  -5 1885.46   45.60
   7   3  -5 1772.49   45.10
  -7  -3   5 1844.35   45.34
  -7  -3   5 1815.91   45.12
   7  -3  -5 1930.20   45.94
  -7   3   5 1928.12   45.72
   7   3  -5 1795.96   45.11
  10   0   0  571.43   23.68
 -10   0   0  552.62   23.74
  10   0   0  608.46   23.61
 -10   0   0  592.55   23.53
 -10   0   0  587.39   23.75
  10   0   0  619.77   23.91
  10   0   0  579.65   23.51
   5  -1  -8   74.07    4.88
   5  -1  -8   92.44    5.14
   5   1  -8   81.64    4.74
   5   1  -8   84.99    5.36
   5  -1  -8   84.55    4.87
   5  -1  -8   88.78    4.40
   5  -1  -8   80.81    5.19
  -5   1   8   87.89    4.66
   5   1  -8   69.53    4.29
   5   1  -8   90.47    5.25
   5   1  -8   85.32    4.30
   5   1  -8   83.40    4.24
  -5  -1   8   58.03    5.63
  -4   0  -6 7961.19  296.08
  -4   0  -6 8067.05  296.75
  -4   0  -6 7845.78  296.21
   4   0   6 7531.15  296.77
   4   0   6 7626.10  295.54
   4   0   6 7999.85  296.56
  -4   0  -6 7691.21  296.39
   2   0   7   -0.22    1.12
  -2   0  -7   -1.59    4.75
  -2   0  -7    3.55    1.18
   2   0   7   -1.73    3.15
  -2   0  -7    0.13    3.25
  -2   0  -7   -1.86    3.64
   2   0   7    2.98    4.48
  -2   0  -7    3.91    2.64
   0  -4  -4    4.01    2.67
   0  -4  -4   -1.26    2.76
   0  -4   4    0.17    2.18
   0  -4   4   -0.32    1.21
   0   4   4   -1.00    2.29
   0   4  -4   -1.09    2.11
   0  -4  -4    0.12    3.30
   0   4   4   -3.42    2.90
   0  -4   4   -0.25    3.27
   0  -4   4    0.95    3.29
   0   4   4   -0.17    1.41
   0   4  -4    0.98    2.67
   0   4  -4    1.03    3.70
   0  -4  -4    1.49    3.44
   0   4   4   -1.15    1.93
   0   4  -4    2.35    3.69
   0  -2  -7 2138.32   69.78
   0   2  -7 2061.42   70.89
   0  -2  -7 2092.91   69.62
   0  -2  -7 2146.80   70.30
   0  -2  -7 2039.44   69.17
   0   2  -7 2165.48   70.58
   0   2  -7 2142.41   69.67
   0  -2   7 1440.51   70.41
   0   2  -7 1833.66   68.99
   0  -2   7 2137.44   69.70
   0   2   7 2178.84   70.29
   0   2  -7 2061.23   69.73
   0  -2  -7 1177.64   68.91
   0  -2  -7 2282.61   70.78
   0  -2  -7 1884.02   68.98
   0   2   7 1947.86   69.89
   0  -2   7 2237.38   69.92
   0   2  -7 1958.77   69.12
   0   2   7 2013.24   69.73
  -8   0  -3    0.13    2.91
  -8   0  -3   -0.13    3.50
  -8   0  -3   -0.68    3.20
   8   0   3    2.14    2.80
  -4   4   4 1902.69   63.50
   4  -4  -4 1818.71   63.21
  -4   4   4 1349.65   62.39
  -4  -4   4 1863.63   62.72
  -4  -4   4 1905.06   63.88
   4   4  -4 1879.35   63.61
  -4   4   4 1953.40   63.06
   4  -4  -4 1796.68   63.33
   4   4  -4 1890.22   63.32
  -4   4   4 1773.76   63.50
   4   4  -4 1900.50   63.66
  -4  -4   4 1918.62   63.52
   4  -4  -4 1913.62   63.63
  -4   4   4 1340.95   62.48
   4   4  -4 1876.20   63.31
  -4  -4   4 1726.64   63.53
  10   0  -6 3763.16  134.90
 -10   0   6 3507.36  134.97
 -10   0   6 3880.25  134.94
  10   0  -6 3749.98  134.76
  10   0  -6 3621.90  134.93
   8   2   2 2323.54   91.60
   8  -2   2 2425.72   92.33
  -8   2  -2 2386.99   92.15
  -8  -2  -2 2369.69   91.82
   8   2   2 2333.70   91.42
  -8   2  -2 2561.68   92.15
   8   2   2 2286.82   91.98
  -8   2  -2 2375.70   91.95
  -8   2  -2 2599.50   91.71
   8   2   2 2360.55   91.91
  -8  -2  -2 2402.45   92.05
  -8  -2  -2 2435.26   92.10
   8  -2   2 2349.39   91.52
   8  -2   2 2314.96   91.36
   8  -2   2 2377.72   91.62
  -8  -2  -2 2476.91   91.71
   8  -2   2 2286.64   91.91
  -6  -2  -4 1499.65   57.67
  -6   2  -4 1448.92   58.10
  -6  -2  -4 1454.71   57.16
   6   2   4 1484.16   57.77
   6  -2   4 1501.91   57.66
   6   2   4 1451.07   57.15
  -6   2  -4 1525.58   58.09
  -6   2  -4 1586.26   57.61
   6  -2   4 1484.78   56.78
   6   2   4 1532.87   57.28
  -6  -2  -4 1429.58   57.63
   6  -2   4 1484.55   57.11
   6   2   4 1480.52   56.82
   6   2   4 1448.69   57.71
  -6  -2  -4 1451.97   57.48
   6  -2   4 1501.39   57.17
   6  -2   4 1515.60   58.25
  -6   2  -4 1456.38   57.21
  -4  -4  -2 1117.53   44.75
   4  -4   2 1103.78   44.76
   4  -4   2 1153.22   44.43
   4   4   2 1152.70   44.69
   4   4   2 1131.22   44.35
   4  -4   2 1138.66   45.51
  -4  -4  -2 1144.92   45.05
  -4   4  -2 1150.19   44.53
   4   4   2 1177.15   45.16
  -4   4  -2 1105.62   44.93
   4  -4   2 1180.72   44.78
  -4   4  -2 1156.88   45.28
  -4   4  -2 1210.22   44.86
   4  -4   2 1145.93   44.48
   4   4   2 1178.55   44.63
  -4   4  -2 1185.49   44.96
   4   4   2 1151.92   44.82
  -4  -4  -2 1111.91   44.62
  -4  -4  -2 1169.30   44.90
  10   2  -3  275.76   12.13
  10  -2  -3  275.21   12.28
  10   2  -3  279.67   11.92
  10  -2  -3  289.62   12.15
  10   2  -3  277.60   11.54
 -10  -2   3  288.21   11.98
  10   2  -3  273.92   12.26
  10  -2  -3  261.83   11.94
 -10  -2   3  283.12   11.93
 -10  -2   3  265.57   11.46
  10  -2  -3  272.31   12.18
 -10   2   3  286.85   12.29
 -10   2   3  294.06   11.18
 -10  -2   3  273.65   12.09
  10   2  -3  280.78   12.29
 -10   2   3  283.64   11.74
 -10   2   3  278.32   11.62
 -10  -2   3  286.51   11.22
   6  -4  -2 1024.23   39.67
   6  -4  -2 1077.16   39.95
   6   4  -2 1007.21   39.54
  -6  -4   2 1015.19   39.53
   6   4  -2 1033.06   39.82
  -6  -4   2 1039.83   39.40
   6  -4  -2 1030.85   39.77
  -6   4   2  996.97   39.64
  -6  -4   2 1025.18   39.84
   6   4  -2 1016.89   39.82
  -6   4   2 1010.27   39.74
  -6   4   2 1024.45   39.35
  -6  -4   2 1001.59   39.17
  -6  -4   2 1086.07   40.01
  -6   4   2 1043.75   39.72
   6   4  -2  969.77   39.68
   6   4  -2  905.04   39.63
   6  -4  -2  961.62   39.53
  -6   4   2 1049.04   39.43
   6   4  -2  986.39   39.68
 -10   2   2    0.63    3.26
 -10   2   2   -0.62    2.96
 -10   2   2    0.46    2.65
 -10  -2   2    2.19    2.11
 -10   2   2   -0.81    2.52
 -10  -2   2    0.89    2.72
  10  -2  -2    4.31    3.03
  10   2  -2    0.90    3.20
  10  -2  -2   -2.38    3.15
  10  -2  -2    1.64    3.72
  10   2  -2   -0.80    2.46
  10   2  -2   -2.28    2.87
 -10  -2   2    0.96    2.56
  10  -2  -2    0.14    2.89
 -10   2   2    1.22    2.68
 -10  -2   2    0.35    3.19
  10   2  -2    0.87    2.58
 -10  -2   2   -1.26    2.72
  10  -2  -2   -1.59    3.40
  -6   4   1  684.12   27.21
  -6   4   1  703.47   27.07
  -6  -4   1  651.63   26.72
   6  -4  -1  670.99   26.92
  -6   4   1  700.76   26.76
   6  -4  -1  671.23   27.02
   6  -4  -1  695.57   27.09
  -6  -4   1  662.42   26.62
  -6   4   1  670.28   26.96
   6   4  -1  636.17   26.79
   6   4  -1  691.42   27.07
  -6  -4   1  691.47   27.08
  -6  -4   1  655.89   26.85
  -6  -4   1  705.91   27.25
   6   4  -1  701.48   27.04
   6  -4  -1  666.61   26.88
  -6   4   1  705.98   26.96
   6  -4  -1  676.97   27.15
   6   4  -1  677.77   27.03
   1   1  -8   -1.92    1.84
   1  -1  -8    3.11    3.41
   1   1  -8   -4.74    2.10
   1   1  -8    0.20    3.48
   1  -1  -8   -3.19    2.16
  -1  -1   8    3.30    2.67
   1  -1  -8    6.32    3.00
  -1   1   8    3.34    2.16
   1   1  -8    0.11    3.05
   1   1  -8    0.59    1.39
   1  -1  -8    0.80    2.04
  -1   1   8    2.84    3.12
   1   1  -8    5.91    4.79
  -6   0  -5    2.31    3.00
   6   0   5    0.58    2.37
   6   0   5    0.79    3.47
   6   0   5   -0.69    1.09
   6   0   5    2.74    4.18
  -6   0  -5    2.59    2.66
  -6   0  -5    0.35    3.51
   6   0   5    1.24    1.58
  10   2  -4 1146.68   45.36
  10   2  -4 1170.82   45.00
 -10   2   4 1180.60   45.76
 -10  -2   4 1149.33   45.37
  10  -2  -4 1199.54   45.21
  10   2  -4 1169.30   45.86
 -10  -2   4 1119.54   44.73
 -10   2   4 1162.68   45.07
  10   2  -4 1215.36   45.70
 -10   2   4 1197.62   45.24
  10  -2  -4 1194.38   45.35
  10  -2  -4 1237.85   45.71
  10  -2  -4 1165.58   45.69
 -10  -2   4 1225.03   45.41
  10   2  -4 1080.43   45.53
  -7  -1  -4 1046.93   40.32
   7  -1   4 1061.12   40.11
   7   1   4 1044.08   40.34
   7   1   4 1042.16   40.20
   7  -1   4 1015.20   39.73
   7   1   4  940.77   39.84
  -7  -1  -4  970.15   40.73
  -7  -1  -4 1056.51   40.53
  -7  -1  -4 1028.37   40.15
  -7   1  -4 1027.15   40.48
   7  -1   4 1072.50   39.68
   7   1   4  987.96   40.75
  -7   1  -4  977.01   40.39
  -7   1  -4 1059.53   40.17
   7   1   4 1035.78   39.60
  -7   1  -4 1111.12   41.10
   7  -1   4 1052.35   40.55
   3  -3   5  151.43    6.84
   3   3   5  121.78    5.94
  -3   3  -5  137.39    7.88
   3   3   5  158.58    7.20
  -3   3  -5  149.45    8.13
  -3   3  -5  158.28    7.07
   3   3   5  150.38    7.36
   3   3   5  157.95    6.27
   3   3   5  150.88    6.85
   3  -3   5  148.74    6.93
   3  -3   5   50.36    7.52
  -3  -3  -5  145.44    5.94
  -3  -3  -5  151.72    6.97
  -3  -3  -5  154.67    7.92
  -3   3  -5  150.50    6.25
  -3   3  -5  157.60    6.71
  -3  -3  -5  141.00    6.34
   3  -3   5  153.10    6.23
  -3  -3  -5  157.75    7.72
   3  -3   5  156.38    6.09
  -3   3  -5  155.07    6.12
  -3  -3  -5  149.75    6.92
  -9  -1   7 9362.12  246.75
  -9   1   7 7933.38  246.59
   9  -1  -7 8841.78  246.96
   9  -1  -7 7694.95  246.17
   9   1  -7 7902.92  246.44
   9   1  -7 7997.15  245.69
  -9  -1   7 8275.82  247.03
  -9  -1   7 7826.75  246.52
   9  -1  -7 8902.59  246.98
   9  -1  -7 8366.06  246.01
   9   1  -7 8001.77  246.76
   9  -1  -7 8396.15  246.67
   9   1  -7 7831.69  246.21
  -6   4   3 1381.77   54.59
  -6  -4   3 1583.21   55.11
   6  -4  -3 1356.82   54.34
  -6   4   3 1341.47   54.27
  -6  -4   3 1489.08   54.91
   6   4  -3 1457.24   54.81
  -6   4   3 1379.62   54.76
   6  -4  -3 1431.76   54.73
   6   4  -3 1344.14   54.41
  -6  -4   3 1409.22   54.23
   6   4  -3 1448.94   54.82
   6   4  -3 1406.85   54.65
  -6  -4   3 1443.67   54.53
   6   4  -3 1460.95   54.80
   6  -4  -3 1389.60   54.65
   6  -4  -3 1437.86   54.71
  -6   4   3 1389.65   54.11
  -6   4   3 1406.72   54.63
  -6  -4   3 1384.37   53.99
   7  -1  -8   44.01    3.12
   7   1  -8   41.86    2.94
   7  -1  -8   51.51    3.36
   7   1  -8   30.69    3.51
   7  -1  -8   46.89    4.07
   7   1  -8   45.50    3.86
   7   1  -8   50.02    3.03
  -7   1   8   47.82    3.44
   7  -1  -8   38.58    3.52
  -7  -1   8   19.13    3.99
   0   0  -8 8366.11  317.67
   0   0   8 8521.62  317.43
   0   0  -8 8175.76  317.85
   0   0  -8 8354.83  316.62
   0   0  -8 8337.47  317.32
   0   0  -8 8338.74  316.61
   0   0   8 8190.33  316.68
  11  -1  -3  958.22   36.12
  11  -1  -3  879.37   35.99
  11   1  -3  884.38   36.06
  11   1  -3  873.14   36.03
 -11   1   3  929.19   36.00
 -11  -1   3  904.84   36.17
 -11   1   3  921.04   36.26
 -11  -1   3  908.98   35.27
 -11   1   3  904.45   35.40
  11  -1  -3  974.04   36.01
 -11  -1   3  929.64   35.97
  11   1  -3  949.10   36.03
 -11  -1   3  873.10   35.69
  11   1  -3  931.91   35.74
  11  -1  -3  942.87   36.23
  -9   1  -2   49.69    4.47
  -9  -1  -2   43.49    4.42
   9   1   2   44.64    3.62
  -9   1  -2   54.44    5.36
   9   1   2   42.77    3.84
  -9  -1  -2   53.55    4.53
  -9  -1  -2   47.79    3.79
  -9   1  -2   48.34    4.15
   9  -1   2   51.42    3.65
  -9   1  -2   43.39    3.86
  -9   1  -2   51.56    4.46
   9  -1   2   49.90    3.58
   9   1   2   47.10    4.22
   9  -1   2   47.80    5.00
   9   1   2   43.95    4.72
  -1   3  -6  132.36    5.83
   1  -3   6  124.01    5.75
  -1   3  -6  127.07    4.91
  -1  -3  -6  122.72    5.29
  -1   3  -6   96.54    4.64
  -1   3  -6  128.45    5.64
  -1  -3  -6  112.15    5.79
   1  -3   6  131.60    6.07
  -1   3  -6  114.97    6.86
   1   3   6  121.93    5.89
  -1  -3  -6  111.12    5.51
   1   3   6  118.33    5.23
   1   3   6  117.36    5.80
   6  -4   0 2656.86  102.33
  -6   4   0 2746.79  102.68
   6   4   0 2595.04  102.50
  -6  -4   0 2663.33  102.36
  -6   4   0 2599.46  102.36
   6  -4   0 2742.36  102.53
  -6   4   0 2778.66  102.64
   6  -4   0 2758.00  102.86
  -6  -4   0 2723.72  102.54
   6  -4   0 2592.06  102.69
  -6   4   0 2674.29  102.57
  -6  -4   0 2701.74  102.31
  -6   4   0 2648.65  102.43
  -6  -4   0 2798.44  102.91
  -6  -4   0 2692.98  102.50
   6  -4   0 2703.81  102.41
   6   4   0 2760.79  102.65
   6   4   0 2375.28  102.45
   6   4   0 2571.43  102.24
   6   4   0 2687.26  102.50
 -11  -1   4   19.06    2.48
 -11   1   4   18.09    1.45
  11  -1  -4   14.69    3.80
  11   1  -4   16.81    3.64
 -11   1   4   19.47    2.76
 -11   1   4   19.99    2.13
  11  -1  -4   17.46    3.42
  11   1  -4   10.83    2.57
  11   1  -4   18.45    3.04
  11  -1  -4   19.13    2.96
 -11  -1   4   14.87    3.39
  11  -1  -4   23.86    3.63
 -11   1   4   16.64    3.79
 -11   1   4   13.39    1.75
 -11   1   4   23.60    3.37
 -10   2   1 1113.42   43.39
  10   2  -1 1082.39   43.28
 -10   2   1 1057.03   43.55
 -10   2   1 1110.16   43.36
 -10  -2   1 1105.57   43.47
  10   2  -1 1131.02   43.19
  10  -2  -1 1094.04   43.53
  10  -2  -1 1100.14   43.20
  10  -2  -1 1059.78   43.39
 -10  -2   1 1146.91   43.10
 -10   2   1 1089.64   43.11
  10  -2  -1 1136.53   43.37
 -10  -2   1 1151.05   43.15
  10   2  -1 1061.64   43.20
 -10   2   1 1248.47   43.25
 -10  -2   1 1046.99   43.22
  10   2  -1 1079.12   43.28
   7  -3   217840.00  666.24
  -7   3  -217913.70  665.87
   7  -3   217532.80  665.54
   7   3   217424.70  665.64
   7  -3   217601.30  665.31
   7   3   216977.60  665.39
   7  -3   219101.60  666.42
  -7   3  -217526.80  666.16
  -7   3  -217688.50  665.40
   7  -3   217531.10  665.86
  -7  -3  -217332.60  665.68
   7   3   217331.80  665.80
  -7   3  -217553.60  665.84
  -7  -3  -217213.90  665.70
   7   3   216905.50  665.79
  -7  -3  -217998.80  666.01
  -7  -3  -216053.30  665.39
  -7  -3  -217555.10  665.88
   7   3   218102.40  665.44
  -7   3  -217426.00  665.46
   7  -3   217771.60  665.49
 -10   0  -1   -0.12    3.27
  10   0   1    3.58    2.66
 -10   0  -1    2.33    3.33
  10   0   1    6.18    3.63
  10   0   1    2.20    3.83
  10   0   1    0.15    2.89
 -10   0  -1    1.37    2.62
 -10   0  -1   -0.83    3.17
 -11  -1   2   -0.25    3.25
  11   1  -2    2.85    3.46
 -11  -1   2   -0.63    2.87
  11  -1  -2    4.00    3.40
  11  -1  -2    1.59    3.50
 -11   1   2    2.66    2.80
  11   1  -2    3.66    2.68
  11  -1  -2   -0.28    2.80
 -11  -1   2    2.10    3.23
  11   1  -2    1.46    2.97
 -11  -1   2    2.35    2.92
  11  -1  -2    4.95    2.84
 -11   1   2    2.20    2.51
  11   1  -2    5.81    3.28
  -2   4   5   53.87    3.68
  -2  -4   5   59.60    3.19
   2  -4  -5   56.46    4.20
   2  -4  -5   61.56    4.31
  -2   4   5   54.92    4.12
   2  -4  -5   41.23    3.72
   2  -4  -5   59.77    4.02
   2   4  -5   55.93    4.39
   2   4  -5   62.73    3.54
  -2  -4   5   53.77    4.46
  -2  -4   5   63.91    4.50
  -2   4   5   47.72    2.69
  -2   4   5   62.31    5.11
  -2   4   5   56.25    2.74
   2   4  -5   49.40    4.03
  -8   0   8 1581.75   54.79
   8   0  -8 1499.92   54.63
   8   0  -8 1541.26   54.63
   8   0  -8 1455.42   54.15
   8   0  -8 1527.57   54.64
   7  -3  -6  104.33    5.49
   7  -3  -6  121.68    6.00
   7  -3  -6  100.28    4.74
  -7   3   6  108.60    5.78
   7   3  -6  108.29    6.07
   7  -3  -6  102.39    5.50
  -7   3   6  109.19    5.99
   7  -3  -6  101.18    6.10
  -7  -3   6  103.53    6.37
  -7   3   6  107.39    5.20
   7   3  -6  108.62    4.83
   7   3  -6  102.99    5.19
   7   3  -6  111.33    5.84
  -7  -3   6   97.73    4.88
  -8   2   7 4643.97  149.59
   8   2  -7 3313.19  148.15
  -8   2   7 4522.93  149.09
   8   2  -7 3254.33  148.16
  -8  -2   7 4185.57  149.49
   8  -2  -7 3847.31  148.44
  -8  -2   7 4118.47  148.73
   8   2  -7 4085.01  148.98
   8  -2  -7 4480.34  149.06
   8   2  -7 4387.17  148.74
   8  -2  -7 4423.03  148.47
   8  -2  -7 4650.01  149.38
   8  -2  -7 4320.37  148.93
   8  -2  -7 5425.62  150.09
   8   2  -7 4567.85  149.66
   8   2  -7 4733.46  148.59
   8   2  -7 4294.24  149.30
  -8   2   7 4725.54  149.11
  -8  -2   7 3316.36  149.12
   9   3  -3   25.32    3.57
   9   3  -3   31.46    2.52
  -9   3   3   27.02    2.32
   9  -3  -3   24.17    3.81
   9  -3  -3   25.24    3.75
   9   3  -3   27.12    3.12
  -9  -3   3   24.65    2.61
  -9  -3   3   26.24    3.36
  -9  -3   3   28.67    3.55
  -9   3   3   32.16    3.54
   9  -3  -3   24.38    3.38
   9   3  -3   32.33    3.63
   9  -3  -3   26.52    3.12
   9  -3  -3   25.93    3.54
  -9  -3   3   28.86    2.46
   9  -3  -3   28.46    3.78
   9  -3  -3   23.03    2.73
  -9   3   3   25.97    3.28
   9   3  -3   24.38    2.90
  -9   3   3   27.13    2.88
  -9  -3   3   24.45    3.19
  -9   3   3   32.54    3.45
   9  -3  -2 1222.60   46.91
  -9   3   2 1215.13   46.74
  -9   3   2 1208.24   46.39
   9  -3  -2 1205.18   46.91
  -9   3   2 1173.09   47.02
  -9  -3   2 1248.42   47.07
   9  -3  -2 1247.15   46.99
   9  -3  -2 1289.61   46.76
   9   3  -2 1285.42   46.55
   9   3  -2 1225.24   47.03
   9   3  -2 1159.39   46.85
  -9  -3   2 1197.00   46.47
   9   3  -2 1175.97   46.73
  -9  -3   2 1174.88   46.50
  -9  -3   2 1179.21   46.79
  -9  -3   2 1175.13   46.99
   9   3  -2 1172.02   47.04
   9   3  -2 1134.79   46.56
  -9   3   2 1145.42   46.70
   9  -3  -2 1197.23   46.89
   9  -3  -2 1211.88   46.94
  -9   3   2 1230.83   46.99
   4   2  -8  211.33    8.92
  -4   2   8  220.65    9.03
   4  -2  -8  223.16    9.43
   4  -2  -8  205.02    8.44
   4  -2  -8  199.15    9.17
   4  -2  -8  229.17    8.25
   4   2  -8  216.26    8.34
   4  -2  -8  219.81    8.92
   4   2  -8  170.97    7.93
   4   2  -8  218.91    9.46
   4   2  -8  199.65    9.61
  -4  -2   8  206.87    8.34
  10   2  -5    2.57    3.58
 -10   2   5    4.27    2.18
  10   2  -5    0.17    3.23
 -10  -2   5    7.62    1.08
 -10   2   5    2.52    2.35
  10   2  -5    3.49    1.67
  10   2  -5    3.05    2.69
  10   2  -5    2.17    2.55
 -10  -2   5   -0.82    2.38
  10  -2  -5    2.55    3.28
  10  -2  -5    5.86    2.25
 -10  -2   5    4.20    2.85
  10  -2  -5    2.71    3.37
 -10   2   5    4.13    2.66
  10  -2  -5    0.74    2.79
  -5   3  -4 2361.22   88.32
  -5  -3  -4 2432.43   88.08
   5  -3   4 2427.69   87.53
   5   3   4 2248.97   87.37
  -5  -3  -4 2341.12   87.49
  -5  -3  -4 2361.12   88.47
   5   3   4 2350.79   88.04
   5  -3   4 2337.69   87.71
  -5  -3  -4 2280.99   88.13
   5   3   4 2279.09   87.38
  -5   3  -4 2324.62   88.58
   5   3   4 2362.59   87.84
   5  -3   4 2431.87   88.10
  -5   3  -4 2277.44   87.74
  -5  -3  -4 2291.54   87.37
   5   3   4 2281.01   88.13
   5  -3   4 2326.61   87.26
  -5   3  -4 2231.94   87.52
  -5   3  -4 2314.45   87.35
  -5   3  -4 2324.56   88.24
   2  -4   4  955.38   37.38
  -2  -4  -4  983.48   38.11
   2  -4   4  964.99   37.13
   2  -4   4  967.33   37.83
   2  -4   4 1018.95   38.90
  -2  -4  -4  990.93   37.84
  -2   4  -4 1008.53   37.84
  -2   4  -4  994.12   38.13
   2   4   4  983.87   37.88
   2  -4   4 1008.71   37.73
  -2   4  -4 1028.13   38.19
   2   4   4 1082.54   37.67
  -2  -4  -4  936.78   37.54
  -2   4  -4  971.07   37.39
   2   4   4  887.06   37.05
  -2  -4  -4  878.33   38.06
   2   4   4  948.79   37.53
   4   4  -5  214.16    8.88
   4   4  -5  206.47    9.15
   4   4  -5  242.30    9.76
  -4  -4   5  208.29    9.44
  -4  -4   5  205.82    9.17
  -4  -4   5  217.35    9.67
  -4   4   5  213.12    8.43
  -4  -4   5  191.85    8.03
  -4  -4   5  183.83    8.03
   4  -4  -5  189.02    8.81
   4  -4  -5  198.48    9.00
  -4   4   5  210.49    9.33
   4  -4  -5  202.41    9.21
  -4   4   5  223.20    9.66
   4   4  -5  200.83    9.23
   3  -3  -7  497.67   19.47
  -3   3   7  523.34   19.41
   3  -3  -7  484.19   19.37
   3  -3  -7  492.06   18.84
   3  -3  -7  428.87   18.24
   3  -3  -7  496.62   19.15
  -3  -3   7  460.88   19.89
   3   3  -7  480.53   19.15
   3   3  -7  346.28   19.32
  -3  -3   7  500.38   19.44
  -3  -3   7  523.20   18.62
   3   3  -7  499.71   19.31
   3   3  -7  479.17   18.46
   6   4  -4 5682.48  208.67
  -6  -4   4 5708.59  208.41
  -6  -4   4 5839.68  208.84
  -6  -4   4 5018.91  208.08
  -6  -4   4 6004.89  209.35
   6  -4  -4 5990.92  208.99
   6   4  -4 5828.41  209.08
  -6   4   4 6084.14  208.79
   6  -4  -4 5774.38  208.60
   6  -4  -4 5526.51  208.96
  -6   4   4 4762.43  208.08
   6  -4  -4 6028.94  209.09
  -6   4   4 5704.19  208.93
   6   4  -4 5733.77  209.11
  11   1  -5   54.78    3.52
 -11   1   5   62.29    4.67
  11   1  -5   59.51    4.43
 -11   1   5   53.29    2.96
  11   1  -5   58.09    4.07
 -11  -1   5   47.27    4.13
 -11   1   5   64.47    3.93
  11  -1  -5   55.78    4.31
 -11  -1   5   39.53    3.86
  11  -1  -5   61.02    4.73
  11  -1  -5   51.63    4.79
 -11  -1   5   62.01    3.55
 -11   1   5   60.29    4.31
  11  -1  -5   70.20    4.37
  -9  -3   4 1439.14   57.90
  -9  -3   4 1540.23   58.17
   9   3  -4 1474.01   57.97
   9   3  -4 1510.25   58.96
   9   3  -4 1539.94   58.43
   9   3  -4 1554.06   58.22
  -9  -3   4 1581.97   58.44
   9   3  -4 1580.53   58.70
  -9  -3   4 1612.70   58.82
  -9   3   4 1532.63   58.45
   9  -3  -4 1522.83   58.53
   9  -3  -4 1563.46   58.96
  -9   3   4 1609.72   58.21
  -9   3   4 1516.07   58.86
   9  -3  -4 1534.17   58.08
   9  -3  -4 1499.14   58.76
  -9   3   4 1596.44   58.77
   9  -3  -4 1580.03   58.34
  -9   3   4 1370.07   57.87
   9  -3  -4 1567.46   58.77
  -9  -3   4 1477.16   58.88
   9   3  -4 1458.84   58.75
   9   3  -1   13.44    2.94
   9  -3  -1    5.29    2.72
  -9   3   1    9.21    3.51
  -9   3   1    3.44    2.95
  -9   3   1    8.19    3.42
   9  -3  -1    7.70    3.06
  -9   3   1    9.23    2.85
   9  -3  -1    7.61    3.93
  -9   3   1    3.86    3.11
  -9   3   1    7.00    2.92
   9  -3  -1    8.12    3.33
  -9  -3   1    8.58    3.47
   9  -3  -1    7.96    3.40
  -9  -3   1    3.87    2.45
   9   3  -1    5.57    3.34
  -9  -3   1    7.29    3.24
  -9  -3   1    7.22    2.87
   9   3  -1   11.50    2.97
   9   3  -1    9.17    3.18
  -9  -3   1    9.54    3.21
   9   3  -1    6.37    2.67
   2   2  -8 1054.28   37.29
   2   2  -8 1007.96   36.52
  -2  -2   8 1056.59   36.51
   2  -2  -8 1009.14   37.03
  -2   2   8 1014.94   36.62
   2   2  -8  997.99   36.39
   2   2  -8  933.78   35.82
   2  -2  -8  915.49   35.86
   2  -2  -8 1016.33   36.46
   2  -2  -8 1022.55   37.30
   2  -2  -8 1002.91   36.49
   2  -2  -8  981.95   36.15
  10   0  -7    1.06    0.64
  10   0  -7   -3.78    3.51
 -10   0   7    3.02    2.97
  10   0  -7    2.27    3.07
 -10   0   7   -0.81    2.07
  10   0  -7   -0.21    2.86
  10   0  -7   -1.06    1.54
  10   0  -7   -2.23    3.28
   5   3  -7  394.98   14.54
  -5  -3   7  394.26   14.46
  -5  -3   7  357.45   14.79
  -5   3   7  381.49   14.22
   5   3  -7  283.55   12.87
   5  -3  -7  370.88   13.93
  -5   3   7  372.64   14.61
   5   3  -7  379.19   14.55
   5   3  -7  377.94   14.28
  -5  -3   7  300.07   12.88
   5  -3  -7  367.78   14.10
   5  -3  -7  366.24   14.05
  -5   3   7  366.85   13.31
   5  -3  -7  369.82   13.33
   5   3  -7  401.88   14.06
  11  -1  -1  294.43   12.48
 -11   1   1  291.70   12.14
 -11  -1   1  299.54   12.33
 -11  -1   1  288.02   12.45
  11  -1  -1  293.11   12.40
 -11  -1   1  284.49   12.63
 -11   1   1  285.88   12.43
  11  -1  -1  281.67   12.76
  11  -1  -1  281.65   12.35
 -11  -1   1  282.69   12.75
  11   1  -1  311.57   12.41
 -11   1   1  280.19   12.46
  11   1  -1  284.35   12.79
  11   1  -1  274.03   12.50
   0   4  -5  122.42    6.86
   0   4  -5  150.14    6.10
   0   4   5  132.00    7.04
   0  -4  -5  151.49    6.35
   0  -4  -5  143.16    6.65
   0  -4   5  128.34    5.57
   0   4   5  148.10    6.33
   0  -4  -5  142.46    5.75
   0   4   5  139.93    5.42
   0   4   5  138.59    5.68
   0   4  -5  141.28    6.65
   0   4  -5  130.48    5.43
   0  -4   5   82.41    4.44
   0  -4   5  135.54    6.31
  -3   1  -7    8.45    2.57
   3   1   7    6.75    1.92
  -3  -1  -7   10.15    3.14
  -3  -1  -7    7.17    3.24
   3  -1   7    8.19    1.78
   3  -1   7    6.42    3.21
   3   1   7    6.49    4.13
  -3  -1  -7   10.22    2.09
   3   1   7    4.16    3.19
  -3   1  -7    9.00    3.99
  -3  -1  -7    8.43    2.25
  -3   1  -7    8.87    3.63
  -3  -1  -7    8.67    3.54
  -3   1  -7    5.16    1.45
   4  -4   3  594.11   23.33
   4   4   3  614.58   23.91
   4   4   3  613.77   23.29
   4   4   3  613.59   23.74
  -4  -4  -3  590.80   23.64
  -4   4  -3  640.87   24.17
   4   4   3  572.27   24.36
   4   4   3  591.46   23.53
   4  -4   3  650.20   25.00
  -4  -4  -3  627.17   23.87
  -4  -4  -3  499.33   24.09
   4  -4   3  613.68   23.42
  -4  -4  -3  596.08   24.08
  -4   4  -3  496.20   23.42
  -4  -4  -3  589.26   24.18
   4  -4   3  601.39   23.87
  -4   4  -3  650.57   24.67
  -4   4  -3  631.13   23.85
  -4  -4  -3  575.07   23.88
   4  -4   3  609.45   23.82
   1  -5   0  274.79   12.70
   1  -5   0  301.19   12.56
  -1   5   0  300.11   12.52
   1  -5   0  264.61   12.70
  -1   5   0  309.85   12.71
   1   5   0  300.25   12.53
  -1  -5   0  296.09   12.83
   1   5   0  283.52   12.74
  -1  -5   0  299.38   12.72
  -1   5   0  298.55   12.55
  -1  -5   0  284.36   12.52
   1  -5   0  297.10   12.74
   1   5   0  294.59   12.75
  -1  -5   0  308.00   12.96
   1   5   0  283.66   12.46
   6   2  -8  379.67   14.97
  -6   2   8  415.10   15.42
  -6  -2   8  376.64   16.43
   6   2  -8  432.73   16.30
  -6   2   8  431.67   16.10
   6  -2  -8  418.45   15.97
   6   2  -8  405.21   16.02
   6  -2  -8  389.10   15.26
   6  -2  -8  375.80   15.69
   6   2  -8  366.89   15.05
   6   2  -8  395.04   15.59
   6  -2  -8  427.26   15.42
  -6   4  -1 3416.39  126.39
   6  -4   1 3310.74  126.15
   6  -4   1 3720.81  126.76
   6   4   1 3243.64  125.76
   6   4   1 3441.76  126.10
   6   4   1 3256.50  126.23
   6   4   1 3360.70  125.94
  -6  -4  -1 3265.32  126.14
   6  -4   1 3477.09  126.08
  -6   4  -1 3341.56  126.17
   6   4   1 3434.56  126.05
   6   4   1 3269.46  126.11
  -6  -4  -1 3208.77  125.93
  -6  -4  -1 3236.01  125.96
  -6   4  -1 3310.18  125.85
  -6  -4  -1 3069.02  125.93
   6  -4   1 3316.84  125.80
  -6  -4  -1 2807.77  126.30
   6  -4   1 3152.98  126.36
   6  -4   1 3235.55  125.79
  -6  -4  -1 3179.69  125.85
  -6   4  -1 3380.09  126.13
  -6   4  -1 3293.87  126.00
  -1   5   1    3.76    2.81
   1   5  -1    9.92    3.44
  -1   5   1   13.01    3.41
   1   5  -1    6.43    2.98
   1  -5  -1   10.01    3.34
   1   5  -1   13.44    3.73
  -1  -5   1    6.00    3.22
   1   5  -1    4.00    2.27
  -1  -5   1   12.81    3.44
   1  -5  -1    7.59    3.56
  -1  -5   1    8.28    3.55
  -1   5   1    5.50    2.55
   1  -5  -1    3.70    3.23
  -1  -5   1   10.42    3.27
  10  -2   0   14.26    3.16
  10   2   0   20.11    3.96
 -10   2   0   18.13    3.73
  10   2   0    8.82    3.46
 -10  -2   0   12.83    3.27
 -10  -2   0    8.82    3.61
  10  -2   0   15.77    4.06
  10  -2   0   11.20    2.99
 -10  -2   0   11.10    3.26
 -10   2   0    8.50    3.28
  10   2   0    8.50    2.97
  10   2   0    9.54    3.03
 -10  -2   0    9.00    2.86
  10   2   0    8.87    2.58
  10  -2   0    7.19    3.05
 -10   2   0   10.70    3.19
 -10   2   0   14.04    3.40
  -4   2  -6  108.25    5.39
   4  -2   6  114.30    5.39
  -4   2  -6  116.30    7.42
   4  -2   6  121.37    6.10
  -4  -2  -6  106.26    5.09
  -4   2  -6  110.48    6.10
  -4  -2  -6  125.85    6.28
  -4   2  -6  114.83    5.26
  -4  -2  -6  115.83    6.18
   4  -2   6  112.53    5.48
   4   2   6  117.82    5.50
   4   2   6  114.85    6.66
   4   0  -9   -1.38    3.21
   4   0  -9   -0.17    3.59
   4   0  -9   -1.14    2.09
   4   0  -9    1.59    2.79
  -2   2  -7   35.70    2.64
  -2   2  -7   27.34    3.43
  -2   2  -7   28.60    4.48
  -2  -2  -7   29.63    3.30
   2  -2   7   40.20    3.56
   2   2   7   30.97    3.73
  -2  -2  -7   25.93    1.49
   2   2   7   30.85    2.73
  -2   2  -7   35.86    2.53
   2   2   7   30.32    4.01
  -2  -2  -7   29.16    1.90
   2  -2   7   33.78    2.95
  -2  -2  -7   28.04    3.09
   1  -3  -7  519.15   20.07
  -1   3   7  526.84   19.88
   1  -3  -7  546.78   20.77
  -1   3   7  515.26   20.18
   1  -3  -7  515.75   19.65
  -1  -3   7  525.54   20.22
   1   3  -7  514.43   20.51
  -1  -3   7  539.27   19.90
   1   3  -7  539.33   19.50
   1   3  -7  444.00   20.57
   1   3  -7  512.36   19.76
   1   3  -7  536.09   20.10
   1  -3  -7  477.26   19.59
  -5   1  -6   53.53    3.63
   5   1   6   42.66    2.90
  -5  -1  -6   40.64    3.48
  -5   1  -6   47.79    4.53
  -5   1  -6   36.60    4.52
   5  -1   6   48.89    5.68
   5  -1   6   51.00    2.70
  -5  -1  -6   52.82    3.98
   5  -1   6   53.07    3.58
   5   1   6   44.08    4.98
   5  -1   6   47.66    4.17
  -5   1  -6   36.75    5.73
  -5  -1  -6   45.85    4.25
  -1  -5  -1   -0.96    3.18
  -1  -5  -1    1.05    3.10
  -1   5  -1    4.08    3.38
   1   5   1    0.54    2.78
   1   5   1   -0.73    3.56
   1   5   1    0.14    3.68
   1  -5   1    0.99    3.48
  -1   5  -1    0.51    2.48
  -1  -5  -1   -1.18    3.20
   1  -5   1   -0.95    3.20
   1  -5   1   -1.69    3.43
   1   5   1    2.11    3.05
  -1  -5  -1    1.14    2.82
  -1   5  -1   -1.91    3.49
   8  -2   3  560.51   22.54
  -8  -2  -3  554.32   22.12
  -8  -2  -3  551.98   22.48
   8   2   3  571.68   22.12
  -8   2  -3  573.06   22.93
   8  -2   3  593.63   22.12
   8   2   3  539.97   21.72
  -8   2  -3  535.74   22.62
  -8  -2  -3  537.94   22.59
  -8   2  -3  550.87   22.86
   8   2   3  505.17   22.33
   8   2   3  544.71   22.49
   8  -2   3  554.85   21.92
   8  -2   3  595.88   23.20
   8   2   3  570.57   22.03
  -8   2  -3  541.84   22.12
   8  -2   3  536.14   21.69
  -8   2  -3  581.62   22.47
   8   2   3  532.27   22.61
  -8   0  -4 2062.15   77.95
  -8   0  -4 2090.78   77.86
   8   0   4 1954.71   77.20
   8   0   4 2038.11   78.45
   8   0   4 2036.10   77.83
   6   0  -9    1.60    2.58
   6   0  -9    1.47    2.55
   6   0  -9    0.27    3.06
   6   0  -9   -2.21    2.47
  -1  -1  -8   20.01    3.70
   1   1   8   20.87    4.27
  -1   1  -8   23.40    2.63
   1   1   8   21.80    2.29
  -1   1  -8   21.03    1.94
  -1   1  -8   19.98    3.43
  -1  -1  -8   16.80    3.95
  -1   1  -8   23.62    5.26
  -1   1  -8   20.85    4.41
  -1  -1  -8   20.68    2.29
   1  -1   8   16.33    2.90
   1   1   8   22.94    3.28
  -9  -3   5 1159.03   43.03
  -9  -3   5 1085.13   42.51
   9   3  -5 1002.39   42.84
  -9   3   5 1113.26   42.15
  -9   3   5 1223.70   42.95
   9  -3  -5 1152.97   42.66
   9  -3  -5 1048.45   42.01
   9   3  -5 1165.32   42.87
  -9   3   5 1094.65   42.63
   9  -3  -5 1155.26   43.06
   9   3  -5  933.61   43.01
   9  -3  -5 1086.79   42.90
   9   3  -5 1140.96   42.27
   9   3  -5 1035.17   41.85
   9   3  -5 1159.86   42.53
   9  -3  -5 1102.79   42.81
  -9  -3   5 1153.78   42.32
   9  -3  -5 1127.49   42.31
 -10   2   6   11.51    2.51
 -10   2   6    8.28    2.88
  10  -2  -6   11.43    2.55
  10  -2  -6   11.81    3.18
 -10  -2   6    7.90    2.90
  10   2  -6   10.64    3.00
  10  -2  -6    9.64    2.35
  10   2  -6   10.24    1.57
  10  -2  -6    9.34    3.47
 -10  -2   6    7.69    2.76
  10   2  -6    9.07    2.57
  10   2  -6   16.69    3.72
  10   2  -6    7.64    1.08
   1   5  -2   80.08    5.29
  -1  -5   2   87.13    5.19
   1  -5  -2   87.33    5.31
  -1   5   2   87.50    5.38
   1   5  -2   84.43    4.79
  -1  -5   2   78.41    5.10
  -1  -5   2   72.04    5.40
  -1   5   2   54.92    4.86
  -1   5   2   86.45    4.86
   1  -5  -2   93.50    5.45
   1  -5  -2   79.85    5.19
   1   5  -2   67.99    5.35
  -9  -3   0 4245.68  156.56
   9   3   0 3941.76  156.10
  -9  -3   0 4150.53  156.22
   9  -3   0 4072.95  156.04
   9   3   0 4080.34  156.26
  -9  -3   0 4168.21  156.61
   9   3   0 4049.67  156.15
  -9   3   0 4053.10  156.13
   9  -3   0 4020.09  156.16
   9   3   0 4083.58  156.16
  -9  -3   0 4159.11  156.10
  -9   3   0 4014.34  156.15
   9  -3   0 4068.10  156.18
   9   3   0 4036.72  156.35
  -9   3   0 4070.35  156.39
  -9   3   0 4017.12  156.53
  -9  -3   0 4135.29  156.22
   9  -3   0 4172.03  156.60
  -9  -3   0 4001.61  156.21
  -9   3   0 4122.74  156.22
 -11  -1   6  228.88    9.43
  11  -1  -6  215.71   10.09
  11   1  -6  224.69    9.37
 -11   1   6  220.49   10.26
 -11  -1   6  215.78   10.21
  11  -1  -6  236.01    9.69
  11   1  -6  224.68    9.73
 -11   1   6  222.59    9.02
  11  -1  -6  220.13    9.00
  11   1  -6  211.20    9.91
  11   1  -6  217.81   10.17
 -11   1   6  254.51   10.66
 -11  -1   6  214.98    9.86
  11  -1  -6  214.01   10.05
   6  -4  -5 1577.82   58.09
   6   4  -5 1458.48   57.69
   6   4  -5 1486.66   58.21
  -6  -4   5 1509.05   58.35
  -6  -4   5 1493.41   57.85
   6   4  -5 1486.89   58.02
   6  -4  -5 1580.49   57.98
  -6  -4   5 1488.90   57.31
  -6  -4   5 1461.08   58.18
  -6   4   5 1560.90   58.05
  -6   4   5 1419.36   57.65
   6  -4  -5 1461.60   57.55
   3   5  -1    0.24    3.05
  -3  -5   1   -0.19    2.76
  -3   5   1    1.67    3.41
   3   5  -1    0.83    2.65
   3   5  -1   -1.87    3.52
   3  -5  -1    1.14    3.20
   3  -5  -1   -0.54    3.50
   3   5  -1    6.09    3.86
   3  -5  -1    0.90    3.10
  -3   5   1   -1.66    3.32
  -3  -5   1    3.26    2.92
  -3   5   1    1.61    2.78
  -3  -5   1   -2.90    3.35
  -3  -5   1   -2.74    3.76
   3   5  -1    2.44    2.54
  -3   5   1    2.69    3.01
   5  -1  -9  466.20   19.27
   5  -1  -9  477.94   19.26
   5   1  -9  442.61   18.81
   5   1  -9  486.18   19.21
   5  -1  -9  464.58   18.79
   5   1  -9  503.67   19.41
   5   1  -9  465.23   19.52
  -5   1   9  513.90   19.26
   5   1  -9  536.50   18.92
   5  -1  -9  508.77   19.11
   5  -1  -9  495.99   19.49
   5  -1  -9  455.25   19.52
   5   1  -9  487.06   18.90
   2   0  -9    3.25    3.61
   2   0  -9   -1.81    3.29
   2   0  -9   -0.88    1.90
   2   0  -9    2.17    4.43
   2   0  -9   -1.00    2.04
  -2   0   9    1.22    2.88
  12   0  -3    0.59    3.10
  12   0  -3   -3.58    2.31
 -12   0   3   -2.57    2.95
 -12   0   3   -0.55    3.38
 -12   0   3   -1.24    1.88
  12   0  -3    3.81    3.59
 -12   0   4  513.52   20.66
  12   0  -4  523.63   21.67
 -12   0   4  583.27   21.02
  12   0  -4  543.34   21.50
 -12   0   4  532.37   21.70
 -12   0   4  570.28   21.79
  12   0  -4  532.03   21.71
 -12   0   4  492.76   21.89
   9  -1  -8 1371.18   48.30
   9   1  -8 1315.90   48.22
   9  -1  -8 1308.93   47.63
  -9  -1   8  945.62   47.86
   9  -1  -8 1370.85   47.59
   9  -1  -8 1353.31   48.24
   9  -1  -8 1413.76   48.09
   9  -1  -8  952.17   47.25
  -9   1   8 1415.31   48.13
   9   1  -8 1263.03   47.78
   9   1  -8 1305.91   47.36
   9   1  -8 1168.64   47.77
  -9  -1   8 1372.09   48.40
  -3  -5   0  272.52   12.31
   3  -5   0  290.62   12.50
  -3  -5   0  281.54   12.04
  -3  -5   0  253.31   12.50
  -3  -5   0  275.72   12.36
  -3   5   0  284.93   12.20
   3   5   0  255.18   12.14
   3  -5   0  295.42   12.25
   3   5   0  297.74   12.09
   3   5   0  307.96   12.69
  -3  -5   0  292.18   12.50
   3   5   0  278.71   12.27
  -3   5   0  309.28   12.34
   3   5   0  281.49   12.48
   3  -1  -9  555.22   22.55
   3  -1  -9  561.19   22.01
   3   1  -9  558.73   21.93
   3   1  -9  542.79   22.18
   3  -1  -9  564.47   22.15
  -3   1   9  581.17   22.31
   3   1  -9  539.99   23.04
  -3  -1   9  565.37   22.32
   3  -1  -9  511.84   23.08
   3   1  -9  559.94   22.31
   3  -1  -9  593.35   22.77
 -11  -1   0   13.84    3.53
 -11   1   0   14.94    3.25
 -11  -1   0   19.26    3.49
  11  -1   0   16.62    4.33
  11   1   0   11.91    3.67
 -11   1   0   11.32    3.69
 -11  -1   0   10.52    3.04
 -11   1   0   16.28    3.50
  11  -1   0   11.62    3.82
  11  -1   0   12.58    2.99
  11   1   0   15.37    3.03
 -11   1   0   18.13    3.86
  11  -1   0   10.57    3.33
  -6  -2  -512442.40  437.76
   6   2   510839.40  436.63
  -6  -2  -511698.00  437.09
   6  -2   512358.30  437.75
  -6   2  -511442.00  438.03
  -6  -2  -511627.50  437.68
   6   2   511774.20  437.21
  -6  -2  -511961.30  437.49
   6  -2   510638.80  436.59
  -6   2  -512380.70  437.19
   6   2   511111.00  437.75
  -6   2  -510441.30  438.02
   6  -2   511843.60  437.02
   6   2   512536.70  437.89
   6  -2   512427.10  437.19
  -6   2  -512186.40  437.58
 -10   0  -2 7208.55  274.23
 -10   0  -2 7314.64  274.33
  10   0   2 7410.04  274.50
 -10   0  -2 7117.35  274.44
 -10   0  -2 6552.94  274.57
  10   0   2 7335.02  274.29
  10   0   2 7256.13  274.39
  -4   0  -7    1.15    3.30
  -4   0  -7    2.86    2.98
   4   0   7    1.00    4.45
   4   0   7    3.36    3.31
   4   0   7    0.07    1.09
  -4   0  -7    3.96    3.58
  -4   0  -7    0.83    2.45
  -1   5  -2  244.35   10.54
  -1   5  -2  237.95   10.02
   1  -5   2  229.58   10.68
   1   5   2  227.11   10.14
  -1   5  -2  229.56   10.47
   1  -5   2  225.85   10.52
   1   5   2  224.04    9.73
   1  -5   2  221.41    9.95
   1  -5   2  232.88   10.43
  -1  -5  -2  227.25   10.27
  -1  -5  -2  221.04   10.45
  -1  -5  -2  210.50   10.36
   1   5   2  237.32   10.68
  -1  -5  -2  230.53   10.33
   7  -3   3  448.53   17.44
  -7  -3  -3  426.75   17.85
   7   3   3  428.50   17.21
   7   3   3  430.00   17.83
  -7   3  -3  424.31   18.33
   7   3   3  439.27   17.83
   7   3   3  432.96   17.13
  -7  -3  -3  423.93   17.78
  -7   3  -3  433.82   18.09
  -7  -3  -3  439.57   17.76
  -7   3  -3  435.80   18.03
   7  -3   3  433.33   17.31
  -7  -3  -3  387.14   17.05
  -7   3  -3  434.20   17.35
   7   3   3  434.42   17.52
   7  -3   3  449.99   18.85
   7  -3   3  434.02   17.81
   7  -3   3  450.45   18.66
   7  -3   3  399.19   16.97
  -7  -3  -3  448.54   18.15
  -3   5   2   -0.39    3.16
   3  -5  -2   -1.87    3.38
  -3   5   2    1.89    3.49
   3   5  -2    0.90    3.41
  -3  -5   2   -0.89    3.73
  -3  -5   2   -0.15    2.83
  -3  -5   2   -0.17    2.55
  -3   5   2    1.75    2.87
   3   5  -2   -1.74    2.98
  -3   5   2    1.64    2.89
   3  -5  -2   -0.15    2.89
   3  -5  -2   -5.19    3.21
   3  -5  -2    1.45    3.24
   3   5  -2    0.74    2.72
   9   1   3 2729.36  102.97
  -9   1  -3 2747.17  102.91
   9   1   3 2503.25  103.22
  -9   1  -3 2885.77  103.67
  -9  -1  -3 2734.93  102.99
   9  -1   3 2721.76  102.93
  -9  -1  -3 2664.42  103.03
  -9  -1  -3 2635.31  103.10
  -9   1  -3 2692.86  103.25
  -9   1  -3 2646.17  103.44
   9   1   3 2742.89  103.45
   9  -1   3 2641.71  103.57
   9  -1   3 2651.52  102.55
  -9  -1  -3 2578.22  103.29
   9   1   3 2622.59  103.02
   7   3  -7  950.09   33.84
  -7  -3   7  861.42   33.46
   7   3  -7  867.49   33.47
   7  -3  -7  948.01   34.33
   7   3  -7  930.12   34.56
   7  -3  -7  967.00   34.24
  -7   3   7  955.97   33.84
  -7  -3   7  905.80   34.69
   7  -3  -7  824.01   33.52
  -7   3   7  942.71   34.33
   7  -3  -7  921.60   34.12
   7  -3  -7  861.60   33.76
  -7   3   7  970.83   34.59
   0   2  -8  504.40   22.52
   0   2  -8  629.94   22.83
   0  -2   8  668.13   23.43
   0  -2  -8  643.47   23.55
   0   2  -8  632.21   23.25
   0  -2  -8  698.64   24.71
   0   2  -8  697.43   25.06
   0  -2  -8  661.20   24.17
   0   2  -8  663.48   24.53
   0  -2   8  719.16   23.79
   0   2  -8  629.13   23.47
   0   2   8  633.38   23.45
   0  -2  -8  625.53   23.32
   0   2   8  679.80   23.90
   0  -2   8  590.62   24.77
   0  -2  -8  475.11   22.62
   0   2   8  698.57   24.20
   0  -2  -8  620.85   22.69
   0  -2  -8  624.67   22.76
  12   0  -2  717.25   29.54
 -12   0   2  726.82   29.53
  12   0  -2  760.27   29.66
  12   0  -2  746.28   29.37
  -2   0  -8    9.37    2.97
  -2   0  -8    6.28    3.62
  -2   0  -8    5.30    4.95
   2   0   8    4.92    3.48
   2   0   8    2.66    1.24
  -2   0  -8    5.31    3.42
  -2   0  -8    7.37    1.22
   2   4  -6  688.01   25.04
  -2  -4   6  654.77   24.82
  -2   4   6  555.40   24.52
   2  -4  -6  593.18   25.59
  -2   4   6  681.01   25.60
   2  -4  -6  660.39   25.18
  -2   4   6  664.62   25.97
   2  -4  -6  663.62   25.44
  -2  -4   6  651.89   25.52
   2   4  -6  668.15   25.61
   2   4  -6  665.12   25.49
  -2  -4   6  634.94   26.20
  -4   4   6   53.64    4.30
   4  -4  -6   54.97    4.48
  -4  -4   6   53.10    5.07
   4   4  -6   70.37    3.87
  -4  -4   6   57.78    4.76
   4   4  -6   64.47    4.38
  -4   4   6   73.12    5.40
   4  -4  -6   57.47    3.95
  -4  -4   6   55.36    2.88
   4   4  -6   48.32    5.36
   4   4  -6   70.31    4.50
  -4   4   6   63.68    3.17
   4  -4  -6   61.45    4.35
   4  -4  -6   60.45    4.58
   6   4   2 2522.39   96.05
  -6   4  -2 2500.42   95.68
   6  -4   2 2511.41   95.88
   6  -4   2 2863.63   97.05
  -6  -4  -2 2433.08   95.95
  -6   4  -2 2498.41   96.42
   6   4   2 2396.80   95.89
  -6  -4  -2 2479.83   95.80
   6   4   2 2431.36   96.23
  -6   4  -2 2536.21   96.07
   6   4   2 2531.40   95.60
  -6   4  -2 2557.56   96.01
   6   4   2 2520.27   96.05
   6   4   2 2520.15   95.78
  -6  -4  -2 2481.53   96.19
   6  -4   2 2440.01   96.01
  -6  -4  -2 2410.38   95.66
  -6   4  -2 2529.00   96.15
   6  -4   2 2560.96   95.61
   6  -4   2 2397.69   95.61
  -6  -4  -2 2435.05   95.96
  12   0  -5   -2.12    3.57
 -12   0   5   -0.72    3.44
 -12   0   5   -0.42    3.69
  12   0  -5    1.01    2.84
  12   0  -5    2.42    3.00
 -12   0   5    1.42    1.77
  12   0  -5    3.30    2.82
  -3  -3  -6    0.50    0.92
  -3  -3  -6   -1.40    1.88
  -3   3  -6    0.23    4.17
  -3   3  -6    0.60    1.80
  -3  -3  -6   -3.88    2.86
  -3  -3  -6    0.36    2.55
   3   3   6   -2.80    3.45
   3  -3   6    1.46    2.80
   3   3   6    0.48    1.57
   3  -3   6    0.67    2.45
  -3  -3  -6   -1.49    3.82
  -3   3  -6    2.22    3.00
   3  -3   6    0.84    1.70
  -3   3  -6   -0.27    1.02
  -3   3  -6   -0.37    4.17
  -3   3  -6    0.81    2.15
  -3   3  -6   -0.51    4.49
   3   3   6   -3.93    2.55
  -3  -3  -6   -3.42    3.67
   3  -3   6    0.27    5.20
  -7   1  -5 1841.67   69.69
  -7  -1  -5 1919.74   69.35
  -7   1  -5 1840.27   69.28
   7   1   5 1742.76   68.55
   7   1   5 1561.28   68.94
  -7   1  -5 1859.07   70.28
   7  -1   5 1804.02   69.28
  -7  -1  -5 1871.65   69.97
   7  -1   5 1822.96   68.67
  -7   1  -5 1835.39   69.64
   7   1   5 1807.08   69.50
  -7  -1  -5 1686.98   69.57
   7  -1   5 1855.80   69.75
  -7  -1  -5 1841.53   69.45
   7   1   5 1845.63   70.04
   7  -1   5 1861.71   68.81
  10  -2   1  748.84   30.17
 -10  -2  -1  759.46   30.58
 -10  -2  -1  758.86   30.55
 -10   2  -1  763.86   30.76
  10   2   1  795.46   30.48
  10  -2   1  794.20   30.42
 -10   2  -1  762.07   30.40
 -10   2  -1  779.32   30.57
  10  -2   1  766.90   30.24
  10   2   1  801.87   30.90
  10  -2   1  762.21   31.00
 -10  -2  -1  763.34   30.45
  10   2   1  781.86   30.61
 -10  -2  -1  757.40   30.50
 -10  -2  -1  680.35   30.67
 -10   2  -1  814.91   30.77
  10   2   1  760.11   30.24
   1   5  -3 1008.45   37.30
   1  -5  -3  862.74   37.41
  -1  -5   3  990.17   37.78
   1   5  -3 1069.63   37.72
  -1  -5   3  895.30   37.83
  -1   5   3  958.71   37.36
  -1   5   3  901.26   36.81
  -1  -5   3  985.23   37.65
   1  -5  -3  959.91   37.37
   1   5  -3  946.19   37.54
  -8   4   2 1538.38   61.35
  -8   4   2 1619.99   61.19
  -8  -4   2 1576.58   61.49
  -8  -4   2 1576.84   60.97
   8   4  -2 1671.96   60.81
  -8   4   2 1543.14   60.96
   8   4  -2 1684.08   61.17
   8   4  -2 1557.47   61.34
  -8  -4   2 1495.00   60.71
   8  -4  -2 1525.77   61.29
   8   4  -2 1563.72   61.36
   8  -4  -2 1602.90   61.30
  -8  -4   2 1494.58   61.25
   8   4  -2 1483.19   61.09
  -8   4   2 1576.48   61.28
  -8  -4   2 1567.18   61.02
   8  -4  -2 1525.09   61.26
  -8  -4   2 1603.93   61.37
   8   4  -2 1587.65   61.04
  -8   4   2 1644.63   60.84
   8  -4  -2 1699.33   61.32
   8  -4  -2 1573.45   61.18
  -3  -5  -1   12.72    3.15
   3   5   1   16.08    2.98
   3   5   1   16.16    3.01
  -3   5  -1   15.34    2.81
  -3  -5  -1   12.80    3.22
   3   5   1   15.59    3.23
   3  -5   1   10.27    3.27
   3  -5   1   15.91    3.60
  -3  -5  -1   11.23    3.64
   3   5   1   21.86    4.11
  -3  -5  -1   18.31    3.39
  -3   5  -1   20.53    3.78
   3  -5   1   16.52    3.75
  -8   2   8  580.68   22.28
  -8  -2   8  622.75   22.40
   8  -2  -8  550.74   21.65
   8   2  -8  595.84   21.39
   8   2  -8  492.92   20.92
   8   2  -8  518.80   22.10
   8  -2  -8  521.21   21.11
   8   2  -8  596.54   22.40
   8   2  -8  549.96   22.16
  -8   2   8  511.37   21.47
   8  -2  -8  544.57   21.43
   8   2  -8  556.80   21.36
   8  -2  -8  589.22   22.21
   8  -2  -8  596.97   21.76
  -2  -4  -5  127.52    7.24
  -2   4  -5  138.74    7.87
  -2   4  -5  109.80    7.20
  -2  -4  -5  129.42    6.16
  -2   4  -5  128.75    5.83
  -2   4  -5  138.09    6.48
   2   4   5  147.01    6.49
   2  -4   5  120.10    6.32
   2  -4   5  120.20    5.43
   2   4   5  128.67    6.02
  -2   4  -5  135.62    7.43
  -2  -4  -5  134.10    6.67
   2  -4   5  144.25    7.94
  -2  -4  -5  128.77    6.12
   2  -4   5  134.35    6.74
   2   4   5  129.33    6.61
  -8  -4   3  169.93    8.89
   8   4  -3  183.04    8.40
   8   4  -3  184.65    8.21
   8   4  -3  152.69    8.39
  -8  -4   3  188.82    7.72
   8   4  -3  165.73    8.92
  -8  -4   3  182.11    8.17
   8   4  -3  167.86    8.69
  -8   4   3  182.57    8.52
   8   4  -3  184.76    8.87
  -8   4   3  185.63    7.95
  -8   4   3  186.13    8.63
   8  -4  -3  189.15    8.24
   8  -4  -3  186.84    8.60
   8  -4  -3  179.31    8.64
  -8   4   3  189.19    8.60
   8  -4  -3  196.93    8.76
  -8   4   3  180.92    7.92
  -8  -4   3  174.75    8.31
  -8  -4   3  195.42    8.80
   7   1  -9   40.63    3.95
   7   1  -9   39.67    4.08
   7   1  -9   36.29    3.50
   7   1  -9   32.41    2.85
   7  -1  -9   38.86    3.88
   7  -1  -9   41.18    3.27
  -7  -1   9   40.91    4.45
  -7   1   9   46.05    3.47
   7  -1  -9   41.28    3.74
   7   1  -9   36.75    3.89
   7   1  -9   49.31    3.18
   7  -1  -9   32.55    3.84
   7  -1  -9   34.48    3.26
  -6   0  -6 1122.52   42.07
   6   0   6 1121.98   40.65
  -6   0  -6 1061.07   41.29
   6   0   6 1103.32   42.23
   6   0   6 1104.18   41.39
  -6   0  -6 1094.84   41.46
   6   0   6 1117.08   41.89
   6   0   6  985.60   40.42
  -6   0  -6 1112.76   41.75
 -10   0   8 3732.81  127.08
  10   0  -8 3920.79  126.87
  10   0  -8 3426.36  126.81
  10   0  -8 3660.77  125.95
  10   0  -8 3624.54  126.82
  10   0  -8 3731.89  126.62
   3  -5  -3 2529.15   92.65
  -3   5   3 2457.58   92.66
   3   5  -3 2318.21   92.47
  -3   5   3 2460.56   92.71
  -3  -5   3 2361.12   92.00
  -3  -5   3 2392.12   92.71
   3  -5  -3 2430.12   92.53
   3  -5  -3 2374.13   92.55
   3  -5  -3 2322.19   92.84
   3   5  -3 2430.20   92.53
   9  -3  -6  485.06   17.25
  -9  -3   6  457.22   17.00
   9  -3  -6  460.87   17.40
   9   3  -6  450.63   16.95
   9   3  -6  499.25   17.53
  -9  -3   6  468.27   17.64
   9  -3  -6  445.09   16.60
   9  -3  -6  321.35   16.27
  -9   3   6  472.21   17.36
  -9   3   6  461.63   17.32
   9   3  -6  464.85   16.72
  -8   4   1    3.91    2.83
   8   4  -1    8.05    3.74
  -8  -4   1    3.62    3.49
   8  -4  -1    5.15    3.29
  -8  -4   1    4.22    3.04
   8  -4  -1    2.48    3.45
   8   4  -1   10.23    2.91
   8  -4  -1    3.40    3.46
   8  -4  -1    6.29    3.18
  -8   4   1    4.87    2.85
   8  -4  -1    7.48    3.28
  -8   4   1    2.89    2.96
  -8  -4   1    8.77    2.78
  -8   4   1    3.11    3.41
  -8  -4   1    7.54    3.20
  -8   4   1    7.92    3.01
  -8  -4   1    3.87    3.26
   8   4  -1    3.86    3.25
  -8  -4   1    8.22    2.89
   8   4  -1    5.34    2.99
   8   4  -1    2.97    3.07
   8   4  -1    5.03    2.52
  -8   0   9   -1.87    3.02
   8   0  -9    1.01    3.12
   8   0  -9    0.12    3.00
   8   0  -9    2.53    2.65
   8   0  -9    2.76    2.43
   8   0  -9    0.58    2.39
   8   0  -9    0.53    2.79
  -1  -3  -7  499.53   19.54
   1  -3   7  533.67   19.66
   1  -3   7  510.49   19.59
  -1  -3  -7  490.04   19.00
  -1   3  -7  525.98   19.55
  -1   3  -7  486.94   18.72
   1   3   7  536.29   19.67
  -1   3  -7  510.84   20.36
  -1   3  -7  545.29   19.49
  -1  -3  -7  521.82   19.44
  -1   3  -7  415.38   18.64
   1   3   7  506.79   19.66
  -4  -4  -4  108.65    6.51
   4  -4   4  101.56    5.80
  -4  -4  -4  105.76    6.30
  -4  -4  -4  109.94    5.60
   4  -4   4   99.37    5.31
  -4   4  -4  120.45    6.91
   4  -4   4  118.18    7.47
  -4   4  -4  122.76    6.89
   4  -4   4  106.86    5.15
  -4  -4  -4  119.24    6.11
   4   4   4  114.88    6.09
  -4  -4  -4  112.64    5.80
   4  -4   4  113.19    6.18
  -4   4  -4  110.72    5.26
  -4   4  -4  114.73    5.71
   4   4   4  130.36    5.55
  -4  -4  -4  104.71    6.38
   4   4   4  111.20    5.01
   4   4   4  108.60    5.80
  -9   3  -1  651.57   25.74
   9  -3   1  662.45   25.48
  -9  -3  -1  634.60   25.56
  -9  -3  -1  569.23   25.23
  -9   3  -1  674.72   25.78
   9  -3   1  681.13   26.31
  -9   3  -1  626.29   25.88
   9   3   1  670.41   25.69
  -9  -3  -1  634.21   25.66
   9   3   1  632.26   25.43
  -9   3  -1  501.95   25.72
   9  -3   1  631.55   25.26
  -9  -3  -1  660.90   25.79
  -9  -3  -1  647.70   25.97
   9  -3   1  652.04   25.78
   9  -3   1  672.55   25.49
  -9   3  -1  655.26   25.46
   9   3   1  642.10   25.79
   9   3   1  647.46   25.62
   9   3   1  643.93   25.36
  -5   3  -5  855.38   31.96
  -5   3  -5  822.16   33.00
  -5   3  -5  900.02   32.57
  -5  -3  -5  774.38   31.73
   5  -3   5  871.45   32.66
  -5   3  -5  780.97   33.23
  -5  -3  -5  894.89   32.62
   5   3   5  826.63   32.30
  -5   3  -5  797.71   32.14
   5   3   5  857.47   31.82
   5   3   5  783.39   31.71
   5  -3   5  820.87   31.92
   5  -3   5  838.93   32.21
   5   3   5  830.66   32.61
   5  -3   5  822.30   31.55
  -5  -3  -5  844.93   31.81
  -5  -3  -5  771.85   33.03
   5   3   5  832.37   32.79
  -5  -3  -5  822.92   32.78
  12   0  -1   -1.66    3.13
 -12   0   1   -1.58    3.44
  12   0  -1   -3.32    4.16
 -12   0   1    1.21    3.22
  12   0  -1    0.82    3.69
 -12   0   1   -2.11    3.27
   1  -1  -9   12.75    2.49
   1  -1  -9   10.27    3.96
   1   1  -9   15.15    2.09
   1  -1  -9    8.71    3.22
   1   1  -9   10.87    4.20
   1   1  -9    7.94    2.30
   1  -1  -9   16.36    2.35
   1   1  -9   11.70    4.89
  -1   1   9    8.03    3.09
  -1  -1   9   10.89    3.10
  -1   1   9   13.71    2.45
   1   1  -9   16.81    3.50
   1   1  -9   11.96    1.59
  10  -2  -7  297.17   12.32
 -10  -2   7  276.19   12.29
 -10   2   7  282.24   11.58
  10  -2  -7  304.07   12.32
  10  -2  -7  291.24   11.29
  10   2  -7  243.02   10.74
  10   2  -7  279.10   11.53
  10   2  -7  291.39   12.26
  10   2  -7  267.23   12.42
 -10  -2   7  260.21   11.89
  10  -2  -7  308.28   11.38
  10  -2  -7  298.13   12.07
 -10   2   7  305.01   11.99
  10   2  -7  249.23   11.53
  10   2  -7  271.24   10.73
 -10  -2   7  273.29   11.57
   8   4  -4   50.80    4.53
   8   4  -4   45.55    3.49
  -8  -4   4   50.36    4.69
  -8  -4   4   42.58    2.52
   8  -4  -4   50.83    3.38
  -8   4   4   52.69    4.42
  -8   4   4   53.39    2.95
  -8   4   4   49.55    4.39
   8   4  -4   43.17    4.30
   8  -4  -4   52.04    4.57
  -8  -4   4   46.12    3.64
   8  -4  -4   48.85    4.33
   8  -4  -4   42.58    3.96
  -8   4   4   47.10    3.24
   8   4  -4   44.69    3.75
  -8  -4   4   52.95    3.71
   8   4  -4   40.20    4.64
  -8  -4   4   12.74    4.16
   8  -4  -4   46.54    4.48
  -8   4   4   46.29    3.89
  11  -1  -7 2998.70  117.62
 -11  -1   7 3111.13  118.77
 -11  -1   7 3044.05  118.25
 -11   1   7 3159.49  118.62
  11   1  -7 3047.20  117.86
  11  -1  -7 3068.55  118.47
  11   1  -7 3022.15  118.26
  11  -1  -7 3254.02  118.62
 -11  -1   7 3137.96  118.09
  11   1  -7 3230.31  117.97
  11   1  -7 2968.34  118.46
  11   1  -7 3228.40  118.50
  11  -1  -7 3091.43  118.56
  11  -1  -7 3004.22  118.04
   1  -5   3  810.30   33.00
   1  -5   3  807.90   32.39
  -1  -5  -3  795.71   32.79
  -1   5  -3  835.14   32.41
   1   5   3  774.86   32.69
  -1  -5  -3  809.68   32.89
  -1  -5  -3  893.19   33.02
   1   5   3  879.44   32.11
   1   5   3  822.88   32.23
  -1   5  -3  894.13   32.84
   1   5   3  838.99   32.56
   1  -5   3  831.31   32.80
   1  -5   3  974.22   32.31
  -1   5  -3  893.54   32.94
  -1  -5  -3  852.74   32.61
   1  -5   3  772.08   33.19
   0  -4  -6   77.05    4.44
   0  -4  -6   75.90    5.13
   0   4   6   80.56    4.38
   0   4   6   75.99    4.83
   0  -4  -6   70.88    5.58
   0   4   6   71.49    6.17
   0  -4   6   89.18    4.55
   0   4  -6   82.96    4.10
   0  -4   6   77.41    5.19
   0   4  -6   79.18    5.80
   0   4  -6   86.23    4.97
   0  -4  -6   80.15    4.08
   0   4   6   83.69    4.41
  12   0  -6  109.83    5.44
 -12   0   6  107.70    6.13
  12   0  -6  107.15    6.09
  12   0  -6  114.83    5.83
 -12   0   6  108.84    6.14
 -12   0   6   93.74    4.61
  12   0  -6  103.41    5.72
   3   3  -8  179.35    8.19
   3   3  -8  185.80    9.07
   3  -3  -8  178.26    8.65
   3  -3  -8  168.63    8.71
   3  -3  -8  173.53    7.26
  -3   3   8  175.31    8.26
   3   3  -8  172.96    7.47
   3   3  -8  158.64    8.52
   3  -3  -8  181.08    8.29
  -3  -3   8  182.99    7.58
  -3  -3   8  178.89    8.47
   3  -3  -8  177.14    7.71
  -3  -3   8  146.50    9.31
   6   4  -6  798.63   32.39
   6  -4  -6  836.25   32.28
  -6   4   6  823.90   31.69
  -6  -4   6  785.08   32.66
  -6  -4   6  878.17   32.59
   6   4  -6  883.36   32.02
  -6  -4   6  796.37   31.35
  -6  -4   6  795.67   32.12
   6   4  -6  828.68   32.49
   6   4  -6  829.22   32.40
  -6   4   6  837.34   32.46
   6  -4  -6  713.87   32.16
   6  -4  -6  811.99   32.10
   6  -4  -6  768.18   31.69
  -6   4   6  869.17   32.42
   5  -3  -8 1247.42   42.90
   5   3  -8 1156.77   41.82
   5  -3  -8 1287.68   42.06
   5  -3  -8 1312.33   42.67
   5   3  -8  777.95   41.60
   5   3  -8 1329.77   42.77
   5   3  -8 1300.99   43.00
  -5  -3   8  879.78   43.11
  -5  -3   8 1232.99   41.89
   5  -3  -8 1327.49   43.20
  -5   3   8 1389.04   42.11
   5   3  -8 1415.52   43.41
   5   3  -8 1308.17   43.24
   5  -3  -8 1315.08   42.88
  -5   3   8 1374.75   43.24
   0   0  -9   -1.58    5.40
   0   0  -9    2.35    1.48
   0   0   9    0.79    3.06
   0   0  -9    4.19    3.62
   0   0  -9   -1.34    1.49
   0   0  -9   -0.49    2.97
   0   0  -9    0.71    3.37
 -11   1  -1  646.34   26.61
 -11   1  -1  669.15   26.80
  11   1   1  643.99   26.52
  11  -1   1  656.25   26.87
 -11  -1  -1  627.18   26.42
  11  -1   1  684.27   26.58
  11   1   1  663.02   26.47
 -11   1  -1  652.20   26.35
 -11   1  -1  668.23   26.43
  11  -1   1  669.22   26.73
  11  -1   1  659.47   26.34
 -11  -1  -1  648.46   26.41
   4   2  -9  146.22    7.81
  -4   2   9  158.39    7.15
   4  -2  -9  154.25    7.09
   4   2  -9  151.63    7.62
  -4  -2   9  145.42    6.57
   4  -2  -9  157.76    6.37
   4   2  -9  149.90    6.92
   4   2  -9  141.63    6.56
  -4  -2   9  148.02    8.31
   4  -2  -9  147.47    6.66
   4  -2  -9  148.21    7.65
   4   2  -9  125.14    6.00
   4  -2  -9  150.76    7.54
   3   5   2  524.61   18.74
  -3   5  -2  528.70   17.92
  -3   5  -2  503.51   18.16
   3  -5   2  486.49   17.55
   3   5   2  511.83   17.88
   3   5   2  487.78   17.60
   3   5   2  503.00   17.98
  -3  -5  -2  492.58   18.50
   3   5   2  439.51   18.14
   3  -5   2  513.58   17.91
  -3  -5  -2  495.67   18.10
   3  -5   2  494.30   18.72
  -3  -5  -2  525.70   18.16
   3  -5   2  510.13   18.28
  -3  -5  -2  505.10   18.38
  -5   5   1  462.81   18.62
   5  -5  -1  489.93   18.79
   5   5  -1  450.18   18.87
   5   5  -1  416.65   18.96
  -5  -5   1  471.95   18.46
   5   5  -1  459.80   18.75
  -5  -5   1  445.14   18.97
  -5   5   1  451.31   18.97
   5   5  -1  427.10   18.80
  -5   5   1  471.98   18.83
  -5   5   1  467.37   18.87
  -5  -5   1  443.58   18.83
   5  -5  -1  460.69   19.13
   5   5  -1  457.92   18.81
   5  -5  -1  451.21   18.91
   5  -5  -1  482.22   18.98
  -5  -5   1  458.05   18.59
  -8   4   0 1735.27   67.69
   8  -4   0 1733.36   67.61
   8  -4   0 1724.40   67.52
   8  -4   0 1752.50   67.80
  -8  -4   0 1664.71   67.55
   8  -4   0 1930.41   68.19
  -8   4   0 1751.12   67.55
   8  -4   0 1669.74   67.92
  -8  -4   0 1771.34   67.66
   8   4   0 1616.53   67.62
   8   4   0 1819.87   67.83
  -8   4   0 1787.89   67.49
   8   4   0 1735.86   67.73
  -8   4   0 1826.41   68.03
   8   4   0 1732.75   67.47
   8   4   0 1748.17   67.47
  -8   4   0 1853.02   67.86
   8   4   0 1756.77   67.58
  -8  -4   0 1749.42   67.43
  -8  -4   0 1726.34   67.61
   8  -4   0 1734.79   67.44
  -8  -4   0 1759.81   67.99
  -8  -4   0 1683.77   67.53
  -5  -5   2    7.82    2.48
   5   5  -2   13.87    3.30
  -5   5   2   16.90    3.07
   5   5  -2    9.73    3.39
  -5   5   2   17.92    2.87
  -5   5   2   15.34    3.13
   5  -5  -2   14.38    3.78
  -5  -5   2   11.89    2.90
   5  -5  -2   11.59    3.64
  -5  -5   2   15.13    4.03
  -5  -5   2   11.21    3.53
   5   5  -2   15.42    3.77
   5  -5  -2   10.89    3.41
  -5   5   2    7.72    3.70
  -5   5   2   15.14    3.18
   5   5  -2   12.72    3.42
  -5  -5   2   11.05    3.66
   5  -5  -2   13.04    3.67
  -8  -2  -4 1836.96   71.51
  -8  -2  -4 1844.10   71.78
   8  -2   4 1942.62   71.54
  -8   2  -4 1910.04   71.55
   8  -2   4 1959.57   72.66
   8   2   4 1831.69   71.43
   8   2   4 1878.91   72.07
  -8   2  -4 1956.04   71.89
  -8   2  -4 1813.27   72.32
   8   2   4 1809.63   71.86
   8  -2   4 1855.85   72.01
  -8  -2  -4 1814.05   71.90
  -8   2  -4 1799.27   72.08
   8  -2   4 1813.78   71.27
   8  -2   4 1835.90   71.03
   8   2   4 1922.16   71.52
  -8   2  -4 1919.72   72.37
   8   2   4 1802.40   71.03
  -8  -2  -4 1799.75   72.00
   6   2  -9    6.13    2.98
   6  -2  -9   14.77    3.25
   6   2  -9   14.26    2.08
   6   2  -9   12.59    4.12
  -6   2   9   15.15    3.31
   6   2  -9   17.60    3.97
   6  -2  -9   11.31    3.51
   6  -2  -9    9.46    3.15
  -6   2   9   13.75    2.34
   6  -2  -9   11.62    2.54
  -6  -2   9   11.57    4.34
   6   2  -9    9.43    1.79
   6  -2  -9   11.97    2.34
  -1   5   4   14.78    3.48
   1   5  -4   17.29    4.25
  -1  -5   4   14.76    3.58
  -1   5   4   11.55    2.22
   1  -5  -4   15.22    3.07
   1  -5  -4   20.82    3.60
   1   5  -4   15.51    3.23
  -1   5   4   13.47    2.89
   1   5  -4   12.45    2.68
   1   5  -4   18.50    4.06
  -1  -5   4   13.94    4.08
  -1   5   4   16.25    4.33
  -3   5   4  508.36   19.91
   3  -5  -4  489.41   19.87
  -3   5   4  450.13   18.91
   3   5  -4  506.32   19.75
   3   5  -4  484.89   19.88
  -3  -5   4  495.97   20.09
  -3  -5   4  492.04   20.16
   3  -5  -4  480.81   20.10
  -3  -5   4  498.90   19.07
  -3   5   4  477.48   20.16
  -3   5   4  499.02   19.39
   3  -5  -4  499.91   19.89
   5  -5   0  419.13   17.31
   5   5   0  431.58   17.53
  -5  -5   0  381.82   17.24
  -5   5   0  433.89   17.25
  -5  -5   0  404.11   16.99
   5   5   0  414.86   17.18
  -5  -5   0  406.37   17.28
   5   5   0  427.09   17.03
  -5   5   0  415.90   17.11
  -5   5   0  415.08   17.44
   5  -5   0  433.26   17.17
   5  -5   0  406.37   17.05
  -5  -5   0  393.27   17.02
   5  -5   0  427.10   17.62
  -5   5   0  447.93   17.49
   5   5   0  398.40   17.17
   5  -5   0  417.27   17.64
  -5   5   3   32.42    3.50
  -5  -5   3   31.93    4.27
   5   5  -3   30.43    3.80
  -5   5   3   27.90    3.62
  -5  -5   3   29.92    2.78
  -5  -5   3   33.85    4.30
   5   5  -3   34.99    4.73
   5  -5  -3   31.55    4.14
   5  -5  -3   30.85    4.00
   5   5  -3   32.60    3.84
  -5   5   3   37.00    3.57
  -5  -5   3   31.08    3.92
  -5   5   3   29.05    2.88
   5   5  -3   27.24    4.16
   5  -5  -3   34.10    4.12
  -5  -5   3   36.56    3.11
   5   5  -3   31.68    3.47
  -5   5   3   36.16    4.31
   5  -5  -3   30.09    3.61
  -5   5   3   30.04    3.48
   8  -4  -5 3933.38  146.26
  -8   4   5 3356.68  145.19
  -8   4   5 4028.97  146.08
   8  -4  -5 3875.70  145.59
  -8  -4   5 3843.25  146.45
   8   4  -5 4016.76  145.69
   8   4  -5 3947.86  146.22
  -8  -4   5 3833.14  145.91
   8  -4  -5 3922.64  146.17
   8  -4  -5 4003.69  146.22
   8   4  -5 3907.96  145.75
  -8  -4   5 3853.97  145.67
  -8   4   5 3857.42  146.10
   8  -4  -5 4577.93  146.99
   8   4  -5 3912.25  146.38
   6  -4   3   91.37    5.54
  -6   4  -3  100.32    5.00
  -6  -4  -3   90.90    5.37
   6  -4   3   93.12    4.98
   6  -4   3   88.99    7.43
  -6   4  -3  107.76    6.66
   6  -4   3   99.80    5.79
  -6  -4  -3   95.14    5.99
   6  -4   3   97.68    5.01
  -6  -4  -3   98.31    6.27
  -6  -4  -3  100.94    4.99
   6   4   3   94.10    5.07
   6   4   3   92.71    4.88
   6   4   3   95.08    5.83
   6   4   3   87.06    5.63
  -6  -4  -3   92.80    5.80
  -6  -4  -3   90.59    6.11
   6   4   3   91.76    5.88
  -6   4  -3   89.70    6.31
  -6   4  -3   97.50    5.47
  -6   4  -3  118.81    6.43
   2   2  -9 8408.36  319.17
   2  -2  -9 9043.85  319.48
   2  -2  -9 8408.36  317.94
   2   2  -9 8732.25  318.52
  -2   2   9 8847.61  318.65
   2  -2  -9 9055.57  319.06
   2   2  -9 8197.38  317.92
   2  -2  -9 8745.04  318.48
   2   2  -9 8404.44  318.43
   2  -2  -9 8307.48  318.11
   2  -2  -9 8175.09  318.54
   2   2  -9 8549.75  318.03
  -2  -2   9 8819.88  318.58
  12   2  -3 1168.81   45.49
  12   2  -3 1165.90   45.99
 -12   2   3 1145.86   45.86
  12  -2  -3 1166.48   45.88
 -12   2   3 1166.72   45.36
 -12  -2   3 1255.34   45.75
 -12   2   3 1250.39   45.22
 -12   2   3 1167.04   46.08
  12   2  -3 1153.15   45.76
 -12  -2   3 1174.44   45.80
  12   2  -3 1086.16   45.81
 -12  -2   3 1135.36   45.08
 -12  -2   3 1191.37   45.42
  12  -2  -3 1239.29   45.99
  12  -2  -3 1208.17   45.99
  12  -2  -3 1167.16   46.08
 -12  -2   3 1035.20   45.75
 -12   2   3 1166.96   45.74
  12  -2  -3 1177.15   45.91
 -12  -2   4 1138.60   42.43
  12  -2  -4 1098.83   42.70
 -12  -2   4 1053.34   42.80
  12   2  -4 1054.66   42.12
  12   2  -4 1132.61   42.53
  12   2  -4 1023.47   42.62
  12  -2  -4 1136.04   42.72
 -12  -2   4 1036.07   41.62
  12   2  -4 1065.51   42.77
 -12   2   4 1123.98   42.43
 -12  -2   4 1086.44   42.51
  12  -2  -4 1116.89   42.86
 -12   2   4 1143.44   42.08
 -12   2   4 1047.06   42.79
  12  -2  -4 1112.90   42.54
  12   0   0  238.82   10.81
  12   0   0  243.74   10.92
  12   0   0  241.32   11.19
  12   0   0  246.81   11.46
 -12   0   0  239.75   11.15
 -12   0   0  233.26   11.05
 -12   0   0  256.03   11.00
 -12   0   0  234.13   11.04
 -10   0  -3   -2.75    3.86
  10   0   3   -1.60    3.08
  10   0   3   -1.99    3.50
 -10   0  -3    0.83    3.36
  10   0   3    1.55    3.84
 -10   0  -3   -2.17    3.72
   1   3  -8  323.54   15.22
  -1   3   8  361.64   14.52
  -1  -3   8  363.24   14.75
   1  -3  -8  358.07   14.25
   1  -3  -8  334.44   14.05
   1  -3  -8  339.54   15.24
   1   3  -8  348.46   14.31
  -1  -3   8  393.36   14.58
   1   3  -8  361.79   14.60
   1   3  -8  341.44   13.84
  -1  -3   8  410.06   16.29
   1  -3  -8  336.08   14.49
   1  -3  -8  355.20   15.43
   1   3  -8  338.46   15.41
  -1   3   8  342.27   14.66
 -10  -2  -2  385.29   16.32
  10   2   2  403.98   16.55
  10  -2   2  392.26   16.04
  10  -2   2  411.62   16.29
 -10   2  -2  387.60   16.85
  10   2   2  406.41   16.94
  10  -2   2  402.87   17.15
 -10   2  -2  387.43   16.67
  10   2   2  388.76   15.92
 -10   2  -2  418.25   16.91
  10  -2   2  390.29   15.91
 -10   2  -2  382.46   16.22
  10   2   2  378.44   16.27
 -10   2  -2  384.08   16.75
 -10  -2  -2  390.02   16.55
 -10  -2  -2  356.78   16.59
  -4   2  -7   34.95    5.73
  -4   2  -7   30.14    2.51
   4  -2   7   30.86    3.70
   4   2   7   28.01    4.45
  -4   2  -7   28.18    4.06
   4  -2   7   27.50    2.79
   4  -2   7   19.15    2.78
   4   2   7   23.69    2.75
  -4  -2  -7   23.94    2.40
  -4  -2  -7   36.21    4.11
  -4  -2  -7   31.05    3.83
  -4   2  -7   30.71    2.94
  -8   0  -5    1.16    3.65
   8   0   5    0.70    3.23
  -8   0  -5   -0.21    3.52
  -8   0  -5    3.01    2.91
   8   0   5   -1.93    4.65
   8   0   5    1.42    1.59
  -7  -3  -4  774.26   32.03
   7   3   4  804.66   32.69
  -7  -3  -4  804.75   32.94
  -7   3  -4  820.72   33.22
   7  -3   4  811.41   32.12
  -7  -3  -4  826.78   32.66
   7   3   4  807.75   31.80
  -7   3  -4  819.24   32.11
  -7   3  -4  866.32   32.95
   7   3   4  836.01   32.33
  -7   3  -4  805.59   32.96
   7   3   4  815.43   31.95
   7  -3   4  849.24   33.56
   7  -3   4  841.88   32.08
   7  -3   4  838.10   32.71
   7  -3   4  825.88   31.69
   7   3   4  819.92   32.72
  -7   3  -4  797.09   32.16
  -3   1  -8  254.09   10.18
  -3  -1  -8  238.94   10.09
  -3   1  -8  247.17   11.43
   3  -1   8  247.15    9.64
   3  -1   8  241.97   10.87
  -3  -1  -8  252.20   11.07
  -3  -1  -8  245.40   11.11
  -3  -1  -8  254.06   10.76
   3   1   8  220.34    9.79
  -3   1  -8  223.18    9.52
   3   1   8  242.47   11.39
   3   1   8  242.00   11.05
  -3   1  -8  240.82   10.94
   9  -1  -9   23.03    3.37
  -9   1   9   28.29    3.38
  -9  -1   9   19.79    3.42
   9  -1  -9   17.98    2.42
   9   1  -9   22.96    2.48
   9  -1  -9   25.34    3.68
   9   1  -9   24.09    2.95
   9   1  -9   21.86    3.80
   9  -1  -9   18.63    3.85
  -9  -1   9   10.95    3.61
   9   1  -9   15.36    3.04
   9  -1  -9   21.72    2.69
   9   3  -7  658.31   20.32
   9   3  -7  674.00   21.56
   9   3  -7  659.46   20.96
   9  -3  -7  701.20   20.81
  -9   3   7  642.41   20.90
   9  -3  -7  544.54   19.74
  -9   3   7  652.95   21.39
  -9  -3   7  644.22   20.36
   9  -3  -7  677.79   21.35
   9  -3  -7  636.34   20.76
  -9   3   7  675.77   20.83
   9   3  -7  667.86   20.18
  -9  -3   7  661.50   21.43
   7   3  -8  530.90   21.38
   7   3  -8  574.90   22.58
   7   3  -8  578.13   21.99
   7  -3  -8  562.68   22.22
   7  -3  -8  544.18   22.20
   7  -3  -8  563.51   22.35
  -7   3   8  555.55   22.47
   7  -3  -8  556.37   21.78
  -7   3   8  530.24   21.70
  -7   3   8  540.68   22.53
   7   3  -8  547.83   22.65
   7   3  -8  587.84   22.71
  -7  -3   8  528.22   22.74
 -12  -2   2  450.31   18.80
  12   2  -2  456.09   18.25
  12   2  -2  447.33   18.56
 -12   2   2  441.88   18.62
 -12  -2   2  443.16   18.52
  12  -2  -2  456.99   18.57
 -12  -2   2  439.50   18.17
 -12   2   2  521.73   18.28
 -12  -2   2  468.66   18.02
 -12   2   2  440.54   18.80
  12  -2  -2  456.03   18.86
  12  -2  -2  438.75   18.59
 -12  -2   2  412.13   18.77
  12  -2  -2  471.50   18.87
 -12   2   2  419.13   18.10
 -12   2   2  443.69   18.49
 -12  -2   2  417.31   18.44
  12  -2  -2  435.98   18.56
  12   2  -2  425.35   18.58
 -11   3   3  522.66   20.07
  11  -3  -3  500.55   20.61
 -11  -3   3  501.57   19.76
  11   3  -3  511.67   20.25
  11  -3  -3  517.78   20.56
 -11  -3   3  498.91   20.63
 -11   3   3  471.25   20.02
 -11  -3   3  498.63   20.27
  11  -3  -3  526.83   20.34
  11  -3  -3  527.39   20.50
 -11   3   3  493.09   20.62
 -11  -3   3  481.91   19.67
  11   3  -3  517.15   20.57
 -11  -3   3  523.54   20.48
  11   3  -3  491.75   19.89
 -11   3   3  444.41   19.50
  11  -3  -3  523.56   20.35
  11  -3  -3  496.08   20.46
  -5   1  -7    2.89    4.12
  -5  -1  -7    0.49    3.96
   5  -1   7    1.77    1.70
  -5   1  -7    0.76    3.77
   5   1   7    5.50    3.80
  -5   1  -7    0.24    5.07
  -5  -1  -7    2.90    3.54
   5   1   7    2.35    1.92
   5  -1   7    3.50    5.20
  -5  -1  -7    2.13    2.43
  -5  -1  -7    0.19    3.64
  -5   1  -7    8.50    3.05
   5   1   7    5.80    4.46
   5  -1   7    6.06    3.49
  12   0  -7   -0.74    3.13
  12   0  -7    2.35    3.13
  12   0  -7    3.15    3.69
 -12   0   7    2.66    2.78
 -12   0   7   -1.32    3.60
 -12   0   7    0.93    1.74
   2   2   8  340.13   14.26
  -2  -2  -8  375.51   14.79
  -2   2  -8  361.70   14.75
  -2  -2  -8  348.77   15.24
   2   2   8  325.93   14.99
   2   2   8  376.21   15.19
   2  -2   8  366.15   14.81
   2  -2   8  365.29   14.19
  -2  -2  -8  337.83   14.15
  -2  -2  -8  358.63   14.87
  -2   2  -8  353.95   13.96
  -2   2  -8  325.24   15.66
  -2   2  -8  354.54   14.02
  -2  -2  -8  320.44   13.69
   9   3   2  687.60   27.76
   9   3   2  678.28   27.36
  -9  -3  -2  697.72   27.91
  -9   3  -2  719.14   28.16
   9   3   2  708.84   27.55
   9  -3   2  706.49   27.44
  -9   3  -2  690.94   27.81
   9  -3   2  685.71   27.84
   9  -3   2  718.84   27.43
  -9  -3  -2  673.64   27.42
   9  -3   2  724.31   28.49
  -9  -3  -2  684.14   27.67
  -9  -3  -2  680.83   27.73
   9   3   2  612.63   27.62
   9   3   2  674.43   27.22
  -9   3  -2  736.33   28.02
   9  -3   2  677.63   27.17
  -9   3  -2  720.60   27.55
  -9  -3  -2  671.74   27.88
  -4  -4   7  617.21   23.64
  -4  -4   7  650.05   24.88
  -4   4   7  627.39   24.83
   4  -4  -7  607.51   24.70
  -4   4   7  653.52   25.21
  -4   4   7  581.98   23.56
  -4  -4   7  590.72   25.23
   4  -4  -7  556.20   24.32
   4  -4  -7  617.87   24.29
   4   4  -7  646.18   24.60
   4   4  -7  628.11   24.71
   4   4  -7  558.99   24.88
   4  -4  -7  639.99   24.62
   4   4  -7  637.61   24.20
   9  -1   4    7.01    2.31
  -9  -1  -4    1.12    3.92
  -9   1  -4    3.30    3.70
  -9  -1  -4    8.18    3.71
   9  -1   4    5.39    2.35
   9   1   4    8.11    3.82
  -9  -1  -4    4.91    3.70
  -9   1  -4    3.30    4.95
   9   1   4    2.46    3.20
   9   1   4    5.17    3.50
   9  -1   4    4.90    2.84
  -9   1  -4    1.88    3.34
  -9  -1  -4    3.95    3.07
   9   1   4    4.25    4.56
 -12   2   5 3808.04  132.32
  12   2  -5 3876.36  131.99
  12   2  -5 3589.60  131.45
  12  -2  -5 3842.45  131.65
  12  -2  -5 3789.00  132.23
  12  -2  -5 3918.10  131.94
 -12   2   5 3980.63  131.85
 -12   2   5 3749.12  131.47
  12   2  -5 3773.14  132.26
 -12  -2   5 3928.69  131.91
  12   2  -5 3380.97  132.10
 -12  -2   5 3564.66  131.85
  12  -2  -5 3710.40  132.23
   4   0 -10   66.42    3.86
   4   0 -10   60.33    5.64
   4   0 -10   59.06    4.52
   4   0 -10   64.70    4.30
   4   0 -10   50.28    5.01
   4   0 -10   62.42    4.00
   8  -4   1  399.93   16.48
   8  -4   1  388.40   16.03
  -8   4  -1  392.05   16.31
  -8   4  -1  395.71   16.79
   8  -4   1  416.98   17.23
   8   4   1  390.21   16.43
   8   4   1  389.11   16.05
   8   4   1  367.05   16.05
  -8   4  -1  410.25   16.08
   8  -4   1  389.38   15.95
  -8   4  -1  388.93   16.68
  -8  -4  -1  382.11   16.36
   8  -4   1  392.98   16.31
  -8  -4  -1  379.16   16.13
  -8  -4  -1  376.52   16.72
   8   4   1  375.48   16.24
   8   4   1  386.69   16.21
  -8  -4  -1  386.65   16.14
  11   3  -4  809.93   32.22
  11   3  -4  848.37   31.78
 -11  -3   4  837.82   32.42
  11   3  -4  831.53   32.74
 -11  -3   4  838.52   31.70
  11  -3  -4  783.92   32.18
 -11   3   4  827.58   32.07
  11  -3  -4  868.96   32.70
 -11   3   4  793.53   32.56
 -11  -3   4  803.30   32.79
 -11  -3   4  807.11   31.73
  11  -3  -4  835.00   32.57
  11  -3  -4  813.58   32.63
 -11   3   4  772.80   31.41
 -11   3   4  880.96   32.09
  11  -3  -4  824.47   32.23
  11   3  -4  800.01   32.56
 -11  -3   4  795.02   32.17
  11  -3  -4  828.01   32.52
   5  -5   1   59.15    4.27
   5   5   1   48.51    3.94
  -5   5  -1   60.92    4.95
   5  -5   1   73.96    5.06
   5  -5   1   63.26    5.35
  -5   5  -1   64.46    4.96
   5   5   1   59.77    4.21
   5   5   1   57.19    4.67
   5   5   1   44.99    4.30
  -5   5  -1   57.40    4.02
  -5  -5  -1   54.69    4.40
  -5  -5  -1   59.74    4.71
   5  -5   1   57.61    4.66
  -5   5  -1   58.70    4.54
  -5  -5  -1   64.02    4.80
   5   5   1   51.94    5.17
  -5  -5  -1   58.03    4.67
   5  -5   1   55.65    3.94
  -5   5  -1   24.44    4.53
  -2  -4   7  401.31   16.84
   2  -4  -7  354.91   15.86
  -2   4   7  332.07   14.74
   2   4  -7  406.74   15.79
   2   4  -7  405.34   16.09
  -2  -4   7  395.18   15.06
   2   4  -7  255.78   15.91
   2  -4  -7  390.24   15.72
   2  -4  -7  388.45   15.34
  -2  -4   7  408.66   16.01
  -2   4   7  392.90   15.86
  -2   4   7  383.32   16.52
   2   4  -7  395.53   15.09
   1  -5   4  255.48   10.43
  -1   5  -4  241.92   10.79
  -1   5  -4  226.34   11.22
  -1  -5  -4  240.47   11.13
   1   5   4  247.72   10.17
  -1  -5  -4  234.39   11.11
   1   5   4  241.31    9.82
  -1  -5  -4  241.18   10.64
  -1  -5  -4  231.75   10.99
   1   5   4  234.95   10.39
  -1   5  -4  247.42   10.37
   1  -5   4  238.43   11.41
   1  -5   4  234.07   11.02
  -1   5  -4  243.55   11.17
   1  -5   4  247.97   11.69
   1  -5   4  229.91    9.74
   1   5   4  229.48   10.85
   1  -5   4  253.35   10.46
  11  -3  -2  733.48   29.57
  11  -3  -2  729.07   29.52
 -11   3   2  771.42   29.53
 -11   3   2  805.12   29.86
  11   3  -2  666.52   29.68
  11   3  -2  739.07   29.68
 -11  -3   2  757.72   29.67
  11   3  -2  739.81   29.64
  11   3  -2  748.20   29.51
 -11  -3   2  753.30   29.20
 -11  -3   2  740.32   29.51
 -11  -3   2  724.51   29.72
 -11  -3   2  692.62   29.07
 -11   3   2  734.58   29.31
  11  -3  -2  693.76   29.67
  11  -3  -2  759.53   29.64
  11  -3  -2  739.62   29.71
 -11   3   2  719.76   29.80
 -11   3   2  789.57   29.05
  11   3  -2  757.26   29.22
   6   0 -10 1290.95   51.59
   6   0 -10 1323.78   52.00
   6   0 -10 1319.87   51.61
   6   0 -10 1396.43   51.73
   3  -5   3 3062.84  112.41
  -3  -5  -3 2879.85  112.79
   3   5   3 2923.81  112.43
   3  -5   3 3005.20  112.17
  -3  -5  -3 3006.63  113.10
   3  -5   3 3011.18  112.82
   3   5   3 2687.46  112.01
   3   5   3 2851.77  113.08
  -3  -5  -3 2898.19  112.54
   3  -5   3 3094.95  113.53
   3   5   3 2969.79  112.85
  -3   5  -3 2916.36  112.41
  -3  -5  -3 2980.98  113.05
  -3   5  -3 2911.32  112.85
  -3   5  -3 2977.98  112.78
  -3  -5  -3 2994.88  112.73
   3   5   3 2970.67  112.54
  -3   5  -3 2973.46  113.39
   3  -5   3 2896.86  112.62
   5   5  -4  465.30   20.22
  -5  -5   4  479.21   19.17
   5  -5  -4  468.05   19.97
   5   5  -4  509.81   19.93
   5   5  -4  496.34   19.84
   5  -5  -4  490.11   20.11
  -5  -5   4  540.99   20.28
   5  -5  -4  505.69   20.19
  -5   5   4  441.86   19.07
  -5  -5   4  504.31   19.35
  -5  -5   4  559.77   20.73
  -5   5   4  516.84   20.28
  -5   5   4  476.92   19.64
   5  -5  -4  512.29   20.32
  -5   5   4  477.50   20.03
  11  -1  -8 2831.67  102.59
  11  -1  -8 2683.66  102.36
  11   1  -8 2758.18  102.40
 -11  -1   8 3160.85  102.61
 -11  -1   8 2331.46  102.00
 -11   1   8 2388.39  102.16
  11   1  -8 2606.69  101.80
  11   1  -8 2671.75  102.15
 -11  -1   8 2790.09  102.72
  11   1  -8 2586.31  102.38
  11  -1  -8 2665.28  101.95
  11  -1  -8 2890.41  102.63
  11  -1  -8 2636.73  101.57
   6  -2   6  704.91   29.79
   6  -2   6  765.16   29.08
  -6  -2  -6  704.71   29.11
  -6   2  -6  792.26   29.85
   6   2   6  743.24   29.18
  -6   2  -6  764.69   30.56
  -6  -2  -6  725.64   29.94
  -6  -2  -6  740.48   29.64
   6   2   6  725.60   30.11
   6  -2   6  771.25   29.30
  -6  -2  -6  742.98   29.98
  -6   2  -6  745.68   29.22
  10  -2  -8    6.18    3.30
  10  -2  -8    5.18    2.09
 -10  -2   8    3.54    3.38
 -10  -2   8   -0.15    3.12
  10   2  -8    1.56    1.10
  10   2  -8    8.56    2.48
  10   2  -8    7.44    3.44
  10   2  -8    5.65    2.96
  10   2  -8    4.30    1.26
  10  -2  -8    1.42    3.93
  10  -2  -8    4.18    2.36
  10  -2  -8   11.22    3.51
  10   2  -8    2.05    3.55
  10   2  -8    4.71    1.51
 -10  -2   8    3.04    3.05
 -10   2   8    5.24    2.79
  13  -1  -4  104.11    6.28
 -13   1   4  100.85    4.70
 -13   1   4   95.26    6.23
 -13   1   4  100.21    6.16
 -13  -1   4  106.46    5.24
 -13   1   4   99.01    4.91
  13   1  -4   95.84    6.11
 -13  -1   4   91.16    4.15
  13  -1  -4  106.56    6.23
  13  -1  -4  102.52    5.67
 -13  -1   4   91.35    5.71
  13   1  -4   92.20    5.70
  13  -1  -4   90.23    6.21
 -13  -1   4   96.83    5.91
  13   1  -4   97.24    6.15
  13   1  -4   88.37    5.20
 -13   1   4   99.47    5.57
  -2  -4  -6  334.55   13.10
   2  -4   6  282.13   12.50
  -2  -4  -6  307.34   13.64
  -2   4  -6  324.78   14.26
  -2   4  -6  369.15   13.62
  -2  -4  -6  344.72   13.27
   2  -4   6  337.68   13.69
  -2   4  -6  337.36   12.83
   2  -4   6  230.01   14.74
   2   4   6  295.46   13.04
   2  -4   6  346.35   13.54
  -2   4  -6  334.81   14.35
   2   4   6  333.25   13.75
  -2  -4  -6  350.60   14.31
   2   4   6  348.98   13.54
  -2   4  -6  330.70   14.82
   8   2  -9 3367.63  131.33
   8  -2  -9 3608.44  132.00
   8   2  -9 3742.42  132.00
   8   2  -9 3413.99  132.23
   8  -2  -9 3374.81  131.59
   8  -2  -9 3233.11  131.63
   8   2  -9 3444.82  131.45
  -8   2   9 3581.23  132.24
   8  -2  -9 3710.55  131.69
  -8   2   9 3718.97  131.73
  -8  -2   9 3377.09  132.33
   8   2  -9 3450.68  132.12
   8   2  -9 3222.37  131.07
  10   0  -9   -2.15    3.47
 -10   0   9   -0.82    3.19
  10   0  -9    2.75    3.24
  10   0  -9    6.14    2.84
  10   0  -9    0.98    1.77
  10   0  -9    1.58    2.19
 -13  -1   3    1.16    3.64
 -13  -1   3   -3.36    3.17
 -13  -1   3    0.83    2.26
 -13  -1   3    3.54    3.74
  13  -1  -3    1.58    3.34
 -13   1   3    3.57    3.22
 -13   1   3    4.58    2.43
  13   1  -3    1.01    4.08
  13  -1  -3    0.99    3.95
 -13   1   3   -0.57    3.40
  13   1  -3    0.16    2.90
  13  -1  -3    1.85    3.66
  13   1  -3    0.67    3.03
 -13  -1   3    2.26    2.65
  13   1  -3    0.33    3.67
   5  -1 -10  435.78   19.22
   5  -1 -10  459.47   18.76
   5  -1 -10  452.53   19.13
   5   1 -10  476.00   18.83
   5   1 -10  449.95   19.09
   5  -1 -10  469.64   18.46
   5  -1 -10  421.01   18.13
   5   1 -10  486.22   18.47
   5  -1 -10  466.15   18.77
   5   1 -10  457.12   18.55
   5   1 -10  444.32   18.24
  -1  -1  -9  266.35   12.00
   1  -1   9  269.99   11.71
  -1   1  -9  251.82   11.67
  -1   1  -9  233.75   12.84
  -1   1  -9  247.31   12.36
   1   1   9  263.72   11.74
   1   1   9  267.70   10.81
  -1  -1  -9  269.83   11.89
  -1  -1  -9  267.55   11.49
  -1   1  -9  257.57   10.51
  -1   1  -9  262.29   10.88
  -1  -1  -9  259.80   10.69
  -4  -4  -5   91.58    4.89
   4  -4   5   94.72    4.52
  -4  -4  -5   96.04    5.31
   4  -4   5   88.78    4.46
  -4   4  -5   90.08    4.49
   4  -4   5  109.31    7.24
  -4  -4  -5   89.73    6.11
  -4   4  -5   94.98    6.67
   4   4   5   82.66    4.65
   4  -4   5   97.79    5.57
   4   4   5   93.44    5.30
  -4  -4  -5  101.48    5.59
   4   4   5   98.81    5.90
  -4  -4  -5   92.29    6.40
   4   4   5   81.97    4.10
  -4   4  -5   92.36    5.19
  -4  -4  -5   84.14    5.96
  -4   4  -5   87.88    6.81
   4   4   5  101.44    5.64
   4  -4   5   93.75    5.62
  11  -3  -5   89.53    5.88
  11  -3  -5   80.56    4.81
  11   3  -5   85.47    5.81
  11  -3  -5   77.99    5.71
 -11   3   5   78.93    4.97
 -11  -3   5   77.88    5.75
 -11  -3   5   76.52    4.06
 -11   3   5   75.22    5.29
  11   3  -5   76.90    4.74
  11   3  -5   84.41    5.76
  11  -3  -5   78.30    4.87
 -11   3   5   79.64    4.39
  11  -3  -5   65.00    5.48
 -11  -3   5   84.19    5.00
  11   3  -5   79.85    5.61
 -11  -3   5   95.32    5.42
  11   3  -5   76.31    3.87
  11   3  -5   82.19    4.18
  12  -2  -1 3070.05  119.93
 -12   2   1 3138.01  119.79
  12   2  -1 3095.78  119.96
 -12  -2   1 3034.67  120.24
 -12   2   1 3200.31  120.27
 -12  -2   1 3073.94  119.77
 -12   2   1 3118.09  120.09
  12   2  -1 3028.98  120.02
 -12   2   1 3435.99  120.02
 -12  -2   1 3144.35  119.82
  12  -2  -1 3111.74  120.09
 -12  -2   1 3120.36  120.04
  12   2  -1 3017.56  120.07
  12  -2  -1 3176.70  120.24
  12  -2  -1 3078.52  120.33
 -11   1  -2  359.66   15.48
 -11   1  -2  384.48   16.33
  11   1   2  361.73   15.57
  11  -1   2  337.72   15.59
 -11  -1  -2  359.85   15.54
  11  -1   2  403.22   16.44
  11   1   2  347.90   15.40
  11  -1   2  370.75   15.35
 -11   1  -2  360.45   15.92
 -11   1  -2  370.46   15.74
  11   1   2  352.46   15.56
 -11  -1  -2  344.52   15.37
 -11   1  -2  408.06   15.72
  -6  -4   7  348.94   16.06
   6   4  -7  498.58   17.91
  -6  -4   7  430.79   18.09
   6  -4  -7  446.98   17.35
   6   4  -7  426.37   17.11
  -6   4   7  463.74   17.66
   6  -4  -7  425.33   17.14
  -6   4   7  447.63   16.57
  -6  -4   7  441.38   17.65
   6  -4  -7  415.37   16.74
   6  -4  -7  434.52   17.29
   6   4  -7  444.01   17.46
  -6   4   7  447.56   17.62
   3   5  -5  296.48   11.95
  -3  -5   5  284.13   10.87
   3  -5  -5  250.86   11.53
  -3   5   5  287.90   11.68
  -3  -5   5  275.17   12.13
  -3  -5   5  263.44   10.52
  -3   5   5  299.79   12.07
   3  -5  -5  290.33   11.64
  -3   5   5  301.02   12.41
   3  -5  -5  248.36   11.71
   3   5  -5  285.79   11.49
  -3   5   5  267.90   10.88
  -3   5   5  223.71   10.41
  -3  -5   5  291.63   12.19
   3   5  -5  282.86   11.90
  -8  -4   6  202.79    9.87
   8   4  -6  206.06    8.70
  -8  -4   6  208.41    8.76
   8   4  -6  221.11    9.87
   8  -4  -6  191.88    8.66
  -8   4   6  213.87    9.21
   8  -4  -6  217.23    9.57
  -8  -4   6  198.57    9.21
   8  -4  -6  202.40    9.59
   8   4  -6  210.22   10.04
  -8   4   6  208.19    9.58
   8   4  -6  196.32    8.99
 -13   1   5  518.70   21.13
 -13   1   5  681.62   22.92
  13   1  -5  638.80   21.94
 -13   1   5  618.78   22.29
  13  -1  -5  643.39   22.68
  13  -1  -5  611.93   22.53
  13  -1  -5  661.53   22.42
 -13   1   5  632.87   21.29
 -13  -1   5  624.21   21.79
  13  -1  -5  649.74   22.31
  13   1  -5  620.77   22.45
 -13   1   5  643.66   22.59
 -13  -1   5  636.55   22.42
  13  -1  -5  664.52   22.76
  13   1  -5  630.57   22.38
  11  -3  -1  976.83   38.21
 -11   3   1 1032.10   37.94
 -11   3   1 1032.47   38.31
 -11   3   1  932.42   37.98
 -11  -3   1  975.97   37.92
  11   3  -1  979.45   38.16
  11   3  -1  975.39   38.19
 -11  -3   1  979.46   38.37
 -11   3   1  992.83   38.27
  11   3  -1  972.09   37.98
  11  -3  -1  965.25   38.46
  11  -3  -1  969.81   38.10
 -11  -3   1  911.93   38.15
  11   3  -1  967.07   38.40
 -11   3   1  908.30   38.46
 -11  -3   1  974.66   37.93
  11  -3  -1  965.43   38.05
  11   3  -1  891.87   38.11
  -3   3  -7  172.64    9.35
  -3  -3  -7  151.57    7.09
  -3  -3  -7  190.96    8.91
  -3  -3  -7  197.56    7.47
   3   3   7  190.65    8.37
  -3  -3  -7  197.26    8.47
   3   3   7  199.47    9.00
  -3  -3  -7  183.96    8.27
  -3   3  -7  175.92    9.72
  -3   3  -7  199.31    8.52
   3  -3   7  185.13    8.65
  -3   3  -7  188.66    7.61
  -3   3  -7  201.64    8.12
   3  -3   7  193.21    7.63
   3  -3   7  188.51    8.31
  12   2  -6  132.85    6.24
  12  -2  -6  152.26    7.79
 -12  -2   6  134.41    7.17
  12  -2  -6  163.72    7.09
  12   2  -6  140.86    7.18
  12  -2  -6  131.95    6.51
 -12  -2   6  150.92    7.11
  12  -2  -6  132.00    7.57
  12  -2  -6  145.24    7.61
  12   2  -6  143.56    7.70
 -12   2   6  142.01    6.45
 -12   2   6  137.63    7.32
   2   0 -10 1159.94   47.78
   2   0 -10 1239.12   46.40
   2   0 -10 1220.91   47.05
  -2   0  10 1232.28   47.08
   2   0 -10 1199.42   47.50
   2   0 -10 1171.92   46.68
   2   0 -10 1176.53   46.31
   3  -1 -10   -1.27    2.99
   3  -1 -10    3.68    4.58
   3  -1 -10   -0.35    2.39
   3   1 -10    0.73    2.31
   3   1 -10    2.70    3.10
  -3  -1  10    1.79    2.84
   3  -1 -10    2.42    2.42
   3   1 -10   -5.76    4.59
  -3   1  10    1.97    2.67
   3   1 -10    5.78    4.60
   3   1 -10    2.90    2.16
   3  -1 -10   -3.39    3.75
   3   1 -10    8.76    3.22
  -7  -1  -6  720.48   27.34
   7   1   6  636.95   26.87
   7  -1   6  712.86   26.65
   7   1   6  713.61   28.27
   7  -1   6  690.38   27.79
   7  -1   6  706.57   27.31
  -7   1  -6  706.18   28.55
   7  -1   6  666.78   26.42
  -7  -1  -6  737.89   28.10
   7  -1   6  673.34   26.40
  -7   1  -6  706.75   27.78
  -7   1  -6  675.65   27.65
  -7   1  -6  688.64   27.23
  -7  -1  -6  698.90   27.52
   7  -1   6  709.82   28.53
   1   5  -5 5591.69  199.48
   1  -5  -5 5367.56  199.53
   1  -5  -5 5445.19  199.12
   1   5  -5 5601.91  199.03
   1  -5  -5 5219.80  199.42
  -1  -5   5 5594.08  198.90
   1   5  -5 5640.10  199.45
   1  -5  -5 5618.95  199.39
  -1   5   5 5114.31  198.51
  -1  -5   5 5577.33  199.79
  -1   5   5 5600.52  199.24
  -1  -5   5 4681.07  198.30
  -1   5   5 5803.49  199.60
  -1  -5   5 5260.10  199.46
  -1   5   5 5563.72  199.80
  -1   5   5 5682.76  198.68
  -1  -5   5 4743.25  198.31
  13   1  -2   62.79    5.50
  13   1  -2   71.71    5.02
  13  -1  -2   78.15    5.13
 -13   1   2   74.12    4.39
  13  -1  -2   69.41    5.01
 -13  -1   2   74.64    4.86
 -13  -1   2   68.40    5.37
  13   1  -2   75.32    5.74
  13  -1  -2   78.88    5.87
 -13  -1   2   67.84    5.23
 -13   1   2   71.92    5.08
  13  -1  -2   69.20    5.24
  13   1  -2   73.91    4.88
 -13  -1   2   69.97    5.45
   4   0   8 3180.30  125.65
  -4   0  -8 3441.65  126.38
   4   0   8 3276.53  127.32
  -4   0  -8 3499.01  127.27
  -4   0  -8 3369.56  126.84
   4   0   8 3490.32  127.06
   0  -2  -9 4137.13  148.56
   0   2   9 3967.94  147.85
   0  -2   9 3934.40  147.27
   0  -2  -9 3916.87  147.21
   0   2  -9 3356.85  148.06
   0  -2  -9 3788.89  146.71
   0   2  -9 4051.83  147.50
   0  -2  -9 4224.79  148.07
   0  -2  -9 3975.83  147.60
   0  -2   9 4125.54  147.67
   0  -2  -9 3275.02  146.72
   0   2  -9 4191.78  148.79
   0  -2  -9 3949.77  146.78
   0   2  -9 3954.55  147.20
   0   2   9 3962.01  148.03
   0   2  -9 4054.13  146.88
   0   2   9 3948.77  147.36
   7   1 -10   83.68    5.31
  -7  -1  10   17.29    5.21
   7  -1 -10   75.57    5.03
   7  -1 -10   71.20    4.72
   7   1 -10   61.63    5.12
   7   1 -10   81.86    4.32
   7   1 -10   74.80    4.15
   7   1 -10   75.02    4.46
   7   1 -10   89.31    5.08
   7  -1 -10   79.15    4.51
   7  -1 -10   73.42    5.27
   7  -1 -10   82.00    4.93
   5  -3   6  113.56    5.84
  -5   3  -6  133.36    7.97
   5   3   6  110.70    5.23
   5   3   6  120.29    7.15
  -5  -3  -6  117.12    6.57
  -5   3  -6  140.63    6.95
  -5  -3  -6  121.47    5.52
  -5  -3  -6  108.93    7.44
   5  -3   6  130.20    6.32
   5   3   6  128.90    6.25
  -5   3  -6  120.82    5.82
   5  -3   6  165.51    9.06
   5   3   6  123.70    7.19
  -5   3  -6  120.30    7.45
  -5  -3  -6  127.11    7.41
  -5  -3  -6  130.82    7.03
  -5   3  -6  129.86    6.01
   5  -3   6  129.79    6.76
 -12   0  -1   -1.47    3.69
  12   0   1    0.36    3.73
  12   0   1    5.11    4.23
 -12   0  -1   -1.58    3.34
 -12   0  -1   -1.24    3.92
 -12   0  -1    2.27    3.87
  12   0   1    3.23    3.16
  12   0   1    3.98    4.23
   8   0 -10 1162.19   46.19
   8   0 -10 1248.39   46.19
   8   0 -10 1199.36   46.12
   8   0 -10 1106.20   46.07
   8   0 -10 1200.98   46.00
   8   0 -10 1188.14   46.19
   5   5   2  574.02   24.09
   5  -5   2  549.08   23.17
   5  -5   2  658.36   24.70
   5   5   2  588.62   23.19
   5   5   2  564.08   23.77
  -5  -5  -2  566.73   23.74
  -5   5  -2  587.59   23.36
  -5  -5  -2  576.07   23.91
   5  -5   2  580.86   23.73
   5  -5   2  585.80   23.68
  -5   5  -2  610.71   23.99
   5   5   2  566.61   23.55
  -5  -5  -2  593.36   23.60
   5  -5   2  593.06   23.34
  -5   5  -2  598.27   23.74
  -5   5  -2  590.77   24.21
  -5   5  -2  587.53   23.82
   5   5   2  594.31   23.53
  -5  -5  -2  585.62   23.69
   0   4  -7 1175.82   44.20
   0  -4   7 1140.80   43.96
   0  -4  -7 1065.24   44.70
   0  -4  -7 1100.37   43.65
   0  -4  -7 1167.50   44.22
   0   4   7 1106.14   43.84
   0   4   7 1141.95   44.33
   0  -4  -7 1114.58   43.76
   0   4  -7 1104.85   43.55
   0  -4   7 1175.64   44.34
   0   4  -7 1204.69   44.64
   7  -5  -2   36.08    4.01
  -7   5   2   35.14    3.65
   7   5  -2   35.30    4.07
  -7  -5   2   33.27    3.13
  -7   5   2   30.21    4.35
  -7   5   2   33.71    3.66
   7  -5  -2   36.98    4.20
   7  -5  -2   38.70    4.08
   7   5  -2   31.78    3.93
  -7   5   2   34.63    3.99
  -7   5   2   34.82    3.81
   7   5  -2   38.28    4.12
  -7  -5   2   39.14    3.97
   7   5  -2   34.10    4.35
   7   5  -2   35.90    4.01
  -7  -5   2   37.65    3.89
  -7  -5   2   41.46    4.56
  -7  -5   2   38.01    4.75
   7  -5  -2   31.09    4.17
   2   0   9   -0.55    3.25
   2   0   9   -0.55    1.25
  -2   0  -9    0.16    4.03
  -2   0  -9    1.96    3.10
  -2   0  -9   -0.24    5.28
  -2   0  -9   -0.42    4.25
   1  -3   8   12.57    3.50
   1   3   8    8.17    3.77
  -1  -3  -8    8.30    1.86
  -1  -3  -8    8.10    3.06
   1   3   8   10.05    2.62
  -1  -3  -8    5.33    3.02
  -1   3  -8    4.80    1.26
  -1  -3  -8    6.47    4.28
  -1   3  -8    9.79    3.34
   1  -3   8    9.93    3.12
  -1   3  -8    4.77    0.85
   1   3   8   10.42    3.65
   1  -3   8    1.82    4.95
  -1   3  -8    9.12    2.58
  -6   0  -7   -0.17    4.15
   6   0   7    5.67    3.63
   6   0   7    2.08    1.41
  -6   0  -7    0.14    3.03
  -6   0  -7   -0.98    3.54
  -6   0  -7   -1.50    3.98
   6   0   7    4.82    5.52
 -13   1   6   60.54    5.08
  13  -1  -6   39.01    4.95
 -13  -1   6   38.73    3.53
  13  -1  -6   41.33    4.29
  13   1  -6   48.03    3.51
 -13  -1   6   49.06    4.45
 -13   1   6   49.45    2.61
 -13   1   6   49.97    4.85
  13   1  -6   52.41    4.58
  13  -1  -6   51.16    4.41
  13   1  -6   47.40    4.60
  13  -1  -6   46.02    4.67
  13   1  -6   52.75    4.35
 -13  -1   6   38.22    4.14
  -5  -5   5 2275.68   86.35
   5   5  -5 2226.31   86.34
  -5  -5   5 2318.25   86.80
  -5   5   5 2322.49   85.81
   5  -5  -5 2307.60   86.46
   5  -5  -5 2286.22   86.16
  -5   5   5 2280.29   86.42
   5  -5  -5 2257.63   86.05
   5   5  -5 2426.75   86.49
   5   5  -5 2357.92   86.16
  -5  -5   5 2249.73   86.48
  -5  -5   5 2133.02   85.33
  -5  -5   5 2208.90   85.41
   5   5  -5 2299.60   86.11
  -5  -5   5 2105.30   85.30
   7  -5  -1   98.78    6.36
  -7  -5   1  102.29    5.62
   7   5  -1  105.51    6.25
   7   5  -1  100.04    6.23
   7   5  -1   93.84    5.59
  -7  -5   1  111.83    5.96
  -7  -5   1  103.07    6.50
  -7  -5   1  100.50    6.02
  -7  -5   1  113.38    6.58
   7   5  -1   91.85    5.94
  -7   5   1  111.14    5.97
   7  -5  -1  102.61    6.33
   7  -5  -1  113.44    6.17
  -7   5   1   97.23    5.82
  -7   5   1  104.76    6.47
  -7   5   1   97.31    6.14
  -7   5   1   99.63    5.85
   7  -5  -1  105.32    5.88
   7  -5  -1  114.35    6.46
   7   5  -3   65.09    4.70
   7  -5  -3   61.92    5.07
  -7   5   3   58.05    4.96
  -7   5   3   57.23    4.44
   7   5  -3   63.06    5.07
   7  -5  -3   81.52    5.49
  -7   5   3   53.90    4.86
   7  -5  -3   61.97    4.96
   7  -5  -3   56.10    4.41
  -7  -5   3   56.18    4.36
  -7  -5   3   53.21    5.39
  -7   5   3   61.32    4.36
  -7  -5   3   68.91    5.37
  -7  -5   3   61.06    4.40
  -7   5   3   59.54    3.80
   7   5  -3   61.65    4.80
  -7  -5   3   60.80    3.63
   7  -5  -3   68.66    5.11
   7   5  -3   62.51    5.27
   7   5  -3   66.29    4.60
   8  -4   2 4842.85  186.10
   8   4   2 4769.00  186.25
  -8  -4  -2 4694.83  186.44
  -8  -4  -2 4674.79  186.16
   8   4   2 4523.35  186.17
  -8  -4  -2 4741.32  185.97
  -8  -4  -2 4715.93  186.14
   8   4   2 4770.03  185.84
   8   4   2 4761.72  186.22
  -8  -4  -2 4654.20  186.41
   8   4   2 4740.40  185.91
   8  -4   2 4823.26  185.77
  -8   4  -2 4896.77  186.73
  -8   4  -2 5625.06  186.31
   8  -4   2 5572.67  187.29
  -8   4  -2 4916.97  186.39
   8  -4   2 4945.75  185.94
   8  -4   2 4988.71  186.39
  -8   4  -2 4972.52  186.70
  -8   4  -2 4930.71  185.93
  -8   4  -2 5083.96  186.38
   6  -4   4  571.13   21.62
  -6   4  -4  471.01   20.19
  -6   4  -4  459.18   20.43
  -6   4  -4  491.99   19.60
   6  -4   4  483.17   19.62
  -6  -4  -4  481.04   20.10
  -6  -4  -4  476.52   19.13
  -6  -4  -4  504.83   20.42
   6   4   4  457.61   19.15
  -6  -4  -4  475.01   19.88
  -6   4  -4  471.67   19.13
  -6  -4  -4  496.01   19.35
   6  -4   4  498.09   19.83
   6  -4   4  511.48   19.21
  -6   4  -4  541.31   19.38
   6   4   4  482.43   19.95
   6  -4   4  475.31   18.98
  -6  -4  -4  498.11   19.84
   6   4   4  417.40   18.94
  -6   4  -4  439.95   20.12
   6   4   4  469.05   19.65
   6   4   4  489.34   19.89
  12   0  -812760.30  469.08
  12   0  -812894.60  468.80
  12   0  -812781.00  469.11
 -12   0   813244.10  469.30
  12   0  -813517.00  469.11
 -11   3   6  443.83   17.65
 -11   3   6  451.46   18.10
 -11  -3   6  439.87   17.68
  11   3  -6  435.95   17.65
 -11  -3   6  449.56   18.05
  11   3  -6  447.58   18.34
 -11  -3   6  422.38   17.06
  11   3  -6  404.87   18.31
  11  -3  -6  458.89   17.39
 -11   3   6  432.25   17.19
  11  -3  -6  425.99   17.55
  11   3  -6  430.32   18.31
  11   3  -6  422.50   17.86
  11   3  -6  465.61   17.13
  11   3  -6  401.64   16.76
  11  -3  -6  429.30   18.04
  11  -3  -6  463.80   18.33
  10   4  -3    5.59    3.55
 -10  -4   3    1.63    2.78
  10  -4  -3    3.15    3.49
 -10   4   3   -0.23    2.68
  10  -4  -3   -0.96    3.65
 -10  -4   3   -2.01    3.25
 -10   4   3   -1.33    3.58
  10   4  -3    0.67    3.97
  10   4  -3    3.32    3.28
 -10   4   3   -0.69    3.26
  10   4  -3   -0.16    3.61
  10  -4  -3   -0.99    3.24
 -10  -4   3   -1.60    3.76
  10   4  -3    0.27    3.03
 -10   4   3    1.91    2.33
  10  -4  -3    0.92    3.77
  10  -4  -3    3.31    3.62
  10  -4  -3    4.99    3.91
 -10  -4   3    2.95    2.45
 -10   4   3   -0.35    3.51
 -10  -4   3    1.26    3.59
  10   4  -3    4.52    2.34
  -5   3   9  197.47    8.91
   5  -3  -9  224.73    9.06
  -5  -3   9  195.93    7.77
   5  -3  -9  214.06    8.61
   5   3  -9  208.71    9.47
   5  -3  -9  190.35    9.31
   5   3  -9  207.09    8.99
   5  -3  -9  210.86    9.17
   5   3  -9  209.37    8.88
   5  -3  -9  202.78    7.68
   5  -3  -9  158.85    7.47
   5   3  -9  173.34    9.26
   5   3  -9  196.79    7.69
  10  -4  -2 1076.13   42.79
 -10   4   2 1111.80   42.86
  10  -4  -2 1051.00   42.84
 -10  -4   2 1083.05   42.91
 -10  -4   2 1069.94   42.56
  10   4  -2 1007.37   42.53
 -10   4   2 1128.27   42.23
  10   4  -2 1086.19   42.64
 -10  -4   2 1083.08   42.24
 -10   4   2 1054.02   42.96
 -10  -4   2 1035.84   42.34
 -10  -4   2 1123.60   43.06
  10   4  -2 1092.59   42.86
  10   4  -2 1093.31   42.75
  10  -4  -2 1103.15   42.87
  10   4  -2 1131.05   42.31
  10  -4  -2 1085.62   42.75
 -10   4   2 1098.75   42.55
  10   4  -2 1111.20   42.95
 -10   4   2 1095.85   42.64
  10  -4  -2 1098.84   42.81
  10  -4  -2 1094.18   42.70
 -12   2   0    1.24    3.52
  12  -2   0    5.60    3.34
 -12   2   0    3.81    3.26
 -12  -2   0    8.82    3.85
 -12   2   0    8.79    3.82
 -12  -2   0    6.43    3.67
 -12  -2   0    2.69    3.43
  12   2   0    8.24    4.10
  12   2   0    3.99    3.10
  12   2   0    9.71    3.49
  12   2   0    6.23    3.35
  12  -2   0    4.46    4.71
 -12   2   0    2.09    4.01
  12  -2   0    3.19    3.34
  12  -2   0    8.75    3.92
  12  -2   0    5.91    3.40
 -12  -2   0    5.77    3.86
  10  -2   3  482.05   18.05
  10  -2   3  407.12   18.42
 -10   2  -3  456.91   18.76
  10   2   3  424.75   17.58
  10   2   3  450.10   18.09
  10   2   3  425.63   18.43
  10  -2   3  424.72   17.73
 -10   2  -3  440.89   18.10
 -10   2  -3  442.86   18.59
  10  -2   3  438.84   17.54
 -10  -2  -3  458.48   18.48
 -10   2  -3  458.19   18.92
 -10  -2  -3  436.51   18.07
  10  -2   3  454.70   19.23
  10   2   3  427.11   18.25
 -10  -2  -3  402.12   18.54
  10   2   3  408.87   18.62
  -9   3   8   56.06    4.66
   9  -3  -8   67.25    5.00
  -9   3   8   49.16    4.74
   9  -3  -8   36.19    2.28
   9   3  -8   57.02    3.62
   9   3  -8   54.13    4.71
   9   3  -8   61.05    4.82
   9   3  -8   60.67    5.05
   9   3  -8   57.63    3.38
  -9  -3   8   54.32    4.92
  -9  -3   8   54.07    3.44
  -9   3   8   65.45    3.95
   9  -3  -8   49.42    2.66
   9  -3  -8   61.15    4.27
   9  -3  -8   70.18    5.29
   9  -3  -8   57.17    4.08
 -13   1   1    7.97    3.99
 -13  -1   1    7.20    3.88
  13   1  -1    9.22    4.48
  13  -1  -1   12.02    4.52
  13  -1  -1    7.86    3.40
 -13   1   1   10.68    3.67
 -13  -1   1    6.35    3.46
  13  -1  -1    6.47    3.94
  13   1  -1    5.68    4.00
 -13  -1   1    6.11    3.57
  13  -1  -1    8.14    3.59
  13  -1  -1    2.99    4.16
  13   1  -1    6.96    3.33
 -13  -1   1    1.61    3.60
 -13   1   1    5.42    3.35
   3   3  -9 1785.54   69.12
   3   3  -9 1773.27   69.78
  -3  -3   9 1886.47   69.26
   3  -3  -9 1816.98   69.04
   3  -3  -9 1846.86   70.22
   3   3  -9 1838.11   69.64
  -3   3   9 1897.58   69.84
   3  -3  -9 1819.41   69.19
  -3  -3   9 1652.32   70.67
  -3  -3   9 1956.27   69.83
   3  -3  -9 1918.87   70.07
   3  -3  -9 1876.76   69.62
 -11  -3   0 1435.44   55.69
 -11  -3   0 1481.05   55.94
  11   3   0 1465.25   55.79
  11  -3   0 1414.94   55.59
  11  -3   0 1487.68   55.84
 -11   3   0 1438.04   55.78
  11  -3   0 1459.76   56.33
 -11   3   0 1431.00   56.05
 -11   3   0 1507.03   55.83
 -11   3   0 1436.99   55.82
 -11   3   0 1365.58   56.18
  11  -3   0 1465.35   55.75
  11   3   0 1456.34   56.08
 -11  -3   0 1466.24   56.29
  11   3   0 1431.07   55.73
  11   3   0 1507.31   55.93
 -11  -3   0 1516.94   55.85
 -11  -3   0 1175.81   55.43
  11   3   0 1382.59   55.73
 -10   4   4 3067.76  120.03
  10  -4  -4 3089.98  120.02
 -10  -4   4 3067.94  119.12
  10   4  -4 3109.45  120.18
  10  -4  -4 3215.07  119.55
 -10   4   4 3153.83  119.77
  10   4  -4 3154.90  119.70
  10  -4  -4 3124.06  120.19
 -10   4   4 3152.47  120.19
 -10   4   4 3254.71  119.43
  10  -4  -4 3197.62  120.00
  10   4  -4 3068.51  120.06
  10   4  -4 3129.22  119.60
  10  -4  -4 3136.25  119.64
 -10  -4   4 3174.41  120.19
  10   4  -4 3213.98  120.23
 -10  -4   4 3050.40  119.49
 -10   4   4 3055.62  119.22
 -10  -4   4 3054.44  119.64
 -10  -4   4 3010.85  120.21
   8  -2   5   96.35    6.17
   8  -2   5   99.21    5.12
  -8   2  -5  107.95    7.45
   8   2   5  101.18    5.33
   8   2   5   99.15    6.36
  -8   2  -5   99.01    5.72
  -8   2  -5   94.21    6.35
  -8   2  -5   95.34    6.70
   8   2   5   92.48    6.93
   8  -2   5  100.71    4.50
   8  -2   5   94.78    7.59
   8   2   5  114.24    5.67
  -8  -2  -5   94.42    5.30
  -8  -2  -5   96.23    6.29
   8   2   5   91.21    4.43
  -8  -2  -5   97.11    6.56
   8  -2   5  103.64    5.47
  -8  -2  -5  101.15    6.37
  -8   2  -5   98.70    6.27
   9   3   3 1594.19   65.54
   9  -3   3 1678.71   65.39
   9   3   3 1628.63   65.17
   9   3   3 1697.71   65.94
  -9   3  -3 1705.59   65.98
  -9  -3  -3 1703.13   66.13
  -9   3  -3 1741.03   66.18
  -9  -3  -3 1713.47   65.52
  -9  -3  -3 1737.07   66.10
   9  -3   3 1773.79   66.07
  -9   3  -3 1729.35   66.34
   9  -3   3 1704.57   66.55
   9  -3   3 1769.08   65.50
  -9   3  -3 1754.05   65.52
   9   3   3 1598.64   65.92
  -9  -3  -3 1711.34   65.82
   9  -3   3 1666.91   65.12
   9   3   3 1662.52   65.37
  -3   5  -4  126.82    8.81
  -3   5  -4  184.73    7.95
  -3   5  -4  182.66    9.70
   3  -5   4  181.74    8.77
   3  -5   4  190.95    9.90
   3   5   4  174.10    8.19
  -3  -5  -4  160.44    8.84
   3   5   4  182.42    9.56
   3   5   4  161.44    8.47
   3   5   4  170.14    7.46
  -3  -5  -4  176.65    8.96
   3   5   4  178.66    8.06
  -3  -5  -4  170.74    8.71
  -3  -5  -4  170.06    8.29
  -3  -5  -4  173.97    8.94
   3  -5   4  182.38    8.32
   3  -5   4  178.31    7.49
   3  -5   4  178.72    7.98
  -3   5  -4  188.67    8.38
   1  -5   5  705.20   27.78
   1  -5   5  715.63   27.38
  -1   5  -5  713.98   27.14
   1  -5   5  631.29   26.52
  -1   5  -5  734.54   27.91
   1   5   5  653.03   26.51
  -1   5  -5  756.13   28.12
  -1  -5  -5  720.13   27.91
   1  -5   5  738.58   28.66
  -1  -5  -5  673.58   27.30
  -1  -5  -5  700.22   27.73
   1   5   5  712.06   27.75
  -1  -5  -5  705.04   28.01
   1   5   5  740.71   27.16
  -1   5  -5  708.61   27.60
   1   5   5  696.39   27.31
  12  -2  -7  509.42   20.28
  12  -2  -7  502.91   19.42
  12   2  -7  437.55   20.23
 -12  -2   7  505.81   19.94
 -12   2   7  508.46   20.23
  12  -2  -7  532.07   20.52
  12   2  -7  506.93   20.40
 -12   2   7  503.91   19.52
  12  -2  -7  510.17   19.71
 -12  -2   7  505.01   19.96
  12   2  -7  433.94   19.11
  12   2  -7  502.87   19.81
  12   2  -7  497.71   19.88
 -12  -2   7  462.20   20.47
  -7  -5   0   14.96    3.47
   7   5   0   10.45    3.46
  -7  -5   0   10.06    3.95
   7  -5   0   15.70    4.09
  -7   5   0   11.08    3.31
   7  -5   0   16.77    3.76
   7   5   0   15.70    3.44
  -7  -5   0   17.66    3.88
  -7   5   0   10.57    3.75
   7   5   0   14.88    4.51
  -7  -5   0   16.53    4.20
  -7  -5   0   12.50    3.39
   7  -5   0   15.03    3.27
  -7   5   0   15.45    3.40
   7  -5   0   12.09    4.23
  -7   5   0   15.96    4.44
  -7   5   0    1.40    3.64
   7  -5   0   18.22    4.26
  -7   5   0   14.10    4.00
   7   5   0   13.13    4.07
 -10   0  -4 4374.06  167.95
 -10   0  -4 4385.55  167.99
  10   0   4 4219.56  167.77
  10   0   4 4478.52  167.16
 -10   0  -4 4346.45  167.76
  -7  -5   4  427.81   17.35
  -7  -5   4  440.29   16.89
   7   5  -4  441.52   17.83
  -7   5   4  396.31   17.01
  -7   5   4  409.30   17.53
  -7   5   4  399.43   17.58
  -7   5   4  387.74   16.43
   7   5  -4  433.38   17.52
   7  -5  -4  447.34   17.69
  -7   5   4  424.34   17.28
   7  -5  -4  455.07   17.62
   7  -5  -4  406.91   17.11
  -7  -5   4  403.14   16.43
  -7  -5   4  458.46   17.93
   7   5  -4  423.58   17.23
   7   5  -4  409.28   17.64
  -7  -5   4  420.85   17.95
   7  -5  -4  416.87   17.55
   7   5  -4  420.53   17.77
   1  -1 -10  226.06   13.41
   1   1 -10  280.41   11.48
   1  -1 -10  284.18   11.49
   1  -1 -10  289.05   11.23
   1   1 -10  271.52   11.06
   1   1 -10  303.42   13.48
   1  -1 -10  312.20   12.70
  -1   1  10  298.36   11.74
   1   1 -10  229.25   13.43
  -1  -1  10  282.88   12.24
   1  -1 -10  273.24   11.57
   1  -1 -10  259.21   12.37
   1   1 -10  275.30   12.18
  -1   1  10  275.05   12.48
   1   1 -10  282.01   11.52
   4   2 -10  373.44   15.95
  -4  -2  10  352.13   17.90
  -4  -2  10  426.46   16.48
  -4   2  10  448.90   17.00
   4  -2 -10  423.99   16.73
   4  -2 -10  408.45   16.60
   4  -2 -10  425.60   16.13
   4   2 -10  453.26   16.47
   4   2 -10  430.52   17.14
   4   2 -10  395.46   16.74
   4  -2 -10  423.57   17.30
   4   2 -10  403.81   16.22
   4  -2 -10  394.86   17.35
  10  -4  -1 1286.93   50.30
  10   4  -1 1290.33   50.40
 -10  -4   1 1273.09   50.59
 -10  -4   1 1270.71   50.23
 -10  -4   1 1338.96   50.81
  10  -4  -1 1275.61   50.41
 -10  -4   1 1273.26   50.32
  10   4  -1 1321.34   50.17
 -10   4   1 1262.88   50.69
  10  -4  -1 1495.03   50.82
  10   4  -1 1278.03   50.66
 -10   4   1 1338.27   50.09
 -10   4   1 1242.85   50.37
  10  -4  -1 1235.45   50.64
 -10  -4   1 1283.31   50.08
  10  -4  -1 1343.44   50.76
  10  -4  -1 1304.83   50.41
  10   4  -1 1221.00   50.33
  10   4  -1 1264.89   50.36
 -10   4   1 1329.90   50.43
 -10   4   1 1271.17   50.43
  10  -4  -1 1199.11   50.55
  -7   3  -5  129.96    6.67
   7  -3   5  134.07    7.51
  -7  -3  -5  131.50    7.42
  -7   3  -5  140.91    8.32
  -7  -3  -5  133.33    6.60
   7   3   5  131.19    7.59
  -7   3  -5  143.21    8.23
   7  -3   5  145.88    6.68
  -7   3  -5  136.82    8.50
   7   3   5  145.98    6.55
  -7  -3  -5  134.93    7.99
  -7  -3  -5  137.00    7.90
   7   3   5  142.12    7.92
   7   3   5  138.77    6.95
   7  -3   5  140.41    5.91
  -7   3  -5  132.77    7.40
  -7   3  -5  139.74    6.78
   7  -3   5  139.63    6.78
   7   3   5  138.62    6.03
   6   2 -10   20.09    4.53
   6   2 -10   23.93    2.66
   6  -2 -10   34.85    2.94
   6  -2 -10   28.54    4.35
   6  -2 -10   26.05    4.10
   6  -2 -10   26.54    4.66
   6   2 -10   26.17    4.67
  -6   2  10   34.32    3.72
  -6  -2  10    1.73    4.65
   6   2 -10   25.66    3.63
   6   2 -10   23.19    2.26
   6  -2 -10   27.17    3.19
   6  -2 -10   25.37    3.74
   0  -6   0  243.91   11.02
   0  -6   0  230.54   10.96
   0   6   0  230.10   10.85
   0  -6   0  215.35   11.19
   0   6   0  227.73   11.09
   0   6   0  249.88   11.13
   0   6   0  255.91   10.89
   0  -6   0  256.11   11.26
   8   4  -7  231.84   10.96
  -8   4   7  245.29   11.04
   8  -4  -7  219.62   10.87
  -8  -4   7  235.67   11.02
  -8  -4   7  217.61    9.66
   8   4  -7  246.43   10.99
   8   4  -7  238.77    9.62
  -8   4   7  239.05   10.11
   8   4  -7  234.22   10.10
   8  -4  -7  221.66    9.70
   8  -4  -7  241.30   10.77
  -8   4   7  245.67   10.87
   8  -4  -7  239.00   10.63
   7   3  -9    0.57    1.49
   7  -3  -9    2.70    3.87
   7  -3  -9    1.86    3.26
   7  -3  -9    4.46    2.41
   7   3  -9    1.59    3.06
  -7   3   9    1.63    2.17
   7   3  -9   -2.20    4.32
   7   3  -9    1.21    3.39
   7  -3  -9    3.80    3.47
  -7   3   9    2.40    3.61
   7   3  -9    0.90    4.35
  -7  -3   9   -0.46    4.47
  11   1  -9  875.15   22.14
  11  -1  -9  996.82   23.50
  11  -1  -9  969.19   23.47
  11   1  -9  980.99   23.48
 -11  -1   9  879.82   23.00
  11   1  -9  976.10   22.80
  11  -1  -9  972.09   21.90
  11  -1  -9  955.72   23.23
  11   1  -9  910.33   21.34
 -11   1   9  976.89   23.33
 -11  -1   9  940.24   23.69
  11   1  -9  782.38   21.34
  11  -1  -9  930.62   22.34
   4  -4  -8   -0.44    3.57
   4   4  -8   10.33    4.07
   4   4  -8    5.12    3.31
   4   4  -8    8.05    2.60
  -4   4   8    8.12    3.73
   4  -4  -8    7.32    4.19
  -4  -4   8    4.82    1.79
  -4  -4   8   -0.52    4.61
   4  -4  -8    3.51    3.15
   4  -4  -8    1.21    3.19
  -4   4   8    3.77    5.09
  -4   4   8    3.70    0.91
  -4  -4   8    5.62    4.26
   4   4  -8    5.26    4.38
  10  -4  -5 1852.41   72.80
 -10  -4   5 1630.09   71.48
 -10  -4   5 1916.58   72.22
 -10   4   5 1955.65   72.92
  10   4  -5 1947.13   72.14
  10  -4  -5 1998.37   72.09
 -10  -4   5 1976.63   72.22
  10   4  -5 2018.54   73.01
 -10  -4   5 1731.91   72.77
  10   4  -5 1974.04   72.29
 -10   4   5 1996.06   71.87
  10   4  -5 1879.89   72.66
  10  -4  -5 1912.11   72.54
  10  -4  -5 1942.54   71.97
  10  -4  -5 1947.85   72.78
 -10   4   5 1977.16   72.53
 -10   4   5 1950.43   72.66
  10   4  -5 1764.46   72.63
  10  -4  -5 1964.23   72.71
 -14   0   4 1987.00   79.93
 -14   0   4 2060.29   78.98
 -14   0   4 2075.09   80.11
  14   0  -4 2036.45   80.07
  14   0  -4 2094.23   80.04
  14   0  -4 2050.71   79.79
 -14   0   4 2125.91   79.34
   0  -6   1  884.74   37.56
   0  -6  -1  988.69   38.00
   0   6  -1  917.12   37.51
   0  -6  -1 1005.54   37.89
   0   6  -1  933.78   37.52
   0  -6   1  798.54   37.69
   0  -6   1  942.72   37.83
   0  -6  -1  998.44   37.62
   0   6   1  921.22   37.48
   0  -6  -1  965.63   37.49
   0   6  -1  999.22   37.65
   0  -6   1  982.91   37.41
   0   6   1  963.27   37.55
   0   6   1  936.40   37.67
   0   6  -1  962.18   37.45
   0   6   1  959.91   37.64
   9   1 -10  255.16   10.94
   9   1 -10  230.80   10.99
   9   1 -10  250.72   10.32
   9  -1 -10  256.52   10.85
  -9  -1  10  203.57   11.25
   9   1 -10  250.64   10.79
  -9   1  10  250.70   10.91
   9  -1 -10  244.67   11.07
   9  -1 -10  251.75   10.46
   9   1 -10  251.16   10.46
   9  -1 -10  257.22   11.07
   9  -1 -10  272.12   10.85
   9  -1 -10  201.49   10.32
  -3  -5   6  392.41   18.34
   3  -5  -6  427.37   17.50
  -3  -5   6  443.68   18.12
  -3   5   6  428.69   16.63
  -3  -5   6  414.88   16.78
   3  -5  -6  414.20   17.55
  -3   5   6  426.37   17.87
   3  -5  -6  450.61   17.77
   3   5  -6  449.91   17.86
   3  -5  -6  414.95   17.82
  -3  -5   6  428.28   17.93
   3   5  -6  465.81   17.36
   3   5  -6  459.82   17.83
  -3   5   6  448.62   18.27
  13  -1  -7   19.15    3.37
  13   1  -7   16.79    3.82
 -13   1   7   18.43    4.71
 -13   1   7   20.47    3.85
 -13  -1   7   11.21    3.87
  13   1  -7   16.08    2.57
  13  -1  -7   15.65    3.91
  13  -1  -7   15.15    4.29
  13   1  -7   16.30    3.60
 -13  -1   7   18.42    4.02
 -13  -1   7   17.92    2.86
  13   1  -7   17.29    4.16
 -10   2   9 1883.36   64.86
 -10  -2   9 1661.23   65.18
  10  -2  -9 2002.06   64.69
  10   2  -9 2107.43   64.31
  10  -2  -9 2011.69   65.39
  10  -2  -9 1945.67   65.44
  10   2  -9 2128.66   65.89
  10   2  -9 1784.11   64.79
  10   2  -9 1894.04   64.59
  10   2  -9 1832.63   65.20
  10  -2  -9 2056.83   65.04
  10  -2  -9 1957.80   64.33
  10   2  -9 1791.77   64.02
   0   0 -10 2200.85   81.56
   0   0 -10 2057.79   80.47
   0   0 -10 1998.66   81.82
   0   0 -10 1975.27   82.28
   0   0  10 2123.09   81.65
   0   0 -10 2128.23   80.50
   0   0 -10 2219.52   81.07
  14   0  -3    1.65    4.33
 -14   0   3    2.73    4.13
 -14   0   3    0.38    2.45
 -14   0   3   -1.30    3.33
  14   0  -3    0.49    3.32
   5  -5   3 3117.73  105.64
   5  -5   3 2597.77  103.89
  -5  -5  -3 2614.60  104.71
  -5  -5  -3 2692.08  104.56
  -5  -5  -3 2320.80  104.70
  -5   5  -3 2755.55  104.10
   5   5   3 2802.55  104.99
   5   5   3 2713.47  104.55
   5  -5   3 2897.67  104.54
  -5   5  -3 2611.27  104.59
  -5   5  -3 2713.23  105.09
  -5   5  -3 2800.02  104.68
  -5  -5  -3 2642.14  104.43
   5  -5   3 2717.75  104.40
   5   5   3 2654.75  104.26
   5   5   3 2714.49  104.17
  -5  -5  -3 2626.56  104.19
   5   5   3 2817.87  103.89
  -5   5  -3 2777.36  104.50
   5  -5   3 2778.38  104.00
  -8   0  -622943.00  878.12
   8   0   623637.90  877.35
   8   0   621700.80  878.41
  -8   0  -623603.70  878.72
   8   0   622966.40  877.14
   8   0   622738.90  878.05
  -8   0  -622802.70  877.95
   8   0   623815.50  878.87
   9   1   5 1119.86   43.88
  -9  -1  -5 1218.44   45.49
   9   1   5 1154.35   44.25
  -9   1  -5 1169.38   44.67
  -9  -1  -5 1127.02   44.80
  -9  -1  -5 1142.98   45.06
   9  -1   5 1180.59   44.69
   9   1   5 1152.81   44.87
   9  -1   5 1150.40   45.19
  -9   1  -5 1252.27   45.82
  -9   1  -5 1075.35   44.92
   9  -1   5 1121.45   44.02
   9   1   5 1127.89   45.54
  -9  -1  -5 1085.56   44.64
   9  -1   5 1192.82   44.02
   9   1   5 1024.30   45.05
  -9   1  -5 1134.48   45.01
 -14   0   5    1.54    3.48
 -14   0   5    0.42    3.73
  14   0  -5    1.27    3.57
  14   0  -5   -1.06    4.13
  14   0  -5   -3.89    3.12
 -14   0   5    0.23    0.80
  14   0  -5    0.17    3.49
 -14   0   5    3.57    3.95
 -14   0   5    3.99    2.14
  -2   6   1  194.22    9.10
  -2   6   1  186.56    8.98
   2   6  -1  199.47    9.53
   2   6  -1  181.33    9.17
   2   6  -1  189.57    8.95
   2   6  -1  189.59    9.06
  -2  -6   1  197.77    9.60
  -2  -6   1  172.56    9.24
   2  -6  -1  151.92    9.03
   2  -6  -1  188.17    9.10
  -2   6   1  197.81    9.31
  -2  -6   1  182.92    9.35
  -2  -6   1  194.22    9.10
   2  -6  -1  195.68    9.24
  -2   6   0   35.76    4.14
   2  -6   0   38.07    4.47
  -2   6   0   33.40    3.77
  -2  -6   0   34.89    4.60
   2  -6   0   30.00    4.88
   2   6   0   37.37    4.87
  -2  -6   0   37.75    4.84
  -2   6   0   36.38    4.74
   2   6   0   37.52    4.93
   2   6   0   38.09    4.17
   2   6   0   30.06    3.94
   2  -6   0   22.69    4.33
  -2  -6   0   42.17    4.97
  -2  -6   0   39.43    4.58
   2   4  -8   47.49    5.50
   2   4  -8   45.78    4.09
   2  -4  -8   55.12    4.56
  -2  -4   8   47.19    3.51
   2   4  -8   37.15    3.21
   2  -4  -8   53.82    3.89
   2   4  -8   45.23    5.07
  -2   4   8   48.03    4.40
   2  -4  -8   48.57    2.71
   2  -4  -8   42.81    4.64
  -2  -4   8   49.84    5.68
  -2   4   8   45.01    3.18
  -2  -4   8   51.12    4.90
   1  -3  -9 1346.72   49.67
   1   3  -9 1394.24   50.81
  -1  -3   9 1468.79   49.14
   1  -3  -9 1202.05   48.73
   1   3  -9 1275.61   48.80
  -1   3   9 1352.58   49.19
   1   3  -9 1289.49   49.71
   1  -3  -9 1300.47   48.96
   1  -3  -9 1282.50   48.45
   1   3  -9 1293.13   48.24
   1  -3  -9 1323.46   49.98
   1   3  -9 1291.84   49.58
  -1  -3   9 1344.15   49.15
   1   3  -9 1352.82   49.02
 -11  -3   7  298.88   13.01
  11  -3  -7  303.04   12.95
  11  -3  -7  308.63   13.38
 -11   3   7  341.76   13.55
 -11   3   7  319.10   13.17
  11  -3  -7  318.52   12.61
  11   3  -7  316.81   12.39
 -11  -3   7  295.41   13.58
  11   3  -7  308.34   13.35
  11   3  -7  283.71   12.91
  11   1   3 1191.06   48.82
 -11  -1  -3 1205.47   48.78
 -11   1  -3 1216.23   48.74
  11  -1   3 1242.86   48.76
 -11  -1  -3 1271.04   48.88
 -11   1  -3 1263.61   49.14
  11  -1   3 1247.67   48.28
 -11   1  -3 1222.98   49.36
 -11  -1  -3 1254.22   49.03
  11   1   3 1253.70   49.41
 -11   1  -3 1276.91   48.98
  11   1   3 1258.37   48.89
  11   1   3 1244.76   49.09
 -11   1  -3 1304.07   49.59
  11  -1   3 1260.44   49.58
   1  -5  -6  124.82    6.67
   1  -5  -6  136.19    6.16
   1   5  -6  132.56    5.67
  -1   5   6  126.88    5.27
   1   5  -6  148.95    6.70
  -1  -5   6  138.29    5.82
  -1   5   6   77.78    4.40
  -1   5   6  128.28    6.02
   1  -5  -6  129.77    6.99
   1  -5  -6  140.57    7.18
   1  -5  -6  120.24    6.56
  -1   5   6  136.85    6.58
  -1   5   6  136.12    7.57
   1   5  -6  135.48    7.07
  -1  -5   6  141.67    7.10
   6   4  -8  284.87   12.01
  -6  -4   8  266.18   12.64
   6   4  -8  292.00   12.30
   6  -4  -8  266.07   11.54
   6  -4  -8  282.38   12.22
  -6   4   8  287.24   12.50
   6  -4  -8  266.15   12.17
  -6   4   8  281.04   12.62
  -6   4   8  294.44   11.18
  -6  -4   8  200.38   12.94
   6   4  -8  222.71   12.75
   6  -4  -8  284.28   12.00
  13   1   0    5.26    4.10
 -13   1   0    3.16    3.44
  13  -1   0    4.32    3.82
 -13   1   0    3.44    4.13
 -13   1   0    2.68    3.90
  13   1   0    0.41    4.56
  13  -1   0    7.22    5.20
 -13  -1   0    2.93    3.90
 -13  -1   0    0.97    3.46
  13  -1   0    1.36    4.38
  13   1   0    0.53    3.42
  13  -1   0    1.89    3.29
 -13  -1   0    2.13    3.96
  13  -1   0    3.47    3.57
   2   2 -10 1241.44   45.68
   2   2 -10 1105.20   43.35
   2   2 -10 1044.96   44.85
   2  -2 -10 1172.51   44.64
   2   2 -10 1115.32   43.37
   2  -2 -10 1195.99   43.95
  -2   2  10 1154.19   44.08
   2  -2 -10 1154.22   44.14
   2  -2 -10 1079.15   43.32
  -2  -2  10 1173.57   44.14
   2  -2 -10 1194.08   45.14
   2   2 -10 1175.95   43.95
  -2  -2  10 1283.34   45.95
   2   2 -10 1168.15   44.00
   2  -2 -10 1051.53   43.44
 -12   0  -2  765.57   30.18
 -12   0  -2  752.52   30.42
  12   0   2  772.72   30.43
  12   0   2  741.85   30.41
  12   0   2  750.68   30.83
  12   0   2  752.86   30.23
 -12   0  -2  763.53   30.31
 -12   0  -2  721.01   30.48
   7  -5   1  512.56   21.40
  -7   5  -1  533.62   21.13
   7  -5   1  526.44   21.05
   7   5   1  513.75   20.99
  -7  -5  -1  515.71   21.22
  -7  -5  -1  502.14   21.41
  -7  -5  -1  498.98   21.24
  -7  -5  -1  539.43   21.29
   7   5   1  525.97   21.44
   7   5   1  524.31   21.67
   7   5   1  514.51   21.35
  -7   5  -1  513.24   21.54
  -7   5  -1  535.31   21.48
   7   5   1  543.33   21.29
  -7  -5  -1  473.43   21.75
   7  -5   1  522.03   21.33
  -7   5  -1  526.31   21.66
  -7   5  -1  499.38   21.23
   7  -5   1  506.24   20.98
   7  -5   1  501.34   21.78
   7  -5   1  585.69   22.30
   5  -5  -6  625.34   24.95
  -5   5   6  624.46   25.68
  -5  -5   6  693.83   25.70
  -5  -5   6  591.60   24.13
  -5   5   6  698.22   25.80
   5   5  -6  638.24   25.51
   5   5  -6  692.86   25.34
  -5  -5   6  710.42   25.65
   5  -5  -6  661.72   25.55
  -5  -5   6  658.03   26.10
   5   5  -6  671.69   25.55
   5   5  -6  624.72   25.73
   5  -5  -6  653.08   25.16
  -5  -5   6  543.32   24.09
   5   5  -6  668.28   25.09
  -5   5   6  657.15   24.61
  -4  -2  -8  326.12   14.44
  -4   2  -8  336.81   13.65
   4   2   8  350.88   14.99
   4  -2   8  343.58   13.55
  -4   2  -8  315.22   14.32
  -4   2  -8  319.04   15.25
   4  -2   8  345.23   14.59
   4   2   8  320.85   13.69
  -4  -2  -8  355.16   14.60
   4   2   8  291.51   14.82
  -4  -2  -8  346.35   13.47
  -4   2  -8  324.32   13.41
  10   0 -10  249.89   11.12
  10   0 -10  268.31   10.95
  10   0 -10  255.29   11.75
 -10   0  10  260.38   11.78
  10   0 -10  263.11   11.72
  10   0 -10  274.40   11.65
  10   0 -10  272.84   11.21
   7   5  -5  122.13    6.02
  -7   5   5  116.25    6.50
   7   5  -5  132.41    6.82
  -7  -5   5  125.71    6.88
   7  -5  -5   97.40    5.56
  -7   5   5   80.12    4.13
   7  -5  -5  116.31    6.60
   7   5  -5  122.63    6.17
   7   5  -5  118.71    6.74
  -7  -5   5  121.91    5.31
  -7  -5   5  125.60    6.27
  -7   5   5  127.63    5.81
   7  -5  -5  123.72    6.40
   7  -5  -5  118.29    6.51
 -10  -4   0 1931.72   72.72
  10   4   0 1895.93   72.74
  10   4   0 1839.39   72.60
  10  -4   0 1904.70   72.64
  10  -4   0 1762.75   72.82
 -10   4   0 1897.41   72.64
  10  -4   0 1976.29   73.21
 -10  -4   0 1837.00   72.66
  10   4   0 1898.86   72.58
  10   4   0 1882.59   72.89
 -10  -4   0 1937.33   73.13
  10   4   0 1883.03   72.61
  10   4   0 1863.53   72.72
 -10  -4   0 1795.27   72.47
 -10   4   0 1877.58   72.71
 -10   4   0 1844.35   73.09
  10  -4   0 1888.55   73.11
  10  -4   0 1882.38   72.48
 -10   4   0 1894.66   72.49
  10  -4   0 1903.52   72.65
 -10   4   0 1908.26   72.89
 -10  -4   0 1791.20   72.73
   0   6  -2  533.24   21.16
   0   6   2  543.00   21.30
   0  -6  -2  523.84   21.35
   0   6   2  467.11   20.61
   0   6   2  488.53   21.33
   0  -6   2  514.25   21.80
   0   6  -2  513.04   21.43
   0   6  -2  542.51   21.51
   0  -6   2  531.78   21.71
   0  -6  -2  526.61   21.67
   0  -6   2  499.87   21.15
   0  -6  -2  568.75   21.77
   0  -6  -2  525.43   21.30
  -2  -6   2   23.12    4.62
   2   6  -2   25.57    3.52
   2   6  -2   22.54    4.23
  -2   6   2   23.92    4.53
  -2  -6   2    9.86    4.30
   2  -6  -2   21.82    4.30
   2  -6  -2    3.26    3.77
  -2   6   2   16.82    3.53
  -2   6   2   13.90    3.61
   2   6  -2   17.06    3.96
  -2  -6   2   20.38    4.26
   2  -6  -2   16.30    4.12
   2   6  -2   12.44    4.29
   4  -4   6   23.55    5.97
   4   4   6   32.53    4.24
  -4   4  -6   27.94    2.38
  -4  -4  -6   25.06    4.95
  -4  -4  -6   27.59    4.19
  -4  -4  -6   28.01    4.65
   4  -4   6   24.19    3.82
  -4   4  -6   35.90    2.92
   4   4   6   25.42    2.74
   4   4   6   22.90    3.55
  -4  -4  -6   38.56    3.68
   4   4   6   27.51    4.40
  -4  -4  -6   25.77    2.91
  -4   4  -6   22.36    4.95
  -4   4  -6   24.90    3.33
  -4   4  -6   23.70    5.13
   4  -4   6   34.75    3.97
   4  -4   6   25.87    2.52
  11  -3   1    8.87    3.15
 -11   3  -1    7.24    3.87
  11   3   1    3.89    3.45
  11   3   1    7.47    3.54
  11   3   1    5.99    2.93
 -11  -3  -1    6.51    3.86
 -11  -3  -1    3.73    3.90
 -11  -3  -1   10.14    4.25
 -11  -3  -1   12.80    4.21
  11   3   1   13.68    4.53
  11   3   1   14.12    3.88
 -11   3  -1    5.78    4.36
  11  -3   1    8.65    3.22
 -11   3  -1   10.46    4.01
 -11   3  -1    6.14    4.19
  11  -3   1    7.44    4.99
  11  -3   1   13.11    3.53
 -11  -3  -1   10.04    3.29
   2   4   7  335.84   14.51
   2  -4   7  355.33   14.53
  -2   4  -7  325.66   15.29
  -2   4  -7  342.74   16.15
  -2  -4  -7  380.13   14.22
   2   4   7  365.53   14.47
  -2   4  -7  350.00   13.45
   2  -4   7  313.58   13.19
  -2  -4  -7  333.12   15.16
  -2  -4  -7  357.85   14.42
   2   4   7  308.32   13.73
   2  -4   7  352.73   14.47
  -2   4  -7  349.54   15.19
  -2  -4  -7  351.37   13.78
  -2   4  -7  354.28   14.29
  -2  -6  -1  115.78    7.43
   2   6   1  132.38    6.72
   2   6   1  138.34    7.25
  -2  -6  -1  133.53    7.41
   2   6   1  119.95    7.17
  -2   6  -1  135.04    7.37
  -2  -6  -1  134.74    7.05
  -2  -6  -1  128.78    7.65
   2   6   1  142.03    6.75
   2  -6   1  133.18    7.71
  -2  -6  -1  139.79    7.41
   2  -6   1  131.02    7.23
   2   6   1  126.61    7.56
  -2   6  -1  137.93    6.96
   2  -6   1  127.85    7.84
 -12  -2  -1 2567.33   94.54
  12  -2   1 2451.04   94.46
  12  -2   1 2465.03   95.02
  12  -2   1 2503.79   94.25
 -12   2  -1 2500.23   94.91
 -12  -2  -1 2367.26   94.55
 -12   2  -1 2647.25   94.81
  12   2   1 2511.97   94.88
 -12  -2  -1 2246.65   94.42
  12   2   1 2449.34   94.24
 -12   2  -1 2529.97   94.45
 -12  -2  -1 2451.34   94.58
  12  -2   1 2437.42   94.16
 -12   2  -1 2376.88   94.46
  12   2   1 2512.65   94.66
  12   2   1 2493.43   94.48
 -12   2  -1 2133.37   94.67
  14   0  -2 1053.52   40.66
 -14   0   2  995.53   40.67
  14   0  -2 1052.12   40.75
 -14   0   2  960.08   40.74
  14   0  -2 1046.26   40.41
   8  -2 -10   42.95    4.57
   8  -2 -10   26.90    3.97
   8   2 -10   41.73    4.40
   8   2 -10   30.47    4.40
   8   2 -10   33.57    4.59
   8   2 -10   26.31    2.61
  -8   2  10   31.73    3.49
   8  -2 -10   37.74    4.45
   8  -2 -10   28.27    3.68
  -8   2  10   38.35    4.41
   8   2 -10   38.61    2.61
   8  -2 -10   32.45    3.41
  -8  -2  10   23.34    4.98
   8   2 -10   29.07    3.48
 -14   0   6   22.40    4.37
  14   0  -6   11.83    4.16
  14   0  -6   24.29    3.95
 -14   0   6   19.91    2.14
  14   0  -6   20.33    4.03
 -14   0   6   20.72    4.42
  14   0  -6   25.12    3.54
   8   4   3   69.10    5.04
  -8   4  -3   73.57    4.72
  -8   4  -3   65.56    4.26
  -8   4  -3   70.29    5.85
  -8  -4  -3   68.69    5.74
  -8  -4  -3   76.43    5.57
  -8   4  -3   64.20    4.86
  -8  -4  -3   69.10    5.44
   8  -4   3   75.03    5.07
   8  -4   3   75.32    4.53
  -8  -4  -3   61.89    4.60
  -8  -4  -3   57.27    5.37
   8   4   3   67.43    5.09
   8   4   3   67.45    5.66
   8   4   3   71.50    4.56
   8   4   3   64.37    4.35
   8  -4   3   37.85    6.21
   8  -4   3   73.05    4.31
  -8   4  -3   77.38    5.96
  -8   4  -3   62.66    5.84
   8  -4   3   71.17    5.33
  -5  -1  -8  279.09   11.30
  -5  -1  -8  252.85   12.16
  -5   1  -8  252.59   11.36
  -5  -1  -8  282.02   11.76
  -5   1  -8  289.00   12.15
  -5   1  -8  248.60   12.55
   5  -1   8  243.04   13.32
   5  -1   8  270.44   10.51
  -5  -1  -8  237.61   12.11
   5   1   8  259.89   12.26
   5  -1   8  274.11   12.18
   5   1   8  249.46   10.76
   5   1   8  257.13   12.68
  -3   1  -9 1178.61   46.02
   3   1   9 1210.22   45.68
   3   1   9 1123.96   44.41
  -3   1  -9 1098.19   44.11
  -3   1  -9 1199.89   44.69
   3  -1   9 1187.64   45.50
  -3  -1  -9 1201.18   45.08
  -3  -1  -9 1190.11   45.50
  -3  -1  -9 1169.06   44.70
  -3   1  -9 1155.11   46.27
  -3   1  -9 1147.89   45.32
   3   1   9 1119.99   45.78
  -3  -1  -9 1145.59   45.55
  -2  -2  -9  438.81   17.54
   2  -2   9  454.14   17.66
  -2   2  -9  402.69   16.59
  -2  -2  -9  427.73   17.50
   2   2   9  408.21   16.85
  -2   2  -9  429.82   16.58
  -2  -2  -9  426.85   17.95
  -2   2  -9  378.25   18.58
   2  -2   9  412.92   16.73
  -2   2  -9  428.22   17.48
   2   2   9  382.52   17.67
  -2  -2  -9  407.75   16.75
  -2   2  -9  419.20   18.44
   2   2   9  437.42   17.95
  -2  -2  -9  403.63   16.38
 -12   0   9    1.13    3.57
  12   0  -9    1.47    0.79
  12   0  -9    6.11    3.48
 -12   0   9   -1.22    2.68
  12   0  -9    2.57    3.91
  12   0  -9   -0.92    3.39
  12   0  -9   -0.98    3.72
  12   0  -9    1.83    1.90
 -10   4   6 3510.14  145.10
  10   4  -6 3932.03  145.53
  10  -4  -6 3991.16  146.04
  10   4  -6 4033.87  145.68
  10   4  -6 4111.15  146.22
 -10  -4   6 3923.30  145.66
 -10   4   6 3903.46  146.00
  10  -4  -6 3967.34  146.18
 -10   4   6 4048.98  146.10
 -10  -4   6 3865.71  146.39
  10  -4  -6 3772.85  145.26
 -10  -4   6 3998.61  145.69
  10  -4  -6 3640.49  146.31
  10  -4  -6 3956.14  146.28
  -6  -2  -7 1716.61   67.35
   6  -2   7 1745.13   67.65
  -6   2  -7 1855.21   66.96
  -6  -2  -7 1743.73   67.68
   6   2   7 1722.43   66.85
   6  -2   7 1812.61   66.70
  -6   2  -7 1711.18   68.21
  -6   2  -7 1741.02   67.42
   6  -2   7 1853.34   67.05
   6  -2   7 1528.70   68.26
   6   2   7 1643.23   67.76
  -6  -2  -7 1596.16   66.77
   6   0 -11   -2.97    3.03
   6   0 -11   -3.76    3.55
   6   0 -11   -1.61    4.16
   6   0 -11   -3.79    2.93
  12  -2  -8   95.83    6.48
 -12  -2   8   95.45    5.72
 -12  -2   8   95.57    5.55
  12  -2  -8  101.66    5.12
  12   2  -8   85.75    5.31
  12   2  -8   79.95    4.23
  12   2  -8  105.85    6.30
  12   2  -8   92.67    6.32
  12  -2  -8   99.73    6.37
  12  -2  -8   97.01    4.81
 -12  -2   8  102.87    6.44
  12   2  -8   75.58    6.51
  12   2  -8  106.94    5.44
 -12   2   8   89.21    5.21
  12  -2  -8   95.46    6.27
 -12   2   8   97.85    5.82
   4   0 -11   -4.10    5.14
   4   0 -11   -0.15    3.56
   4   0 -11    3.80    2.61
   4   0 -11    0.87    3.37
   4   0 -11   -3.69    4.08
   4   0 -11   -0.81    2.72
   2   6  -3  303.49   13.34
   2  -6  -3  314.86   13.41
  -2  -6   3  318.61   13.76
  -2   6   3  300.21   13.71
  -2  -6   3  302.74   14.01
   2   6  -3  328.15   13.20
  -2   6   3  310.00   13.28
   2   6  -3  316.68   13.71
   2  -6  -3  279.78   13.30
   2  -6  -3  303.70   13.31
  -2   6   3  253.32   13.29
  -4   6   1  111.26    6.60
  -4  -6   1  114.81    6.22
  -4  -6   1  107.89    6.61
   4  -6  -1  107.51    6.80
  -4   6   1  117.04    6.64
  -4  -6   1  103.70    6.90
   4   6  -1  108.43    6.36
   4   6  -1  119.32    6.66
  -4   6   1  118.41    6.41
   4  -6  -1   94.81    6.65
   4   6  -1  101.58    7.04
  -4  -6   1  101.18    5.96
  -4   6   1  120.93    6.94
   4  -6  -1  123.06    6.58
   4   6  -1  115.94    6.54
  -4   6   1  112.22    6.58
   4   6  -1  108.62    6.72
   4  -6  -1   89.68    6.94
  -6   4  -5   66.19    4.17
   6   4   5   58.93    4.65
   6  -4   5   67.65    3.73
  -6   4  -5   65.36    6.09
  -6   4  -5   72.81    4.69
   6   4   5   62.47    5.18
  -6   4  -5   69.92    6.12
  -6   4  -5   64.21    6.19
   6  -4   5   62.84    4.93
   6  -4   5   73.14    4.20
  -6  -4  -5   68.27    4.33
   6  -4   5   82.20    7.50
  -6   4  -5   64.65    3.86
   6   4   5   63.92    5.38
   6  -4   5   68.09    4.94
  -6  -4  -5   80.85    6.07
  -6  -4  -5   72.44    3.94
   6   4   5   68.61    3.93
  -6  -4  -5   80.65    5.81
  -6  -4  -5   79.91    5.09
   6   4   5   68.29    4.01
  -2  -6  -2    7.15    4.06
   2  -6   2    4.82    4.24
   2   6   2    3.09    3.08
  -2  -6  -2    3.82    4.05
   2  -6   2   -0.17    4.16
   2   6   2    5.66    4.56
  -2   6  -2   -0.30    3.10
  -2  -6  -2    0.16    4.17
   2   6   2    1.43    3.10
  -2   6  -2    5.51    4.29
   2  -6   2    2.59    3.61
  -2   6  -2    8.71    4.11
  -2  -6  -2    6.76    4.22
   2   6   2    1.61    3.17
   2  -6   2   -2.16    4.08
   3  -5   5  570.31   22.71
  -3   5  -5  584.36   22.58
  -3   5  -5  573.98   23.66
   3  -5   5  583.99   22.48
  -3   5  -5  613.66   23.18
  -3  -5  -5  571.78   22.95
   3   5   5  581.05   23.51
   3  -5   5  569.70   21.63
  -3  -5  -5  513.92   22.95
   3  -5   5  544.50   23.97
   3   5   5  562.93   22.16
   3  -5   5  565.17   21.97
  -3  -5  -5  525.46   23.06
  -3   5  -5  518.86   22.98
  -3   5  -5  582.61   22.00
   3   5   5  482.56   21.41
  -3  -5  -5  572.16   22.69
  -3  -5  -5  556.15   22.22
   3   5   5  584.26   22.35
   3   5   5  568.16   22.77
 -13  -1   8  330.06   13.67
 -13  -1   8  283.41   13.96
 -13   1   8  328.88   13.80
  13   1  -8  302.60   12.73
  13  -1  -8  317.23   13.88
  13  -1  -8  282.28   12.21
  13  -1  -8  341.95   13.80
  13  -1  -8  339.34   13.90
  13   1  -8  322.29   13.62
  13  -1  -8  325.08   13.13
  13   1  -8  319.05   13.74
  13   1  -8  313.44   13.37
 -13  -1   8  319.50   12.97
   5  -1 -11  151.76    9.11
   5   1 -11  169.46    8.39
   5   1 -11  172.59    7.71
   5   1 -11  184.91    8.14
   5  -1 -11  157.08    9.10
   5   1 -11  175.35    8.05
   5   1 -11  176.72    9.21
   5  -1 -11  158.66    7.60
   5  -1 -11  169.99    8.57
   5  -1 -11  169.66    8.50
   5  -1 -11  180.59    7.98
   3   3   8  336.19   13.03
  -3   3  -8  340.46   12.75
  -3   3  -8  347.94   13.43
   3  -3   8  353.68   13.46
   3  -3   8  345.96   12.94
  -3  -3  -8  322.61   11.93
  -3  -3  -8  327.40   13.58
   3   3   8  324.21   13.55
  -3   3  -8  264.48   14.35
  -3  -3  -8  328.92   12.92
  -3  -3  -8  321.41   13.16
  -3  -3  -8  250.33   11.73
  -3   3  -8  335.93   12.27
  -4  -6   2  159.28    7.67
   4   6  -2  150.19    8.11
   4   6  -2  150.72    8.86
   4   6  -2  159.52    8.47
   4  -6  -2  150.30    8.69
   4  -6  -2  164.01    8.22
  -4   6   2  157.18    8.10
   4   6  -2  170.51    8.25
  -4   6   2  165.13    8.22
  -4  -6   2  170.00    7.72
   4   6  -2  162.95    8.21
   4  -6  -2  163.64    8.50
  -4   6   2  163.12    7.95
  -4  -6   2  150.85    8.66
  -4   6   2  170.23    8.70
   4  -6  -2  146.27    8.31
  -4  -6   2  166.59    8.45
  -4   6   2  180.63    8.31
  -9   3   9   26.08    2.98
  -9  -3   9   27.35    4.74
   9  -3  -9   20.71    1.36
   9  -3  -9   18.33    1.52
   9   3  -9   30.74    4.74
   9   3  -9   35.98    4.69
   9  -3  -9   23.53    2.25
   9  -3  -9   27.80    4.62
   9  -3  -9   30.12    3.52
  -9   3   9   26.21    4.46
   9   3  -9   32.96    3.25
   9  -3  -9   28.22    3.56
   9   3  -9   29.18    2.70
   9   3  -9   25.80    4.42
   0  -6   3  779.61   29.37
   0   6  -3  762.11   29.73
   0  -6   3  734.85   30.25
   0  -6  -3  769.35   29.58
   0   6   3  690.09   28.87
   0  -6   3  738.71   30.07
   0   6  -3  668.09   29.62
   0   6  -3  753.36   29.40
   0  -6  -3  699.22   29.69
   0  -6   3  770.13   29.87
   0   6   3  769.30   29.55
   0  -4   8  243.51   10.21
   0  -4  -8  221.85   11.26
   0   4   8  225.28   10.53
   0  -4  -8  234.96    9.82
   0   4   8  219.06   10.07
   0  -4  -8  226.68    9.75
   0  -4   8  244.91   10.70
   0   4  -8  222.14   10.92
   0   4  -8  229.03    9.41
   0   4  -8  240.50   10.30
   0  -4  -8  213.61   10.44
  -4   6   0    6.06    3.17
  -4  -6   0    9.59    3.94
   4   6   0   11.65    3.65
   4   6   0    9.00    3.67
  -4   6   0    8.92    4.14
  -4  -6   0    1.35    4.49
  -4  -6   0    4.59    3.70
   4   6   0    7.75    3.69
   4   6   0    3.79    4.24
   4   6   0    8.55    3.61
  -4   6   0    7.38    4.02
  -4  -6   0    9.98    4.12
  -4  -6   0    8.21    3.64
   4  -6   0    7.46    3.91
  -4   6   0    4.24    4.20
   4  -6   0    6.99    3.89
   5   3   7   62.40    5.85
  -5   3  -7   72.34    5.38
   5  -3   7   64.71    3.92
  -5  -3  -7   56.61    5.87
   5  -3   7   61.38    4.97
  -5   3  -7   57.76    6.31
  -5   3  -7   65.09    3.92
   5  -3   7   60.74    4.39
   5   3   7   45.83    2.71
  -5  -3  -7   63.15    5.53
  -5   3  -7   67.11    3.99
  -5  -3  -7   63.33    4.80
   5   3   7   63.45    4.24
  -5  -3  -7   52.85    5.99
  -5  -3  -7   64.91    3.37
   7  -1   7   82.37    5.55
  -7  -1  -7   73.26    5.50
  -7   1  -7   77.30    6.09
  -7   1  -7   74.26    6.26
   7  -1   7   75.70    7.12
   7   1   7   78.86    6.66
  -7  -1  -7   81.08    4.84
  -7   1  -7   82.52    5.42
   7   1   7   82.98    4.05
   7  -1   7   87.94    4.85
  -7   1  -7   91.28    7.68
   7  -1   7   57.09    2.87
  -7  -1  -7   78.30    6.04
   7  -1   7   86.93    3.68
  -7   1  -7   80.37    4.93
  10  -2   4  257.02   10.68
  10  -2   4  221.58   11.18
 -10  -2  -4  232.48   10.55
 -10  -2  -4  229.76   11.09
 -10   2  -4  247.32   11.23
  10  -2   4  237.42   12.30
  10   2   4  231.98   10.66
  10   2   4  229.38   11.62
 -10   2  -4  237.67   10.71
 -10   2  -4  208.84   11.54
 -10  -2  -4  218.39   11.18
  10  -2   4  234.98    9.88
 -10   2  -4  258.64   12.10
  10  -2   4  243.05   10.27
  10   2   4  237.87   11.32
  10   2   4  242.53    9.85
  10   2   4  218.29   10.93
 -10  -2  -4  230.98   11.16
 -10   2  -4  226.87   11.16
  10   2   4  234.48   10.31
 -14   0   1   -6.98    3.81
  14   0  -1   -2.31    4.33
  14   0  -1   -0.21    4.85
 -14   0   1   -0.21    3.76
  14   0  -1   -4.59    3.61
 -14   0   1   -0.78    3.93
  -1  -5  -6  169.19    8.33
  -1   5  -6  170.85    6.78
  -1  -5  -6  143.54    7.98
  -1   5  -6  120.14    8.21
   1   5   6  168.79    7.10
  -1  -5  -6  175.50    7.96
   1   5   6  168.18    7.66
   1  -5   6  104.69    8.67
  -1   5  -6  173.84    7.62
  -1   5  -6  174.67    8.52
   1   5   6  170.25    7.03
  -1  -5  -6  176.47    7.30
   1  -5   6  165.49    7.24
   1  -5   6  114.08    5.68
   1  -5   6  179.20    7.96
   9  -3   4  180.64    9.22
   9   3   4  186.38    8.32
  -9  -3  -4  168.17    9.33
   9  -3   4  192.99    8.45
  -9  -3  -4  180.91    8.36
   9  -3   4  176.26    7.76
  -9   3  -4  178.57    9.80
   9   3   4  189.96    9.31
  -9  -3  -4  179.49    9.09
  -9  -3  -4  180.58    9.56
   9   3   4  178.79    8.46
   9   3   4  184.07    9.57
  -9   3  -4  184.87    9.60
  -9   3  -4  170.66    8.51
   9  -3   4  188.94    8.48
  -9   3  -4  170.13    9.34
   9   3   4  156.01    7.87
   9  -3   4  179.77   10.59
  -9   3  -4  194.93    9.67
  14   0  -7    2.31    3.56
 -14   0   7    0.12    1.75
  14   0  -7    2.07    3.67
 -14   0   7   -2.41    3.86
  14   0  -7    1.05    4.14
  14   0  -7    1.81    3.07
 -14   0   7   -2.45    3.99
  -1  -1 -10   54.90    5.22
  -1   1 -10   54.85    5.49
  -1   1 -10   61.30    5.20
  -1  -1 -10   55.77    4.74
  -1  -1 -10   61.05    5.69
   1   1  10   55.25    5.41
  -1   1 -10   61.56    3.19
  -1   1 -10   64.15    4.20
   1   1  10   54.93    3.61
  -1  -1 -10   60.91    3.56
  -1   1 -10   50.89    6.76
   1  -1  10   54.08    5.01
   8   0 -11   -1.86    3.03
   8   0 -11   -0.96    3.16
   8   0 -11    0.42    3.33
   8   0 -11    3.73    3.44
   8   0 -11   -0.28    3.52
   7   1 -11  118.37    6.62
   7  -1 -11  120.59    6.46
   7   1 -11  108.74    5.90
   7   1 -11  139.44    6.85
   7   1 -11  107.96    5.70
   7  -1 -11   93.48    6.50
   7  -1 -11  123.02    6.97
   7   1 -11  107.33    6.81
   7   1 -11  120.86    6.03
   7  -1 -11  110.26    6.56
   7  -1 -11  118.67    6.07
   7   5   2  607.61   24.90
   7  -5   2  591.23   25.43
  -7   5  -2  627.65   25.70
   7  -5   2  637.23   24.96
  -7   5  -2  624.50   25.42
  -7  -5  -2  603.25   25.20
  -7  -5  -2  627.55   25.66
   7   5   2  650.37   25.98
   7   5   2  639.82   25.16
   7   5   2  632.79   25.54
   7   5   2  613.72   25.38
  -7   5  -2  610.39   25.06
  -7  -5  -2  637.94   25.48
  -7  -5  -2  597.68   25.43
   7  -5   2  734.37   26.61
   7  -5   2  634.04   25.33
  -7   5  -2  651.26   25.93
  -7   5  -2  645.13   25.49
   7  -5   2  604.93   24.92
 -10  -4  -1   18.78    3.88
  10  -4   1   21.06    3.55
 -10  -4  -1   19.61    4.12
 -10   4  -1   20.24    4.14
  10  -4   1   18.08    5.15
  10  -4   1   20.09    3.65
 -10  -4  -1   14.09    4.44
 -10   4  -1   16.25    3.42
 -10  -4  -1   14.56    3.90
  10   4   1   21.37    3.75
 -10  -4  -1   22.42    4.31
 -10   4  -1   15.58    4.46
 -10  -4  -1   17.50    3.92
  10  -4   1   18.04    4.11
  10   4   1   18.38    3.69
  10   4   1   22.16    3.40
  10  -4   1   15.57    5.40
  10   4   1   20.65    3.75
 -10   4  -1   22.28    4.41
 -10   4  -1   21.91    4.70
  10   4   1   16.19    4.40
 -10   4  -1   11.35    4.36
  10  -4   1   13.58    3.96
   8  -4  -8  338.07   14.06
  -8  -4   8  300.62   14.65
   8   4  -8  351.74   13.39
   8  -4  -8  316.47   12.86
   8  -4  -8  315.06   13.65
  -8   4   8  339.52   14.29
  -8  -4   8  304.55   12.62
   8   4  -8  324.48   12.61
  -8   4   8  334.17   14.05
  -8   4   8  338.94   13.13
   8  -4  -8  338.37   13.76
   8   4  -8  312.74   14.11
   7  -5  -6  873.66   35.61
   7   5  -6  882.92   36.21
   7  -5  -6  925.79   35.93
  -7  -5   6  891.15   35.92
  -7  -5   6  871.40   36.50
  -7   5   6  913.48   36.11
   7   5  -6  861.00   35.61
   7   5  -6  926.18   36.14
   7  -5  -6  954.11   36.19
  -7  -5   6  942.37   36.35
  -7   5   6  955.46   35.56
  -7  -5   6  885.99   35.07
   7   5  -6  922.38   35.89
  -9  -5   3   27.83    3.10
  -9  -5   3   25.93    5.08
   9   5  -3   33.90    4.29
  -9   5   3   24.42    3.21
  -9   5   3   26.92    4.12
   9   5  -3   28.56    4.15
  -9  -5   3   27.93    3.80
   9  -5  -3   20.39    3.84
  -9  -5   3   31.65    3.83
   9   5  -3   24.31    4.01
   9  -5  -3   31.25    4.30
  -9   5   3   27.29    3.45
  -9  -5   3   35.18    4.66
   9   5  -3   26.98    4.59
   9  -5  -3   29.91    4.64
   9  -5  -3   31.13    4.21
   9   5  -3   24.29    4.42
  -9   5   3   31.67    4.30
  -9   5   3   28.55    4.41
   9  -5  -2  212.69    9.56
  -9  -5   2  185.20    9.74
   9   5  -2  192.51    9.39
  -9   5   2  186.52    9.53
   9  -5  -2  187.50    9.35
  -9   5   2  209.28    9.44
  -9  -5   2  197.87    9.13
  -9   5   2  205.11    8.78
  -9   5   2  186.15    8.88
  -9  -5   2  194.78    8.60
  -9  -5   2  194.47    9.63
  -9   5   2  191.41    9.44
  -9  -5   2  185.19    9.02
   9   5  -2  193.66    9.44
   9  -5  -2  181.92    9.37
   9   5  -2  185.40    9.44
   9   5  -2  177.07    9.52
   9  -5  -2  196.67    9.64
   9  -5  -2  197.69    9.72
  11   3  -8  579.96   29.24
  11   3  -8  729.42   30.21
  11  -3  -8  755.44   29.26
 -11  -3   8  703.55   30.02
 -11   3   8  774.72   30.17
 -11   3   8  763.84   29.53
  11  -3  -8  750.80   29.95
 -11  -3   8  773.39   29.22
  11  -3  -8  747.77   29.55
  11  -3  -8  701.37   28.67
 -11   3   8  770.74   29.41
  11  -3  -8  798.10   29.98
 -11  -3   8  753.29   29.88
  11   3  -8  770.33   28.65
  11   3  -8  755.55   29.13
   4  -6  -3 1221.44   48.72
  -4   6   3 1234.86   48.55
   4   6  -3 1272.16   48.36
  -4   6   3 1190.21   48.23
  -4  -6   3 1325.63   48.70
   4  -6  -3 1242.43   48.42
   4   6  -3 1171.52   48.27
   4  -6  -3 1214.11   48.35
  -4   6   3 1221.27   48.46
  -4   6   3 1215.23   48.57
   4  -6  -3 1217.19   48.46
  -4  -6   3 1256.64   47.77
   4   6  -3 1255.44   48.35
   4   6  -3 1225.70   48.53
  -4  -6   3 1228.96   47.78
  -4  -6   3 1235.43   48.60
 -13   1  -1   69.40    5.48
  13  -1   1   72.38    5.44
  13   1   1   68.01    5.34
 -13  -1  -1   74.88    5.57
 -13  -1  -1   64.51    5.53
  13   1   1   66.56    5.49
  13  -1   1   75.98    6.30
  13   1   1   73.64    5.76
 -13   1  -1   70.55    5.63
  13  -1   1   71.12    5.41
 -13   1  -1   78.26    6.02
 -13   1  -1   75.11    6.63
  13  -1   1   77.64    6.64
 -13   1  -1   64.15    5.54
  -5  -5  -4   72.30    4.88
   5  -5   4   64.65    4.27
   5   5   4   64.72    3.92
  -5  -5  -4   75.28    5.92
  -5   5  -4   69.97    4.27
  -5  -5  -4   68.23    5.69
  -5  -5  -4   66.97    5.64
   5  -5   4   60.19    5.30
  -5   5  -4   73.99    6.34
   5   5   4   71.11    5.22
  -5   5  -4   70.53    4.95
   5  -5   4   75.95    4.20
   5  -5   4   66.57    5.25
  -5  -5  -4   68.27    5.73
   5   5   4   82.28    5.39
   5   5   4   73.38    4.56
   5  -5   4   64.08    6.84
  -5   5  -4   63.96    5.77
   3   1 -11  686.42   28.60
   3   1 -11  749.80   28.05
   3  -1 -11  731.75   29.05
   3   1 -11  721.98   28.32
   3   1 -11  635.47   29.55
  -3  -1  11  724.59   28.69
   3  -1 -11  728.11   28.23
  -3   1  11  688.46   28.42
   3  -1 -11  648.49   29.56
   3   1 -11  779.06   30.01
   3  -1 -11  728.22   28.97
   3   1 -11  715.07   28.66
   3  -1 -11  738.40   28.31
 -14  -2   4  302.43   12.12
  14  -2  -4  279.45   12.50
  14   2  -4  267.46   12.50
 -14   2   4  294.79   12.13
 -14  -2   4  209.98   11.94
 -14   2   4  269.18   11.08
  14  -2  -4  296.13   12.84
 -14   2   4  288.15   11.55
  14  -2  -4  295.69   12.65
 -14  -2   4  268.80   10.94
  14   2  -4  269.50   12.12
 -14  -2   4  294.15   12.38
  14  -2  -4  281.98   12.40
 -14   2   4  275.92   12.64
  14   2  -4  248.57   12.24
  14   2  -4  263.94   11.77
 -13  -3   4  858.04   22.45
  13  -3  -4  845.71   23.71
  13   3  -4  817.68   23.89
  13   3  -4  795.85   23.60
 -13  -3   4  814.03   24.02
  13  -3  -4  863.79   23.40
  13   3  -4  833.42   22.55
 -13  -3   4  870.14   23.41
 -13   3   4  877.10   23.05
 -13   3   4  833.76   23.86
  13   3  -4  764.24   23.69
  13  -3  -4  851.38   23.60
 -13  -3   4  840.34   22.11
  13   3  -4  796.06   23.18
 -13  -3   4  833.82   23.25
 -13   3   4  825.02   22.75
  13  -3  -4  836.47   23.88
  -4   0  -9    1.06    4.50
   4   0   9    0.48    1.03
  -4   0  -9   -3.14    3.26
  -4   0  -9   -6.20    6.18
   4   0   9    4.19    5.96
   4   0   9   -2.28    4.26
  -4   0  -9    2.31    4.47
  -4   0  -9    2.95    3.11
   3   5  -7  360.94   13.24
  -3  -5   7  346.02   14.10
   3  -5  -7  331.42   13.35
  -3  -5   7  334.38   15.04
  -3  -5   7  333.84   12.65
   3   5  -7  342.45   13.80
   3  -5  -7  353.57   14.26
   3  -5  -7  315.71   13.48
   3  -5  -7  308.58   13.94
  -3   5   7  319.30   14.40
   3   5  -7  323.01   13.75
   3  -5  -7  322.33   13.65
  -3   5   7  266.14   12.05
  -3   5   7  347.79   13.97
   3   5  -7  306.92   14.52
 -13  -3   3 1581.12   61.34
  13   3  -3 1617.73   61.51
 -13  -3   3 1528.67   61.17
  13   3  -3 1551.11   61.79
 -13   3   3 1778.91   62.40
  13   3  -3 1604.86   62.14
  13  -3  -3 1535.89   62.08
  13  -3  -3 1606.17   62.25
 -13   3   3 1623.61   61.73
  13  -3  -3 1519.43   62.00
 -13  -3   3 1575.47   61.83
 -13   3   3 1472.47   62.14
 -13  -3   3 1563.99   62.19
 -13   3   3 1652.97   61.55
  13  -3  -3 1592.36   61.88
 -13  -3   3 1609.49   61.95
  13   3  -3 1458.08   61.86
 -13   3   3 1648.04   61.07
  13  -3  -3 1626.10   61.97
  13  -3  -3 1601.93   61.93
   2   0 -11    0.08    2.20
  -2   0  11    0.86    3.55
   2   0 -11   -1.44    3.99
   2   0 -11    3.82    3.37
   2   0 -11   -4.38    5.66
   2   0 -11    8.48    4.51
   2   0 -11   -0.07    2.13
   0   2 -10   32.50    6.11
   0  -2 -10   41.89    4.25
   0  -2 -10   29.97    5.51
   0  -2 -10   35.31    3.47
   0   2  10   37.33    3.54
   0  -2 -10   25.63    2.33
   0   2 -10   28.52    4.26
   0   2 -10   36.27    2.82
   0  -2 -10   37.32    2.00
   0  -2  10   36.14    4.21
   0  -2 -10   36.69    2.40
   0   2 -10   34.04    3.22
   0  -2 -10   38.84    5.04
   0   2 -10   34.46    5.62
   0   2  10   35.45    4.41
   5  -3 -10 1051.74   43.32
   5  -3 -10 1221.86   44.68
  -5   3  10 1194.92   44.57
   5   3 -10 1106.10   43.47
   5   3 -10 1187.67   44.74
   5   3 -10 1202.12   44.72
   5  -3 -10 1158.86   44.59
   5  -3 -10 1184.03   43.96
   5  -3 -10 1068.88   43.42
   5  -3 -10 1222.03   44.31
   5   3 -10 1171.28   44.36
  -5  -3  10 1195.45   43.60
   5   3 -10 1192.54   44.44
  -4  -6  -1  205.60    9.76
  -4   6  -1  203.73    9.94
   4   6   1  199.43    9.54
   4  -6   1  196.77    9.20
   4   6   1  214.02    9.21
   4  -6   1  202.76    9.46
  -4   6  -1  199.65    9.87
  -4   6  -1  212.91    9.35
   4  -6   1  210.03    9.82
  -4  -6  -1  185.89    9.40
   4   6   1  203.20   10.26
   4  -6   1  202.67   10.11
  -4  -6  -1  180.11    9.51
   4   6   1  187.73    9.38
  -4  -6  -1  202.26    9.81
  -4  -6  -1  182.47   10.12
   1   3   9   38.97    4.62
  -1  -3  -9   34.14    5.38
  -1   3  -9   30.52    2.12
  -1  -3  -9   25.59    5.23
  -1   3  -9   36.35    3.31
  -1  -3  -9   29.43    2.28
  -1   3  -9   20.47    5.62
  -1   3  -9   23.07    5.55
  -1  -3  -9   35.29    3.94
  -1  -3  -9   30.74    3.54
  -1   3  -9   33.88    3.94
   1  -3   9   32.11    3.89
   1   3   9   29.69    4.71
   1  -3   9   45.96    6.80
   1  -3   9   44.75    4.30
   1   3   9   37.88    3.76
  14   2  -3 1402.79   57.58
  14  -2  -3 1430.21   57.63
 -14   2   3 1642.03   56.98
 -14  -2   3 1480.56   56.75
 -14  -2   3 1389.56   57.83
 -14  -2   3 1527.27   57.47
 -14   2   3 1442.45   57.87
  14   2  -3 1428.41   57.57
 -14   2   3 1434.32   57.57
 -14   2   3 1470.88   57.55
  14   2  -3 1425.58   57.70
  14  -2  -3 1454.71   57.83
  14  -2  -3 1461.24   57.67
 -14  -2   3 1341.41   57.67
  14  -2  -3 1514.99   57.73
 -14  -2   3 1518.82   57.55
 -14  -2   3 1520.56   57.14
  14   2  -3 1464.68   57.26
  14  -2  -3 1484.54   57.59
 -14   2   3 1467.04   56.96
  -8   2  -6   13.28    3.58
   8   2   6    8.67    1.16
   8  -2   6   18.25    2.87
   8  -2   6   12.19    4.04
   8   2   6   20.44    5.56
   8   2   6    9.55    4.37
  -8   2  -6   10.40    5.62
  -8  -2  -6   15.72    4.25
  -8   2  -6   10.92    4.02
  -8  -2  -6   12.19    4.79
   8  -2   6   13.29    3.31
   8   2   6   13.45    2.88
  -8   2  -6    6.04    4.57
  -8  -2  -6   14.74    4.31
  -8  -2  -6   12.66    3.02
 -14   2   5  909.76   32.26
  14   2  -5  835.35   32.61
  14  -2  -5  868.39   32.34
 -14  -2   5  914.91   32.16
 -14   2   5  900.90   32.93
  14   2  -5  886.38   32.35
  14   2  -5  797.14   32.44
 -14  -2   5  833.00   32.26
  14  -2  -5  912.61   32.79
  14  -2  -5  910.60   32.59
  14  -2  -5  878.41   32.63
 -14  -2   5  711.07   30.93
  14   2  -5  839.95   31.82
 -14   2   5  886.68   31.63
   9   5  -4  613.35   24.85
  -9  -5   4  610.00   23.59
   9   5  -4  538.54   24.80
   9   5  -4  597.00   24.35
  -9  -5   4  656.91   24.24
   9   5  -4  562.86   24.54
  -9  -5   4  608.16   25.01
  -9   5   4  629.62   24.61
   9   5  -4  598.78   24.94
   9  -5  -4  628.70   24.77
   9  -5  -4  582.96   24.20
  -9  -5   4  533.87   24.87
   9  -5  -4  618.65   24.68
  -9   5   4  616.81   24.03
   9  -5  -4  591.67   24.83
  -9   5   4  632.63   24.69
  -9   5   4  623.30   24.92
   9  -5  -4  602.22   24.75
   9   5  -4  586.18   24.70
  -9  -5   4  585.79   24.36
  -9   5   4  623.59   23.82
  11   1 -10    4.25    3.12
  11  -1 -10    1.18    3.80
 -11  -1  10    4.60    3.94
  11   1 -10    5.10    1.96
  11  -1 -10    3.35    1.84
  11  -1 -10    3.47    2.31
  11   1 -10    4.46    2.82
  11  -1 -10    4.86    3.67
  11   1 -10    4.09    2.46
  11   1 -10    3.63    1.94
 -11   1  10    4.56    3.41
  11  -1 -10    6.48    3.79
 -11  -1  10    1.66    3.80
  11  -1 -10    5.05    2.77
  11   1 -10    6.76    4.11
 -10   0  -5   -0.15    3.92
  10   0   5    0.25    5.60
  10   0   5   -0.33    3.39
 -10   0  -5    6.83    3.77
  10   0   5   -0.93    2.15
   9  -5  -1  141.77    8.26
   9  -5  -1  139.75    7.43
  -9  -5   1  143.56    7.05
  -9  -5   1  126.50    7.88
   9   5  -1  142.63    7.51
  -9  -5   1  132.41    7.58
  -9  -5   1  141.05    7.91
   9   5  -1  151.01    7.61
  -9   5   1  150.81    7.98
  -9   5   1  111.25    7.31
  -9   5   1  152.84    7.69
  -9   5   1  138.17    7.42
   9  -5  -1  134.79    7.99
  -9   5   1  152.35    7.74
   9   5  -1  130.84    7.81
   9  -5  -1  147.49    7.81
   9   5  -1  147.28    7.92
   9  -5  -1  151.61    7.64
  -9  -5   1  129.90    7.20
  10   4  -7 1413.29   53.27
  10  -4  -7 1469.79   53.70
  10   4  -7 1303.96   53.96
 -10   4   7 1410.59   53.68
 -10   4   7 1455.95   53.86
 -10  -4   7 1447.21   54.35
 -10  -4   7 1461.76   53.30
  10   4  -7 1477.94   53.98
  10   4  -7 1413.13   53.21
  10  -4  -7 1462.39   53.81
  10  -4  -7 1481.37   54.00
  11  -3   2  733.36   29.56
  11   3   2  727.08   29.29
 -11  -3  -2  741.30   29.62
 -11   3  -2  731.27   30.19
  11  -3   2  780.48   30.70
  11   3   2  693.36   29.53
 -11   3  -2  764.12   29.98
 -11  -3  -2  747.41   29.85
  11  -3   2  726.24   30.04
  11   3   2  725.74   29.85
 -11   3  -2  771.31   29.67
 -11  -3  -2  711.94   29.81
 -11  -3  -2  735.65   30.18
 -11   3  -2  781.88   30.29
  11   3   2  722.44   29.57
  11  -3   2  766.94   29.50
  11  -3   2  740.89   29.26
 -11  -3  -2  759.43   30.07
  11   3   2  740.09   30.18
  -6   0  -8 1282.25   47.36
  -6   0  -8 1376.96   48.39
   6   0   8 1144.45   46.39
  -6   0  -8 1253.55   47.47
  -6   0  -8 1277.33   47.87
   6   0   8 1178.44   47.94
   6   0   8 1270.66   48.57
  13  -3  -5   99.11    6.41
 -13  -3   5   94.87    5.98
  13   3  -5   81.85    6.25
  13   3  -5   75.26    6.16
  13   3  -5   92.53    5.81
  13   3  -5   96.60    4.88
 -13  -3   5   95.41    4.44
  13  -3  -5   96.02    6.50
  13  -3  -5   82.43    6.40
 -13   3   5   99.63    5.40
 -13  -3   5   84.01    6.42
 -13   3   5  105.31    5.38
  13   3  -5   91.89    6.59
 -13   3   5   97.92    6.30
 -13  -3   5   90.61    6.11
  13  -3  -5   92.42    5.89
  13  -3  -5   87.88    5.84
  -5   5   7   44.30    5.54
   5   5  -7   11.09    5.00
   5  -5  -7   35.50    4.23
  -5   5   7   42.70    2.77
   5  -5  -7   31.94    4.25
   5  -5  -7   49.76    4.82
   5   5  -7   41.46    3.84
  -5  -5   7   31.05    2.06
   5   5  -7   46.23    4.76
   5   5  -7   42.81    4.78
  -5  -5   7   47.59    5.34
   5   5  -7   42.86    5.06
  -5  -5   7   48.94    5.48
   5  -5  -7   37.24    3.90
  -5   5   7   43.85    4.70
   2  -6  -4 1021.80   40.59
   2   6  -4 1051.30   40.33
   2   6  -4 1102.34   40.61
   2  -6  -4 1032.91   40.40
  -2  -6   4 1000.39   40.79
  -2   6   4 1036.38   40.85
  -2   6   4 1054.46   40.48
  -2  -6   4 1015.86   39.60
   2   6  -4 1005.09   40.73
  -2  -6   4 1096.76   40.81
  -2   6   4  960.84   39.57
  -3  -3  10  830.72   32.28
   3  -3 -10  831.32   32.11
   3   3 -10  806.45   32.11
  -3  -3  10  690.56   33.86
  -3   3  10  871.46   32.79
   3  -3 -10  827.33   32.54
   3  -3 -10  854.41   33.45
   3   3 -10  831.33   32.60
   3  -3 -10  819.20   32.07
   3   3 -10  789.48   32.87
   3  -3 -10  817.07   33.05
   3   3 -10  853.14   33.34
  12  -2   2   24.82    5.60
  12  -2   2   14.16    3.52
  12   2   2   13.69    3.20
 -12  -2  -2   13.64    3.70
  12   2   2   20.92    3.77
  12  -2   2   19.26    3.72
 -12  -2  -2   22.67    4.77
 -12  -2  -2   14.17    4.57
 -12   2  -2   14.90    4.26
  12   2   2   23.50    5.23
 -12   2  -2   17.19    4.29
 -12   2  -2   12.51    5.20
  12  -2   2   15.60    3.44
 -12   2  -2   19.79    4.34
 -12   2  -2   10.33    4.68
  12   2   2   13.17    4.13
   7   3   6  156.27    8.55
  -7  -3  -6  161.84    8.69
  -7  -3  -6  137.11    7.19
  -7   3  -6  119.93    9.17
   7  -3   6  165.13    8.26
  -7  -3  -6  156.59    8.22
  -7   3  -6  170.17    7.42
   7  -3   6  159.08    7.33
   7   3   6  168.53    7.60
  -7   3  -6  155.02    9.27
   7  -3   6  162.98    7.46
   7   3   6  144.87    8.53
  -7  -3  -6  147.62    7.97
  -7   3  -6  165.62    7.43
   7   3   6  142.75    6.48
  -7  -3  -6  153.52    8.86
  -7   3  -6  174.21    8.29
  -7   3  -6  166.91    9.00
 -13  -3   2   23.55    4.15
  13  -3  -2   22.38    4.82
 -13   3   2   24.24    4.29
 -13   3   2   23.74    3.38
  13  -3  -2   26.76    4.61
  13  -3  -2   28.94    4.32
  13   3  -2   19.49    4.42
 -13   3   2   25.48    3.85
  13   3  -2   18.61    3.79
 -13  -3   2   26.18    4.74
 -13   3   2   17.82    4.61
 -13   3   2   29.31    4.00
 -13  -3   2   22.40    3.25
 -13  -3   2   26.70    4.21
  13  -3  -2   21.11    4.38
 -13  -3   2   16.28    3.67
  13  -3  -2   16.60    4.13
  13   3  -2   26.27    3.92
  13   3  -2   25.55    4.22
  -2  -6  -3  473.95   21.34
   2   6   3  526.28   20.42
  -2  -6  -3  527.66   21.53
  -2  -6  -3  519.71   21.24
   2   6   3  523.54   21.71
  -2   6  -3  533.50   21.25
   2   6   3  545.36   21.04
   2   6   3  519.87   20.61
   2   6   3  440.27   21.04
   2  -6   3  519.70   21.83
  -2  -6  -3  520.77   21.12
   2  -6   3  498.58   20.79
   2  -6   3  480.86   20.31
  -2   6  -3  475.21   21.27
   2  -6   3  514.21   21.72
  -2   6  -3  519.08   20.84
  -2   6  -3  539.93   21.41
   2  -6   3  549.05   21.42
  10   2 -10   40.51    4.68
  10   2 -10   30.17    4.30
  10   2 -10   34.64    3.25
  10  -2 -10   30.36    4.00
  10  -2 -10   29.92    2.62
  10  -2 -10   33.68    4.58
  10   2 -10   35.66    2.94
  10  -2 -10   38.21    3.46
  10  -2 -10   38.28    4.50
  10   2 -10    7.45    3.96
 -10  -2  10   36.84    4.95
  10  -2 -10   25.51    2.74
 -10   2  10   36.07    3.82
  10   2 -10   28.06    2.29
  -2   0 -10  629.55   25.40
  -2   0 -10  681.72   26.06
   2   0  10  654.96   26.22
  -2   0 -10  582.39   27.05
  -2   0 -10  617.50   26.43
  12   0   3   -4.00    3.57
  12   0   3    1.28    4.32
 -12   0  -3   -0.98    3.58
 -12   0  -3    0.33    4.33
  12   0   3    3.84    4.08
 -12   0  -3    6.70    4.53
   4   4  -9 1412.38   54.28
   4  -4  -9 1229.44   54.28
  -4  -4   9 1433.21   54.44
  -4   4   9 1422.72   54.44
   4   4  -9 1378.01   53.66
   4   4  -9 1435.61   54.28
   4  -4  -9 1369.65   53.79
   4  -4  -9 1363.98   54.50
  -4  -4   9 1469.68   53.43
   4   4  -9 1417.85   54.68
   4  -4  -9 1467.74   54.23
   7  -3 -10    1.58    3.60
   7   3 -10    3.61    3.47
  -7  -3  10    0.27    4.76
  -7   3  10    2.48    2.35
  -7   3  10   -0.77    3.70
   7  -3 -10    0.27    3.49
   7  -3 -10    1.10    1.27
   7   3 -10    3.04    3.66
   7   3 -10    6.00    4.59
   7  -3 -10    4.17    4.32
   7   3 -10    0.18    4.56
   7  -3 -10   -1.46    2.49
   7  -3 -10    2.96    3.71
   7   3 -10    2.65    1.47
   7   3 -10   -0.04    1.20
  -1   5   7  183.25    8.18
   1   5  -7  195.62    8.41
   1   5  -7  197.56    9.56
  -1   5   7  183.34   10.53
  -1   5   7  198.96    9.40
   1  -5  -7  177.00    9.40
   1  -5  -7  175.54    9.67
  -1   5   7  186.82    8.69
   1  -5  -7  171.74    9.62
   1   5  -7  200.41    9.20
  -1  -5   7  182.33    8.43
  -1  -5   7  206.89    9.56
   1  -5  -7  199.97    8.74
   1  -5  -7  185.65    9.23
 -14  -2   2  236.55   10.20
  14  -2  -2  239.43   10.91
 -14   2   2  230.61   10.33
 -14   2   2  269.06   10.61
 -14   2   2  208.97   11.15
 -14   2   2  225.94   10.81
 -14  -2   2  233.28   10.74
 -14  -2   2  238.35   10.92
  14   2  -2  210.20   10.99
  14  -2  -2  229.88   10.97
 -14  -2   2  215.60   11.33
 -14  -2   2  236.10   10.53
  14   2  -2  217.24   10.90
  14  -2  -2  235.19   11.12
 -14   2   2  224.64   10.97
  14   2  -2  232.11   10.60
  14  -2  -2  246.14   11.38
 -14  -2   2  222.76   11.12
  14   2  -2  229.22   11.28
   0  -6   4  240.57   11.63
   0   6  -4  274.82   11.70
   0  -6   4  221.62   11.90
   0   6   4  233.13   10.22
   0   6   4  213.62   11.27
   0  -6   4  243.34   11.55
   0   6   4  238.69   10.93
   0   6  -4  249.73   11.43
   0   6   4  242.88   10.19
   0  -6  -4  221.51   11.37
   0  -6   4  255.14   10.29
   0  -6  -4  263.44   11.61
   0   6  -4  226.41   10.69
   0   6  -4  255.45   11.27
   0  -6  -4  238.37   11.12
   0  -6   4  239.37   10.64
  11   1   4  179.51    9.00
 -11   1  -4  189.21    9.65
 -11   1  -4  176.85    9.04
 -11  -1  -4  163.80    9.37
  11  -1   4  180.89    8.73
 -11  -1  -4  185.04    9.46
 -11  -1  -4  166.22    9.15
 -11   1  -4  175.62   10.25
  11   1   4  177.54   10.07
  11  -1   4  193.87    8.11
  11   1   4  173.75    8.96
  11  -1   4  175.77   10.25
  11   1   4  174.57    9.35
 -11   1  -4  178.13    8.88
  11  -1   4  173.90    8.01
 -11  -1  -4  171.57    8.75
 -14   2   6   31.79    3.67
  14  -2  -6   39.34    4.85
 -14   2   6   33.89    5.44
  14   2  -6   25.85    4.79
 -14   2   6   32.70    4.41
  14  -2  -6   27.01    4.92
  14  -2  -6   30.17    4.36
  14   2  -6   29.83    4.00
 -14  -2   6   34.83    3.99
  14   2  -6   28.24    3.08
 -14  -2   6   27.00    4.32
 -14   2   6   29.01    3.05
  -4   6   4   21.39    2.32
   4   6  -4   25.74    3.87
  -4   6   4   27.09    2.90
  -4   6   4   24.65    4.03
  -4  -6   4   27.50    3.06
   4  -6  -4   28.70    4.33
   4   6  -4   24.45    4.55
   4  -6  -4   26.60    4.47
   4  -6  -4   25.54    4.65
   4   6  -4   19.92    4.12
   4  -6  -4   32.07    4.73
  -4  -6   4   27.26    4.51
  -4   6   4   23.69    4.99
  -4   6   4   21.48    3.42
 -14   0   0    3.44    4.40
 -14   0   0    7.85    4.43
  14   0   0    5.32    4.91
 -14   0   0    7.22    4.26
  14   0   0    6.45    5.10
 -14   0   0    2.13    4.09
  14   0   0    5.56    3.93
  14   0   0    7.94    3.94
  -8   4  -4   64.47    6.07
   8  -4   4   62.17    6.38
   8  -4   4   53.78    5.27
   8  -4   4   56.25    4.20
   8  -4   4   60.87    4.72
  -8   4  -4   67.42    4.53
  -8   4  -4   32.72    5.69
  -8   4  -4   49.48    6.05
  -8   4  -4   61.66    4.48
   8  -4   4   54.36    3.70
   8   4   4   53.12    4.15
   8   4   4   54.43    5.54
   8   4   4   58.74    4.91
  -8  -4  -4   64.95    4.89
  -8  -4  -4   65.45    5.99
  -8  -4  -4   56.23    4.10
   8   4   4   51.92    3.94
  -8  -4  -4   58.31    5.56
  -8  -4  -4   61.89    5.49
   8   4   4   52.67    5.04
   9   1 -11  510.58   20.81
   9   1 -11  509.00   21.09
   9  -1 -11  499.08   20.98
   9  -1 -11  529.05   21.07
   9   1 -11  438.92   21.01
   9  -1 -11  517.73   21.13
   9  -1 -11  562.29   21.35
  -9   1  11  565.74   21.40
   9   1 -11  590.24   20.84
  -9  -1  11  326.70   21.37
   9   1 -11  471.12   21.08
   9  -1 -11  581.18   21.72
   9  -1 -11  601.37   21.26
   9   1 -11  589.98   21.88
  -6   4   9  492.62   20.68
   6   4  -9  479.55   20.69
   6  -4  -9  516.22   20.05
   6  -4  -9  508.48   20.74
   6   4  -9  529.98   20.84
   6   4  -9  493.56   20.45
   6  -4  -9  479.21   20.28
   6  -4  -9  485.94   20.35
  -6   4   9  509.65   19.22
   6   4  -9  507.93   20.12
  12   2  -9  224.35   10.55
  12   2  -9  268.90   11.49
 -12  -2   9  315.91   12.03
  12  -2  -9  244.76   11.16
 -12  -2   9  274.91   12.44
 -12  -2   9  267.77   11.93
 -12   2   9  257.40   11.76
  12  -2  -9  303.27   12.23
  12   2  -9  270.78   10.61
  12   2  -9  271.80   11.51
  12  -2  -9  289.25   12.38
  12  -2  -9  276.30   11.11
  12   2  -9  293.32   12.49
  12   2  -9  292.78   12.71
  12  -2  -9  287.90   12.44
   9  -5  -5 2891.82  100.00
  -9  -5   5 2746.26  100.25
  -9   5   5 2513.70   98.68
   9  -5  -5 2627.40   99.22
   9  -5  -5 2775.36   99.83
   9  -5  -5 2710.54  100.17
  -9   5   5 2832.35  100.14
   9   5  -5 2676.36   99.91
  -9   5   5 2784.52   99.81
   9   5  -5 2767.47  100.10
  -9   5   5 2887.93   99.75
   9   5  -5 2745.46   99.40
   9   5  -5 2752.91   99.89
   9  -5  -5 2770.44   99.89
  -9  -5   5 2776.62   99.22
  -9  -5   5 2776.02  100.15
   9   5  -5 2903.12  100.02
  -9  -5   5 2720.83   99.56
   6   2 -11   28.37    3.00
   6   2 -11   26.23    3.18
   6   2 -11   30.55    4.75
   6  -2 -11   26.58    4.36
   6  -2 -11   21.71    3.49
  -6   2  11   24.78    4.05
   6  -2 -11   42.67    3.23
   6  -2 -11   23.28    4.87
   6   2 -11   32.25    4.04
   6  -2 -11   27.44    4.58
   6   2 -11   26.01    2.54
  -6  -2  11   18.81    5.85
   6  -2 -11   31.88    4.17
   6   2 -11   28.00    4.98
  13  -3  -6 2253.27   85.69
  13  -3  -6 2329.99   86.30
  13   3  -6 2221.78   86.58
 -13  -3   6 2022.23   86.45
 -13   3   6 2351.93   85.63
 -13  -3   6 2042.28   84.96
 -13  -3   6 2191.51   85.84
 -13   3   6 2328.29   86.29
  13   3  -6 2315.40   85.87
 -13  -3   6 2229.13   86.15
  13  -3  -6 2320.36   86.25
  13   3  -6 2122.22   86.19
  13  -3  -6 2285.03   85.68
  13   3  -6 2220.14   86.28
 -13   3   6 2332.18   85.59
  13   3  -6 2291.86   85.19
 -14   0   8 1659.65   65.55
  14   0  -8 1825.06   65.57
  14   0  -8 2026.86   65.23
  14   0  -8 2038.54   65.75
 -14   0   8 2156.05   66.05
  14   0  -8 1776.32   65.56
  14   0  -8 1920.70   65.33
  -9  -5   0   31.82    4.76
   9  -5   0   39.38    5.47
  -9  -5   0   38.50    4.90
  -9   5   0   32.24    4.63
  -9   5   0   36.84    4.18
  -9   5   0   36.47    4.25
   9  -5   0   32.75    4.18
  -9   5   0   43.76    4.88
   9  -5   0   36.55    5.14
   9  -5   0   30.05    4.73
  -9  -5   0   42.26    4.59
   9  -5   0   33.71    3.97
  -9  -5   0   41.34    5.20
  -9  -5   0   32.51    4.19
   9   5   0   36.93    4.09
  -9   5   0   41.21    5.25
   9   5   0   39.38    5.49
   9   5   0   35.73    4.33
   9   5   0   37.20    5.01
   9  -5   0   40.56    4.90
   9   5   0   37.42    4.38
  -4  -6  -2    7.87    4.28
  -4   6  -2    8.24    4.56
   4  -6   2    3.51    4.42
   4   6   2    6.97    3.90
   4   6   2    8.64    5.13
   4   6   2    6.06    3.56
  -4   6  -2    5.54    4.45
   4  -6   2    3.84    4.46
  -4   6  -2   12.17    3.88
  -4   6  -2    4.46    3.17
  -4  -6  -2    9.08    4.24
  -4  -6  -2    0.48    4.30
   4  -6   2    1.49    2.73
  -4  -6  -2    6.68    4.37
   4   6   2    3.28    3.03
   4  -6   2    1.35    3.71
   4   6   2    3.93    3.99
  -4  -6  -2    6.54    4.35
   4   2 -11 8968.83  355.73
   4   2 -1110125.60  354.74
   4   2 -11 8658.86  354.94
  -4   2  11 9771.24  355.40
   4   2 -11 8766.68  355.37
  -4  -2  11 9082.45  355.03
   4  -2 -11 9785.42  354.68
   4  -2 -11 9411.51  355.21
   4  -2 -11 9149.12  355.55
  -4  -2  11 8453.64  356.32
   4   2 -11 8938.97  354.71
   4  -2 -11 9476.62  355.13
   4   2 -11 9463.32  355.21
   4  -2 -11 9338.14  355.89
  -9   1  -6  127.64    8.91
  -9  -1  -6  121.41    7.93
   9   1   6  145.91    8.69
   9   1   6  119.54    5.34
   9  -1   6  136.94    6.04
   9  -1   6  139.75    5.81
   9  -1   6  135.91    7.63
  -9   1  -6  145.03    7.88
  -9  -1  -6  135.65    7.60
   9  -1   6  139.75    7.13
   9   1   6  140.49    6.31
  -9   1  -6  145.08    7.40
  -9  -1  -6  134.57    7.00
   9   1   6  122.21    5.40
   9   1   6  129.07    7.50
  -9   1  -6  142.72    7.65
 -12   0  10  154.09    7.82
  12   0 -10  149.85    7.71
  12   0 -10  133.80    7.25
  12   0 -10  138.68    7.63
  12   0 -10  142.10    7.07
  12   0 -10  102.96    5.82
  12   0 -10  145.10    5.64
   6  -6  -2  568.11   23.64
   6  -6  -2  567.18   24.03
   6  -6  -2  614.37   24.09
  -6   6   2  597.04   23.44
  -6   6   2  583.83   23.97
  -6  -6   2  581.74   23.81
   6   6  -2  566.37   23.70
   6   6  -2  576.06   23.63
   6   6  -2  578.64   23.85
  -6  -6   2  566.15   24.01
  -6   6   2  578.32   23.83
  -6  -6   2  584.89   23.25
   6   6  -2  564.77   23.61
  -6   6   2  582.62   23.50
   6   6  -2  578.84   23.83
  -6   6   2  583.42   23.89
   6  -6  -2  572.55   23.75
  -6   6   2  579.44   23.66
  -6  -6   2  571.35   23.11
   2   4  -9  429.10   16.85
   2   4  -9  393.21   15.97
   2  -4  -9  405.73   17.38
   2  -4  -9  408.14   16.75
   2  -4  -9  415.29   16.24
   2  -4  -9  391.93   15.83
  -2  -4   9  440.51   16.37
  -2   4   9  437.06   17.06
  -2  -4   9  438.66   17.12
   2   4  -9  421.98   17.11
  -2  -4   9  292.17   17.73
   2  -4  -9  407.52   17.50
   2   4  -9  248.97   16.93
  13   1  -9  545.14   22.35
  13   1  -9  565.16   22.95
 -13  -1   9  595.83   23.75
  13   1  -9  612.20   23.29
 -13  -1   9  460.63   22.59
  13   1  -9  628.69   22.48
 -13   1   9  519.60   23.01
  13  -1  -9  606.88   23.47
  13  -1  -9  540.44   21.94
  13  -1  -9  597.64   23.48
  13  -1  -9  615.41   23.52
 -13  -1   9  634.56   23.49
  13  -1  -9  560.52   22.63
  13   1  -9  590.56   23.42
  15  -1  -4   -2.16    4.21
  15   1  -4    3.31    4.13
 -15  -1   4    2.73    1.82
  15  -1  -4    0.89    3.76
 -15  -1   4    3.87    4.14
 -15   1   4    4.35    4.20
 -15   1   4    3.84    2.55
  15  -1  -4    6.88    4.53
 -15   1   4    2.97    3.22
 -15  -1   4    3.94    1.79
  15   1  -4    2.39    3.34
 -15  -1   4    6.01    3.21
 -15   1   4    0.91    3.68
  15   1  -4    2.82    4.13
 -15  -1   4    2.11    3.77
  12  -4  -3 1531.75   57.48
  12   4  -3 1512.83   56.79
 -12  -4   3 1400.05   56.70
 -12  -4   3 1500.59   57.49
  12  -4  -3 1495.82   57.31
 -12   4   3 1413.25   57.56
 -12  -4   3 1495.54   57.19
  12  -4  -3 1474.60   57.32
 -12  -4   3 1471.29   57.67
 -12   4   3 1339.19   56.57
 -12   4   3 1472.09   57.05
  12  -4  -3 1463.94   57.50
  12  -4  -3 1481.93   57.34
  12   4  -3 1419.46   57.37
  12   4  -3 1455.63   57.52
  12   4  -3 1494.70   57.21
 -12  -4   3 1500.46   56.68
 -12   4   3 1523.89   57.56
 -12   4   3 1523.21   57.11
  -6  -6   1  170.93    8.97
  -6  -6   1  183.03    9.13
   6   6  -1  158.13    8.88
   6  -6  -1  181.06    8.91
  -6   6   1  176.82    8.82
   6   6  -1  173.05    8.93
   6   6  -1  179.22    9.00
   6   6  -1  170.56    8.61
   6  -6  -1  178.77    9.37
   6  -6  -1  179.64    8.75
  -6   6   1  188.58    8.77
  -6  -6   1  175.00    8.62
   6  -6  -1  176.11    9.15
   6   6  -1  172.89    9.00
  -6   6   1  186.37    8.76
  -6   6   1  176.48    9.01
  -6  -6   1  164.46    8.28
  12   4  -4 1300.87   51.94
  12  -4  -4 1366.52   51.72
 -12   4   4 1278.44   51.29
 -12   4   4 1304.44   51.86
  12  -4  -4 1273.78   51.53
 -12  -4   4 1317.72   51.00
  12  -4  -4 1323.46   51.88
 -12  -4   4 1204.94   51.86
 -12  -4   4 1306.14   51.39
 -12  -4   4 1296.54   50.76
  12   4  -4 1362.06   51.46
 -12   4   4 1312.20   50.64
  12   4  -4 1282.22   51.75
  12   4  -4 1355.28   50.87
  12  -4  -4 1355.14   51.47
 -12   4   4 1366.70   51.15
 -12  -4   4 1389.56   51.84
 -12   4   4 1266.31   51.73
  13  -3  -1  267.11   12.38
 -13  -3   1  242.12   12.18
  13  -3  -1  290.14   12.50
 -13   3   1  263.93   12.29
 -13   3   1  271.69   12.60
  13  -3  -1  287.51   13.04
  13  -3  -1  267.90   12.40
  13   3  -1  287.33   12.32
 -13   3   1  293.90   12.24
  13   3  -1  276.95   12.57
  13   3  -1  280.73   12.60
 -13  -3   1  288.47   12.32
 -13  -3   1  289.13   12.68
 -13  -3   1  283.46   12.79
 -13   3   1  280.93   12.91
  13  -3  -1  258.15   12.66
  13   3  -1  268.10   12.36
 -13  -3   1  277.48   12.09
 -13   3   1  294.11   12.67
  15   1  -5   22.15    4.82
 -15  -1   5   26.07    3.26
  15   1  -5   16.49    4.14
  15  -1  -5   15.95    4.33
  15   1  -5   19.18    3.63
  15  -1  -5   20.71    4.22
 -15   1   5   23.48    2.05
 -15  -1   5   26.23    4.56
  15  -1  -5   22.65    4.04
  15  -1  -5   25.25    4.53
 -15   1   5   25.80    2.52
 -15   1   5   19.09    2.54
  15  -1  -5   18.20    4.88
 -15   1   5   22.59    4.04
 -15   1   5   19.04    4.56
 -10   0  11   -0.55    3.67
  10   0 -11    1.70    3.88
  10   0 -11    2.15    2.76
  10   0 -11   -0.30    3.33
  10   0 -11    2.65    3.06
  10   0 -11    1.07    3.73
  10   0 -11   -0.11    3.08
 -10   4  -2 2967.57  111.98
 -10  -4  -2 2882.90  111.42
  10  -4   2 2904.79  112.22
 -10   4  -2 2915.08  111.66
 -10  -4  -2 2905.09  111.49
  10   4   2 2755.70  111.36
  10  -4   2 2906.63  110.98
  10   4   2 2899.62  111.12
  10   4   2 2852.98  111.56
  10  -4   2 2921.12  111.30
  10   4   2 2989.09  111.75
 -10  -4  -2 2912.18  111.74
 -10   4  -2 2885.53  111.26
  10  -4   2 2933.89  111.24
  10  -4   2 2872.46  111.65
 -10  -4  -2 2978.28  111.36
  10   4   2 2894.09  111.15
 -10   4  -2 2541.25  111.79
 -10  -4  -2 2982.22  111.90
 -10   4  -2 2931.76  111.60
   4  -4   7   34.68    4.44
  -4  -4  -7   30.14    4.21
   4  -4   7   39.50    6.99
  -4   4  -7   36.64    3.75
  -4   4  -7   37.34    5.94
  -4  -4  -7   41.63    4.13
   4   4   7   28.49    2.69
  -4   4  -7   29.29    2.16
   4  -4   7   32.29    4.25
   4   4   7   27.84    3.90
   4   4   7   37.59    4.99
  -4  -4  -7   30.22    5.42
  -4   4  -7   31.81    5.89
  -4   4  -7   34.65    2.76
   4  -4   7   39.90    2.79
  -4  -4  -7   33.77    5.48
   4   4   7   28.61    4.74
  -4  -4  -7   32.01    3.07
  -7   5  -3 1539.30   60.35
  -7   5  -3 1572.41   59.79
   7  -5   3 1538.02   59.26
   7  -5   3 1536.48   59.65
  -7   5  -3 1531.01   59.96
   7   5   3 1473.09   59.33
  -7  -5  -3 1486.98   60.04
   7  -5   3 1730.76   61.11
   7  -5   3 1531.08   59.16
  -7  -5  -3 1518.52   59.81
   7   5   3 1499.05   59.79
  -7   5  -3 1593.31   59.98
   7   5   3 1460.30   59.68
  -7   5  -3 1567.87   59.37
  -7  -5  -3 1503.20   59.74
  -7  -5  -3 1531.40   59.49
   7  -5   3 1589.43   59.92
   7   5   3 1491.64   59.13
   1   1 -11  149.51    8.10
   1  -1 -11  158.41    8.63
   1   1 -11  164.15    7.08
   1  -1 -11  155.93    8.32
   1   1 -11  119.11    9.54
  -1   1  11  148.78    7.03
   1  -1 -11  151.63    6.82
   1  -1 -11  156.50    7.09
   1  -1 -11  132.79    9.49
  -1  -1  11  160.99    8.09
   1  -1 -11  153.74    6.40
   1   1 -11  138.00    6.74
   1   1 -11  136.74    9.05
   1   1 -11  147.81    6.22
  -1   1  11  148.79    8.23
   8   0   7    1.12    4.18
   8   0   7   -1.30    3.60
   8   0   7   -1.27    1.91
  -8   0  -7    3.17    3.66
   8   0   7   -0.78    6.07
  -8   0  -7   -0.14    3.88
  -8   0  -7    2.19    4.66
 -15  -1   3    3.51    4.03
 -15  -1   3    7.67    4.36
  15  -1  -3   15.75    4.19
 -15   1   3   14.85    4.01
 -15  -1   3    6.56    2.75
  15  -1  -3    5.14    4.81
  15   1  -3    5.06    5.02
 -15  -1   3    5.24    4.44
 -15  -1   3    3.66    3.19
 -15   1   3    4.77    2.92
 -15   1   3    3.02    3.67
  15  -1  -3    4.05    3.79
  15   1  -3    9.65    4.02
  15   1  -3    2.95    3.69
   6   6  -3   -0.63    4.06
  -6  -6   3    3.47    3.40
  -6   6   3    1.15    3.50
  -6  -6   3   -0.24    4.74
  -6   6   3    8.42    3.03
   6   6  -3    8.90    4.19
   6   6  -3    4.96    3.78
  -6  -6   3    5.48    2.91
  -6  -6   3    1.63    4.23
   6   6  -3    4.72    4.34
   6  -6  -3    0.85    3.89
  -6   6   3    3.92    3.80
  -6   6   3    4.34    4.58
   6  -6  -3    1.48    4.04
   6  -6  -3    6.39    4.17
  -6   6   3   -0.15    3.92
  -6   6   3    3.35    3.57
   7  -5  -7   -2.58    4.13
   7   5  -7    2.02    3.71
   7  -5  -7    1.87    4.12
   7   5  -7    3.37    3.27
  -7  -5   7    2.61    4.02
  -7  -5   7    1.11    1.89
   7  -5  -7    0.59    3.00
  -7   5   7    1.73    4.92
  -7  -5   7   -3.99    4.83
   7   5  -7    0.38    4.47
   7   5  -7   -1.59    3.63
  -7   5   7    4.94    2.75
  -7   5   7   -0.21    4.11
  12   4  -2  292.03   12.22
 -12   4   2  295.63   12.73
 -12   4   2  256.60   12.85
  12   4  -2  275.01   12.79
  12   4  -2  285.37   12.74
 -12  -4   2  286.43   12.19
  12  -4  -2  288.25   13.27
 -12  -4   2  280.34   12.19
 -12  -4   2  285.98   13.00
 -12  -4   2  284.45   12.97
  12  -4  -2  284.56   12.62
  12  -4  -2  280.43   12.77
 -12  -4   2  288.14   12.70
 -12   4   2  267.68   12.48
 -12   4   2  283.48   11.95
  12   4  -2  285.54   12.75
  12  -4  -2  289.57   12.75
   2   4   8 1654.72   64.63
  -2  -4  -8 1619.30   63.94
  -2   4  -8 1738.39   64.55
  -2   4  -8 1502.61   65.82
   2  -4   8 1674.18   64.58
  -2  -4  -8 1691.88   64.53
  -2  -4  -8 1741.41   64.45
  -2   4  -8 1635.70   63.66
   2   4   8 1710.17   64.71
   2  -4   8 1718.93   64.69
  -2   4  -8 1644.75   65.09
  14   2  -1   81.41    5.87
 -14  -2   1   72.05    5.89
  14  -2  -1   72.19    5.48
  14  -2  -1   82.27    5.71
  14  -2  -1   82.60    6.92
 -14  -2   1   75.76    5.75
 -14   2   1   90.88    5.79
 -14   2   1   84.00    5.99
 -14  -2   1   70.84    5.20
 -14   2   1   83.22    5.48
 -14   2   1   72.86    5.73
  14   2  -1   79.29    6.08
  14   2  -1   82.44    5.64
  14  -2  -1   80.38    5.69
 -14  -2   1   63.70    6.04
  12   4  -5  144.54    7.25
 -12  -4   5  138.41    6.71
 -12  -4   5  121.58    8.04
  12   4  -5  140.91    6.18
 -12  -4   5  139.61    7.33
  12  -4  -5  136.46    8.06
  12  -4  -5  132.25    7.35
  12  -4  -5  145.59    7.23
  12   4  -5  138.35    7.95
 -12   4   5  136.91    7.80
 -12   4   5  139.56    7.94
 -12   4   5  138.22    7.42
 -12  -4   5  139.95    8.04
  12   4  -5  133.16    8.07
 -12   4   5  149.03    6.68
  12   4  -5  141.79    6.89
  12  -4  -5  133.90    7.84
 -12  -4   5  144.12    6.13
   1   3 -10 1240.63   46.73
  -1  -3  10 1295.48   46.90
   1   3 -10 1313.53   48.59
   1   3 -10 1045.08   47.40
   1   3 -10 1111.75   45.87
  -1  -3  10 1270.49   46.87
   1  -3 -10 1297.07   48.03
   1  -3 -10 1259.27   47.54
   1  -3 -10 1192.96   46.68
   1   3 -10 1222.43   46.61
   1   3 -10 1217.30   45.88
  -1   3  10 1227.26   46.89
   1  -3 -10 1280.02   46.68
   1  -3 -10 1246.75   46.16
   6  -6   0    4.78    3.86
   6  -6   0   -4.90    4.32
  -6   6   0   -0.38    4.04
   6   6   0   -1.09    3.53
  -6  -6   0   -1.94    4.32
   6   6   0   -1.58    3.54
  -6  -6   0   -0.71    3.53
  -6  -6   0    2.68    4.09
  -6   6   0    0.34    3.45
   6   6   0    0.94    4.81
  -6  -6   0    4.94    4.16
   6  -6   0    2.67    3.35
   6  -6   0    1.35    4.27
   6   6   0    2.07    3.95
  -6   6   0    4.04    3.99
  14   2  -7  189.75    9.84
  14  -2  -7  202.01    9.88
 -14   2   7  191.15    8.39
  14  -2  -7  204.69    9.22
 -14   2   7  190.23    9.77
 -14  -2   7  207.02    9.12
  14  -2  -7  182.08    8.51
 -14  -2   7  191.03    9.42
  14  -2  -7  214.77   10.14
  14   2  -7  182.59    8.37
  14   2  -7  202.52    9.35
  -3   5  -6   23.34    3.62
   3  -5   6   21.64    2.13
  -3   5  -6   15.10    2.66
   3   5   6   17.33    3.03
   3   5   6   28.74    4.01
  -3  -5  -6   13.95    4.13
   3  -5   6   15.95    4.38
   3   5   6   13.60    3.81
   3  -5   6   12.73    6.14
  -3  -5  -6   23.48    3.44
  -3  -5  -6   23.35    3.42
  -3  -5  -6   22.52    5.18
   3  -5   6   19.37    3.98
  -3  -5  -6    7.13    4.79
  -3   5  -6   23.35    5.17
  -3   5  -6   24.07    5.75
   8  -2 -11  423.00   16.84
   8  -2 -11  414.55   16.21
   8   2 -11  408.42   15.82
   8   2 -11  349.59   15.75
   8  -2 -11  424.72   16.67
   8   2 -11  413.73   17.09
  -8  -2  11  351.33   17.57
   8  -2 -11  357.94   16.67
   8  -2 -11  399.95   16.81
   8   2 -11  402.18   17.02
   8   2 -11  463.45   17.19
   8  -2 -11  380.51   16.22
 -15   1   6   -3.50    3.74
  15   1  -6    1.92    3.96
 -15  -1   6    1.21    4.14
 -15  -1   6    5.18    4.12
  15  -1  -6   -1.68    3.75
  15   1  -6    3.12    3.19
 -15   1   6    4.22    4.47
  15   1  -6    5.05    4.09
 -15   1   6   -0.33    1.58
  15  -1  -6    1.18    4.80
  15  -1  -6    6.35    4.21
  15  -1  -6    4.80    4.09
 -15  -1   6    3.78    2.83
  -2  -6   5   70.61    6.28
  -2  -6   5   64.72    3.73
  -2   6   5   70.44    5.13
   2  -6  -5   85.84    5.65
   2   6  -5   73.37    5.59
   2  -6  -5   71.11    5.87
   2   6  -5   72.78    5.85
  -2   6   5   68.38    5.73
   2  -6  -5   75.91    5.58
  -2  -6   5   81.37    4.57
  -2   6   5   75.87    4.30
   2   6  -5   79.38    5.03
  -2   6   5   77.87    4.00
  13   1   2   78.84    5.89
  13  -1   2   79.59    5.11
 -13  -1  -2   76.02    5.98
 -13   1  -2   76.97    5.87
  13  -1   2   83.50    5.94
  13  -1   2   79.46    5.75
  13   1   2   62.94    6.03
 -13  -1  -2   66.90    5.32
 -13   1  -2   74.78    5.92
 -13   1  -2   69.74    6.35
 -13   1  -2   78.08    7.13
  13   1   2   79.88    5.85
  13  -1   2   79.26    5.27
  11   3  -9    8.50    4.01
 -11   3   9   14.32    3.62
  11   3  -9   21.06    3.14
  11   3  -9   18.52    4.63
 -11  -3   9   15.78    4.70
  11   3  -9   20.89    2.40
  11  -3  -9   13.21    2.03
 -11  -3   9   16.98    3.36
  11  -3  -9   16.06    3.47
  11  -3  -9   20.48    4.14
 -11   3   9   16.78    4.24
  11  -3  -9   14.45    4.40
 -11   3   9   16.24    4.22
   0   0 -11    2.10    4.34
   0   0 -11    0.57    1.49
   0   0 -11   -7.28    1.93
   0   0  11    2.76    4.00
   0   0 -11    0.69    4.55
   0   0 -11   -1.65    6.52
   0   0 -11    4.78    3.51
  -6   4  -6   33.22    6.24
  -6   4  -6   67.47    6.39
  -6  -4  -6   59.75    4.09
   6  -4   6   66.83    5.12
   6   4   6   58.01    3.67
   6  -4   6   65.78    4.04
   6  -4   6   65.75    5.48
  -6   4  -6   62.04    4.04
   6   4   6   70.69    5.56
   6   4   6   61.48    3.75
  -6  -4  -6   69.50    5.09
   6   4   6   63.62    4.72
   6   4   6   55.03    5.40
   6  -4   6   27.83    6.84
  -6  -4  -6   72.02    6.55
   6  -4   6   73.56    3.35
  -6  -4  -6   63.45    3.65
  -6   4  -6   65.44    4.59
  -6  -4  -6   57.16    6.04
  -2   6  -4 1612.24   60.76
   2  -6   4 1613.25   60.86
   2   6   4 1701.93   60.23
  -2  -6  -4 1598.63   60.84
   2  -6   4 1650.68   61.70
   2   6   4 1492.26   59.78
   2  -6   4 1626.75   60.49
  -2  -6  -4 1496.56   60.97
   2  -6   4 1625.44   60.32
   2  -6   4 1689.39   61.45
   2   6   4 1553.98   60.46
  -2   6  -4 1615.07   60.36
   2  -6   4 1547.89   59.81
   2   6   4 1632.37   60.93
  -2  -6  -4 1570.57   60.47
  -2  -6  -4 1539.58   61.04
 -10   4   8  900.53   35.99
 -10   4   8  913.42   36.36
  10  -4  -8  950.18   35.91
  10   4  -8  852.78   35.15
 -10   4   8  938.35   35.72
  10   4  -8  912.84   35.24
  10  -4  -8  906.84   35.65
 -10  -4   8  864.54   36.52
  10  -4  -8  925.45   36.05
  10   4  -8  906.11   36.41
  10   4  -8  937.32   36.01
 -10  -4   8  927.02   35.24
  10  -4  -8  878.76   34.88
   9   3 -10  328.74   19.51
   9  -3 -10  583.77   19.75
   9  -3 -10  542.31   19.34
   9   3 -10  574.09   20.16
   9  -3 -10  408.37   17.92
  -9   3  10  594.08   19.06
   9   3 -10  572.59   20.18
   9  -3 -10  546.01   18.96
   9   3 -10  618.59   19.07
  -9  -3  10  251.95   19.31
  -9   3  10  610.54   20.34
   9  -3 -10  502.67   18.97
   9  -3 -10  401.18   18.01
   9   3 -10  518.26   18.45
  -9   5   6 1185.71   47.87
   9  -5  -6 1223.15   47.95
   9  -5  -6 1349.37   48.74
   9   5  -6 1250.58   48.04
   9   5  -6 1163.00   47.35
  -9  -5   6 1208.28   47.61
  -9  -5   6 1219.69   47.15
   9  -5  -6 1215.20   47.88
  -9  -5   6 1215.34   48.34
   9  -5  -6 1193.26   47.17
  -9   5   6 1243.98   47.62
   4  -2   9   62.45    4.09
  -4   2  -9   75.96    4.51
  -4  -2  -9   68.28    5.41
   4  -2   9   67.22    5.65
   4   2   9   74.26    5.82
  -4  -2  -9   69.38    4.00
  -4   2  -9   66.17    6.69
  -4  -2  -9   76.98    5.72
   4   2   9   68.43    4.39
   4   2   9   70.07    6.47
  -4   2  -9   70.83    3.87
  -4   2  -9   64.84    5.58
 -13  -3   7   13.07    3.88
  13  -3  -7   12.95    3.29
  13  -3  -7   11.39    4.68
  13   3  -7   13.74    3.63
  13   3  -7    9.00    4.45
  13  -3  -7   13.26    3.35
  13   3  -7    8.90    1.71
 -13   3   7   10.62    3.76
 -13  -3   7    8.78    3.90
 -13   3   7    9.71    3.57
   4   6  -5   13.24    4.37
  -4  -6   5   13.90    4.61
   4  -6  -5   14.93    4.27
  -4   6   5    8.02    1.93
  -4   6   5    6.33    3.84
  -4   6   5    7.95    1.57
   4  -6  -5   11.39    4.31
   4   6  -5   12.45    3.63
   4  -6  -5   13.01    3.78
  -4  -6   5   17.71    2.48
  -4   6   5   11.47    2.94
  -8   4   9   17.72    2.81
   8  -4  -9   22.37    2.92
  -8   4   9   14.80    5.08
   8  -4  -9   25.93    4.02
  -8   4   9   26.11    4.49
   8   4  -9   26.58    3.89
   8  -4  -9   20.32    4.39
   8   4  -9   26.90    5.31
   8   4  -9   17.96    4.14
   8  -4  -9   18.12    4.26
  -8  -4   9   12.36    4.58
   8   4  -9   15.39    1.91
   8  -4  -9   18.40    3.17
  -2  -2  11  576.85   23.04
   2  -2 -11  579.66   22.65
   2   2 -11  548.69   22.09
   2   2 -11  601.44   22.05
   2   2 -11  523.55   23.99
   2  -2 -11  580.96   23.60
   2   2 -11  590.09   22.68
   2   2 -11  563.93   24.50
   2  -2 -11  579.39   23.08
   2  -2 -11  539.82   24.05
   2  -2 -11  554.90   22.11
   2   2 -11  596.85   22.94
  -2   2  11  569.33   22.87
   2  -2 -11  528.03   22.01
   1   5   7  322.66   13.89
   1  -5   7  325.33   14.55
  -1  -5  -7  324.66   14.46
  -1  -5  -7  336.63   13.82
   1   5   7  306.58   13.77
  -1   5  -7  332.84   13.51
   1  -5   7  334.89   14.08
  -1   5  -7  348.88   14.89
   1   5   7  331.76   14.53
  -1   5  -7  352.30   14.34
 -15  -1   2    4.25    4.12
 -15   1   2   -0.11    3.42
 -15  -1   2    2.11    4.08
 -15   1   2    4.90    4.04
  15  -1  -2    3.84    4.22
  15  -1  -2   -0.19    3.76
  15   1  -2    1.15    3.94
  15   1  -2    3.20    3.60
  15  -1  -2    5.79    3.99
 -15  -1   2    5.12    4.23
  15  -1  -2    7.25    5.15
  -9  -5  -1 3894.07  147.56
   9  -5   1 3783.63  147.24
  -9  -5  -1 3745.44  147.50
  -9  -5  -1 3759.55  147.51
   9   5   1 3890.81  147.70
   9   5   1 3679.68  147.69
  -9   5  -1 3914.39  147.53
   9   5   1 3859.65  147.34
  -9   5  -1 3853.38  148.13
  -9  -5  -1 3819.47  147.75
   9   5   1 3940.34  147.60
  -9  -5  -1 3877.83  148.22
  -9   5  -1 3870.24  147.69
   9   5   1 3693.30  147.42
  -9  -5  -1 3807.90  147.43
  -9   5  -1 3941.28  147.99
   9  -5   1 4228.50  148.54
   9  -5   1 3633.68  147.71
   9  -5   1 4001.94  147.64
   9  -5   1 3734.82  147.32
  -9   5  -1 3998.61  147.54
  -6  -6   4  541.59   20.58
   6   6  -4  491.85   20.22
   6   6  -4  460.43   20.63
  -6   6   4  520.48   20.56
  -6   6   4  498.62   20.52
  -6   6   4  490.04   19.29
   6   6  -4  504.05   20.33
  -6  -6   4  463.88   19.31
  -6   6   4  485.82   20.00
  -6  -6   4  504.40   20.97
   6  -6  -4  434.35   20.05
   6   6  -4  455.35   20.32
   6  -6  -4  484.21   20.65
  -6   6   4  463.54   20.44
  -6  -6   4  515.45   19.58
   5  -5   5  525.52   20.39
  -5  -5  -5  513.64   21.83
  -5  -5  -5  518.12   20.75
   5   5   5  461.77   20.05
   5   5   5  510.46   20.62
   5   5   5  509.40   21.21
  -5  -5  -5  539.61   21.13
  -5   5  -5  514.70   21.59
  -5  -5  -5  502.08   21.59
   5  -5   5  537.96   21.25
   5   5   5  527.39   21.22
   5  -5   5  592.09   23.02
  -5   5  -5  508.58   21.05
  -5   5  -5  503.43   20.45
  -5   5  -5  507.31   22.21
   5  -5   5  536.99   21.24
   5  -5   5  522.19   20.33
  -9  -3  -5   19.58    3.31
  -9   3  -5   15.42    5.10
   9  -3   5   15.78    3.34
   9  -3   5   15.87    2.38
   9  -3   5   20.11    3.56
   9  -3   5   18.03    4.24
  -9   3  -5   16.51    5.63
   9   3   5   17.02    3.61
  -9  -3  -5   16.76    4.42
   9   3   5   13.45    4.52
   9   3   5   11.88    2.36
  -9  -3  -5   13.45    4.97
   9   3   5   18.44    3.66
  -9  -3  -5   14.32    4.99
  -9   3  -5   16.00    3.79
  -9   3  -5   14.88    4.55
  -9   3  -5   19.48    4.87
   9   3   5    9.24    4.86
  -9   3  -5   13.06    5.57
  12  -4  -1    7.38    3.94
 -12  -4   1   -2.18    4.32
  12   4  -1    7.27    3.56
 -12   4   1    1.53    4.84
 -12   4   1    7.70    4.29
 -12  -4   1    5.50    3.79
  12  -4  -1    8.29    4.09
 -12   4   1    2.23    4.19
 -12   4   1    1.11    4.07
 -12  -4   1    7.10    4.23
  12  -4  -1    4.38    3.89
 -12   4   1    8.93    3.36
  12   4  -1    2.00    4.10
  12   4  -1    7.57    3.69
  12   4  -1    4.80    3.68
  12  -4  -1    4.78    5.18
 -12  -4   1    4.65    4.28
 -12  -4   1    1.75    3.66
  10  -2   5 4544.77  173.63
 -10  -2  -5 4367.45  173.61
 -10  -2  -5 4703.66  174.33
  10   2   5 4394.82  173.97
  10  -2   5 4562.76  174.24
  10   2   5 4573.76  172.92
 -10   2  -5 4721.08  174.64
  10   2   5 4438.39  174.39
 -10   2  -5 4432.55  174.54
  10   2   5 4506.04  173.44
  10  -2   5 4536.88  172.96
  10  -2   5 4636.41  173.26
  10   2   5 4439.61  174.25
 -10   2  -5 4605.26  173.65
  10   2   5 4481.67  173.60
 -10   2  -5 4504.75  174.22
  -6   2  -8   26.69    3.82
   6  -2   8   25.89    2.97
   6  -2   8   22.18    3.65
   6   2   8   31.24    5.84
  -6  -2  -8   23.82    4.88
   6  -2   8   24.98    4.64
  -6  -2  -8   25.41    4.70
  -6  -2  -8   24.04    3.03
   6   2   8   21.07    3.12
  -6   2  -8   24.86    4.66
 -11   3  -3  589.98   25.11
 -11  -3  -3  613.94   24.40
  11  -3   3  595.70   24.05
  11   3   3  565.39   24.73
 -11   3  -3  617.28   24.39
  11  -3   3  608.18   23.79
  11   3   3  563.67   23.78
 -11  -3  -3  591.59   24.64
  11  -3   3  579.60   24.80
  11  -3   3  624.55   24.31
  11   3   3  617.39   24.25
 -11   3  -3  561.65   24.98
 -11   3  -3  620.26   24.92
  11  -3   3  604.77   25.56
 -11   3  -3  629.99   25.23
  11   3   3  612.13   24.25
 -11  -3  -3  588.01   24.92
 -11  -3  -3  565.22   24.80
  11   3   3  616.10   24.99
   0   6  -5 2617.81   98.48
   0  -6  -5 2581.47   98.13
   0   6   5 2630.57   98.19
   0  -6   5 2626.39   98.92
   0  -6  -5 2622.99   98.57
   0   6   5 2583.22   97.60
   0  -6   5 2298.75   99.07
   0  -6   5 2642.27   97.94
   0   6   5 2573.26   98.55
   0  -6   5 2399.98   97.23
   0  -6  -5 2345.55   98.40
   0   6  -5 2673.99   98.49
   0   6  -5 2626.47   98.01
   0   6   5 2577.18   97.37
   4   6   3  306.91   12.59
   4  -6   3  297.03   13.94
   4  -6   3  298.05   12.89
  -4   6  -3  298.25   12.52
  -4   6  -3  318.25   13.87
   4   6   3  315.62   12.74
   4   6   3  298.18   13.03
  -4  -6  -3  304.88   13.48
  -4  -6  -3  291.95   13.33
  -4  -6  -3  303.48   13.21
  -4   6  -3  297.39   13.02
  -4   6  -3  186.18   13.11
  -4  -6  -3  268.26   12.84
  -4  -6  -3  280.18   13.06
   4  -6   3  289.49   12.08
   4   6   3  270.01   11.93
   5   1   9  697.11   28.65
   5  -1   9  633.94   26.78
  -5   1  -9  749.00   29.18
   5  -1   9  716.21   28.55
   5   1   9  708.70   27.14
   5   1   9  762.91   29.26
  -5   1  -9  745.04   28.40
  -5  -1  -9  708.43   28.64
  -5  -1  -9  705.24   27.60
  -5   1  -9  747.64   27.68
  -5  -1  -9  735.48   28.05
  12  -4  -6  130.12    7.61
 -12  -4   6  126.25    6.73
  12   4  -6  117.70    6.06
  12  -4  -6  124.32    7.31
 -12  -4   6  109.17    7.22
 -12  -4   6  118.54    7.60
  12  -4  -6  129.37    6.79
 -12  -4   6  111.48    5.96
  12   4  -6   98.69    7.12
 -12   4   6  128.87    7.10
  12  -4  -6  124.04    6.23
 -12   4   6  126.71    5.74
  12   4  -6  114.28    6.45
  12   4  -6  119.34    7.46
 -12   4   6  122.03    7.62
 -12   4   6  118.31    6.80
 -13  -3   0  385.78   18.03
  13  -3   0  417.53   18.18
  13   3   0  433.64   18.19
  13   3   0  435.83   18.09
  13   3   0  445.16   18.38
 -13  -3   0  461.38   18.22
 -13   3   0  443.46   18.38
 -13   3   0  430.99   18.21
 -13   3   0  441.72   18.56
  13  -3   0  429.59   18.02
  13  -3   0  448.59   19.03
  13  -3   0  418.91   17.91
 -13   3   0  448.86   18.26
 -13  -3   0  431.04   18.20
 -13  -3   0  427.46   18.87
  13   3   0  405.05   18.18
 -14   0  -1    1.39    4.27
  14   0   1   -1.28    4.19
  14   0   1    3.86    4.25
 -14   0  -1    3.75    4.42
  14   0   1    7.52    4.79
 -14   0  -1    3.25    3.81
  -6  -6  -1    1.71    4.32
  -6   6  -1   -0.81    3.23
  -6  -6  -1    5.17    4.17
   6  -6   1    0.14    3.28
   6   6   1    1.45    4.07
   6   6   1   -1.35    2.84
  -6  -6  -1   -0.31    4.52
  -6   6  -1    1.88    4.36
  -6   6  -1    2.74    3.83
   6  -6   1    1.43    3.57
   6   6   1    4.88    3.41
   6  -6   1   -4.22    4.48
  -6   6  -1    6.02    4.41
   6  -6   1   -3.41    4.45
  -6  -6  -1   -5.81    4.36
   6   6   1    0.20    4.83
  -3  -5   8  520.62   21.36
   3   5  -8  509.88   21.13
  -3  -5   8  440.94   22.33
  -3  -5   8  534.33   20.10
   3   5  -8  499.06   21.12
  -3   5   8  509.46   21.69
   3  -5  -8  475.47   21.09
   3   5  -8  536.36   20.41
   3  -5  -8  504.11   20.60
   3  -5  -8  449.60   20.78
   3  -5  -8  498.51   20.89
  -3   5   8  529.03   21.28
  -2   2 -10   98.22    6.32
  -2   2 -10   80.42    4.46
  -2   2 -10   93.77    7.62
  -2  -2 -10   79.87    5.87
   2   2  10   88.98    6.77
   2   2  10   95.09    6.60
  -2  -2 -10   72.51    4.25
   2  -2  10   83.59    4.83
   2   2  10   84.33    4.89
   2  -2  10  100.74    6.22
  -2  -2 -10   79.85    4.82
  -2   2 -10   93.45    4.74
  -2  -2 -10   81.46    6.23
   6   0 -12  118.57    6.41
   6   0 -12   90.60    7.23
   6   0 -12  126.17    7.73
   6   0 -12  122.69    6.50
   6   0 -12  115.77    6.65
   6   0 -12  120.98    6.10
   5   5  -8  718.48   28.40
   5  -5  -8  674.33   28.42
  -5   5   8  688.07   27.07
  -5  -5   8  648.56   26.97
  -5  -5   8  716.38   29.45
   5   5  -8  766.05   28.34
   5   5  -8  738.10   27.90
  -5   5   8  770.31   28.75
  -5  -5   8  754.14   28.80
   5  -5  -8  729.86   28.06
   5  -5  -8  697.75   27.97
  -5   5   8  749.84   28.91
  15   1  -7   72.70    5.53
  15  -1  -7   79.09    5.70
  15  -1  -7   70.92    5.90
  15   1  -7   69.48    4.49
 -15  -1   7   79.73    5.86
  15   1  -7   68.63    5.26
 -15   1   7   53.83    2.95
 -15   1   7   71.41    6.05
  15  -1  -7   75.15    5.25
  15  -1  -7   72.28    5.38
 -15  -1   7   71.05    4.36
 -15  -1   7   73.14    5.88
   0   4  -9   35.66    4.00
   0  -4  -9   35.85    5.40
   0   4   9   41.56    4.26
   0   4  -9   37.80    4.03
   0   4  -9   31.04    5.37
   0  -4   9   42.63    4.82
   0  -4  -9   35.95    4.46
   0   4  -9   35.44    2.46
   0  -4   9    5.25    6.42
   0   4   9   33.34    4.24
   0  -4  -9   36.22    3.24
   0  -4  -9   46.28    3.62
   0  -4   9   36.23    4.10
  12   2   3  833.47   33.18
 -12  -2  -3  822.39   33.24
  12  -2   3  858.38   32.98
 -12   2  -3  834.27   33.84
  12  -2   3  811.83   32.39
  12   2   3  821.52   32.95
 -12   2  -3  856.33   33.51
  12   2   3  814.04   33.37
  12  -2   3  813.20   32.55
 -12   2  -3  833.70   33.73
 -12   2  -3  806.78   32.89
  12   2   3  822.11   32.43
 -12  -2  -3  833.41   33.03
 -12  -2  -3  809.00   33.47
  -3  -1 -10  564.70   22.41
   3   1  10  531.79   22.71
   3   1  10  531.72   20.92
  -3   1 -10  556.19   21.31
  -3  -1 -10  581.80   21.78
  -3   1 -10  558.81   22.95
  -3   1 -10  484.26   20.50
  -3   1 -10  560.14   22.10
  -3  -1 -10  542.01   21.28
   3  -1  10  551.14   22.32
   3   1  10  548.36   22.47
  14   0  -9    7.96    4.73
  14   0  -9    2.98    4.18
  14   0  -9    2.31    3.81
 -14   0   9    5.78    4.32
 -14   0   9    0.62    2.31
  -5  -3  -8  259.09   12.33
   5  -3   8  269.37   12.50
   5   3   8  253.79   11.80
   5  -3   8  287.97   11.79
  -5  -3  -8  279.73   13.64
  -5   3  -8  268.45   11.58
   5   3   8  291.52   13.09
   5  -3   8  286.48   11.49
  -5   3  -8  263.60   11.49
  -5   3  -8  271.47   12.45
  -5  -3  -8  277.60   11.10
 -14   2   0    2.44    4.38
 -14  -2   0    6.79    4.45
  14  -2   0    4.31    3.74
  14   2   0    3.30    4.12
  14  -2   0   -0.47    4.19
  14  -2   0    9.04    5.69
 -14  -2   0    4.72    3.88
  14   2   0    4.99    4.62
  14   2   0    1.88    3.77
  14  -2   0    5.91    3.96
  14   2   0    2.72    4.12
 -14   2   0    7.17    4.67
 -14  -2   0    5.23    4.17
  14  -2   0    4.70    4.06
   3   3   9   73.32    6.49
  -3  -3  -9   93.04    5.80
  -3   3  -9   86.47    4.25
   3  -3   9   85.80    5.13
   3   3   9   87.31    6.57
  -3  -3  -9   71.68    3.34
  -3   3  -9   85.92    5.84
  -3   3  -9   83.23    4.64
   3  -3   9   86.13    5.62
   3   3   9   82.63    5.15
  -3  -3  -9   86.90    5.19
   4   0 -12  110.01    7.08
   4   0 -12  121.43    7.54
   4   0 -12   88.77    8.10
   4   0 -12  117.76    6.45
   4   0 -12  116.59    5.87
   4   0 -12  125.19    6.15
  11  -1 -11 1036.10   38.94
  11   1 -11  997.41   38.48
  11  -1 -11  989.18   38.90
  11   1 -11 1030.72   38.16
  11   1 -11  925.54   38.48
  11  -1 -11  990.49   38.30
  11  -1 -11  861.01   37.92
 -11  -1  11  793.36   38.84
  11  -1 -11 1013.96   38.81
  11   1 -11 1024.53   39.03
  11   1 -11  992.37   38.77
 -11   1  11 1115.86   39.09
  11  -1 -11 1039.73   38.24
  11   1 -11 1007.85   38.13
  14   2  -8   35.96    2.95
  14  -2  -8   39.81    4.96
 -14  -2   8   41.77    4.85
  14   2  -8   40.85    5.13
 -14  -2   8   38.88    4.19
  14  -2  -8   45.69    4.38
 -14   2   8   44.85    3.59
  14   2  -8   38.05    4.29
 -14   2   8   41.29    4.76
 -14  -2   8   30.58    5.12
  14  -2  -8   43.01    5.65
  14  -2  -8   38.00    3.28
   7  -1   8  260.89   11.73
  -7   1  -8  243.35   10.68
  -7  -1  -8  220.75   10.95
   7   1   8  232.01    9.86
  -7  -1  -8  246.41   11.84
  -7  -1  -8  221.78   10.51
   7   1   8  243.69   12.42
  -7   1  -8  225.96   11.04
   7   1   8  225.75   11.58
  -7   1  -8  235.03   11.85
   7  -1   8  235.07    9.45
  15   1  -1    2.50    4.28
 -15  -1   1    2.47    4.34
 -15   1   1    2.74    3.76
  15  -1  -1    3.43    4.23
 -15   1   1    4.21    4.19
 -15   1   1    2.40    3.94
 -15   1   1   -4.05    4.91
  15  -1  -1    5.29    5.71
 -15  -1   1   10.64    4.44
  15  -1  -1    2.19    3.99
  15  -1  -1   10.98    4.39
 -15  -1   1    2.11    4.00
   8   0 -12 2972.39  111.14
   8   0 -12 3026.29  111.40
   8   0 -12 2961.19  111.18
   8   0 -12 2643.81  111.27
   8   0 -12 2855.05  111.16
   5   1 -12  606.84   24.79
   5  -1 -12  576.78   23.56
   5  -1 -12  491.02   22.61
   5   1 -12  595.57   22.79
   5  -1 -12  605.54   23.04
   5   1 -12  575.64   24.13
   5   1 -12  560.36   23.31
   5  -1 -12  578.73   23.68
   5  -1 -12  584.52   24.21
   5  -1 -12  583.71   24.08
   5   1 -12  584.07   23.15
   5   1 -12  600.69   23.21
  12   0   4 5047.21  199.45
 -12   0  -4 5041.29  199.57
 -12   0  -4 5182.41  199.40
  12   0   4 5419.94  198.75
  12   0   4 5128.18  199.88
   6  -6  -5  690.51   27.29
  -6   6   5  763.93   27.09
  -6  -6   5  770.16   28.51
  -6  -6   5  758.85   27.79
  -6  -6   5  688.13   26.32
  -6  -6   5  765.17   26.58
   6   6  -5  762.32   27.52
   6   6  -5  748.62   27.38
   6  -6  -5  766.35   27.97
 -12   2  10  529.17   21.12
  12  -2 -10  559.17   20.59
  12   2 -10  514.47   20.04
  12   2 -10  475.07   19.96
  12   2 -10  515.92   20.75
 -12  -2  10  387.38   21.14
  12   2 -10  416.26   20.61
  12  -2 -10  567.22   21.66
  12  -2 -10  546.68   20.43
  12   2 -10  596.16   22.10
 -12  -2  10  531.01   21.91
  12   2 -10  538.52   19.95
  12  -2 -10  590.85   21.42
   7   1 -12   14.50    4.80
   7  -1 -12   14.21    4.21
   7  -1 -12   11.67    3.83
   7   1 -12   10.18    3.99
   7   1 -12    8.27    3.55
   7   1 -12    4.56    3.21
   7   1 -12    6.20    3.83
   7  -1 -12   10.27    4.50
   7   1 -12    9.21    2.92
   7  -1 -12    8.86    3.27
   7  -1 -12    7.23    4.11
   7  -1 -12    9.39    4.72
 -12   4   0 1613.67   61.96
 -12   4   0 1632.86   61.53
  12  -4   0 1568.97   61.66
  12   4   0 1585.63   61.64
 -12  -4   0 1679.59   62.22
  12  -4   0 1568.02   61.40
 -12   4   0 1770.38   62.02
 -12   4   0 1550.83   62.16
  12   4   0 1540.71   61.57
  12   4   0 1580.38   61.59
  12  -4   0 1630.56   61.66
  12  -4   0 1336.63   61.80
 -12  -4   0 1538.79   61.58
 -12   4   0 1565.40   61.64
  12   4   0 1567.23   61.79
 -12  -4   0 1603.53   61.87
  12  -4   0 1582.37   62.24
 -10   4  -3 1780.13   68.52
  10  -4   3 1791.61   69.10
  10  -4   3 1784.36   68.19
 -10  -4  -3 1810.90   69.22
  10   4   3 1738.62   68.30
 -10  -4  -3 1748.65   68.87
  10   4   3 1701.59   68.73
 -10  -4  -3 1801.05   69.26
  10   4   3 1754.24   68.40
  10  -4   3 1828.19   68.56
  10   4   3 1743.95   69.05
 -10   4  -3 1780.04   69.50
  10   4   3 1749.61   69.10
  10  -4   3 1793.64   69.81
 -10  -4  -3 1687.23   68.52
  10  -4   3 1779.24   68.62
 -10   4  -3 1839.25   69.18
   1   5  -8  188.14    8.84
   1   5  -8  175.27    7.83
   1   5  -8  180.63    9.61
  -1  -5   8  171.27    9.33
  -1  -5   8  175.63    8.17
   1  -5  -8  167.83    9.32
   1  -5  -8  169.37    8.17
   1  -5  -8  178.87    8.93
  -1   5   8  174.66    8.99
  -1   5   8  173.43    7.83
 -10   0  -616909.10  620.18
  10   0   615744.70  619.38
 -10   0  -616459.30  619.49
 -10   0  -616191.30  619.25
  10   0   615819.20  618.57
  10   0   616535.00  618.36
  10   2 -11  716.41   28.16
  10  -2 -11  780.99   29.07
  10  -2 -11  728.34   29.27
  10  -2 -11  719.81   27.95
  10   2 -11  786.84   28.90
  10  -2 -11  827.00   28.70
  10   2 -11  744.60   27.84
  10   2 -11  796.10   29.56
  10  -2 -11  746.30   28.51
 -10   2  11  773.96   28.75
  10  -2 -11  621.82   28.07
  10   2 -11  617.92   28.56
  10   2 -11  766.00   28.17
 -13  -1  10 1822.56   67.93
  13   1 -10 1798.45   67.39
  13  -1 -10 1768.23   67.57
  13  -1 -10 1754.95   66.87
 -13   1  10 1734.88   67.50
  13   1 -10 1708.87   67.14
  13   1 -10 1789.58   66.68
 -13  -1  10 1629.87   67.10
  13  -1 -10 1737.83   67.40
  13   1 -10 1712.68   67.50
  13  -1 -10 1681.70   66.32
  -8  -4  -5   53.26    5.92
  -8   4  -5   55.34    4.54
   8  -4   5   68.07    5.00
   8   4   5   58.40    5.61
  -8  -4  -5   62.48    4.23
   8   4   5   75.17    6.18
  -8  -4  -5   55.77    5.22
   8   4   5   46.71    4.52
   8   4   5   59.47    3.83
  -8   4  -5   60.76    6.13
   8  -4   5   55.06    3.58
  -8  -4  -5   67.14    6.33
   8   4   5   58.72    4.20
   8  -4   5   68.10    5.49
  -8   4  -5   51.66    6.30
   8  -4   5   56.05    4.34
  -8   4  -5   58.48    4.39
  -7   5  -4  388.01   15.44
   7   5   4  346.92   15.11
   7  -5   4  366.77   15.19
   7   5   4  373.80   16.07
   7  -5   4  433.48   18.02
  -7   5  -4  357.38   16.83
   7   5   4  375.74   16.48
  -7   5  -4  372.05   15.92
   7   5   4  357.81   15.39
   7  -5   4  360.96   15.91
  -7  -5  -4  365.27   16.49
   7   5   4  366.67   16.19
  -7  -5  -4  369.07   16.10
  -7  -5  -4  382.47   16.75
  -7  -5  -4  379.08   15.67
  -7   5  -4  383.84   16.43
   7  -5   4  369.45   16.24
   7  -5   4  390.81   15.38
   8  -2   7 2180.99   87.51
   8   2   7 2180.19   86.63
   8  -2   7 2360.09   86.90
  -8   2  -7 2252.10   86.80
   8   2   7 2219.67   87.83
  -8  -2  -7 2193.87   86.68
   8  -2   7 2312.19   86.45
  -8  -2  -7 2267.34   87.67
  -8   2  -7 2279.29   87.57
 -13   3   8  971.09   35.55
 -13  -3   8  945.17   35.10
  13  -3  -8  969.84   34.66
 -13   3   8 1022.77   35.08
  13   3  -8  950.05   35.00
  13   3  -8  946.69   35.22
 -13  -3   8  969.21   35.52
  13  -3  -8  970.60   34.83
  13  -3  -8 1012.15   36.03
  13  -3  -8  985.43   35.55
  -5  -3  11  367.05   15.78
   5  -3 -11  355.05   12.32
   5  -3 -11  405.53   14.51
   5   3 -11  417.33   13.99
   5  -3 -11  391.62   13.24
   5  -3 -11  416.82   13.89
   5   3 -11  386.32   12.83
   5  -3 -11  374.79   12.75
  -5   3  11  449.80   14.42
   5   3 -11  387.20   14.42
   5   3 -11  393.39   14.06
   5   3 -11  431.18   14.85
  -5  -3  11  372.66   12.93
  -9  -5   7    3.40    4.81
  -9  -5   7   -3.93    2.73
  -9   5   7    0.55    4.52
   9   5  -7   -3.04    4.95
  -9   5   7    2.49    3.35
   9  -5  -7   -1.01    2.73
  -9  -5   7  -13.95    4.08
   9  -5  -7    1.32    4.38
   9   5  -7    1.81    3.50
   7   5  -8  267.32   12.17
  -7  -5   8  267.85   13.00
   7   5  -8  299.17   11.84
   7   5  -8  303.95   11.66
  -7   5   8  259.37   12.56
   7  -5  -8  300.11   11.88
  -7   5   8  286.16   12.33
  -7   5   8  284.81   10.86
   7  -5  -8  275.44   11.94
   7  -5  -8  261.79   11.10
  -7  -5   8  215.93   10.05
  11   1   5  324.91   13.96
  11   1   5  340.77   14.80
  11  -1   5  320.22   14.57
  11   1   5  340.52   15.14
 -11   1  -5  321.92   14.61
 -11  -1  -5  320.44   15.49
 -11  -1  -5  309.39   14.52
  11   1   5  333.69   13.53
  11  -1   5  346.74   13.73
  11  -1   5  350.18   13.76
 -11   1  -5  357.62   16.29
 -11   1  -5  328.72   15.01
 -11   5   3 1755.48   67.73
 -11   5   3 1730.70   68.03
 -11   5   3 1741.88   67.44
 -11   5   3 1719.69   67.16
  11  -5  -3 1688.45   67.97
  11  -5  -3 1738.19   68.00
 -11  -5   3 1798.18   67.66
 -11  -5   3 1716.81   67.50
  11   5  -3 1763.14   67.67
 -11  -5   3 1751.29   67.12
  11   5  -3 1743.90   68.06
  11   5  -3 1763.47   68.01
 -11   5   3 1649.26   68.02
  11  -5  -3 1714.01   67.75
 -11  -5   3 1785.00   68.30
  11  -5  -3 1821.90   67.89
   7   3   7    6.88    3.30
  -7  -3  -7    5.91    5.14
   7   3   7   10.13    4.74
   7   3   7    6.71    1.17
  -7  -3  -7   15.54    4.17
   7  -3   7   15.55    3.20
   7  -3   7    6.49    4.50
   7   3   7   11.61    5.56
  -7  -3  -7   10.69    2.81
   7  -3   7    7.43    3.44
  -7   3  -7    8.22    3.42
  -7   3  -7   17.15    4.55
  -7   3  -7    3.50    5.22
  12   4  -7  827.02   31.27
 -12  -4   7  795.77   31.32
 -12  -4   7  826.35   32.45
 -12   4   7  808.57   31.88
  12  -4  -7  780.13   31.84
 -12   4   7  817.16   32.12
  12  -4  -7  814.96   32.10
  12   4  -7  769.07   32.09
  12   4  -7  767.47   31.59
  12  -4  -7  798.58   31.21
 -12  -4   7  791.14   31.62
  -2  -6   6  376.96   17.61
   2   6  -6  502.85   19.39
   2  -6  -6  486.22   19.39
  -2   6   6  491.30   19.58
  -2   6   6  491.43   18.08
  -2   6   6  468.33   18.05
   2  -6  -6  470.94   19.56
  -2   6   6  509.76   19.24
   2   6  -6  516.98   18.95
   2  -6  -6  500.76   19.14
   2   6  -6  529.73   19.59
  -2  -6   6  522.13   18.55
  -2  -6   6  518.12   20.02
   9  -5   2  422.70   16.82
   9   5   2  376.79   16.79
  -9   5  -2  390.21   17.83
  -9   5  -2  405.66   16.92
  -9  -5  -2  396.67   17.01
   9  -5   2  404.65   17.30
   9   5   2  396.29   17.26
   9   5   2  376.72   17.32
   9  -5   2  399.27   17.52
   9  -5   2  470.25   18.88
  -9   5  -2  401.89   17.33
  -9  -5  -2  402.32   18.10
   9  -5   2  403.42   16.88
  -9  -5  -2  411.66   17.28
   9   5   2  399.13   16.92
  -9  -5  -2  427.36   17.66
  -9   5  -2  392.50   17.88
   9   5   2  427.89   17.45
  16   0  -5   -3.47    3.90
  16   0  -5    0.59    4.17
 -16   0   5   -0.49    4.74
 -16   0   5    1.24    4.27
 -16   0   5   -0.54    1.31
  16   0  -5    3.64    4.72
 -16   0   5    4.54    2.63
  16   0  -4  153.75    8.14
  16   0  -4  159.70    8.83
 -16   0   4  145.10    8.39
 -16   0   4  156.69    6.75
  16   0  -4  152.04    8.25
 -16   0   4  148.45    7.25
   4  -6  -6   22.08    4.15
   4   6  -6   20.64    4.76
  -4  -6   6   23.41    5.06
  -4  -6   6   17.40    1.97
  -4   6   6   16.03    2.84
  -4  -6   6   19.66    5.65
  -4   6   6   20.52    4.68
  -4  -6   6   19.18    2.67
   4  -6  -6   17.03    4.12
   4   6  -6   19.97    3.90
   4  -6  -6   13.73    4.25
   4   6  -6   18.73    4.20
   6  -6   2  120.73    7.47
  -6  -6  -2  129.24    7.81
   6   6   2  126.10    6.96
   6  -6   2  117.08    8.76
   6   6   2  136.09    7.38
   6   6   2  135.96    6.69
  -6   6  -2  139.08    7.65
  -6   6  -2  128.74    6.94
  -6  -6  -2  138.54    7.55
  -6  -6  -2  119.61    7.39
  -6  -6  -2  130.09    7.88
   6   6   2  115.35    7.28
  -6   6  -2  121.60    8.00
   6  -6   2  132.87    6.91
   6  -6   2  126.77    6.57
   6  -6   2  115.77    8.33
  -6   6  -2  128.60    7.65
   6   6   2  127.34    8.43
  -1   1 -11  753.38   30.56
  -1   1 -11  713.88   28.76
  -1  -1 -11  759.13   29.91
  -1  -1 -11  705.42   30.57
   1  -1  11  751.62   29.74
   1   1  11  737.53   29.89
  -1   1 -11  689.18   28.28
  -1  -1 -11  756.56   28.50
  -1  -1 -11  766.32   29.26
   1   1  11  687.96   28.62
  -1  -1 -11  794.19   29.97
  -1   1 -11  790.65   29.68
   4  -4 -10   74.60    4.85
   4  -4 -10   80.07    5.84
   4  -4 -10   65.57    3.33
  -4   4  10   64.38    5.66
  -4  -4  10   85.79    4.26
  -4  -4  10   50.46    7.13
   4  -4 -10   81.78    5.64
  -4  -4  10   74.28    6.21
   4   4 -10   78.90    6.16
   4   4 -10   78.50    5.35
   4   4 -10   85.57    4.58
  11  -5  -4  436.14   18.43
 -11   5   4  437.05   17.36
 -11   5   4  409.13   17.97
 -11  -5   4  435.09   16.98
  11   5  -4  427.02   17.73
  11   5  -4  424.76   18.41
  11   5  -4  433.66   17.82
 -11   5   4  443.37   18.38
 -11  -5   4  456.22   18.68
 -11  -5   4  412.97   17.62
  11   5  -4  426.35   18.28
 -11  -5   4  438.26   17.84
  11  -5  -4  397.17   17.66
 -11   5   4  418.30   18.23
  11  -5  -4  416.05   18.24
 -11   5   4  412.59   17.23
   1   3  10  911.47   33.89
  -1   3 -10  828.43   32.61
  -1   3 -10  928.94   34.92
  -1   3 -10  877.38   33.03
   1   3  10  839.46   32.92
   1  -3  10  879.67   32.88
   1   3  10  852.48   33.39
  -1   3 -10  777.46   31.98
  -1  -3 -10  870.05   34.34
   1  -3  10  923.13   33.37
  -1  -3 -10  883.10   33.08
  -1  -3 -10  823.31   32.76
  -1  -3 -10  785.68   31.90
   7  -3 -11  303.26   12.74
   7  -3 -11  307.61   12.43
   7   3 -11  233.19   10.81
   7  -3 -11  316.53   12.26
   7  -3 -11  277.07   12.42
   7  -3 -11  270.27   11.04
   7   3 -11  319.52   13.09
   7   3 -11  305.56   12.24
   7  -3 -11  297.94   11.38
  -7   3  11  314.35   12.88
   7   3 -11  317.70   12.70
  11   5  -2  165.65    7.33
 -11  -5   2  138.93    7.90
  11  -5  -2  140.46    7.93
 -11   5   2  149.20    8.17
 -11   5   2  146.18    8.09
 -11   5   2  149.45    7.63
  11   5  -2  135.47    8.17
 -11   5   2  147.22    7.32
 -11   5   2  141.35    8.26
  11  -5  -2  143.11    8.40
 -11  -5   2  139.26    8.26
 -11  -5   2  146.01    8.45
  11  -5  -2  149.03    8.33
  11   5  -2  142.69    7.97
  11   5  -2  141.36    8.07
 -11  -5   2  149.50    7.20
 -11  -5   2  126.04    7.36
  11  -5  -2  140.72    8.00
  -6   4  10 1841.21   68.42
   6  -4 -10 1815.30   69.48
  -6   4  10 1753.53   69.71
   6  -4 -10 1592.41   69.48
   6   4 -10 1822.05   69.35
   6  -4 -10 1808.83   69.16
  -6  -4  10 1793.94   70.62
   6   4 -10 1765.02   69.62
   6   4 -10 1749.14   69.85
   8  -6  -2    8.22    4.19
  -8  -6   2   13.56    4.89
   8   6  -2    8.34    4.08
   8  -6  -2   19.04    4.62
  -8  -6   2   10.59    3.50
   8  -6  -2   16.31    4.22
   8  -6  -2   14.12    4.59
  -8  -6   2   15.55    4.14
  -8   6   2   16.34    4.03
  -8   6   2   11.17    4.07
  -8  -6   2   15.95    4.44
   8   6  -2   12.57    4.55
   8   6  -2   15.19    4.75
  -8   6   2   10.29    3.85
  -8   6   2   18.76    4.40
   8   6  -2    9.74    4.28
   8   6  -2   12.03    4.20
  12   0 -11   -4.09    4.12
  12   0 -11    2.97    2.12
 -12   0  11    0.20    4.29
  12   0 -11    0.43    2.45
  12   0 -11    1.02    4.33
  12   0 -11    5.54    3.80
 -15   1   8   12.47    4.14
 -15  -1   8    4.46    4.47
  15  -1  -8    5.66    3.86
  15   1  -8    1.22    3.10
  15   1  -8    2.06    4.06
  15  -1  -8    7.35    4.31
 -15  -1   8    3.09    4.60
 -15  -1   8   -4.99    3.07
  15   1  -8    2.25    4.22
   2   6   5  901.18   35.66
   2   6   5  865.07   34.84
  -2   6  -5  938.46   36.04
   2  -6   5  914.09   37.14
   2   6   5  904.00   35.48
  -2  -6  -5  899.45   35.68
   2  -6   5  887.23   35.70
  -2  -6  -5  874.27   36.32
  -2   6  -5  941.33   35.52
   2   6   5  920.13   36.15
   2  -6   5  900.13   34.88
  -2  -6  -5  957.38   36.54
  -8   6   3   45.38    4.62
   8  -6  -3   42.04    5.19
  -8   6   3   44.01    4.98
  -8  -6   3   52.42    5.60
  -8   6   3   48.64    5.17
   8   6  -3   39.49    4.87
   8   6  -3   46.84    5.20
   8   6  -3   40.44    5.08
  -8   6   3   47.14    4.04
   8  -6  -3   54.27    4.91
   8   6  -3   40.44    4.85
  -8  -6   3   46.38    4.65
   8  -6  -3   46.29    5.67
  -8  -6   3   41.52    3.76
  -8  -6   3   45.82    4.76
   3  -1 -12  225.18    9.61
   3   1 -12  220.79   11.69
   3   1 -12  210.47   10.30
   3  -1 -12  211.68    9.56
   3   1 -12  221.04   11.79
   3  -1 -12  171.78   11.75
   3   1 -12  209.97   10.02
   3   1 -12  216.00    9.62
   3  -1 -12  213.94    9.46
   3  -1 -12  242.28   10.88
  -3  -1  12  209.28   10.26
   3  -1 -12  232.58   10.61
   3   1 -12  225.40    9.24
  -4   0 -10  506.74   20.51
  -4   0 -10  554.02   19.62
   4   0  10  582.95   20.60
   4   0  10  560.99   21.30
  -4   0 -10  587.97   19.54
   0  -2  11 4616.65  158.59
   0   2 -11 4480.81  157.55
   0  -2 -11 3853.56  157.17
   0  -2 -11 4602.75  159.55
   0  -2 -11 4433.15  157.81
   0   2  11 4402.02  158.95
   0  -2 -11 3702.72  157.10
   0   2  11 4394.95  158.02
   0   2 -11 4481.51  157.76
   0   2 -11 4755.52  159.94
   0  -2 -11 4366.41  157.44
   0  -2 -11 3871.27  157.41
   0  -2 -11 4558.22  158.54
   0   2 -11 4493.55  158.31
  13  -3   1  692.56   27.95
 -13   3  -1  666.20   28.42
  13  -3   1  703.30   28.32
 -13  -3  -1  711.17   28.47
 -13   3  -1  693.53   28.36
  13   3   1  701.98   28.50
  13   3   1  698.22   28.08
 -13  -3  -1  687.74   28.87
  13   3   1  717.97   28.55
  13  -3   1  724.69   28.17
  13  -3   1  726.57   29.36
  13   3   1  674.62   28.26
 -13  -3  -1  677.37   28.36
 -13   3  -1  727.36   28.71
 -13   3  -1  711.78   28.83
 -13  -3  -1  689.79   28.46
  16   0  -6   71.07    5.74
 -16   0   6   75.39    4.02
  16   0  -6   77.56    5.94
  16   0  -6   65.12    5.13
 -16   0   6   71.33    6.40
  16   0  -3    0.19    4.17
 -16   0   3    2.18    2.81
 -16   0   3    0.87    4.21
   3  -3 -11    9.47    4.90
   3   3 -11    3.46    3.26
  -3  -3  11    1.02    6.78
  -3  -3  11    6.15    3.19
   3  -3 -11    4.48    3.65
   3   3 -11    3.64    2.39
   3  -3 -11   12.45    2.78
   3  -3 -11    4.49    2.76
   3   3 -11    6.50    3.50
  -3   3  11    5.93    3.73
  -6   0  -9    0.81    3.64
  -6   0  -9    0.51    4.89
  -6   0  -9    4.32    4.15
   6   0   9    6.51    4.58
   6   0   9   -0.04    1.10
   8   6  -1 1042.36   39.45
   8  -6  -1 1032.95   39.23
   8  -6  -1  961.32   39.70
   8  -6  -1 1013.66   39.25
  -8  -6   1 1005.88   39.90
  -8   6   1 1048.18   39.06
   8   6  -1 1041.00   39.59
  -8   6   1  948.17   39.27
  -8  -6   1  970.90   39.35
  -8  -6   1 1012.05   39.49
  -8   6   1  832.25   39.39
   8  -6  -1  999.26   39.72
   8   6  -1  887.40   38.82
  -8  -6   1 1021.03   39.08
  -8  -6   1 1001.99   38.89
  -8   6   1 1064.70   39.39
   8   6  -1  970.80   39.23
  -8   6   1  977.45   39.61
   2   0 -12 1264.53   46.86
   2   0 -12 1138.29   47.23
  -2   0  12 1182.63   47.86
   2   0 -12 1245.30   46.91
   2   0 -12 1241.10   47.86
   2   0 -12 1212.99   48.41
   2   0 -12 1107.21   48.68
 -10  -4   9  197.56    8.24
  10  -4  -9  200.92    8.88
  10   4  -9  131.68    9.18
  10  -4  -9  212.13    9.65
 -10   4   9  194.72    8.66
  10   4  -9  173.01    8.12
  10   4  -9  207.74    9.88
  10  -4  -9  195.99    9.23
 -10   4   9  199.98    9.98
  10   4  -9  209.25    8.60
  10  -4  -9  196.23   10.22
  10  -4  -9  162.99    7.78
 -10  -4   9  186.02   10.39
  13   1   3    3.22    4.67
  13  -1   3    1.69    3.61
 -13   1  -3    5.48    6.29
 -13   1  -3    3.88    5.22
  13  -1   3   -2.42    3.34
 -13   1  -3    5.49    4.40
  13  -1   3   -0.94    4.77
 -13  -1  -3   -0.20    3.71
  13   1   3   -0.46    4.39
  13   1   3    3.75    4.17
  13  -1   3    5.24    4.16
  -4  -6  -4   38.02    4.77
  -4  -6  -4   52.85    5.99
  -4  -6  -4   43.30    5.68
   4   6   4   41.48    4.33
  -4   6  -4   46.06    4.06
   4  -6   4   48.62    4.83
   4  -6   4   45.01    3.57
   4  -6   4   46.85    4.21
  -4  -6  -4   42.48    5.57
  -4   6  -4   40.66    4.46
   4   6   4   46.53    3.47
   4   6   4   46.85    4.62
  -4   6  -4   44.50    5.72
   4   6   4   38.13    4.85
   4  -6   4   40.99    6.69
   9   1 -12  133.61    7.58
   9   1 -12  159.59    7.16
   9   1 -12  149.36    8.20
   9  -1 -12  148.41    7.85
   9  -1 -12  154.78    7.50
   9  -1 -12  134.55    7.60
   9   1 -12  127.67    7.32
   9  -1 -12  144.45    7.49
   9  -1 -12  169.48    8.33
   9   1 -12  132.81    7.73
   9   1 -12  153.82    7.19
   9  -1 -12  130.57    7.68
 -11  -5   5  514.63   20.23
  11   5  -5  514.63   20.21
  11   5  -5  481.08   20.82
  11   5  -5  526.96   20.25
 -11  -5   5  446.66   19.18
 -11  -5   5  413.43   21.08
 -11  -5   5  527.75   20.27
  11   5  -5  502.07   21.07
 -11   5   5  525.80   21.04
  11  -5  -5  492.97   20.68
 -11   5   5  514.07   20.66
 -11   5   5  521.08   19.62
  11  -5  -5  502.09   20.99
 -11   5   5  525.58   20.75
  11  -5  -5  490.18   19.99
  11  -3 -10   20.29    2.01
  11   3 -10   35.17    4.60
  11   3 -10   67.20    3.91
  11  -3 -10   31.98    2.34
  11   3 -10   65.60    5.80
  11  -3 -10   76.20    4.84
 -11  -3  10   50.81    5.62
 -11   3  10   62.24    3.74
  11  -3 -10   72.80    4.57
  11  -3 -10   70.04    5.52
  11   3 -10   73.57    3.62
  -8  -6   4   94.62    4.99
   8  -6  -4  103.42    7.36
   8  -6  -4  101.36    6.23
  -8   6   4   99.61    6.80
  -8   6   4  104.61    6.33
   8   6  -4   95.60    6.49
  -8   6   4   98.46    5.08
   8   6  -4  105.46    6.67
  -8  -6   4   97.43    5.86
  -8   6   4  102.83    6.06
   8   6  -4   96.30    6.43
  -8  -6   4   91.81    6.50
   8   6  -4   95.40    6.85
  -8  -6   4  108.33    7.31
   8  -6  -4  101.70    6.88
  11   5  -1   35.24    4.21
 -11  -5   1   36.68    4.89
  11  -5  -1   27.71    4.87
 -11   5   1   42.77    5.51
 -11  -5   1   38.73    5.39
 -11  -5   1   44.50    4.57
 -11  -5   1   34.31    5.09
  11   5  -1   34.03    4.72
  11  -5  -1   31.36    4.31
  11   5  -1   31.17    4.45
 -11  -5   1   41.82    4.33
 -11   5   1   31.87    4.22
 -11   5   1   41.46    4.71
  11   5  -1   40.85    4.90
  11  -5  -1   47.44    5.69
  11  -5  -1   40.00    4.78
 -11   5   1   35.94    4.75
 -11   5   1   41.37    4.97
   3  -5   7 2548.83   94.35
   3  -5   7 2542.58   94.39
  -3  -5  -7 2452.00   94.27
  -3   5  -7 2453.63   93.55
  -3  -5  -7 2430.44   93.79
  -3   5  -7 2512.49   94.29
   3   5   7 2486.07   93.80
  -3   5  -7 2485.16   95.66
   3   5   7 2408.94   94.17
  -3  -5  -7 2384.75   95.04
   3   5   7 2450.59   94.47
  -3  -5  -7 2530.24   94.09
   3  -5   7 2282.81   95.85
   3  -5   7 2354.55   93.21
   0   6   6  986.15   33.26
   0   6   6 1011.04   32.69
   0   6   6  784.19   31.86
   0   6  -6 1010.37   33.70
   0   6   6  756.79   31.95
   0   6  -6 1035.37   33.05
   0   6   6  982.90   33.79
   0  -6   6  708.67   31.80
   0  -6   6  987.69   33.01
   0  -6  -6 1009.32   33.29
   0  -6   6  949.87   34.88
   0  -6  -6  931.12   33.77
  -1  -7   0  816.18   32.45
   1   7   0  798.64   32.05
  -1  -7   0  760.04   32.48
  -1   7   0  802.74   31.95
   1  -7   0  788.57   32.45
  -1   7   0  813.72   32.08
   1   7   0  775.77   31.99
   1  -7   0  778.62   32.39
  -9   1  -7 1292.50   58.33
  -9   1  -7 1447.03   57.49
   9  -1   7 1549.69   57.66
   9  -1   7 1499.40   58.24
  -9  -1  -7 1661.03   58.67
  -9  -1  -7 1506.47   57.62
   9  -1   7 1543.85   56.70
   9   1   7 1460.20   56.97
   9  -1   7 1520.42   56.52
  -9   1  -7 1439.51   57.88
   9  -1   7 1379.43   56.52
  -2  -4  10 2723.64  102.66
   2   4 -10 2645.57  102.50
  -2  -4  10 2692.20  102.17
   2   4 -10 2713.94  101.75
  -2  -4  10 2517.33  104.07
   2  -4 -10 2657.30  101.80
  -2   4  10 2689.05  102.71
   2  -4 -10 2592.97  102.39
   2  -4 -10 2686.98  101.94
   2  -4 -10 2553.74  103.24
   2   4 -10 2537.72  102.67
   2   4 -10 2682.12  101.97
 -15   1   0   49.26    6.17
 -15   1   0   37.68    5.04
  15  -1   0   47.48    5.06
  15   1   0   53.70    5.52
  15  -1   0   43.42    5.00
  15  -1   0   37.12    5.12
 -15  -1   0   49.97    5.36
 -15   1   0   38.94    5.30
 -15   1   0   45.72    5.41
 -15  -1   0   40.24    5.36
 -15  -1   0   40.69    5.33
 -14   0  -2   73.30    6.40
  14   0   2   73.68    6.01
 -14   0  -2   85.57    6.27
  14   0   2   81.90    6.16
 -14  -2  -1   -3.56    4.46
  14   2   1    3.21    4.48
 -14   2  -1    5.34    4.60
  14  -2   1    0.45    4.58
  14   2   1    3.73    4.71
  14   2   1   -2.57    3.68
 -14   2  -1    2.59    5.35
 -14   2  -1    5.26    4.74
 -14   2  -1   -1.94    4.60
  14  -2   1    1.83    3.92
  14  -2   1   -0.19    4.12
  14  -2   1    0.60    3.72
 -14  -2  -1    1.44    4.21
 -14  -2  -1    0.39    4.41
  10   0 -12 1815.83   67.78
  10   0 -12 1683.96   67.72
  10   0 -12 1844.81   68.09
  10   0 -12 1680.58   67.89
  10   0 -12 1823.05   67.75
  10   0 -12 1660.12   67.91
  -1  -7   1   22.27    5.43
  -1  -7   1   28.26    4.84
   1   7  -1   24.35    4.30
  -1   7   1   10.17    3.96
   1  -7  -1   16.29    5.18
   1   7  -1   20.31    4.58
   1  -7  -1   17.31    5.14
  -1   7   1   29.64    4.53
   4   4   8  866.30   34.63
   4  -4   8  915.74   34.95
   4  -4   8  879.47   34.52
  -4   4  -8  915.42   34.66
  -4  -4  -8  864.36   33.74
  -4  -4  -8  819.93   35.71
  -4   4  -8  844.83   36.01
  -4   4  -8  842.99   33.66
   4  -4   8  691.41   36.03
  -4  -4  -8  892.48   34.60
   4   4   8  920.58   35.11
  -4   4  -8  855.01   34.34
  -4  -4  -8  875.68   34.48
   4   4   8  816.93   35.26
   4  -4   8  924.90   33.76
  -6  -6   6    2.48    1.73
  -6  -6   6    6.03    5.17
   6   6  -6    3.31    4.24
   6   6  -6    1.86    3.77
   6  -6  -6    5.34    4.03
   6  -6  -6   -0.22    4.49
  -6  -6   6   -3.05    4.62
  -6  -6   6   -1.36    2.42
  -6   6   6    1.80    2.93
  -6  -6   6   -0.51    1.61
   6  -2 -12   20.22    4.17
   6  -2 -12   18.77    5.25
  -6  -2  12    3.35    6.18
   6  -2 -12   19.87    3.75
   6  -2 -12   21.78    3.20
  -6   2  12   25.20    4.47
   6   2 -12   25.27    3.99
   6  -2 -12   16.26    5.04
   6   2 -12   25.08    5.41
   6   2 -12   17.41    3.19
   6   2 -12   17.60    3.25
   6   2 -12   15.38    2.68
   6  -2 -12   17.69    4.78
   6   2 -12   18.65    4.62
  -2   0 -11    1.03    3.79
  -2   0 -11    2.27    4.89
  -2   0 -11   -1.77    4.52
   2   0  11    2.91    4.49
  -5  -5  -6  184.45    8.55
   5   5   6  194.54    9.37
  -5   5  -6  192.24    8.96
   5   5   6  185.35    9.20
  -5   5  -6  160.77    8.02
  -5  -5  -6  182.41    9.06
  -5  -5  -6  193.39   10.32
   5  -5   6  142.31   11.29
   5  -5   6  180.52    7.95
  -5   5  -6  198.28   10.69
   5  -5   6  181.44    7.99
   5  -5   6  175.24    9.24
   5  -5   6  203.36    9.39
   5   5   6  179.51    8.29
  14  -2  -9 4741.64  168.69
 -14  -2   9 4499.60  168.03
  14  -2  -9 4703.51  168.39
  14   2  -9 3839.19  168.55
  14   2  -9 4482.10  167.78
  14   2  -9 4564.28  168.40
  14   2  -9 4390.32  167.94
  14   2  -9 4102.06  167.22
  14  -2  -9 4751.48  167.82
 -14  -2   9 4402.73  168.08
 -14  -2   9 4295.11  168.78
  14  -2  -9 4301.10  167.37
 -14   2   9 4358.90  168.40
  12  -4   1  546.81   23.19
  12   4   1  544.04   22.21
 -12  -4  -1  530.29   22.71
 -12   4  -1  526.46   22.65
  12  -4   1  513.06   22.56
  12  -4   1  528.96   21.83
 -12   4  -1  520.06   22.85
  12   4   1  514.11   22.01
  12   4   1  538.62   22.31
  12   4   1  529.99   21.92
  12   4   1  524.12   22.36
 -12  -4  -1  541.24   22.21
  12  -4   1  529.18   22.15
 -12  -4  -1  533.42   22.28
 -12   4  -1  561.02   22.35
 -12  -4  -1  558.84   22.40
  12  -4   1  528.68   22.05
 -12   4  -1  551.90   22.48
 -12   4  -1  569.35   22.37
 -12  -4  -1  531.46   22.77
   8   6   0  227.59   11.06
  -8   6   0  234.57   11.16
   8   6   0  251.00   11.81
  -8   6   0  249.20   11.64
  -8   6   0  265.76   11.29
  -8   6   0  247.69   11.56
   8  -6   0  234.44   11.86
   8  -6   0  236.67   12.10
   8  -6   0  230.83   11.09
  -8  -6   0  233.81   11.27
   8   6   0  227.96   11.26
   8   6   0  248.24   11.52
  -8  -6   0  230.02   11.80
  -8  -6   0  250.76   11.53
  -8   6   0  247.16   11.78
   8  -6   0  234.07   10.99
  -8  -6   0  224.89   11.06
  -8  -6   0  244.86   11.50
 -14   0  1011634.70  433.61
  14   0 -1011435.10  432.90
  14   0 -1011151.10  433.21
  14   0 -1011233.80  433.20
 -16   0   7   -2.41    4.57
  16   0  -7    1.76    4.00
  16   0  -7   -0.34    4.07
 -16   0   7   -0.52    1.96
  16   0  -7    2.27    3.71
   8   4 -10  330.64   13.28
   8   4 -10  254.09   11.15
  -8  -4  10  266.64   13.91
   8  -4 -10  286.92   11.97
   8  -4 -10  345.02   12.97
   8   4 -10  362.54   12.73
   8  -4 -10  338.37   13.08
  -8   4  10  345.05   11.95
  -8   4  10  367.89   13.76
   8  -4 -10  338.12   12.04
  -1   7  -1   29.33    4.57
  -1  -7  -1   21.99    4.97
   1  -7   1   33.55    4.60
  -1  -7  -1   14.44    5.30
  -1   7  -1   20.34    4.20
   1   7   1   25.08    4.31
   1   7   1   21.82    4.21
   1  -7   1   29.05    5.27
   1  -7   1   16.47    5.16
 -16   0   2  433.14   18.36
  16   0  -2  429.82   18.14
 -16   0   2  412.21   18.50
 -16   0   2  411.25   17.30
 -11   3  -4 1334.48   50.77
  11   3   4 1280.26   50.63
 -11   3  -4 1288.07   51.52
 -11   3  -4 1367.06   51.80
  11   3   4 1307.36   50.70
 -11  -3  -4 1247.23   51.52
 -11  -3  -4 1248.11   50.74
 -11   3  -4 1287.37   51.69
  11   3   4 1213.52   50.17
  11  -3   4 1306.25   51.38
  11  -3   4 1340.47   50.76
 -11  -3  -4 1343.13   51.42
  11  -3   4 1298.83   50.51
  11   3   4 1316.57   51.42
  11  -3   4 1331.27   50.17
  -4  -2  12   12.24    3.50
   4   2 -12    4.25    5.21
   4   2 -12   14.30    2.73
   4   2 -12   11.71    2.40
   4  -2 -12   11.91    2.66
   4   2 -12    9.42    3.64
   4   2 -12    9.11    4.29
   4  -2 -12   13.71    5.27
   4  -2 -12   10.00    3.69
   4   2 -12   10.45    6.09
   4   2 -12   14.49    3.80
   4  -2 -12    7.32    2.81
  -4   2  12    9.82    3.77
   4  -2 -12   -1.19    5.37
   4  -2 -12    7.25    3.57
   4  -2 -12   10.34    4.76
   2  -4   9   38.37    4.51
   2   4   9   39.85    4.88
  -2  -4  -9   39.59    3.98
  -2   4  -9   38.28    4.52
  -2  -4  -9   40.69    2.95
   2  -4   9   43.25    4.54
   2   4   9   42.48    4.39
  -2  -4  -9   31.30    4.54
  -2   4  -9   40.90    3.96
  -2   4  -9   28.33    1.62
   9   3 -11    1.48    4.34
  -9   3  11    8.15    4.17
   9  -3 -11   10.36    3.73
   9  -3 -11    5.23    1.32
  -9   3  11    8.78    3.14
   9  -3 -11    4.69    3.94
   9  -3 -11    4.31    3.19
   9  -3 -11    2.31    1.59
   9   3 -11   12.31    4.57
   9  -3 -11    7.15    4.59
  -9  -3  11    5.24    5.42
   9   3 -11    9.17    3.56
   9   3 -11    5.35    2.28
   1  -5   8  131.96    7.30
  -1   5  -8  113.89    6.75
   1  -5   8  121.88    6.75
  -1  -5  -8  119.02    6.21
  -1   5  -8  109.90    5.62
   1   5   8  119.67    6.57
   1   5   8  122.91    7.13
  -1   5  -8  120.71    8.99
  -1  -5  -8  114.55    7.20
  -1  -5  -8  121.57    6.13
  -6   4  -7   43.84    3.52
   6  -4   7   27.41    7.45
   6   4   7   39.84    4.46
   6   4   7   40.35    2.89
   6   4   7   37.98    5.47
   6   4   7   27.95    5.23
  -6  -4  -7   32.14    4.53
  -6   4  -7   42.64    6.22
   6  -4   7   43.58    3.73
   6  -4   7   30.83    5.04
  -6  -4  -7   35.33    6.38
  -6   4  -7   37.92    3.93
  -6  -4  -7   43.71    2.85
   6  -4   7   41.64    4.57
   8   0   8 2739.14  107.59
  -8   0  -8 2797.79  107.05
  -8   0  -8 2751.48  106.85
  -8   0  -8 2823.91  107.83
   8   0   8 2773.14  105.95
  -1  -7   2  285.01   11.76
   1   7  -2  279.93   11.24
   1   7  -2  277.38   10.85
  -1   7   2  279.30   11.06
  -1   7   2  262.87   11.07
  -1  -7   2  231.38   11.77
 -12   4   8  415.54   15.89
 -12   4   8  383.83   15.81
 -12  -4   8  383.93   15.27
  12   4  -8  367.17   15.11
  12   4  -8  368.53   15.91
  12  -4  -8  320.59   14.40
  12  -4  -8  366.13   15.53
  12   4  -8  376.64   14.78
  12  -4  -8  368.82   15.74
 -12  -4   8  396.15   16.34
  11  -5  -6  332.69   13.68
 -11   5   6  342.32   15.09
 -11  -5   6  336.22   15.20
 -11  -5   6  325.71   14.02
  11   5  -6  344.31   14.01
  11   5  -6  328.60   14.97
  11  -5  -6  296.50   14.83
  11  -5  -6  342.89   14.75
  11   5  -6  326.14   14.02
 -11  -5   6  338.71   14.21
 -11   5   6  354.06   14.79
 -11   5   6  354.90   14.66
 -11   5   6  315.89   13.10
   8   2 -12    9.08    2.47
   8   2 -12   15.67    4.70
   8  -2 -12   13.03    3.23
   8   2 -12   16.81    4.73
   8  -2 -12   13.16    4.65
   8   2 -12   14.80    3.26
   8  -2 -12   16.83    3.46
   8   2 -12    9.17    4.24
   8   2 -12   14.97    2.91
   8  -2 -12   11.38    4.16
   8  -2 -12   13.60    4.31
   8  -2 -12   11.48    4.62
  -8  -2  12    0.85    5.73
 -12   2  -4  585.44   23.65
  12  -2   4  550.71   21.87
  12  -2   4  557.24   22.44
 -12  -2  -4  536.05   23.06
  12   2   4  523.02   21.59
  12  -2   4  537.56   21.66
 -12   2  -4  540.58   22.40
 -12  -2  -4  541.09   22.42
 -12   2  -4  549.14   23.01
  12  -2   4  464.07   22.76
  12   2   4  529.04   22.63
  12   2   4  568.93   22.11
 -12   2  -4  545.58   23.31
  12   2   4  563.21   22.45
  12   2   4  568.77   23.07
   8  -6  -5  598.66   23.28
   8  -6  -5  633.30   24.10
   8   6  -5  587.36   23.41
  -8   6   5  602.88   24.03
  -8  -6   5  643.18   23.85
  -8   6   5  511.20   22.15
  -8  -6   5  616.43   22.89
  -8   6   5  579.49   23.39
  -8  -6   5  577.00   24.30
   8   6  -5  611.32   23.65
  -8  -6   5  555.57   22.27
   8   6  -5  587.82   23.95
   9   3   6 2619.16  106.89
  -9   3  -6 2818.59  107.07
   9  -3   6 2820.70  105.98
   9   3   6 2676.57  107.00
  -9  -3  -6 2872.53  106.87
   9   3   6 2656.11  105.37
   9  -3   6 2865.17  106.16
   9  -3   6 2787.91  106.90
   9  -3   6 2718.19  105.31
  -9   3  -6 2852.60  107.46
   9   3   6 2715.43  106.15
  -9  -3  -6 2909.66  107.45
  -9   3  -6 2839.31  106.16
  -9  -3  -6 2830.38  106.04
  -3   7   1   36.73    4.42
  -3  -7   1   33.88    5.40
   3  -7  -1   36.09    5.72
   3   7  -1   31.43    4.62
  -3  -7   1   22.54    5.31
   3   7  -1   39.69    4.58
   3   7  -1   38.52    4.81
  -3  -7   1   32.51    4.52
  -3   7   1   31.81    5.45
  -3  -7   1   36.20    4.60
  -3   7   1   37.44    4.92
   5   5  -9   34.60    3.83
  -5  -5   9   27.29    2.09
   5  -5  -9   24.31    4.28
  -5   5   9   33.88    4.87
   5  -5  -9   34.48    4.25
  -5   5   9   25.55    1.60
   5   5  -9   36.45    5.07
   5   5  -9   39.01    4.54
   5  -5  -9   34.14    5.13
  -5  -5   9   26.87    6.28
  -6   6  -3  383.19   17.57
   6  -6   3  403.34   16.93
  -6  -6  -3  357.51   17.42
  -6   6  -3  411.68   16.91
   6  -6   3  384.76   16.25
   6  -6   3  450.28   18.49
  -6   6  -3  403.48   16.39
  -6  -6  -3  386.05   16.67
  -6  -6  -3  380.90   16.98
  -6   6  -3  414.83   17.07
   6   6   3  367.65   16.39
   6   6   3  378.29   16.63
   6   6   3  392.66   16.96
  -6  -6  -3  391.71   17.37
   6   6   3  383.59   16.02
   6  -6   3  388.98   16.09
 -13  -3   9  162.44    9.69
  13  -3  -9  192.13    8.02
  13   3  -9  169.84    7.20
 -13  -3   9  186.58    8.60
  13  -3  -9  187.55    9.32
  13   3  -9  159.13    8.37
 -13  -3   9  171.01    9.41
 -13   3   9  187.26    9.14
  13   3  -9  194.01    9.01
  13   3  -9  184.35   10.02
  13  -3  -9  173.77    8.32
 -13   3   9  193.44    8.86
  13  -3  -9  184.91    9.61
 -15   3   4  570.43   25.05
 -15   3   4  593.00   23.39
  15  -3  -4  622.08   24.87
  15   3  -4  617.35   24.20
 -15  -3   4  613.16   24.67
  15   3  -4  595.32   25.01
  15   3  -4  589.75   24.73
  15  -3  -4  618.74   25.11
  15  -3  -4  608.34   24.94
 -15  -3   4  602.33   24.04
 -15  -3   4  584.63   25.16
 -15  -3   4  590.02   23.58
 -15   3   4  595.88   24.53
 -15   3   4  626.94   24.20
   9   5  -8  245.92   10.66
  -9   5   8  245.45   10.50
   9  -5  -8  219.48   11.21
  -9   5   8  241.86   11.61
   9  -5  -8  247.82   10.35
  -9   5   8  244.63   11.75
  -9  -5   8  218.08    9.83
   9   5  -8  220.40   11.51
  -9  -5   8  256.36   12.33
  -3   7   0  792.55   34.99
  -3  -7   0  879.25   35.72
   3   7   0  827.81   34.54
  -3  -7   0  878.07   34.67
   3  -7   0  871.86   35.38
  -3  -7   0  877.45   34.64
  -3   7   0  917.49   35.04
  -3  -7   0  879.16   35.35
   3   7   0  867.03   35.03
   3   7   0  865.62   34.60
  -3   7   0  918.74   35.01
   3   7   0  904.14   35.11
  10   2   6   52.16    4.31
  10   2   6   42.48    2.62
  10  -2   6   46.02    3.92
  10  -2   6   50.71    2.90
 -10   2  -6   53.64    5.59
  10  -2   6   44.42    5.55
 -10   2  -6   39.91    4.79
 -10   2  -6   48.39    6.31
  10   2   6   42.51    5.53
  10  -2   6   50.92    4.83
 -10  -2  -6   45.85    5.62
 -10  -2  -6   45.46    4.36
   3   5  -9  662.07   26.24
   3  -5  -9  612.18   25.63
  -3  -5   9  664.22   26.53
  -3   5   9  625.25   26.44
  -3  -5   9  626.40   25.31
   3   5  -9  667.28   25.52
   3   5  -9  675.84   26.42
  -3  -5   9  637.81   27.75
   3  -5  -9  617.55   26.58
  11  -5   0  307.67   13.36
 -11   5   0  323.70   13.94
 -11  -5   0  319.61   14.23
  11   5   0  317.19   13.58
 -11  -5   0  285.91   13.69
 -11  -5   0  293.33   13.59
  11   5   0  288.19   13.71
  11   5   0  300.09   13.37
  11   5   0  290.91   13.50
 -11  -5   0  291.59   13.35
  11  -5   0  299.72   14.01
 -11   5   0  294.99   13.40
  11  -5   0  306.81   13.48
 -11   5   0  297.33   14.14
 -11   5   0  303.75   13.53
  11  -5   0  346.12   14.57
  15   3  -5  675.69   26.50
 -15   3   5  675.71   27.62
  15  -3  -5  663.91   27.55
 -15  -3   5  660.38   27.11
 -15  -3   5  705.24   27.14
 -15  -3   5  634.12   25.88
  15   3  -5  656.63   27.14
  15  -3  -5  668.51   27.10
  15  -3  -5  691.05   27.47
  15   3  -5  650.12   27.60
 -15  -3   5  645.85   27.80
 -15   3   5  693.46   26.96
 -15   3   5  696.61   26.59
 -15  -1   9   18.67    3.57
 -15  -1   9   21.97    5.18
  15   1  -9   21.55    4.82
 -15  -1   9   25.25    5.05
  15  -1  -9   23.30    3.84
  15   1  -9   11.48    4.35
  15   1  -9   19.01    3.33
  15  -1  -9   17.54    4.73
 -15   1   9   21.01    4.17
   1   7   2  308.30   13.65
   1  -7   2  317.43   15.11
   1  -7   2  321.66   15.06
   1  -7   2  329.21   14.17
   1   7   2  329.61   13.72
  -1   7  -2  320.61   14.16
  -1  -7  -2  328.03   14.50
  -1  -7  -2  329.89   14.81
  -1  -7  -2  325.33   14.77
   1   7   2  317.37   14.18
   1   7   2  307.84   14.48
   1  -3 -11  170.39    8.01
   1  -3 -11  174.94    6.98
  -1   3  11  168.01    8.16
   1  -3 -11  180.63    8.07
   1   3 -11  188.34   10.71
  -1  -3  11  173.36    8.28
   1   3 -11  177.42    7.95
   1  -3 -11  155.84   10.03
   1   3 -11  149.86    6.39
   1   3 -11  168.97    8.08
  -3  -7   2  901.39   37.25
  -3   7   2  910.64   36.71
   3   7  -2  922.07   36.61
  -3   7   2  951.46   36.85
  -3  -7   2  926.32   37.05
   3   7  -2  867.17   36.51
   3  -7  -2  890.36   37.02
  -3  -7   2  936.09   36.05
   3   7  -2  943.41   36.80
  -3   7   2  905.08   36.77
   9  -5   3  174.72    8.39
   9  -5   3  158.24    9.19
  -9   5  -3  173.58    8.45
  -9   5  -3  181.31    9.41
   9   5   3  170.72    8.88
   9   5   3  176.81    8.42
  -9  -5  -3  185.29    8.59
  -9  -5  -3  161.42    9.81
   9   5   3  183.00    9.60
  -9   5  -3  185.50   10.03
  -9  -5  -3  163.71    9.39
   9   5   3  172.07    9.34
   9  -5   3  173.56    8.20
  -9  -5  -3  169.27    9.42
   9   5   3  164.28    8.23
   9  -5   3  171.29    8.87
  -9   5  -3  181.21    9.84
   9  -5   3  163.69   10.85
  15  -3  -3   61.10    6.02
 -15  -3   3   71.50    5.17
  15   3  -3   63.85    5.92
 -15  -3   3   73.55    5.82
 -15  -3   3   67.08    6.12
  15  -3  -3   68.06    6.54
 -15   3   3   71.92    4.51
 -15  -3   3   65.17    4.41
 -15   3   3   61.63    6.14
 -15   3   3   74.44    5.20
  15  -3  -3   77.95    6.06
 -15   3   3   76.40    5.58
  15   3  -3   74.91    5.97
  15   3  -3   68.82    5.15
   1  -1 -12  337.57   13.15
   1   1 -12  322.56   13.52
  -1   1  12  350.13   15.15
   1  -1 -12  266.43   16.01
  -1   1  12  342.95   13.83
  -1  -1  12  335.41   14.79
   1  -1 -12  302.67   13.04
   1   1 -12  355.81   14.72
   1   1 -12  329.16   13.00
   1  -1 -12  355.30   13.60
   1  -1 -12  350.06   15.09
   1  -1 -12  336.01   13.77
   1   1 -12  341.61   13.82
   1   1 -12  378.61   16.15
 -10  -4  -4  123.14    7.91
  10  -4   4  115.32    6.91
  10   4   4  124.78    6.10
  10   4   4  114.50    6.64
  10   4   4  118.95    7.71
  10  -4   4  122.92    6.06
 -10  -4  -4  119.19    7.50
 -10   4  -4  114.59    8.23
  10  -4   4  110.47    6.70
 -10   4  -4  124.88    8.06
 -10  -4  -4  130.19    6.68
  10  -4   4  114.44    7.62
  10   4   4  122.43    7.19
 -10   4  -4  125.04    6.74
  -4  -6   7  972.90   36.97
   4   6  -7  980.68   37.67
  -4  -6   7  890.93   38.82
  -4   6   7  913.52   36.85
  -4   6   7  984.37   38.42
   4  -6  -7  899.42   37.74
   4   6  -7  992.28   38.22
   4  -6  -7  939.64   38.23
   4   6  -7 1014.13   38.13
   4  -6  -7  986.28   37.82
 -16   2   5 1494.31   59.27
  16   2  -5 1653.46   60.26
 -16   2   5 1734.79   60.75
  16   2  -5 1612.67   60.73
  16  -2  -5 1680.22   60.93
 -16  -2   5 1427.76   59.18
 -16   2   5 1712.04   59.89
 -16  -2   5 1515.87   60.96
  16  -2  -5 1702.38   60.86
 -16  -2   5 1782.66   60.49
 -16   2   5 1661.59   61.33
 -16   2   4   89.45    5.12
 -16  -2   4   60.58    5.99
 -16  -2   4   75.64    5.56
 -16  -2   4   71.81    3.99
  16   2  -4   82.48    5.60
 -16   2   4   80.40    5.92
 -16   2   4   77.43    4.42
  16  -2  -4   77.62    6.54
  16  -2  -4   78.08    6.53
 -16   2   4   77.91    6.40
  16  -2  -4   85.42    6.37
  16   2  -4   85.35    5.92
   8   6   1 2519.97   86.80
  -8  -6  -1 2340.04   87.05
   8  -6   1 2228.27   86.68
  -8  -6  -1 2018.84   87.44
  -8  -6  -1 2401.85   86.92
   8   6   1 2272.78   87.02
  -8   6  -1 2452.08   87.62
  -8   6  -1 2435.90   87.35
   8   6   1 2432.22   87.49
  -8   6  -1 2514.43   87.57
   8  -6   1 2667.16   88.23
   8  -6   1 2463.05   87.38
   8  -6   1 2353.52   87.71
   8   6   1 2350.85   86.98
  -8  -6  -1 2316.57   87.27
  -8   6  -1 2447.91   86.95
   8   6   1 2400.65   87.33
   8  -6   1 2384.45   86.73
  -7  -5  -5  703.30   29.48
  -7   5  -5  689.34   28.64
   7   5   5  690.76   28.76
  -7  -5  -5  700.72   28.29
  -7  -5  -5  742.74   29.00
  -7   5  -5  738.42   28.09
   7   5   5  679.41   28.08
   7   5   5  703.16   29.17
   7   5   5  704.63   27.85
   7  -5   5  737.40   28.13
   7  -5   5  711.39   27.86
   7  -5   5  592.99   30.37
   7   5   5  712.74   28.91
   7  -5   5  746.35   28.73
   7  -5   5  724.26   29.08
  -7   5  -5  728.83   29.83
   2   6  -7 1923.36   64.27
   2   6  -7 1963.81   64.92
  -2   6   7 1860.99   64.55
   2  -6  -7 1942.89   64.42
  -2   6   7 2013.57   65.17
  -2  -6   7 1996.28   64.06
   2  -6  -7 1898.09   64.91
   2  -6  -7 1783.75   65.03
  -1  -7   3   51.60    6.37
  -1   7   3   55.77    5.72
   1   7  -3   64.76    5.16
  -1   7   3   52.21    5.10
  -1  -7   3   60.38    6.50
   1  -7  -3   67.66    6.09
  -1   7   3   62.60    4.35
 -15  -3   6   11.35    1.39
  15  -3  -6   16.48    4.45
 -15  -3   6   14.94    4.97
 -15  -3   6   17.15    4.57
 -15   3   6   20.00    3.70
  15   3  -6   15.82    3.13
 -15  -3   6   17.71    4.49
  15   3  -6   14.08    4.31
 -15   3   6   15.62    3.63
 -15   3   6   13.39    4.79
  15   3  -6   12.14    5.10
  12   2 -11 1148.70   41.59
  12   2 -11 1310.31   41.72
  12   2 -11 1272.84   43.59
  12  -2 -11 1255.58   41.95
 -12  -2  11 1105.21   43.24
  12   2 -11 1177.44   42.23
  12  -2 -11 1284.99   42.23
  12   2 -11 1074.88   42.28
  12  -2 -11 1292.41   42.81
  12  -2 -11 1200.89   43.07
 -12   2  11 1261.27   42.87
   3  -7   1   32.53    5.66
  -3  -7  -1   41.05    5.64
   3  -7   1   39.74    5.21
   3   7   1   36.27    4.62
   3   7   1   36.71    4.41
   3   7   1   42.37    5.31
   3   7   1   36.28    4.81
  -3   7  -1   45.70    4.68
  -3  -7  -1   30.48    5.20
  -3  -7  -1   42.73    4.99
  16   0  -8 2026.81   60.95
  16   0  -8 1997.03   61.07
  16   0  -8 2119.96   61.57
 -16   0   1   -2.42    4.80
  16   0  -1   -1.30    4.55
  16   0  -1   -0.84    4.55
 -16   0   1  -14.81    4.61
  13   1 -11   86.80    3.41
  13  -1 -11  108.82    4.27
 -13  -1  11  100.10    6.10
  13   1 -11  109.10    5.81
  13  -1 -11   38.20    3.38
 -13   1  11  108.69    6.26
  13  -1 -11  104.45    6.46
 -13  -1  11   86.08    6.66
  13   1 -11   80.86    4.83
  13   1 -11  100.36    4.69
  13  -1 -11   96.85    5.15
  13   1 -11  105.08    6.34
  13  -1 -11  103.77    6.52
  13   3   2   98.88    6.49
  13   3   2   95.66    5.81
 -13   3  -2  102.69    7.32
 -13  -3  -2   97.40    6.74
  13  -3   2   99.58    6.20
  13   3   2   99.62    6.86
 -13   3  -2  107.13    7.61
 -13  -3  -2   87.60    6.72
 -13   3  -2   92.43    6.98
  13  -3   2   98.96    6.50
 -13   3  -2  101.63    6.71
 -13  -3  -2   95.43    6.95
 -13  -3  -2  102.94    6.64
  13  -3   2   94.30    5.77
  -7   5   9  276.58   12.69
  -7   5   9  250.82   12.88
   7  -5  -9  260.66   12.18
   7  -5  -9  245.87   11.45
   7   5  -9  258.92   12.46
  -7   5   9  272.18   10.94
  -7  -5   9  259.13   13.46
   7   5  -9  273.19   12.08
   7  -5  -9  272.82   12.05
   7   5  -9  264.14   11.84
  -4   2 -10  170.89    7.50
   4  -2  10  187.28    9.54
  -4   2 -10  174.82    8.06
   4  -2  10  170.82    7.77
   4   2  10  185.06    9.91
   4   2  10  161.96    7.85
  -4  -2 -10  178.00    7.75
   4   2  10  171.42   10.10
  -4   2 -10  176.09    9.24
  -4   2 -10  174.27   10.24
  -4  -2 -10  162.38    9.35
 -16  -2   6   50.74    4.64
 -16   2   6   52.19    5.06
  16   2  -6   51.28    4.32
  16  -2  -6   62.81    5.57
  16  -2  -6   62.79    5.63
  16   2  -6   56.03    5.40
 -16   2   6   41.68    5.85
 -16   2   6   58.07    3.86
  16  -2  -3  511.71   21.09
  16   2  -3  496.05   20.78
 -16   2   3  486.46   20.67
 -16  -2   3  486.76   20.11
 -16  -2   3  453.42   20.84
 -16  -2   3  477.93   20.34
  16   2  -3  456.95   20.21
 -16  -2   3  480.20   19.58
 -16   2   3  437.11   20.87
 -16   2   3  491.59   19.84
 -16   2   3  566.79   20.08
 -16  -2   3  490.63   21.05
  16  -2  -3  496.22   20.74
  16  -2  -3  482.83   20.76
  12   0   5    0.42    2.62
 -12   0  -5    2.10    4.41
  12   0   5    6.02    4.43
  14  -4  -4 1190.37   47.12
 -14   4   4 1207.65   46.51
 -14   4   4 1140.69   46.41
 -14   4   4 1205.45   47.21
  14  -4  -4 1216.23   46.82
 -14   4   4 1166.58   45.70
 -14  -4   4 1236.05   46.07
  14   4  -4 1201.41   46.17
 -14  -4   4 1202.53   46.74
  14   4  -4 1225.66   46.80
 -14  -4   4 1169.46   47.37
 -14  -4   4 1156.95   46.04
  14   4  -4 1227.73   47.22
 -14  -4   4 1152.87   46.90
  14  -4  -4 1108.84   47.03
  -3  -7   3   44.03    5.78
  -3  -7   3   30.87    3.90
   3  -7  -3   13.71    4.95
   3   7  -3   30.99    4.89
  -3   7   3   30.94    4.68
  -3   7   3   39.69    4.89
  -3  -7   3   26.34    5.81
   3   7  -3   35.56    4.59
  11   1 -12   71.46    5.19
  11   1 -12   81.46    4.77
  11  -1 -12   78.85    5.22
  11  -1 -12   68.24    4.54
  11  -1 -12   76.03    5.71
  11  -1 -12   70.68    4.74
  11   1 -12   69.12    5.10
 -11   1  12   80.79    6.03
 -11  -1  12   76.41    6.68
  11  -1 -12   67.09    5.65
  11   1 -12   81.97    6.53
  11   1 -12   62.69    5.47
  11   1 -12   79.90    6.37
  11  -1 -12   65.01    5.54
  -6   2  -9  140.75    7.21
   6   2   9  146.32    9.31
   6   2   9  133.32    8.53
  -6   2  -9  139.38    9.11
   6  -2   9  146.00    6.54
   6   2   9  138.83    6.88
   6  -2   9  157.99    8.54
  -6  -2  -9  135.27    8.26
  -6  -2  -9  135.05    6.79
  -2   6  -6   22.03    4.46
  -2  -6  -6   21.59    4.19
   2  -6   6   34.33    6.71
  -2   6  -6   36.70    3.53
   2  -6   6   28.56    4.42
  -2   6  -6   28.48    6.43
   2   6   6   22.90    3.79
  -2  -6  -6   25.94    5.39
   2  -6   6   28.17    2.15
  -2  -6  -6   26.02    5.31
   2   6   6   24.30    4.12
   2   6   6   21.26    4.58
   2   2 -12   98.28    5.18
  -2   2  12   87.63    5.60
   2   2 -12   94.98    7.92
   2  -2 -12   84.59    7.73
   2   2 -12   83.27    4.39
   2  -2 -12   70.18    4.02
  -2  -2  12   93.30    5.94
   2   2 -12   85.20    5.93
   2  -2 -12   78.01    5.73
   2  -2 -12   75.11    4.09
   2  -2 -12   93.24    5.31
   2   2 -12   87.69    3.94
   0  -4  10  470.20   19.34
   0   4 -10  485.36   19.14
   0  -4  10  522.72   21.90
   0  -4 -10  469.41   19.21
   0   4 -10  438.18   17.95
   0   4  10  472.18   19.27
   0  -4 -10  470.59   18.79
   0  -4 -10  461.58   18.39
   0   4  10  446.36   19.32
   0  -4  10  481.32   19.30
   0   4 -10  462.13   18.96
   0  -4 -10  499.63   20.59
  15  -3  -2 1312.64   49.56
 -15   3   2 1251.37   49.17
 -15   3   2 1171.89   49.45
  15   3  -2 1249.72   49.19
 -15  -3   2 1295.62   49.31
  15   3  -2 1218.04   49.25
 -15   3   2 1254.36   48.75
  15  -3  -2 1232.20   49.01
  15  -3  -2 1244.59   49.21
 -15  -3   2 1138.29   49.13
 -15   3   2 1283.21   48.57
 -15  -3   2 1226.03   48.51
 -15  -3   2 1299.80   48.78
  15   3  -2 1231.67   48.89
  15  -3  -2 1258.47   49.45
   0   0 -12   15.87    2.10
   0   0 -12   20.78    5.60
   0   0 -12   17.41    1.64
   0   0 -12   13.85    5.12
   0   0 -12   21.83    4.27
   0   0  12   20.74    4.62
   4  -6   5   71.65    4.75
   4  -6   5   58.56    3.97
  -4   6  -5   65.40    7.07
  -4  -6  -5   64.13    6.50
  -4  -6  -5   53.55    5.21
  -4   6  -5   62.75    4.44
  -4   6  -5   68.71    5.39
  -4  -6  -5   68.90    6.24
   4   6   5   67.17    3.70
   4   6   5   59.56    5.30
   4   6   5   61.65    4.88
   4  -6   5   72.43    5.62
   4  -6   5   66.59    8.00
   4   6   5   68.85    5.44
  14   4  -3 1660.97   64.00
 -14   4   3 1647.61   63.72
 -14  -4   3 1659.96   64.50
 -14  -4   3 1558.07   63.28
 -14  -4   3 1646.63   63.35
  14   4  -3 1667.99   63.53
  14   4  -3 1669.13   64.27
 -14   4   3 1618.70   63.07
 -14   4   3 1613.22   64.32
 -14   4   3 1661.61   63.76
 -14  -4   3 1643.23   64.17
  14  -4  -3 1645.21   64.10
  14  -4  -3 1643.91   64.32
  14  -4  -3 1660.98   64.23
 -15   1  -1  222.45   10.97
  15   1   1  207.39   10.78
  15  -1   1  223.57   10.68
 -15  -1  -1  209.60   11.15
 -15  -1  -1  208.78   10.78
  15  -1   1  211.74   11.02
 -15   1  -1  216.82   11.06
  15  -1   1  207.69   10.26
 -15   1  -1  236.63   11.80
  15   1   1  207.19   10.69
  -8   4  -6    0.58    3.55
   8   4   6    3.37    3.59
  -8   4  -6    0.15    3.36
   8  -4   6    0.06    1.94
  -8  -4  -6   -4.45    5.45
   8   4   6   -1.43    4.68
   8   4   6   -1.06    5.16
  -8  -4  -6   -1.49    3.01
   8  -4   6   -1.77    4.35
  -8   4  -6   -2.41    5.24
   8   4   6    1.28    2.33
   8   4   6    1.45    3.28
  -8  -4  -6   -1.87    4.30
   8  -4   6   -1.14    3.81
   8  -4   6    1.23    3.29
 -14  -4   5    9.96    2.87
 -14  -4   5    9.85    4.76
 -14  -4   5    6.67    4.59
  14   4  -5    5.23    4.31
  14   4  -5    9.94    4.71
  14  -4  -5    8.65    4.41
 -14   4   5    9.95    3.41
 -14   4   5   14.54    4.14
  14  -4  -5    9.60    4.50
 -14   4   5   12.90    4.81
  14  -4  -5    3.22    4.78
 -14  -4   5    6.96    5.14
  14   4  -5    3.95    2.91
 -14  -4   5    6.53    2.97
   1  -5  -9  337.30   14.75
   1   5  -9  365.43   14.47
  -1  -5   9  357.88   14.95
  -1  -5   9  332.17   17.37
   1   5  -9  365.16   15.51
  -1  -5   9  345.00   15.66
  -1   5   9  370.97   14.69
  -1   5   9  359.02   15.61
   1  -5  -9  338.83   16.21
  -6  -6   7  127.06    6.08
   6  -6  -7  174.51    8.93
  -6   6   7  185.87    7.24
   6   6  -7  187.31    8.50
  -6  -6   7  135.11    6.10
   6   6  -7  194.05    8.84
  -6  -6   7  170.02    9.95
  -6  -6   7  186.46    9.11
  -6   6   7  194.08    9.17
   6  -6  -7  186.66    8.12
   6   6  -7  170.71    8.18
  -8  -6   6   43.25    5.07
  -8  -6   6   23.20    1.49
  -8  -6   6   44.31    3.70
  -8  -6   6   41.89    6.01
   8  -6  -6   51.93    5.78
   8   6  -6   53.89    5.03
   8  -6  -6   37.95    4.21
  -8   6   6   40.32    4.16
   8   6  -6   42.02    4.57
 -11   5   7  661.76   25.87
 -11  -5   7  658.58   26.40
  11   5  -7  628.51   25.00
 -11  -5   7  612.57   25.34
 -11   5   7  661.86   25.68
  11   5  -7  619.55   25.08
  11  -5  -7  587.75   24.66
  11  -5  -7  675.71   25.87
 -11  -5   7  639.74   25.09
  11  -5  -7  606.63   26.10
   1   7   3   46.16    4.19
   1   7   3   47.60    4.26
   1  -7   3   46.42    5.24
  -1  -7  -3   46.58    5.69
   1  -7   3   41.54    6.27
   1   7   3   43.92    4.85
   1  -7   3   50.83    6.04
  -1   7  -3   38.85    4.80
  -1  -7  -3   38.59    5.91
  -1  -7  -3   32.97    5.31
  -1   7  -3   39.98    5.30
  -5   1 -10  673.82   28.48
  -5  -1 -10  692.73   27.08
  -5  -1 -10  624.75   27.39
  -5   1 -10  705.55   27.07
   5  -1  10  689.18   28.05
   5   1  10  681.69   26.46
   5   1  10  645.34   28.16
  -5  -1 -10  677.59   28.15
   5  -3   9  325.16   14.18
  -5  -3  -9  322.47   13.97
   5  -3   9  307.04   13.13
  -5   3  -9  322.86   13.93
  -5   3  -9  326.88   12.90
  -5  -3  -9  292.81   12.38
  -5   3  -9  315.88   12.90
   5   3   9  304.02   13.29
  -5  -3  -9  269.16   14.95
   5   3   9  295.18   14.39
 -14   2  -2  220.40   11.07
  14  -2   2  217.82   10.46
  14   2   2  200.52    9.92
  14   2   2  216.51   10.90
 -14   2  -2  238.68   11.66
  14   2   2  210.00   10.63
  14  -2   2  203.52    9.92
 -14  -2  -2  203.71   10.58
  14  -2   2  208.20    9.98
 -14   2  -2  222.95   11.20
 -14   2  -2  221.15   11.29
 -14  -2  -2  215.40   10.91
  12  -4   2   29.23    4.12
  12  -4   2   25.62    5.09
 -12   4  -2   30.86    5.58
  12   4   2   27.09    4.16
 -12   4  -2   28.13    5.40
  12  -4   2   26.88    4.52
 -12  -4  -2   30.29    4.68
  12   4   2   28.76    4.98
  12   4   2   26.88    4.56
  12  -4   2   32.20    4.71
  12   4   2   30.14    4.75
 -12  -4  -2   28.87    5.34
 -12   4  -2   32.75    5.05
 -12  -4  -2   30.97    5.36
 -12  -4  -2   36.68    5.32
  10  -2 -12   41.62    5.14
  10   2 -12   29.35    3.83
  10  -2 -12   44.09    4.33
 -10  -2  12   27.94    6.34
  10   2 -12   23.84    4.73
  10  -2 -12   28.71    4.97
  10   2 -12   31.21    2.98
  10   2 -12   28.62    3.26
  10   2 -12   26.18    5.27
 -10   2  12   30.29    4.07
  10  -2 -12   39.38    4.32
  10  -2 -12   22.50    4.15
   6   0 -13   -5.05    4.97
   6   0 -13    0.99    3.67
   6   0 -13    5.11    3.66
   6   0 -13    0.17    4.29
   6   0 -13   -4.05    5.61
   6   0 -13    2.77    3.29
 -10  -4  10    6.08    5.14
  10   4 -10   12.62    5.02
  10  -4 -10   10.19    2.41
 -10   4  10    8.61    5.13
  10   4 -10   14.63    3.64
  10   4 -10   11.95    4.73
  10   4 -10   12.77    2.60
  10  -4 -10    9.22    4.09
 -10   4  10    5.06    5.11
  10  -4 -10   18.67    3.74
 -10   4  10    9.00    3.10
  15   3  -7  135.44    6.38
 -15   3   7  135.07    7.00
 -15   3   7  142.90    8.34
  15  -3  -7  125.17    7.23
  15   3  -7  131.68    7.55
 -15  -3   7  160.94    7.99
 -15  -3   7  139.68    7.85
  15   3  -7  143.39    8.65
  15  -3  -7  141.61    7.52
   2   2  11  826.38   34.52
  -2  -2 -11  914.42   35.49
  -2   2 -11  933.31   34.41
  -2   2 -11  884.68   36.47
  -2   2 -11  950.13   35.48
   2  -2  11  903.16   35.58
   2   2  11  881.28   35.81
   2   2  11  893.87   35.87
  -2  -2 -11  884.13   34.42
  -2  -2 -11  832.84   34.18
  -2   2 -11  875.91   34.23
 -11  -5  -1 2185.71   86.61
  11  -5   1 2457.24   87.74
 -11  -5  -1 2230.56   86.99
  11   5   1 2153.05   86.86
  11   5   1 2193.54   86.82
 -11  -5  -1 2302.18   87.52
  11   5   1 2199.24   86.61
 -11   5  -1 2267.65   87.22
 -11   5  -1 2253.03   86.70
 -11   5  -1 2237.64   87.38
  11  -5   1 2218.34   86.43
 -11   5  -1 2347.63   86.76
  11  -5   1 2243.77   87.19
  11   5   1 2131.64   86.49
  11  -5   1 2224.53   86.65
 -11  -5  -1 2333.37   86.92
   3   3  10  240.42   11.63
   3   3  10  245.10   11.54
  -3  -3 -10  195.07    8.76
  -3  -3 -10  243.06   10.22
   3  -3  10  234.24   10.14
   3   3  10  228.32   10.16
  -3   3 -10  240.38    9.82
  -3   3 -10  251.94    9.53
  -3   3 -10  252.37   11.05
   3  -3  10  250.59   11.06
  -3   3 -10  253.34   12.71
  -3  -3 -10  250.43   10.90
   3  -7   2 1339.68   51.41
   3  -7   2 1229.59   52.34
  -3   7  -2 1380.51   51.81
  -3  -7  -2 1267.26   52.32
   3   7   2 1358.32   51.91
   3   7   2 1281.57   51.40
  -3  -7  -2 1301.58   52.31
   3   7   2 1360.57   51.35
  -3   7  -2 1263.22   51.97
   3  -7   2 1314.02   51.63
   3  -7   2 1361.08   52.75
  -3  -7  -2 1321.60   51.83
 -11  -1  -6  323.63   13.75
 -11  -1  -6  304.64   14.73
 -11   1  -6  288.36   13.67
  11  -1   6  326.96   13.75
  11   1   6  299.76   13.87
  11  -1   6  318.48   12.48
  11  -1   6  314.68   12.54
  11   1   6  285.39   12.08
 -11   1  -6  306.93   14.00
  11   1   6  286.24   14.40
  11   1   6  299.31   12.82
  11   1   6  301.24   12.17
  11  -1   6  315.36   14.38
   5   7  -1   83.13    6.16
  -5  -7   1   73.02    5.59
  -5   7   1   65.68    5.89
  -5   7   1   82.93    6.20
  -5  -7   1   68.17    6.59
   5  -7  -1   67.17    6.89
   5   7  -1   81.62    5.91
  -5   7   1   89.72    6.18
  -5  -7   1   76.63    5.96
   5   7  -1   60.76    5.80
  -5   7   1   75.55    6.36
   5   7  -1   82.25    5.91
   5  -7  -1   78.98    6.60
  14  -4  -2  240.74   12.06
 -14   4   2  248.06   11.75
  14  -4  -2  269.67   11.98
 -14   4   2  247.60   11.90
 -14   4   2  254.54   11.05
  14   4  -2  259.43   11.99
  14   4  -2  255.31   11.51
 -14  -4   2  248.48   11.39
  14   4  -2  250.24   12.06
 -14   4   2  246.79   12.45
  14  -4  -2  249.84   12.48
 -14  -4   2  254.86   12.44
 -14  -4   2  256.92   11.31
 -14  -4   2  255.49   12.19
  10   0   7    1.98    2.49
  10   0   7    0.26    5.16
  10   0   7   -5.39    4.57
 -10   0  -7    2.54    4.49
 -10   0  -7   -1.94    5.30
  14   2 -10   42.04    5.60
  14  -2 -10   29.59    5.12
  14  -2 -10   43.88    5.50
  14   2 -10   36.84    4.43
 -14  -2  10   30.64    4.66
 -14  -2  10   40.56    5.77
  14   2 -10   29.91    2.59
  14  -2 -10   39.41    3.35
  14  -2 -10   41.65    3.96
  14   2 -10   36.24    4.18
 -14   2  10   23.69    4.35
 -14  -2  10   41.05    5.53
 -16   2   7  766.37   31.10
  16  -2  -7  860.35   32.45
  16  -2  -7  840.02   32.73
  16   2  -7  738.74   31.35
 -16   2   7  813.75   32.64
 -16  -2   7  865.04   31.86
  16   2  -7  795.72   32.14
  16  -2  -7  809.54   32.06
  -5  -7   2 1613.33   63.33
   5   7  -2 1654.29   63.16
   5   7  -2 1564.69   62.88
   5   7  -2 1555.59   63.16
   5  -7  -2 1640.95   63.58
   5  -7  -2 1612.89   63.30
  -5   7   2 1629.85   63.29
  -5   7   2 1566.35   62.73
  -5  -7   2 1559.51   62.45
  -5   7   2 1667.55   63.25
  -5   7   2 1706.11   62.99
  -5  -7   2 1623.42   62.56
  16  -2  -2  109.95    8.52
 -16  -2   2  104.08    7.63
  16  -2  -2  115.45    7.48
 -16   2   2  120.56    6.89
 -16  -2   2  122.85    6.51
 -16   2   2  117.74    7.37
 -16  -2   2  107.90    7.95
 -16   2   2  134.38    7.26
 -16  -2   2  128.26    7.31
 -16  -2   2  115.90    7.42
  16  -2  -2  132.96    7.64
  16   2  -2  116.00    7.65
  16  -2  -2  130.03    7.73
  16   2  -2  120.76    7.31
  13   1   4  984.34   38.57
 -13   1  -4 1007.58   39.69
 -13  -1  -4  888.51   38.52
  13  -1   4 1035.46   37.87
 -13  -1  -4  840.98   38.85
 -13   1  -4  969.22   39.30
  13   1   4  960.86   38.59
  13  -1   4  985.18   37.69
  13   1   4  970.09   38.98
 -13   1  -4  945.28   38.82
  13  -1   4  949.92   38.40
  12   0 -12  127.61    6.09
  12   0 -12  130.25    7.22
  12   0 -12  109.27    6.25
  12   0 -12  123.99    6.49
  12   0 -12  139.70    7.61
 -12   0  12  126.33    7.83
   0  -6  -7 2449.33  101.34
   0   6  -7 2642.52  101.21
   0   6  -7 2732.30  100.63
   0  -6   7 2715.36  100.78
   0   6   7 2557.14  100.83
   0  -6  -7 2624.90  100.79
   0   6   7 2558.76  100.39
   0   6   7 2618.81  101.36
  -3   1 -11  469.66   20.12
  -3   1 -11  391.83   17.13
   3   1  11  484.01   19.50
   3  -1  11  477.02   19.38
  -3  -1 -11  486.09   18.85
  -3  -1 -11  492.80   18.23
  -3  -1 -11  457.26   19.41
   3   1  11  472.98   17.70
  -3   1 -11  481.62   18.19
 -14   4   6  790.38   31.00
 -14   4   6  814.80   30.60
 -14  -4   6  785.78   31.12
  14   4  -6  777.91   30.11
  14  -4  -6  776.34   31.79
 -14   4   6  763.64   31.53
 -14  -4   6  802.23   30.34
 -14  -4   6  610.14   31.51
  14   4  -6  780.12   31.88
  14  -4  -6  755.20   31.08
  14   4  -6  792.67   31.07
  14  -4  -6  781.61   30.90
 -14  -4   6  759.69   31.90
  14   0   3    2.85    4.61
 -14   0  -3    1.38    4.74
 -14   0  -3    1.32    5.17
  14   0   3    1.24    5.03
   8   0 -13    2.40    4.37
   8   0 -13    1.52    3.98
   8   0 -13   -4.52    3.78
   8   0 -13    1.33    3.58
   8   0 -13   -1.78    4.24
  -7  -1  -9  985.18   37.13
  -7   1  -9  999.32   36.05
   7  -1   9  975.62   36.99
  -7  -1  -9  996.49   35.99
   7   1   9  981.38   37.06
   7  -1   9  847.94   34.80
  -7   1  -9  977.92   37.38
  -7   1  -9  944.17   36.50
   7   1   9  870.14   35.25
   1   7  -4 1536.52   66.43
   1  -7  -4 1725.61   66.66
  -1   7   4 1732.06   65.55
  -1   7   4 1733.49   66.40
  -1  -7   4 1781.53   67.48
   1   7  -4 1724.53   66.24
  -1  -7   4 1652.07   66.84
  11   3 -11  473.45   16.13
  11   3 -11  448.09   17.74
 -11   3  11  445.53   16.60
  11   3 -11  413.89   16.01
  11   3 -11  431.39   16.99
  11  -3 -11  450.23   16.70
 -11  -3  11  309.71   17.35
  11  -3 -11  448.18   17.52
  11  -3 -11  301.43   15.38
  11  -3 -11  441.94   16.68
  12   4  -9  422.34   17.16
 -12  -4   9  434.40   17.24
 -12  -4   9  421.06   18.65
  12   4  -9  407.14   18.59
  12  -4  -9  426.87   17.78
 -12   4   9  415.35   18.54
 -12   4   9  422.73   17.69
  12   4  -9  426.43   18.05
  12  -4  -9  362.87   18.14
  12   4  -9  420.48   16.85
 -12   4   9  417.01   17.95
  12  -4  -9  440.67   17.76
  -8  -2  -8  187.21   10.28
   8  -2   8  205.78    8.60
   8  -2   8  198.19    9.37
  -8   2  -8  183.89    9.25
   8  -2   8  190.13   10.28
   8   2   8  184.60    8.91
  -8   2  -8  196.14   10.11
  -8  -2  -8  201.97    9.07
   3  -7  -4   63.68    6.19
  -3  -7   4   66.46    4.45
   3   7  -4   76.13    5.46
  -3   7   4   62.75    4.09
   3  -7  -4   72.27    6.85
  -3  -7   4   75.80    6.85
  -3   7   4   60.28    5.76
  -3   7   4   70.97    5.88
   6   4 -11  159.63    8.63
  -6  -4  11  158.07   10.48
   6  -4 -11  149.27    8.71
  -6   4  11  155.36    8.85
   6   4 -11  159.56    8.59
   6  -4 -11  169.98    8.08
   5   7   0   58.54    5.24
  -5   7   0   57.48    6.00
   5   7   0   52.12    5.49
  -5  -7   0   62.07    5.36
  -5  -7   0   54.31    5.46
   5   7   0   54.12    5.42
  -5   7   0   57.32    5.24
   5   7   0   64.00    5.74
   5  -7   0   40.49    6.82
   5  -7   0   63.04    5.60
  -5   7   0   57.61    5.45
  -5  -7   0   58.61    6.33
  -5  -7   0   61.17    6.19
   5  -7   0   66.51    6.41
   7  -3   8  684.90   25.06
   7  -3   8  607.90   25.91
   7  -3   8  636.78   24.88
  -7  -3  -8  587.34   24.60
  -7   3  -8  660.41   24.94
   7   3   8  638.19   26.39
  -7  -3  -8  613.48   25.77
  -7  -3  -8  643.15   26.91
   7   3   8  530.52   25.99
   7   3   8  611.13   25.08
   4   0 -13    2.35    4.82
   4   0 -13    3.06    3.67
   4   0 -13    0.26    5.11
   4   0 -13   -1.36    3.03
   4   0 -13    3.00    3.19
   4   0 -13   -2.92    6.34
   8   6   2 1930.73   78.58
  -8  -6  -2 2041.87   79.06
   8  -6   2 1942.72   78.85
  -8  -6  -2 2048.89   78.63
   8  -6   2 2046.55   79.94
   8  -6   2 2024.51   78.24
  -8   6  -2 2060.59   78.47
   8   6   2 2059.28   78.25
  -8   6  -2 2093.88   78.93
  -8   6  -2 2054.18   78.70
  -8   6  -2 2055.09   79.25
   8  -6   2 1955.80   78.23
   8   6   2 1995.73   78.48
  -8  -6  -2 2080.03   78.74
   8   6   2 2022.96   78.85
   7   1 -13 1594.76   61.50
   7   1 -13 1637.60   62.03
   7  -1 -13 1570.81   62.18
   7  -1 -13 1569.11   62.01
   7   1 -13 1538.30   61.48
   7   1 -13 1434.78   62.13
   7  -1 -13 1662.73   61.76
   7  -1 -13 1601.38   62.39
   7   1 -13 1563.43   61.90
   7  -1 -13 1640.81   62.46
   7  -1 -13 1638.68   61.63
   7   1 -13 1599.97   61.68
  -6   6  -4  191.28    9.01
   6   6   4  179.29    8.52
  -6  -6  -4  184.29   10.51
  -6   6  -4  198.09   10.96
  -6   6  -4  181.15    9.54
   6   6   4  205.06    9.25
   6  -6   4  201.17    9.04
   6  -6   4  182.87   11.67
   6   6   4  202.91    9.68
   6   6   4  203.68    9.77
  -6  -6  -4  179.29    9.35
  -6  -6  -4  191.31   10.40
   6  -6   4  192.24    8.70
   6  -6   4  185.10    9.65
 -14   0  11    3.47    5.01
  14   0 -11    4.13    4.22
  14   0 -11    3.42    4.21
  14   0 -11    1.15    2.14
 -15  -3   1    7.76    4.95
 -15  -3   1   21.18    4.64
  15   3  -1   27.65    4.85
  15  -3  -1   29.34    5.41
  15   3  -1   27.73    5.01
  15  -3  -1   31.16    4.88
 -15  -3   1   20.31    4.26
  15   3  -1   24.49    4.82
 -15  -3   1   28.04    4.20
 -15   3   1   14.31    5.03
  15  -3  -1   34.31    6.78
 -15   3   1   24.26    4.47
 -15   3   1   30.00    4.86
  15  -3  -1   32.01    4.73
 -15   3   1   25.74    4.81
   4   4 -11   44.59    3.42
   4  -4 -11   36.24    5.53
   4   4 -11   44.99    3.50
   4  -4 -11   49.20    4.10
   4  -4 -11   43.10    2.82
  -4  -4  11   49.47    3.72
   4   4 -11   43.59    5.59
  -4   4  11   45.53    4.94
  -4  -4  11   33.30    6.95
   4  -4 -11   38.97    5.03
   4   4 -11   44.94    4.94
  -5  -7   3    7.11    4.85
   5   7  -3    1.59    4.12
   5   7  -3    4.77    4.12
  -5   7   3    1.75    4.07
  -5   7   3   -1.52    3.55
  -5  -7   3   -2.25    3.71
  -5   7   3   -2.44    4.38
   5  -7  -3   -5.53    4.60
  -5   7   3    0.66    4.37
  -5   7   3   -7.15    4.86
   5  -7  -3   -8.97    5.28
  -5  -7   3   -1.07    3.38
  10   6  -3 1860.06   72.50
 -10  -6   3 1827.07   71.51
 -10   6   3 1857.83   71.75
  10  -6  -3 1907.28   72.35
  10  -6  -3 1787.96   72.56
 -10   6   3 1836.68   72.51
 -10   6   3 1901.36   71.78
  10   6  -3 1875.81   72.47
  10   6  -3 1890.74   72.26
 -10  -6   3 1815.03   72.12
 -10  -6   3 1933.87   71.98
 -10   6   3 1853.44   72.46
  10  -6  -3 1754.78   72.33
 -10  -6   3 1870.40   72.90
   5   3 -12  130.23    6.78
  -5  -3  12  164.58   11.09
   5   3 -12  208.22    9.41
   5  -3 -12  227.94    9.97
   5   3 -12  210.06    8.02
   5  -3 -12  227.80    9.15
   5  -3 -12  201.85    7.91
  -5  -3  12  234.17    8.32
  -5   3  12  252.74    9.64
   5  -3 -12  224.63    8.35
   5  -3 -12  168.76    7.16
   5   3 -12  220.69    9.13
   5   3 -12  208.17    7.98
  17  -1  -5   55.23    5.81
 -17   1   5   60.92    5.56
 -17   1   5   64.80    4.12
 -17  -1   5   61.44    4.53
  17  -1  -5   49.25    5.80
  17   1  -5   60.77    5.08
 -17   1   5   62.55    3.54
 -17  -1   5   42.09    2.32
 -17   1   5   56.97    6.19
  17   1  -5   53.95    5.65
  17  -1  -5   63.74    5.62
 -17   1   5   70.06    3.53
   5  -1 -13  933.33   37.28
   5  -1 -13  984.15   36.71
   5   1 -13  960.86   36.80
   5  -1 -13  950.28   37.93
   5   1 -13  965.09   36.45
   5  -1 -13  939.09   37.33
   5   1 -13  945.92   36.92
   5   1 -13  895.75   36.93
   5  -1 -13  906.51   37.92
   5   1 -13  982.42   38.47
   5  -1 -13  833.99   36.30
   5   1 -13  960.87   37.88
 -10  -6   2 1816.04   72.10
 -10   6   2 1894.18   71.95
 -10   6   2 1883.90   72.70
 -10   6   2 1858.52   72.54
 -10  -6   2 1883.45   72.98
  10   6  -2 1867.71   72.55
 -10  -6   2 1826.15   71.77
  10  -6  -2 1911.12   72.68
  10   6  -2 1848.13   72.37
  10  -6  -2 1845.78   72.48
 -10  -6   2 1880.81   72.36
  10   6  -2 1807.51   72.42
  10  -6  -2 1829.13   72.81
 -10   6   2 1893.27   72.16
   7  -3 -12 1252.55   42.26
   7  -3 -12 1209.11   42.55
   7   3 -12 1171.71   42.37
   7   3 -12 1075.29   41.36
   7   3 -12 1166.55   42.68
  -7  -3  12 1145.15   44.01
  -7   3  12 1246.46   42.99
   7  -3 -12 1155.59   41.55
   7  -3 -12 1164.95   42.88
   7  -3 -12 1036.64   41.45
 -17   1   4   14.76    4.71
  17   1  -4    9.89    4.68
  17  -1  -4   16.03    4.75
 -17  -1   4   16.56    3.87
 -17  -1   4   10.72    5.30
  17   1  -4   11.69    4.40
 -17  -1   4    8.92    2.40
 -17   1   4   17.85    3.10
 -17   1   4   17.30    3.99
 -17  -1   4   16.26    2.53
 -17  -1   4   15.70    4.91
 -17   1   4   11.06    5.15
  16   0  -9    1.03    3.79
  16   0  -9   -0.20    4.42
  16   0  -9    0.81    4.12
 -16   0   9   -3.53    4.32
 -16   0   9    0.72    1.81
  16   0   0  477.01   20.12
 -16   0   0  469.52   20.36
 -16   0   0  470.35   20.39
  16   0   0  455.52   19.89
  15   1 -10  454.78   15.26
  15   1 -10  435.74   14.19
 -15   1  10  439.80   15.63
  15  -1 -10  441.23   14.60
  15  -1 -10  468.70   15.79
  15   1 -10  397.17   14.94
 -15  -1  10  386.38   14.52
 -15  -1  10  444.28   16.15
  13   3 -10  542.16   22.45
  13  -3 -10  587.35   23.09
 -13  -3  10  555.62   23.37
 -13   3  10  571.52   22.98
  13   3 -10  571.40   23.88
  13  -3 -10  545.35   23.42
  13  -3 -10  585.23   22.53
  13   3 -10  531.42   21.63
  13  -3 -10  560.94   22.01
 -13  -3  10  616.32   22.91
  13   3 -10  544.61   22.82
  10  -6  -4   56.72    5.65
 -10   6   4   76.07    5.81
 -10  -6   4   63.27    4.06
 -10  -6   4    5.61    6.02
 -10  -6   4   75.39    5.69
  10  -6  -4   64.61    6.29
 -10  -6   4   72.41    5.29
  10   6  -4   69.18    5.78
  10   6  -4   69.43    5.96
  10   6  -4   62.64    5.77
 -10   6   4   67.55    5.87
  10  -6  -4   64.33    5.36
 -10   6   4   54.80    4.39
 -10   6   4   80.86    5.06
 -17   1   6    6.41    4.88
 -17   1   6    3.85    4.36
  17  -1  -6    7.92    4.46
  17  -1  -6   -1.76    4.96
 -17  -1   6   11.69    3.23
  17  -1  -6    6.66    4.48
 -17   1   6    5.00    1.40
  17   1  -6    1.03    4.64
  17   1  -6    3.65    3.70
   3   5   8  113.99    7.27
   3  -5   8  122.25    7.37
   3   5   8  123.29    7.42
   3   5   8  121.42    6.14
  -3  -5  -8  119.42    6.24
  -3   5  -8  125.54    5.65
   3  -5   8  120.50    7.35
  -3  -5  -8  120.77    6.83
   3  -5   8  125.52   10.28
  -3   5  -8  123.20    8.98
  -3   5  -8  122.85    6.92
  -9   5   9  153.78    8.76
  -9   5   9  152.76    7.15
  -9   5   9  144.50    8.94
   9   5  -9  140.30    7.69
   9   5  -9  158.70    8.77
  -9  -5   9  143.19    9.06
   9  -5  -9  137.16    8.14
   9  -5  -9  138.98    7.01
  -9  -5   9  142.51    6.33
 -11   3  -5   72.36    6.89
  11  -3   5   69.76    6.26
 -11   3  -5   60.42    6.19
 -11   3  -5   72.98    5.81
 -11  -3  -5   68.77    6.11
 -11  -3  -5   72.38    5.31
  11   3   5   67.68    5.45
  11  -3   5   69.17    5.10
 -11  -3  -5   64.70    6.92
  11   3   5   69.03    5.29
  11  -3   5   68.11    5.56
  11   3   5   70.97    6.38
  11  -3   5   63.34    4.00
  11   3   5   56.75    4.04
  -5   5  -7  928.34   35.17
   5   5   7  863.24   36.13
  -5   5  -7  931.60   37.60
   5  -5   7  895.92   36.38
  -5  -5  -7  889.62   35.44
   5  -5   7  945.49   35.16
  -5  -5  -7  915.57   36.08
   5  -5   7  984.73   38.52
  -5  -5  -7  858.57   36.97
  -5   5  -7  891.61   35.96
   5   5   7  852.93   35.33
   5   5   7  918.22   36.27
   5  -5   7  906.74   36.10
  14   4  -1   -3.31    4.67
 -14  -4   1   -0.92    4.59
  14   4  -1    2.65    4.14
 -14  -4   1    4.77    4.22
  14  -4  -1   -1.84    4.36
  14  -4  -1   -0.24    5.66
 -14   4   1   -1.28    5.02
 -14   4   1   -4.04    4.67
  14  -4  -1    2.03    4.56
 -14  -4   1   -0.32    4.09
 -14   4   1    5.25    4.70
 -14   4   1    1.30    3.85
  14   4  -1    8.65    4.40
 -14  -4   1    1.68    4.75
   9   5   4  292.89   14.16
  -9  -5  -4  307.00   14.01
   9  -5   4  327.35   13.29
  -9   5  -4  322.29   13.19
   9  -5   4  304.41   12.89
   9   5   4  281.95   13.03
  -9  -5  -4  317.49   13.32
  -9   5  -4  314.94   14.74
  -9  -5  -4  305.54   14.57
   9   5   4  275.46   13.74
   9  -5   4  318.03   13.80
   9  -5   4  343.45   15.98
   9  -5   4  303.34   14.33
   9   5   4  302.67   13.04
  -1  -3 -11  275.42   11.98
  -1   3 -11  274.21   12.36
  -1  -3 -11  284.98   12.50
  -1   3 -11  275.03   11.77
   1  -3  11  278.75   12.05
   1  -3  11  288.14   12.59
  -1   3 -11  255.27   10.99
  -1  -3 -11  307.99   14.40
   1   3  11  284.31   12.15
   1   3  11  269.94   13.07
  -1   3 -11  275.89   14.29
   5   7   1    1.57    4.08
   5   7   1    5.30    4.49
   5  -7   1    4.47    4.42
  -5  -7  -1   10.22    5.34
  -5   7  -1   10.89    5.07
  -5  -7  -1   12.96    4.90
   5  -7   1    4.09    4.04
  -5   7  -1    2.06    3.96
  -5  -7  -1    1.41    5.11
  -5   7  -1   -1.76    4.71
  -5  -7  -1    3.57    5.02
   5   7   1    1.84    3.85
   5  -7   1    5.57    5.54
 -10   6   1 1841.27   70.05
 -10  -6   1 1826.92   70.52
  10   6  -1 1832.84   70.17
 -10  -6   1 1814.54   69.80
 -10  -6   1 1768.91   69.92
  10  -6  -1 1734.53   69.83
  10  -6  -1 1785.68   70.43
  10   6  -1 1790.08   69.84
 -10   6   1 1860.46   69.62
  10   6  -1 1758.96   69.97
 -10   6   1 1807.95   70.38
 -10   6   1 1851.92   69.98
  10  -6  -1 1730.69   70.41
 -10  -6   1 1729.78   69.44
 -14  -4   7   21.44    4.62
  14   4  -7   29.32    5.54
  14  -4  -7   26.23    3.88
 -14   4   7   19.94    4.74
  14  -4  -7    9.94    5.51
 -14  -4   7   17.82    2.77
  14   4  -7   18.54    4.36
  14  -4  -7   22.41    5.42
  14  -4  -7   20.99    4.22
 -14   4   7   15.00    4.25
 -14  -4   7   14.47    5.20
 -14  -4   7   25.75    5.22
  17   1  -3    5.04    4.38
 -17  -1   3    6.49    4.00
  17   1  -3   10.81    4.62
 -17  -1   3    7.33    4.80
 -17  -1   3    7.31    3.34
  17  -1  -3   10.59    4.72
 -17   1   3    5.21    4.51
 -17  -1   3   12.45    4.70
 -17   1   3    7.23    3.53
 -17   1   3    8.53    4.93
   8  -4 -11    3.91    4.19
  -8   4  11    8.26    2.72
  -8   4  11    2.58    4.85
   8  -4 -11    5.06    2.82
   8  -4 -11   -1.13    4.29
   8   4 -11    2.28    4.04
  -8  -4  11    7.27    5.98
   8   4 -11   -4.30    4.62
   1  -7   4   11.36    5.40
   1  -7   4   12.08    4.58
  -1   7  -4    7.07    4.25
   1  -7   4   12.83    6.13
   1  -7   4   16.03    4.15
   1   7   4   17.22    3.58
  -1  -7  -4   14.17    5.32
   1   7   4    7.87    4.71
   1   7   4    9.96    3.10
  -1   7  -4   11.20    4.40
   1   7   4   13.18    4.33
   1  -7   4    6.93    2.86
  -1  -7  -4   15.78    4.94
  15   3  -8  323.36   14.22
 -15   3   8  345.19   13.92
  15  -3  -8  336.10   13.90
  15  -3  -8  314.38   15.15
  15  -3  -8  335.99   13.97
 -15  -3   8  338.79   14.34
  15   3  -8  303.41   13.02
 -15   3   8  321.21   14.87
  15   3  -8  321.75   15.45
 -15  -3   8  354.02   14.71
 -16  -2   8  539.60   24.06
  16   2  -8  536.46   22.38
  16  -2  -8  586.56   23.86
 -16  -2   8  565.46   23.34
  16   2  -8  566.74   23.29
 -16   2   8  547.22   22.22
  16  -2  -8  605.30   23.25
 -16  -2   8  594.61   23.03
 -16   2   8  567.39   23.84
 -16   2   1  800.60   33.69
 -16  -2   1  830.26   34.22
 -16   2   1  816.16   33.15
 -16  -2   1  885.13   33.48
 -16  -2   1  770.74   33.09
 -16   2   1  925.81   33.67
  16  -2  -1  852.01   33.71
 -16  -2   1  801.46   33.85
  16   2  -1  818.62   33.73
  16   2  -1  819.71   33.64
  16  -2  -1  837.43   33.49
  16  -2  -1  850.80   33.92
   9  -1 -13   78.74    5.98
   9   1 -13   65.92    5.43
   9  -1 -13   83.42    6.53
   9  -1 -13   91.06    5.98
   9   1 -13   84.34    5.39
   9   1 -13   91.04    6.36
   9  -1 -13   71.14    5.66
   9   1 -13   84.47    5.31
   9  -1 -13   68.58    6.01
   9   1 -13   76.48    6.15
   9   1 -13   76.59    5.01
   9  -1 -13   77.87    5.45
   3   7   3    8.05    3.37
   3  -7   3   12.75    4.41
   3   7   3   16.42    3.88
   3   7   3    8.31    4.94
  -3   7  -3   14.54    3.99
   3  -7   3    8.81    5.31
   3  -7   3    7.67    3.23
  -3   7  -3    8.82    5.62
   3   7   3   10.57    4.38
  -3   7  -3    2.36    4.22
  -3  -7  -3   12.04    5.01
   3  -7   3    4.67    5.83
  -3  -7  -3    8.27    4.93
  -5   7   4  122.63    7.37
  -5  -7   4  113.83    6.05
   5  -7  -4  108.70    7.97
  -5  -7   4  109.65    6.01
   5   7  -4  106.82    7.17
   5   7  -4  118.06    6.84
  -5  -7   4  118.97    7.98
  -5   7   4  112.32    5.95
  -5   7   4  111.39    7.29
  -5   7   4  111.37    6.61
   5  -7  -4   95.91    7.27
  -8  -6   7  234.21   12.77
   8   6  -7  251.63   11.40
   8   6  -7  259.08   11.52
  -8   6   7  251.97   10.88
   8  -6  -7  210.24   10.98
  -8  -6   7  241.51   11.92
   8  -6  -7  259.88   12.09
  -8  -6   7  241.23   10.23
   3   3 -12  892.14   26.56
  -3  -3  12  885.44   26.42
   3   3 -12  870.27   25.46
   3  -3 -12  875.88   26.44
   3   3 -12  958.94   29.51
  -3   3  12  853.73   26.79
   3  -3 -12  870.42   25.66
   3   3 -12  859.29   26.13
   3  -3 -12  909.71   28.09
   3  -3 -12  816.10   26.10
  -4   6   8  566.44   24.74
   4  -6  -8  660.46   26.69
   4   6  -8  728.18   26.75
  -4  -6   8  708.39   25.23
  -4  -6   8  666.91   27.95
   4  -6  -8  667.68   26.33
   4   6  -8  697.16   26.01
  -4   6   8  738.53   26.95
   4  -6  -8  689.44   26.11
  11   5  -8  306.56   12.60
 -11  -5   8  304.60   12.66
  11  -5  -8  269.85   13.89
 -11   5   8  331.10   13.33
 -11   5   8  324.97   13.98
  11   5  -8  292.77   12.80
  11  -5  -8  297.80   13.61
  11  -5  -8  280.30   12.20
 -11  -5   8  318.66   14.54
  -1  -1 -12 1102.94   41.86
  -1  -1 -12 1044.08   42.50
   1  -1  12 1113.86   42.49
  -1  -1 -12 1086.55   41.02
   1   1  12 1067.89   42.61
  -1   1 -12 1168.19   43.35
  -1   1 -12 1058.48   41.34
  -1   1 -12 1056.74   42.17
   1   1  12 1051.45   41.15
  -1   1 -12 1005.92   40.78
 -10   6   5  175.29    7.30
 -10  -6   5  174.34    8.85
  10   6  -5  174.45    9.15
 -10   6   5  181.68    9.28
  10  -6  -5  182.32    9.57
 -10  -6   5  165.84    8.32
  10   6  -5  172.38    8.61
 -10  -6   5  149.84    6.94
  10   6  -5  180.56    9.39
 -10  -6   5  172.70    9.88
  10  -6  -5  160.05    8.30
  10  -6  -5  169.97    9.20
 -10   6   5  159.58    8.79
  12   2   5  818.43   32.79
  12   2   5  826.95   34.02
  12  -2   5  849.43   34.47
 -12   2  -5  848.24   33.73
  12   2   5  869.76   33.40
 -12   2  -5  874.56   34.79
  12   2   5  859.31   33.74
 -12   2  -5  867.18   34.43
 -12  -2  -5  831.62   34.44
 -12  -2  -5  825.68   33.78
  12  -2   5  847.67   32.87
  12  -2   5  836.30   33.13
  12  -2   5  828.58   33.69
  12   2   5  835.29   34.37
  13  -5  -4  224.78   11.90
 -13   5   4  261.80   12.15
 -13  -5   4  225.18   12.09
  13   5  -4  252.52   11.51
 -13  -5   4  258.56   10.58
  13   5  -4  241.01   12.09
 -13   5   4  249.05   10.99
  13   5  -4  254.43   11.68
 -13  -5   4  256.82   11.75
 -13   5   4  250.54   12.08
  13  -5  -4  238.07   11.14
  13  -5  -4  239.81   12.06
 -13  -5   4  242.96   11.03
 -13   5   4  244.99   11.75
 -13   5   4  245.65   10.52
 -13  -5   4  255.00   12.34
 -17  -1   7  196.51    8.46
  17  -1  -7  196.13    9.69
 -17  -1   7  137.82    9.45
  17  -1  -7  188.00    9.61
  17   1  -7  177.81    8.78
 -17   1   7  186.65   10.08
  17   1  -7  173.58    9.51
  17  -1  -7  188.54    9.79
  10   0 -13    1.03    4.35
  10   0 -13    1.75    3.78
  10   0 -13    7.40    4.12
  10   0 -13    6.68    4.05
  10   0 -13    1.57    3.79
  10   0 -13   -1.85    4.01
   4   4   9  999.98   38.23
  -4   4  -9  985.47   37.43
  -4  -4  -9  973.38   37.78
  -4   4  -9  971.38   37.79
  -4   4  -9  964.69   36.72
   4  -4   9 1010.51   37.63
  -4  -4  -9  921.58   36.61
  -4  -4  -9  978.94   37.53
   4  -4   9  962.70   38.06
   4   4   9  985.77   37.78
  13   5  -3    1.82    4.63
 -13   5   3    1.21    4.58
 -13   5   3    7.58    3.19
  13  -5  -3    1.13    5.20
  13  -5  -3    5.24    4.66
 -13  -5   3    8.58    4.68
 -13  -5   3    0.98    4.96
  13   5  -3    5.24    3.44
 -13   5   3    5.20    4.92
  13   5  -3    0.44    4.84
 -13  -5   3    3.02    3.87
 -13  -5   3   -3.21    4.75
 -13  -5   3    3.09    3.66
 -13   5   3    0.80    3.70
 -13   5   3   -1.80    4.78
   2   4 -11    1.11    6.54
  -2  -4  11   -0.39    6.94
  -2   4  11   -3.26    4.29
   2   4 -11   -0.53    2.14
   2  -4 -11    2.20    4.25
   2  -4 -11    1.80    2.97
  -2  -4  11    7.60    4.69
   2   4 -11    4.08    3.23
   2  -4 -11    0.82    5.58
   2  -4 -11    3.27    2.80
  -2  -4  11    6.74    3.62
   2   4 -11    3.83    3.95
  -9   1  -8  417.39   17.74
  -9  -1  -8  464.44   17.74
  -9  -1  -8  417.60   16.38
  -9   1  -8  412.11   16.87
  -9   1  -8  428.19   16.48
   9  -1   8  421.41   16.56
   9   1   8  403.93   15.53
   9  -1   8  339.34   14.64
   9  -1   8  429.20   17.37
   9  -1   8  417.82   15.07
 -13  -3  -3   36.38    5.75
  13  -3   3   34.17    4.04
  13   3   3   36.08    4.81
 -13   3  -3   41.87    6.06
 -13   3  -3   37.00    6.62
  13   3   3   39.13    5.29
 -13   3  -3   42.40    5.97
  13  -3   3   34.45    4.89
  13  -3   3   36.55    5.99
 -13  -3  -3   35.81    4.97
  13  -3   3   45.53    4.81
  13   3   3   36.15    4.01
  13   3   3   42.85    5.11
 -13  -3  -3   41.26    5.73
  -6   0 -10 2253.19   88.11
  -6   0 -10 2313.19   89.06
   6   0  10 2258.51   88.85
  -6   0 -10 2293.59   87.96
   0  -2 -12   12.93    3.43
   0   2  12   17.13    5.22
   0   2  12   12.33    3.61
   0  -2 -12    6.08    5.88
   0   2 -12   16.06    6.48
   0  -2 -12   11.00    4.54
   0   2 -12    9.60    2.89
   0  -2 -12   14.60    2.38
   0   2 -12   10.42    2.94
   0   2 -12   14.40    4.61
   0  -2 -12    9.74    2.39
   0  -2  12   17.47    4.70
  -5  -5  10   22.32    6.94
   5   5 -10   25.72    5.21
  -5   5  10   14.05    5.00
   5  -5 -10   15.98    4.30
   5  -5 -10   20.34    4.31
   5   5 -10   25.94    4.79
   5  -5 -10   15.59    4.64
   5   5 -10   20.36    3.69
  -5  -5  10   19.42    2.11
   3  -1 -13   52.31    5.75
   3   1 -13   61.65    3.66
   3   1 -13   54.76    4.72
   3   1 -13   53.72    4.30
   3  -1 -13   54.35    4.31
   3   1 -13   52.93    4.09
   3  -1 -13   37.30    7.35
   3   1 -13   51.47    7.21
   3   1 -13   60.51    5.57
   3  -1 -13   55.88    4.02
   3  -1 -13   52.17    4.16
  -3  -1  13   52.45    5.19
  -1   5  -9  555.95   22.81
  -1   5  -9  561.32   24.78
  -1   5  -9  563.70   21.74
  -1  -5  -9  538.49   22.09
  -1  -5  -9  559.80   22.26
  -1  -5  -9  489.79   23.81
   1   5   9  578.74   22.65
   1   5   9  542.49   23.05
   1  -5   9  570.03   23.06
   1  -5   9  544.26   22.70
  -4   0 -11   -5.43    5.44
   4   0  11    1.50    5.15
  -4   0 -11    1.65    3.93
  -4   0 -11    6.62    4.15
   9   3 -12 1329.93   47.73
   9  -3 -12 1082.73   46.95
   9  -3 -12 1103.65   46.78
   9  -3 -12 1231.79   48.01
  -9   3  12 1403.55   48.77
  -9   3  12 1428.87   47.66
   9  -3 -12 1171.07   47.87
   9  -3 -12 1400.10   47.56
   9   3 -12 1215.35   46.99
  -9  -3  12 1178.77   49.05
   9   3 -12 1259.39   48.40
   9   3 -12 1453.66   48.73
  10   4   5   84.04    6.89
  10  -4   5   87.01    5.68
 -10   4  -5   79.36    5.72
  10   4   5   76.74    4.77
  10  -4   5   84.83    6.63
 -10  -4  -5   85.52    5.24
  10   4   5   77.51    5.31
 -10   4  -5   81.51    7.07
  10  -4   5   71.36    4.43
  10  -4   5   85.95    5.72
 -10  -4  -5   79.13    7.02
 -10  -4  -5   75.93    6.48
 -10   4  -5   79.94    7.50
  10   4   5   74.11    5.84
  15  -1   2 1539.07   59.13
 -15   1  -2 1483.67   60.13
  15  -1   2 1493.76   60.03
  15   1   2 1494.72   59.96
 -15  -1  -2 1463.65   59.87
 -15   1  -2 1479.09   60.06
  15  -1   2 1503.10   59.64
  15   1   2 1463.05   59.71
  15  -1   2 1591.22   59.27
 -15   1  -2 1677.70   60.54
   2   6  -8  965.32   36.01
   2  -6  -8  872.38   36.93
  -2   6   8  905.74   36.84
   2  -6  -8  864.00   36.10
   2  -6  -8  880.27   36.68
  -2  -6   8  942.88   35.85
   2   6  -8  929.00   36.63
 -11   5  -2   10.47    5.11
 -11   5  -2    6.44    5.17
  11  -5   2    3.28    4.66
  11   5   2    5.81    4.71
 -11  -5  -2    1.69    4.40
 -11  -5  -2    1.10    5.45
 -11  -5  -2    7.14    4.97
  11   5   2    7.77    4.50
 -11  -5  -2    4.44    4.88
  11   5   2    4.11    4.13
  11  -5   2    2.15    3.92
  11  -5   2    7.27    4.03
 -11   5  -2    4.87    4.93
  11  -5   2    0.31    6.49
  11   5   2   10.03    3.90
   6  -4   8 1756.08   59.33
   6  -4   8 1574.52   59.65
   6   4   8 1541.58   59.89
  -6   4  -8 1526.37   61.26
   6   4   8 1658.66   60.51
   6   4   8 1513.67   60.61
  -6  -4  -8 1610.11   61.19
  -6  -4  -8 1619.63   58.82
  -6  -4  -8 1639.30   60.14
   6  -4   8 1620.69   60.37
  -6   4  -8 1567.22   59.58
  -6   4  -8 1523.23   59.12
  -3   7   5   84.05    4.40
  -3  -7   5   76.37    4.63
   3   7  -5   85.23    5.96
   3  -7  -5   75.19    6.87
   3  -7  -5   94.50    6.69
   3   7  -5   75.43    6.47
  -3  -7   5   89.32    7.40
  -3   7   5   92.99    6.19
  -3  -7   5   88.31    5.16
  -3   7   5   85.27    5.23
  13   5  -5 1653.27   63.51
  13   5  -5 1623.52   64.29
 -13  -5   5 1705.15   64.44
 -13   5   5 1671.54   64.40
 -13  -5   5 1646.26   63.64
  13   5  -5 1689.78   63.74
  13  -5  -5 1639.30   64.02
  13  -5  -5 1442.96   63.07
 -13   5   5 1603.20   64.12
 -13   5   5 1760.57   63.30
 -13   5   5 1569.17   62.87
 -13   5   5 1703.27   63.84
  13  -5  -5 1596.14   64.23
 -13  -5   5 1686.28   63.41
 -13  -5   5 1671.47   62.80
  -6   6   8   99.61    7.21
  -6   6   8   97.70    4.97
   6   6  -8  102.66    6.91
   6   6  -8   94.47    6.84
   6  -6  -8   97.16    7.13
  -6  -6   8   83.99    8.21
   6  -6  -8   85.56    6.13
   6   6  -8  106.05    6.34
   2   0 -13    2.84    2.57
   2   0 -13   -0.13    4.04
  -2   0  13   -1.70    4.76
   2   0 -13    3.45    3.79
   2   0 -13    0.69    2.41
   2   0 -13    3.04    4.71
   2   0 -13    2.08    5.32
  -9   3  -7   81.18    5.46
   9  -3   7   86.66    5.08
  -9   3  -7   79.74    6.81
   9  -3   7   88.34    6.59
   9  -3   7   84.93    5.45
  -9  -3  -7   88.15    7.81
  -9  -3  -7   84.19    6.47
   9   3   7   75.38    5.29
  -9   3  -7   76.85    7.32
   9   3   7   57.05    3.13
  -9  -3  -7   78.90    4.79
   9   3   7   73.53    6.61
  15  -3   0   58.00    6.58
 -15  -3   0   72.37    6.28
  15   3   0   87.50    6.41
 -15   3   0   75.97    6.49
  15  -3   0   75.79    6.19
 -15  -3   0   86.87    6.13
  15  -3   0   86.45    5.96
 -15  -3   0   75.94    6.37
 -15   3   0   88.89    6.52
  15   3   0   81.66    6.57
 -15   3   0   78.55    6.62
  15   3   0   71.00    5.98
   3  -5 -10   37.00    5.67
  -3  -5  10   36.23    7.61
  -3  -5  10   53.80    4.13
   3   5 -10   62.46    5.45
   3   5 -10   48.99    3.96
   3  -5 -10   56.40    4.63
  -3   5  10   51.69    5.36
  -7   5  -6   48.31    6.56
   7  -5   6   35.05    8.05
   7   5   6   39.71    3.71
   7   5   6   44.80    5.97
   7   5   6   39.87    5.62
   7  -5   6   41.62    3.39
   7  -5   6   45.34    5.39
   7  -5   6   45.99    5.45
   7   5   6   36.75    3.30
  -7  -5  -6   52.03    6.36
  -7  -5  -6   46.23    4.30
   7  -5   6   43.70    3.91
  -7   5  -6   42.05    3.63
  -7  -5  -6   42.61    5.40
   7   5   6   40.72    4.69
  -7   5  -6   39.36    4.67
  -1  -7   5   49.94    4.62
  -1   7   5   56.31    3.88
  -1  -7   5   56.23    7.01
  -1  -7   5   42.97    6.39
   1   7  -5   48.87    4.95
  -1   7   5   53.07    3.93
  -1   7   5   47.95    5.68
   1   7  -5   54.33    5.80
  -1   7   5   57.31    5.26
  -1  -7   5   41.41    3.52
   1  -7  -5   53.74    5.84
  -1  -7   5   53.64    3.62
 -13   5   2   86.49    6.65
 -13   5   2   52.84    5.12
 -13  -5   2   93.42    6.74
 -13   5   2   89.60    6.84
  13  -5  -2   94.69    7.26
 -13  -5   2   80.12    5.59
 -13  -5   2   77.76    5.73
  13   5  -2   87.75    6.55
  13   5  -2   89.33    5.75
  13   5  -2   81.04    6.34
  13   5  -2   77.06    6.33
 -13   5   2   90.61    6.20
 -13  -5   2   89.59    7.01
  13  -5  -2   97.17    6.37
 -13   5   2   92.48    6.38
   6   2 -13   93.65    5.37
   6  -2 -13   88.87    6.97
   6  -2 -13   91.61    6.02
   6  -2 -13   89.43    7.62
   6   2 -13  108.62    6.34
   6   2 -13   85.85    4.93
   6  -2 -13  109.85    6.25
   6   2 -13   97.28    5.68
   6  -2 -13   99.21    5.47
  10   6   0  425.34   18.45
 -10   6   0  465.15   18.91
  10  -6   0  419.15   18.84
 -10  -6   0  413.55   18.17
 -10   6   0  439.88   19.14
  10   6   0  441.49   18.89
 -10   6   0  390.11   18.46
 -10  -6   0  445.59   19.26
 -10  -6   0  441.96   18.65
  10   6   0  451.76   19.11
  10   6   0  416.37   18.26
  10  -6   0  418.14   19.31
  10  -6   0  447.07   18.46
 -10   6   0  438.97   18.57
  10  -6   0  426.31   19.36
  10  -6   0  447.91   18.40
  17  -1  -2   50.85    5.81
 -17  -1   2   52.76    6.06
 -17   1   2   45.06    5.76
 -17   1   2   45.39    4.60
 -17   1   2   52.36    5.95
 -17  -1   2   39.78    5.73
  17   1  -2   42.25    5.39
  17   1  -2   45.73    5.84
  17  -1  -2   47.39    5.53
  -2   4 -10  306.95   13.55
  -2   4 -10  314.89   13.21
   2  -4  10  317.50   13.53
  -2  -4 -10  295.62   12.23
  -2  -4 -10  299.35   13.33
   2   4  10  303.27   13.92
  -2  -4 -10  301.92   13.26
  -2  -4 -10  304.17   15.40
   2  -4  10  336.14   13.85
   2   4  10  284.05   13.51
   4  -6   6  108.35    7.43
  -4   6  -6  131.38    9.10
  -4  -6  -6  117.25    6.85
  -4  -6  -6  126.74    8.57
   4  -6   6   88.65    9.27
  -4   6  -6  126.11    7.34
  -4  -6  -6  115.57    8.36
  -4   6  -6  119.60    6.18
   4   6   6  123.54    7.52
   4   6   6  118.35    7.01
   4   6   6  114.37    6.50
   4  -6   6  123.46    5.67
 -12   4  -3   93.35    7.55
 -12  -4  -3   88.82    6.88
  12   4   3   89.44    5.98
  12   4   3   79.19    5.46
 -12   4  -3  103.93    7.49
  12  -4   3   91.33    5.48
 -12   4  -3   83.96    6.47
  12   4   3   88.18    6.82
  12  -4   3   92.18    6.50
 -12  -4  -3   88.06    7.30
  12   4   3   80.77    6.18
 -12  -4  -3   89.12    5.99
  12  -4   3   82.29    7.07
  12  -4   3   77.00    6.30
  -7   5  10   61.66    5.97
   7  -5 -10   57.42    5.27
   7  -5 -10   61.76    5.55
  -7   5  10   57.74    3.34
   7   5 -10   55.72    5.02
  -7  -5  10   62.61    7.62
   7   5 -10   61.04    5.67
   7   5 -10   64.49    5.82
   7  -5 -10   53.90    4.73
   2  -6   7 1534.24   52.70
  -2  -6  -7 1611.35   50.30
   2   6   7 1638.10   50.35
   2   6   7 1694.58   51.24
   2   6   7 1705.41   50.38
   2  -6   7 1779.82   50.82
  -2  -6  -7 1590.65   51.55
  -2   6  -7 1667.40   52.67
  -2   6  -7 1714.91   51.00
  -2   6  -7 1668.08   50.00
  13   1 -12    1.87    3.19
 -13  -1  12    0.74    5.20
  13  -1 -12    0.38    3.45
  13   1 -12    7.09    3.80
  13   1 -12    9.01    2.12
 -13   1  12    3.57    4.55
  13   1 -12    3.51    2.03
  13  -1 -12    0.18    2.79
  13  -1 -12    5.66    4.66
  13   1 -12    7.73    3.24
  13  -1 -12    5.37    2.02
  13  -1 -12    0.90    4.69
 -13  -1  12    7.08    4.83
  10  -2   7 2874.93  110.05
 -10   2  -7 2978.13  111.92
 -10   2  -7 3133.71  111.27
  10  -2   7 2651.17  110.07
  10  -2   7 3132.11  111.36
 -10  -2  -7 2972.06  111.14
  10   2   7 2844.24  112.05
  10   2   7 2928.56  110.89
  10  -2   7 3134.11  110.66
  10  -2   7 2989.54  112.08
 -10  -2  -7 2932.88  112.01
  12   2 -12  258.30    9.94
  12   2 -12  251.21   11.71
  12   2 -12  226.40    9.08
 -12   2  12  249.22   10.65
  12  -2 -12  250.09   11.08
  12  -2 -12  146.36    8.83
  12  -2 -12  269.58   10.94
 -12  -2  12  225.86   11.57
  12   2 -12  263.26    9.48
  12  -2 -12  277.03   10.13
  12  -2 -12  219.94    9.34
  12   2 -12  151.39    9.96
  -5   7  -2 2531.73   95.36
  -5  -7  -2 2413.43   95.38
   5   7   2 2537.89   94.80
  -5  -7  -2 2560.03   95.76
   5  -7   2 2673.56   94.86
  -5   7  -2 2490.66   94.91
   5  -7   2 2404.97   94.50
   5  -7   2 2494.16   95.98
   5   7   2 2141.18   94.17
   5   7   2 2574.03   95.07
  -5  -7  -2 2447.44   94.97
  -5   7  -2 2547.33   95.70
   8   6   3  126.13    7.85
   8  -6   3  132.79    9.74
  -8  -6  -3  128.75    8.48
  -8  -6  -3  129.53    7.80
   8   6   3  136.26    7.32
   8  -6   3  124.76    8.03
   8  -6   3  136.96    7.00
   8   6   3  132.22    6.90
  -8   6  -3  130.60    7.16
   8  -6   3  130.76    7.07
  -8   6  -3  132.68    7.90
  -8   6  -3  122.12    8.66
   8   6   3  125.90    7.86
  14   2   3 1017.32   41.28
  14   2   3  976.96   41.64
  14  -2   3 1055.92   41.34
  14  -2   3 1031.32   40.67
 -14   2  -3 1032.13   42.14
  14   2   3 1057.06   40.78
 -14   2  -3 1010.40   41.83
 -14   2  -3 1127.06   42.29
 -14  -2  -3 1035.28   41.44
  14   2   3 1005.83   41.54
 -14  -2  -3 1003.37   41.95
  14  -2   3 1080.87   40.82
   8  -2 -13  239.86   10.53
   8   2 -13  227.73    9.55
   8   2 -13  238.40   10.79
   8   2 -13  190.78    9.28
   8  -2 -13  240.17    9.85
   8  -2 -13  199.60   10.93
   8  -2 -13  235.12   10.99
   8   2 -13  230.99   10.97
   8  -2 -13  212.66   10.08
   8   2 -13  205.83    9.78
  -8  -2  13  153.26   11.85
  14  -4   0  419.01   19.20
 -14  -4   0  417.46   18.16
 -14  -4   0  434.13   18.85
 -14  -4   0  422.01   18.44
 -14  -4   0  430.86   18.22
  14   4   0  431.50   18.38
  14   4   0  420.44   18.49
  14   4   0  414.79   18.16
  14   4   0  419.31   18.27
  14  -4   0  425.81   17.95
 -14   4   0  419.80   18.31
 -14   4   0  419.67   18.96
  14  -4   0  425.15   18.25
 -14  -4   0  408.19   19.00
 -14   4   0  445.08   18.68
 -14   4   0  448.84   18.24
  -7   7   2  857.53   35.57
  -7  -7   2  873.66   34.97
  -7   7   2  873.78   35.20
  -7   7   2  912.82   35.67
   7   7  -2  881.07   35.65
  -7  -7   2  859.23   34.78
  -7   7   2  846.49   35.70
   7  -7  -2  921.07   36.17
  -7   7   2  898.27   35.12
   7   7  -2  905.01   35.67
   7  -7  -2  940.33   35.66
   7  -7  -2  860.65   35.72
  -7  -7   2  889.79   35.65
   7   7  -2  850.72   35.25
  -8   0  -9   -0.18    4.30
  -8   0  -9   -2.23    4.67
   8   0   9   -5.46    4.94
   8   0   9    1.59    1.46
  -8   0  -9    5.05    5.54
 -10   6   6   26.94    4.46
  10   6  -6   19.59    4.40
  10  -6  -6   16.24    5.36
  10  -6  -6   23.08    5.37
 -10   6   6   10.01    0.99
  10   6  -6   15.50    4.82
 -10  -6   6   17.13    3.60
  10   6  -6   21.73    5.42
 -10  -6   6   19.08    4.73
  10  -6  -6   12.91    3.76
 -10   6   6   16.41    5.19
 -10  -6   6    8.53    5.57
 -13   5   6   71.72    6.51
 -13   5   6   68.35    6.05
 -13   5   6   72.15    4.18
 -13   5   6   72.97    6.12
  13  -5  -6   65.04    6.20
  13   5  -6   66.63    5.22
 -13  -5   6   61.21    6.59
  13   5  -6   61.13    5.99
  13   5  -6   59.05    5.05
 -13  -5   6   72.10    5.60
 -13  -5   6   70.03    5.04
  13  -5  -6   59.68    5.86
  13  -5  -6   53.26    3.84
   5  -7  -5   -2.07    4.54
  -5   7   5    0.93    1.85
  -5   7   5   -1.21    5.14
  -5   7   5   -0.45    2.14
  -5  -7   5    3.45    3.03
  -5   7   5   -3.94    4.51
  -5   7   5    0.14    3.63
  -5  -7   5    6.65    5.49
   5   7  -5   -4.74    4.45
  -5  -7   5    5.30    3.21
   5  -7  -5   -3.01    5.27
 -14  -4   8    0.72    4.22
  14  -4  -8    4.50    3.91
  14   4  -8   -0.72    4.61
  14   4  -8   -2.01    3.69
  14  -4  -8    1.12    3.11
 -14   4   8   -4.83    4.54
  14  -4  -8    0.96    4.93
 -14  -4   8    1.59    5.07
 -14   4   8    2.48    4.35
  14   4  -8    1.31    2.41
  -2   0 -1210069.70  382.49
   2   0  12 9996.53  382.25
  -2   0 -12 9964.68  381.32
  17   1  -8   12.61    4.26
  17  -1  -8   20.80    4.64
 -17  -1   8   15.19    5.02
 -17  -1   8   14.20    3.25
  17  -1  -8   15.24    5.36
  17  -1  -8   13.26    4.44
 -17   1   8   17.03    5.14
  17   1  -8   10.70    3.75
   7  -7  -1    8.01    5.73
   7   7  -1   11.72    4.16
   7  -7  -1    7.47    5.49
  -7   7   1    3.40    4.75
  -7   7   1    8.02    4.47
  -7  -7   1    7.60    5.34
   7   7  -1    5.76    5.10
  -7   7   1   10.61    4.66
  -7   7   1    3.17    4.93
   7  -7  -1   10.13    4.43
  -7  -7   1    6.27    4.54
   7   7  -1    9.79    4.42
  -7  -7   1    6.95    4.32
   4  -2 -13    5.47    2.75
   4  -2 -13   11.81    6.15
   4   2 -13   13.93    4.31
  -4   2  13   10.69    4.11
   4  -2 -13    9.00    5.39
   4   2 -13    9.47    2.69
   4   2 -13   20.19    2.89
   4  -2 -13   12.77    3.83
   4  -2 -13   13.44    2.92
   4   2 -13   19.04    6.92
   4   2 -13   16.44    3.64
   4  -2 -13    5.96    4.04
  -7   7   3   90.54    6.87
  -7   7   3   96.64    6.79
   7  -7  -3   99.63    7.78
  -7   7   3  100.28    5.90
  -7  -7   3   97.76    6.23
   7   7  -3   88.59    6.54
  -7  -7   3   92.67    5.70
   7  -7  -3   98.13    7.09
   7  -7  -3  100.42    7.62
  -7   7   3  104.01    6.82
  -7   7   3   94.47    7.02
   7   7  -3   98.38    6.84
  -7  -7   3   96.82    7.16
  -7  -7   3   98.69    8.13
  16   0 -10 3596.27  143.30
 -16   0  10 3703.24  144.06
  16   0 -10 3816.41  143.74
  16   0 -10 3821.60  143.24
  14  -2 -11  543.66   19.69
 -14  -2  11  446.00   20.62
  14   2 -11  475.45   20.08
  14   2 -11  540.38   20.10
  14   2 -11  484.91   19.22
  14  -2 -11  546.88   20.96
  14  -2 -11  512.75   19.78
  14   2 -11  423.72   19.14
  14  -2 -11  537.46   21.13
 -14   2  11  499.56   20.80
  14   2 -11  522.73   21.53
 -14  -2  11  515.92   21.47
  16   0   1   -3.20    5.29
 -16   0  -1    2.26    5.01
  16   0   1    4.50    4.80
 -16   0  -1   -1.34    4.91
  12  -4 -10 1831.83   67.94
  12  -4 -10 1841.89   68.07
 -12   4  10 1819.16   68.88
  12   4 -10 1701.77   67.40
 -12  -4  10 1891.11   67.64
  12   4 -10 1824.94   68.95
  12   4 -10 1691.78   68.13
  12   4 -10 1743.03   67.27
 -12  -4  10 1440.17   68.41
  12  -4 -10 1564.22   68.43
 -12   4  10 1778.28   68.25
 -12   4  10 1794.93   67.94
 -12   0  -6  143.74    9.48
 -12   0  -6  149.76    8.68
  12   0   6  155.06    8.45
  12   0   6  149.26    6.70
  12   0   6  148.65    7.13
  16  -2  -9  136.73    7.40
  16   2  -9  123.42    6.32
 -16  -2   9  123.20    7.37
 -16   2   9  153.71    8.37
 -16  -2   9  142.44    9.18
 -16  -2   9  128.87    7.98
  16  -2  -9  134.49    8.49
  16   2  -9  145.05    7.82
  16  -2   0  240.97   11.20
 -16  -2   0  227.77   11.08
  16   2   0  227.27   11.48
 -16   2   0  206.41   11.80
 -16   2   0  215.89   11.05
 -16   2   0  229.41   11.58
 -16  -2   0  234.28   11.55
 -16   2   0  248.53   11.82
  16  -2   0  226.22   11.46
  16   2   0  225.61   11.07
  16  -2   0  230.58   11.72
  13   5  -1  368.83   16.52
  13   5  -1  382.93   16.81
 -13  -5   1  382.69   17.04
  13  -5  -1  377.82   16.39
 -13   5   1  385.88   16.66
 -13   5   1  358.07   16.94
 -13   5   1  389.83   16.06
  13  -5  -1  369.89   16.59
  13   5  -1  375.43   16.23
 -13  -5   1  372.56   16.31
 -13  -5   1  379.91   16.17
  13  -5  -1  364.20   16.93
 -13  -5   1  409.07   17.36
  10  -4 -11   39.95    4.11
  10   4 -11   41.19    5.49
  10  -4 -11   41.06    4.88
  10   4 -11   41.86    4.55
 -10  -4  11   34.13    6.65
  10   4 -11   35.41    2.84
 -10   4  11   37.71    5.78
  10  -4 -11   27.38    3.26
 -10   4  11   44.94    3.93
  -6   6  -5  792.71   32.06
   6   6   5  777.66   31.52
   6  -6   5  818.14   31.30
   6  -6   5  830.78   32.22
  -6  -6  -5  768.98   31.60
  -6  -6  -5  814.16   32.79
  -6  -6  -5  823.40   32.96
   6  -6   5  677.45   33.60
  -6   6  -5  795.15   33.09
   6  -6   5  821.26   31.18
   6   6   5  824.90   32.00
   6   6   5  753.48   30.92
   6   6   5  768.47   32.20
  -6   6  -5  822.15   31.45
 -15  -3   9  119.25    7.89
  15  -3  -9  130.34    6.20
 -15  -3   9  119.02    7.20
  15   3  -9   84.77    4.40
 -15   3   9  122.87    7.24
  15   3  -9  112.57    6.51
  15  -3  -9  115.82    7.75
 -15  -3   9  119.34    6.78
  15  -3  -9  121.71    6.06
 -15   3   9  114.57    6.29
   8   4   7   51.24    6.12
   8  -4   7   36.03    4.31
   8   4   7   35.11    2.79
  -8   4  -7   41.85    4.32
  -8  -4  -7   41.07    3.54
  -8  -4  -7   41.05    6.95
  -8  -4  -7   44.69    5.40
   8  -4   7   38.39    5.70
  -8   4  -7   39.70    6.59
   8  -4   7   43.79    4.99
   8   4   7   33.75    4.63
   3  -7   4 2381.18   91.92
   3  -7   4 2500.62   90.70
  -3  -7  -4 2234.27   91.54
   3  -7   4 2305.34   90.15
  -3   7  -4 2481.15   92.14
   3   7   4 2467.52   91.39
  -3  -7  -4 2398.99   90.96
   3  -7   4 2478.94   92.22
   3   7   4 2037.80   89.93
   3   7   4 2480.48   90.97
  -3  -7  -4 2436.90   91.62
  -3   7  -4 2512.51   90.84
   3  -7   4 2419.64   90.97
   3   7   4 2325.42   90.52
  -3   7  -4 2419.47   91.27
  11  -1 -13  302.92   14.04
  11  -1 -13  333.98   14.36
  11   1 -13  332.16   13.74
  11   1 -13  307.13   14.20
  11  -1 -13  314.32   14.47
  11   1 -13  371.00   15.21
  11  -1 -13  310.00   13.78
  11   1 -13  320.92   14.25
  11  -1 -13  343.74   14.00
  11   1 -13  330.68   13.93
   1  -3 -12   -2.68    3.84
   1   3 -12    1.08    3.44
   1   3 -12    3.04    1.47
   1   3 -12    1.84    6.27
  -1   3  12    2.63    3.96
   1  -3 -12    4.83    2.00
   1   3 -12    1.00    4.17
   1  -3 -12    7.08    3.90
   1  -3 -12    2.73    5.93
  -1  -3  12    0.70    4.28
   0  -6  -8  203.98   11.04
   0   6  -8  215.97    9.48
   0  -6  -8  195.31   11.22
   0   6   8  217.13   10.77
   0   6   8  199.37    9.43
   0  -6  -8  211.52    9.93
   0  -6   8  212.18    9.88
   0   6  -8  216.09   10.37
   1   7   5    0.18    4.11
   1  -7   5    5.59    6.27
   1   7   5    0.24    2.59
  -1  -7  -5    0.50    5.16
   1   7   5   -0.23    4.88
   1  -7   5    3.23    4.08
   1  -7   5    5.18    6.05
   1   7   5    7.34    3.49
  -1   7  -5   -1.78    3.94
[truncated: 11,926,586 more chars]
